# Supplementary material for: Comparative transcriptome and translatome analysis in contrasting rice genotypes reveals differential mRNA translation in salt-tolerant Pokkali under salt stress
Source: BMC Genomics. 2018 Dec 31;19(Suppl 10):935. doi: 10.1186/s12864-018-5279-4 (PMC6311934; doi:10.1186/s12864-018-5279-4)
Supplement: Supplementary file 3 — Table S2. Highly expressed genes of Pok and IR29 under control conditions. (XLSX 17980 kb) [file 12864_2018_5279_MOESM3_ESM.xlsx]

## Sheet: only =
msu_id	locus_id	class_code	gene	locus	ir29_rna_status	ir29_rna_control	ir29_rna_salt	ir29_rna_log2_fold_change	ir29_rna_test_stat	ir29_rna_p_value	ir29_rna_q_value	ir29_rna_significant	pok_rna_status	pok_rna_control	pok_rna_salt	pok_rna_log2_fold_change	pok_rna_test_stat	pok_rna_p_value	pok_rna_q_value	pok_rna_significant	ir29_ps_status	ir29_ps_control	ir29_ps_salt	ir29_ps_log2_fold_change	ir29_ps_test_stat	ir29_ps_p_value	ir29_ps_q_value	ir29_ps_significant	pok_ps_status	pok_ps_control	pok_ps_salt	pok_ps_log2_fold_change	pok_ps_test_stat	pok_ps_p_value	pok_ps_q_value	pok_ps_significant
13101.m00953	LOC_Os01g08990.1	=	conserved hypothetical protein	chr01:4484746-4531980	FAIL	0.663366	0	0	0	1	1	no	LOWDATA	0.0846602	0.0444601	-0.929173	0	1	1	no	NOTEST	0	0	0	0	1	1	no	FAIL	0.33231	0.594037	0	0	1	1	no
13101.m00955	LOC_Os01g09010.1	=	transferase family protein, putative, expressed	chr01:4484746-4531980	FAIL	12.9464	19.8742	0	0	1	1	no	LOWDATA	20.6647	12.7957	-0.691506	0	1	1	no	LOWDATA	9.34976	23.2381	1.31349	0	1	1	no	FAIL	17.9274	36.1688	0	0	1	1	no
13101.m01446	LOC_Os01g13160.1	=	expressed protein	chr01:7332688-7365113	FAIL	13.2341	15.4165	0	0	1	1	no	OK	13.3833	11.1359	-0.265216	0.477285	0.633159	0.859964	no	FAIL	7.7622	10.2643	0	0	1	1	no	LOWDATA	7.08772	10.2717	0.535274	0	1	1	no
13101.m01447	LOC_Os01g13170.1	=	ubiquitin-conjugating enzyme E2, putative, expressed	chr01:7332688-7365113	FAIL	14.9131	9.60449	0	0	1	1	no	LOWDATA	11.252	17.5053	0.637608	0	1	1	no	FAIL	3.42025	6.3474	0	0	1	1	no	LOWDATA	3.86518	5.53969	0.519271	0	1	1	no
13101.m05676	LOC_Os01g54050.1	=	histidine-containing phosphotransfer protein, putative, expressed	chr01:31077564-31115107	FAIL	1.62971	2.15843	0	0	1	1	no	LOWDATA	1.86447	0.740496	-1.3322	0	1	1	no	LOWDATA	2.04972	0.802751	-1.3524	0	1	1	no	LOWDATA	1.18928	1.40019	0.235532	0	1	1	no
13101.m05677	LOC_Os01g54060.1	=	hypothetical protein	chr01:31077564-31115107	FAIL	0	0	0	0	1	1	no	NOTEST	0	0	0	0	1	1	no	NOTEST	0	0	0	0	1	1	no	NOTEST	0	0	0	0	1	1	no
13101.m05679	LOC_Os01g54080.1	=	kinesin motor protein-related, putative, expressed	chr01:31077564-31115107	FAIL	2.77062	0.124917	0	0	1	1	no	LOWDATA	0.819271	2.03888	1.31537	0	1	1	no	LOWDATA	2.22105	2.3729	0.0954133	0	1	1	no	LOWDATA	2.96428	3.27766	0.144988	0	1	1	no
13101.m05680	LOC_Os01g54090.1	=	expressed protein	chr01:31077564-31115107	FAIL	0.760618	0.382373	0	0	1	1	no	LOWDATA	0.53791	1.11711	1.05433	0	1	1	no	LOWDATA	0.61302	0.582445	-0.0738114	0	1	1	no	LOWDATA	1.06417	1.77297	0.736439	0	1	1	no
13101.m06947	LOC_Os01g64550.1	=	hypothetical protein	chr01:37450278-37462745	FAIL	0	0	0	0	1	1	no	NOTEST	0	0.241588	1e+300	1e+300	0.0786496	1	no	NOTEST	0	0	0	0	1	1	no	FAIL	0	0	0	0	1	1	no
13101.m06948	LOC_Os01g64560.1	=	helix-loop-helix DNA-binding protein, putative, expressed	chr01:37450278-37462745	FAIL	0	3.22458	0	0	1	1	no	NOTEST	3.39716	1.07034	-1.66625	2.63748	0.00835253	1	no	OK	1.37999	3.80096	1.46171	-2.0023	0.0452525	0.343705	no	FAIL	1.97712	0	0	0	1	1	no
13101.m06949	LOC_Os01g64560.2	=	helix-loop-helix DNA-binding protein, putative, expressed	chr01:37450278-37462745	FAIL	0	3.38552	0	0	1	1	no	NOTEST	1.19496	1.34907	0.175006	-0.263001	0.79255	1	no	NOTEST	0.648044	0.74127	0.193908	-0.224937	0.822028	1	no	FAIL	0.892195	0	0	0	1	1	no
13101.m00257	LOC_Os01g03070.2	=	transposon protein, putative, unclassified, expressed	chr01:1170556-1178372	FAIL	4.02502	6.30294	0	0	1	1	no	FAIL	4.85955	3.50557	0	0	1	1	no	FAIL	3.29152	2.48262	0	0	1	1	no	OK	7.33726	8.54981	0.220651	-0.376167	0.706793	1	no
13101.m00256	LOC_Os01g03070.1	=	transposon protein, putative, unclassified, expressed	chr01:1170556-1178372	FAIL	15.9178	18.1081	0	0	1	1	no	FAIL	19.2233	7.22764	0	0	1	1	no	FAIL	15.5466	23.8935	0	0	1	1	no	OK	11.3869	12.6782	0.154971	-0.275906	0.78262	1	no
13101.m00946	LOC_Os01g08930.1	=	DEAD-box ATP-dependent RNA helicase, putative, expressed	chr01:4484746-4531980	FAIL	8.5354	6.97578	0	0	1	1	no	LOWDATA	16.2926	6.92698	-1.23392	0	1	1	no	OK	7.58749	6.74339	-0.170148	0.136358	0.891538	1	no	FAIL	12.8066	8.94163	0	0	1	1	no
13101.m00947	LOC_Os01g08940.1	=	hypothetical protein	chr01:4484746-4531980	FAIL	0	0	0	0	1	1	no	NOTEST	0	0	0	0	1	1	no	NOTEST	0	0	0	0	1	1	no	FAIL	0	0	0	0	1	1	no
13101.m00949	LOC_Os01g08960.1	=	phosducin-like protein 3, putative, expressed	chr01:4484746-4531980	FAIL	13.4986	21.105	0	0	1	1	no	LOWDATA	11.7272	15.8445	0.434122	0	1	1	no	OK	12.9986	22.1866	0.771334	-1.39134	0.164121	0.679201	no	FAIL	13.6063	18.5423	0	0	1	1	no
13101.m00952	LOC_Os01g08980.1	=	expressed protein	chr01:4484746-4531980	FAIL	0	0	0	0	1	1	no	NOTEST	0.0220759	0	0	0	1	1	no	NOTEST	0	0	0	0	1	1	no	FAIL	0	0	0	0	1	1	no
13101.m00954	LOC_Os01g09000.1	=	glutaminyl-tRNA synthetase, putative, expressed	chr01:4484746-4531980	FAIL	0	0	0	0	1	1	no	NOTEST	0	0	0	0	1	1	no	NOTEST	0	0	0	0	1	1	no	FAIL	0	0	0	0	1	1	no
13101.m01448	LOC_Os01g13180.1	=	expressed protein	chr01:7332688-7365113	FAIL	0.0994026	0.394439	0	0	1	1	no	LOWDATA	0.0867004	0.0953234	0.136791	0	1	1	no	FAIL	0.0988063	0.10902	0	0	1	1	no	NOTEST	0.0791645	0.15876	1.00392	-0.270207	0.787001	1	no
13101.m01450	LOC_Os01g13200.1	=	abscisic acid insensitive 8, putative, expressed	chr01:7332688-7365113	FAIL	4.15332	2.91401	0	0	1	1	no	LOWDATA	4.81116	5.28224	0.134764	0	1	1	no	FAIL	5.51016	6.08854	0	0	1	1	no	LOWDATA	6.23111	7.78395	0.321014	0	1	1	no
13101.m01451	LOC_Os01g13210.1	=	salt stress root protein RS1, putative, expressed	chr01:7332688-7365113	FAIL	28.4618	30.8695	0	0	1	1	no	LOWDATA	38.9055	40.109	0.0439509	0	1	1	no	FAIL	26.1331	56.3227	0	0	1	1	no	LOWDATA	58.3482	72.0899	0.305109	0	1	1	no
13101.m03135	LOC_Os01g31220.1	=	expressed protein	chr01:17065888-17069786	FAIL	3.73129	2.93966	0	0	1	1	no	NOTEST	0	1.66955	1e+300	1e+300	0.00120472	1	no	OK	3.98776	0	0	0	1	1	no	OK	2.70288	3.79582	0.489911	-0.697671	0.485383	1	no
13101.m03134	LOC_Os01g31220.2	=	expressed protein	chr01:17065888-17069786	FAIL	0.444445	0.430752	0	0	1	1	no	NOTEST	0	0.436444	1e+300	1e+300	0.00588812	1	no	NOTEST	0.213509	0	-1e+300	-1e+300	0.45548	1	no	NOTEST	0	0.223263	1e+300	1e+300	0.0225112	1	no
13101.m04392	LOC_Os01g42700.3	=	expressed protein	chr01:24281690-24284355	FAIL	0.94175	2.55653	0	0	1	1	no	FAIL	1.89805	2.7663	0	0	1	1	no	FAIL	3.51088	4.63631	0	0	1	1	no	FAIL	5.13722	5.60543	0	0	1	1	no
13101.m15049	LOC_Os01g42700.5	=	expressed protein	chr01:24281690-24284355	FAIL	0	0	0	0	1	1	no	FAIL	0	0	0	0	1	1	no	FAIL	0	3.34944	0	0	1	1	no	FAIL	7.23826	3.06887	0	0	1	1	no
13101.m04394	LOC_Os01g42700.2	=	expressed protein	chr01:24281690-24284355	FAIL	9.73691	11.1673	0	0	1	1	no	FAIL	17.9003	9.46828	0	0	1	1	no	FAIL	15.0352	10.1083	0	0	1	1	no	FAIL	9.70614	12.241	0	0	1	1	no
13101.m04393	LOC_Os01g42700.4	=	expressed protein	chr01:24281690-24284355	FAIL	4.55128	2.46314	0	0	1	1	no	FAIL	3.64213	6.27217	0	0	1	1	no	FAIL	2.19067	6.99166	0	0	1	1	no	FAIL	8.48675	4.99865	0	0	1	1	no
13101.m04391	LOC_Os01g42700.1	=	expressed protein	chr01:24281690-24284355	FAIL	1.08456	0.752151	0	0	1	1	no	FAIL	0.531226	0	0	0	1	1	no	FAIL	0.863406	0.787729	0	0	1	1	no	FAIL	0.223085	0	0	0	1	1	no
13101.m05461	LOC_Os01g52214.1	=	ubiquinone oxidoreductase, putative, expressed	chr01:30019856-30022782	FAIL	23.1992	24.6371	0	0	1	1	no	OK	28.6628	28.6122	-0.00254443	0.00452092	0.996393	1	no	OK	27.974	19.005	-0.557709	0.85431	0.392933	0.927709	no	OK	29.7023	25.4772	-0.221369	0.375528	0.707268	1	no
13101.m05675	LOC_Os01g54040.3	=	ATP-dependent protease La, putative, expressed	chr01:31077564-31115107	FAIL	1.4646	2.81384	0	0	1	1	no	LOWDATA	1.45974	1.37501	-0.0862608	0	1	1	no	LOWDATA	2.44424	2.41861	-0.0152048	0	1	1	no	LOWDATA	0.131158	4.76879	5.18425	0	1	1	no
13101.m05673	LOC_Os01g54040.1	=	ATP-dependent protease La, putative, expressed	chr01:31077564-31115107	FAIL	2.84492	4.04296	0	0	1	1	no	LOWDATA	2.2453	1.77563	-0.338578	0	1	1	no	LOWDATA	1.53531	4.37784	1.51169	0	1	1	no	OK	3.33251	0	0	0	1	1	no
13101.m05681	LOC_Os01g54100.1	=	CK1_CaseinKinase_1a.2 - CK1 includes the casein kinase 1 kinases, expressed	chr01:31077564-31115107	FAIL	6.43272	11.9842	0	0	1	1	no	LOWDATA	7.04064	11.4467	0.701156	0	1	1	no	LOWDATA	10.06	14.9167	0.568298	0	1	1	no	LOWDATA	16.5103	13.2642	-0.315829	0	1	1	no
13101.m06883	LOC_Os01g64030.1	=	OsFBL5 - F-box domain and LRR containing protein, expressed	chr01:37189391-37196791	FAIL	3.68071	5.30022	0	0	1	1	no	LOWDATA	0.478596	0.19243	-1.31448	0	1	1	no	OK	3.62012	3.67286	0.0208661	-0.029831	0.976202	1	no	OK	3.55806	3.19589	-0.154875	0.236821	0.812795	1	no
13101.m06940	LOC_Os01g64490.1	=	protein kinase domain containing protein, expressed	chr01:37415986-37422331	FAIL	8.33299	3.97251	0	0	1	1	no	FAIL	6.08758	5.1057	0	0	1	1	no	FAIL	4.25974	5.19356	0	0	1	1	no	FAIL	6.746	7.5446	0	0	1	1	no
13101.m06946	LOC_Os01g64540.1	=	anthocyanidin 3-O-glucosyltransferase, putative, expressed	chr01:37450278-37462745	FAIL	0	3.24437	0	0	1	1	no	NOTEST	2.59632	0.620733	-2.06442	0.388759	0.697454	1	no	NOTEST	1.15435	1.12068	-0.0427042	0.00113992	0.99909	1	no	FAIL	0.767129	0	0	0	1	1	no
13102.m04970	LOC_Os02g44510.3	=	UDP-glucose glycoprotein glucosyltransferase 1 precursor, putative, expressed	chr02:26927134-26945916	FAIL	0	0	0	0	1	1	no	NOTEST	0	0	0	0	1	1	no	NOTEST	0.0649648	0	0	0	1	1	no	NOTEST	0	0	0	0	1	1	no
13102.m12451	LOC_Os02g51390.2	=	expressed protein	chr02:31303790-31532910	FAIL	0	0	0	0	1	1	no	NOTEST	0	0	0	0	1	1	no	NOTEST	0	0	0	0	1	1	no	NOTEST	0	0	0	0	1	1	no
13102.m05841	LOC_Os02g51400.1	=	AAA family ATPase, putative, expressed	chr02:31303790-31532910	FAIL	0	0	0	0	1	1	no	NOTEST	0	0	0	0	1	1	no	NOTEST	0	0	0	0	1	1	no	NOTEST	0	0	0	0	1	1	no
13102.m05844	LOC_Os02g51410.3	=	shikimate kinase, putative, expressed	chr02:31303790-31532910	FAIL	1.89693	0.94861	0	0	1	1	no	LOWDATA	10.4857	4.21663	-1.31427	0	1	1	no	LOWDATA	2.68909	9.61008	1.83743	0	1	1	no	LOWDATA	6.99955	8.01086	0.194696	0	1	1	no
13102.m05845	LOC_Os02g51410.1	=	shikimate kinase, putative, expressed	chr02:31303790-31532910	FAIL	36.3687	48.8028	0	0	1	1	no	LOWDATA	23.9761	24.6532	0.0401775	0	1	1	no	LOWDATA	24.7738	30.0659	0.279313	0	1	1	no	LOWDATA	26.3921	33.482	0.343282	0	1	1	no
13102.m05852	LOC_Os02g51450.2	=	mTERF family protein, expressed	chr02:31303790-31532910	FAIL	3.5659	3.92282	0	0	1	1	no	LOWDATA	15.794	4.87608	-1.69558	0	1	1	no	LOWDATA	6.42162	2.79419	-1.20051	0	1	1	no	LOWDATA	7.51888	8.12231	0.111372	0	1	1	no
13102.m05851	LOC_Os02g51450.1	=	mTERF family protein, expressed	chr02:31303790-31532910	FAIL	3.27496	1.35141	0	0	1	1	no	LOWDATA	3.05903	6.17796	1.01405	0	1	1	no	LOWDATA	2.97235	1.48605	-1.00012	0	1	1	no	LOWDATA	4.79701	1.24658	-1.94416	0	1	1	no
13102.m05856	LOC_Os02g51470.3	=	ATP synthase F1, delta subunit family protein, putative, expressed	chr02:31303790-31532910	FAIL	51.8303	20.7461	0	0	1	1	no	LOWDATA	113.349	74.7489	-0.600643	0	1	1	no	LOWDATA	59.4534	27.9929	-1.0867	0	1	1	no	LOWDATA	143.281	80.4736	-0.832258	0	1	1	no
13102.m05854	LOC_Os02g51470.1	=	ATP synthase F1, delta subunit family protein, putative, expressed	chr02:31303790-31532910	FAIL	0	0	0	0	1	1	no	NOTEST	0	0	0	0	1	1	no	NOTEST	0	0	0	0	1	1	no	NOTEST	0	0	0	0	1	1	no
13102.m05857	LOC_Os02g51480.1	=	PPR repeat domain containing protein, putative, expressed	chr02:31303790-31532910	FAIL	3.85942	2.2577	0	0	1	1	no	LOWDATA	5.2049	3.13631	-0.7308	0	1	1	no	LOWDATA	3.59332	2.7332	-0.394723	0	1	1	no	LOWDATA	5.16202	2.59288	-0.993382	0	1	1	no
13102.m06740	LOC_Os02g58210.2	=	jmjC domain containing protein, expressed	chr02:35614367-35624937	FAIL	0	0.50985	0	0	1	1	no	NOTEST	1.22855	0	-1e+300	-1e+300	0.000578035	1	no	FAIL	0	0.570013	0	0	1	1	no	FAIL	0	0	0	0	1	1	no
13102.m06741	LOC_Os02g58210.1	=	jmjC domain containing protein, expressed	chr02:35614367-35624937	FAIL	0	0.364639	0	0	1	1	no	NOTEST	0.548034	0	-1e+300	-1e+300	0.00283619	1	no	FAIL	0	0.584957	0	0	1	1	no	FAIL	0	0	0	0	1	1	no
13102.m06764	LOC_Os02g58410.1	=	expressed protein	chr02:35699765-35724695	FAIL	0	0	0	0	1	1	no	NOTEST	0	0	0	0	1	1	no	NOTEST	0	0	0	0	1	1	no	NOTEST	0	0	0	0	1	1	no
13102.m12376	LOC_Os02g12480.9	=	expressed protein	chr02:6508791-6513877	FAIL	11.3701	8.37919	0	0	1	1	no	OK	5.6091	3.85649	-0.540481	0.262994	0.792555	0.939627	no	OK	5.83174	16.0301	1.45878	-2.28243	0.0224639	0.223474	no	OK	11.9799	12.8007	0.0956047	-0.164841	0.869069	1	no
13102.m01358	LOC_Os02g12480.8	=	expressed protein	chr02:6508791-6513877	FAIL	1.84614	2.31149	0	0	1	1	no	NOTEST	1.3952	0	-1e+300	-1e+300	0.00351859	1	no	OK	2.18886	3.42351	0.645299	-0.824151	0.409854	0.939682	no	OK	5.97732	3.10029	-0.947094	1.36179	0.173263	0.790283	no
13102.m01352	LOC_Os02g12480.4	=	expressed protein	chr02:6508791-6513877	FAIL	17.1334	9.22396	0	0	1	1	no	OK	6.81086	5.31952	-0.35654	0.194605	0.845702	0.965029	no	OK	2.83135	1.0542	-1.42534	1.73537	0.0826745	0.487821	no	NOTEST	0	1.91073	1e+300	1e+300	0.00395056	1	no
13102.m01355	LOC_Os02g12480.2	=	expressed protein	chr02:6508791-6513877	FAIL	5.61916	3.58785	0	0	1	1	no	OK	2.47166	5.76631	1.22217	-0.612614	0.540131	0.805964	no	OK	2.55995	2.13401	-0.26255	0.331231	0.74047	1	no	NOTEST	2.34246	2.75174	0.232318	-0.306421	0.759284	1	no
13102.m01357	LOC_Os02g12480.6	=	expressed protein	chr02:6508791-6513877	FAIL	4.63484	10.0107	0	0	1	1	no	OK	22.1524	4.61903	-2.2618	1.58172	0.113712	0.401448	no	OK	9.61099	10.226	0.0894794	-0.140806	0.888023	1	no	OK	7.3953	7.64597	0.0480921	-0.0831371	0.933742	1	no
13102.m04503	LOC_Os02g40410.3	=	expressed protein	chr02:24465667-24496173	FAIL	0.704441	0.404835	0	0	1	1	no	NOTEST	0	0	0	0	1	1	no	NOTEST	0	0	0	0	1	1	no	NOTEST	1.29898	1.28125	-0.0198289	0.00783244	0.993751	1	no
13102.m04501	LOC_Os02g40410.1	=	expressed protein	chr02:24465667-24496173	FAIL	0.0175685	0.19329	0	0	1	1	no	OK	5.08833	0.550979	-3.20712	1.21203	0.2255	0.553642	no	LOWDATA	2.40831	2.79719	0.215958	0	1	1	no	LOWDATA	1.24604	1.28349	0.0427188	0	1	1	no
13102.m04504	LOC_Os02g40420.1	=	expressed protein	chr02:24465667-24496173	FAIL	0.414782	0.368357	0	0	1	1	no	NOTEST	0.26215	0.153006	-0.776806	0.269892	0.787243	1	no	LOWDATA	0.205265	0.36342	0.824153	0	1	1	no	LOWDATA	0.149601	0.379108	1.34149	0	1	1	no
13102.m05819	LOC_Os02g51190.1	=	retrotransposon protein, putative, unclassified	chr02:31303790-31532910	FAIL	0.0507004	0.0341036	0	0	1	1	no	LOWDATA	0.0884512	0.0343251	-1.36562	0	1	1	no	LOWDATA	0.00980244	0.0196285	1.00174	0	1	1	no	LOWDATA	0.0101809	0.00816684	-0.318009	0	1	1	no
13102.m05820	LOC_Os02g51200.1	=	retrotransposon protein, putative, LINE subclass	chr02:31303790-31532910	FAIL	0.007571	0.00494119	0	0	1	1	no	LOWDATA	0.0330177	0.00445769	-2.88887	0	1	1	no	NOTEST	0.00113157	0	0	0	1	1	no	NOTEST	0.00370203	0	0	0	1	1	no
13102.m05826	LOC_Os02g51260.1	=	retrotransposon protein, putative, unclassified	chr02:31303790-31532910	FAIL	0	0	0	0	1	1	no	NOTEST	0.012522	0	0	0	1	1	no	NOTEST	0	0	0	0	1	1	no	NOTEST	0	0	0	0	1	1	no
13102.m05830	LOC_Os02g51300.1	=	AP2 domain containing protein, expressed	chr02:31303790-31532910	FAIL	1.72665	1.47364	0	0	1	1	no	LOWDATA	4.05489	1.22074	-1.73191	0	1	1	no	LOWDATA	2.45738	3.14143	0.354301	0	1	1	no	LOWDATA	3.99778	1.56288	-1.35499	0	1	1	no
13102.m05832	LOC_Os02g51320.1	=	helix-loop-helix DNA-binding domain containing protein, expressed	chr02:31303790-31532910	FAIL	7.79908	3.5382	0	0	1	1	no	LOWDATA	10.5869	5.51612	-0.940552	0	1	1	no	LOWDATA	10.3034	5.46423	-0.915027	0	1	1	no	LOWDATA	11.9757	9.28829	-0.366619	0	1	1	no
13102.m05833	LOC_Os02g51330.2	=	MAG2, putative, expressed	chr02:31303790-31532910	FAIL	4.12424	4.31902	0	0	1	1	no	LOWDATA	2.8735	1.77363	-0.696106	0	1	1	no	OK	0	0	0	0	1	1	no	LOWDATA	3.22977	3.92939	0.282872	0	1	1	no
13102.m05834	LOC_Os02g51330.1	=	MAG2, putative, expressed	chr02:31303790-31532910	FAIL	0	1.34576	0	0	1	1	no	NOTEST	0.310298	0	0	0	1	1	no	LOWDATA	2.57728	0.682915	-1.91607	0	1	1	no	NOTEST	0	0	0	0	1	1	no
13102.m05836	LOC_Os02g51350.1	=	OsFBK10 - F-box domain and kelch repeat containing protein, expressed	chr02:31303790-31532910	FAIL	18.0929	28.368	0	0	1	1	no	LOWDATA	17.0573	6.03772	-1.49832	0	1	1	no	LOWDATA	11.6624	26.7857	1.1996	0	1	1	no	LOWDATA	11.3993	20.0134	0.812027	0	1	1	no
13102.m05838	LOC_Os02g51370.1	=	glutaredoxin, putative, expressed	chr02:31303790-31532910	FAIL	6.01641	3.76558	0	0	1	1	no	LOWDATA	6.21948	6.95633	0.161533	0	1	1	no	LOWDATA	5.22836	4.80877	-0.120689	0	1	1	no	LOWDATA	8.9512	7.90572	-0.179185	0	1	1	no
13102.m05839	LOC_Os02g51380.1	=	hypothetical protein	chr02:31303790-31532910	FAIL	0	0	0	0	1	1	no	NOTEST	0	0	0	0	1	1	no	NOTEST	0	0	0	0	1	1	no	NOTEST	0	0	0	0	1	1	no
13102.m05842	LOC_Os02g51404.1	=	expressed protein	chr02:31303790-31532910	FAIL	0	0.152618	0	0	1	1	no	NOTEST	0	0	0	0	1	1	no	NOTEST	0	0	0	0	1	1	no	NOTEST	0	0	0	0	1	1	no
13102.m05846	LOC_Os02g51414.1	=	expressed protein	chr02:31303790-31532910	FAIL	9.1825	9.00468	0	0	1	1	no	LOWDATA	12.327	10.3348	-0.254303	0	1	1	no	LOWDATA	5.02353	7.109	0.500944	0	1	1	no	LOWDATA	7.339	8.00755	0.125777	0	1	1	no
13102.m05847	LOC_Os02g51420.1	=	hypothetical protein	chr02:31303790-31532910	FAIL	8.45977	2.45911	0	0	1	1	no	LOWDATA	3.90729	1.87044	-1.0628	0	1	1	no	LOWDATA	2.524	10.3165	2.03117	0	1	1	no	LOWDATA	8.14453	4.85803	-0.74546	0	1	1	no
13102.m05849	LOC_Os02g51430.1	=	SEC6, putative, expressed	chr02:31303790-31532910	FAIL	0.503005	6.3242	0	0	1	1	no	NOTEST	2.84945	0	0	0	1	1	no	LOWDATA	3.12379	2.43406	-0.359934	0	1	1	no	LOWDATA	4.26975	0.125502	-5.08836	0	1	1	no
13102.m05850	LOC_Os02g51440.1	=	laccase precursor protein, putative, expressed	chr02:31303790-31532910	FAIL	0.604014	11.2271	0	0	1	1	no	LOWDATA	0.0365854	0.0201112	-0.863271	0	1	1	no	LOWDATA	0.080406	3.46163	5.428	0	1	1	no	LOWDATA	0.100212	0.271308	1.43688	0	1	1	no
13102.m05858	LOC_Os02g51490.1	=	methyltransferase, putative, expressed	chr02:31303790-31532910	FAIL	3.92214	2.57593	0	0	1	1	no	LOWDATA	2.9965	3.34584	0.159087	0	1	1	no	LOWDATA	3.82346	2.78297	-0.458253	0	1	1	no	LOWDATA	2.75088	3.13871	0.190282	0	1	1	no
13102.m05861	LOC_Os02g51500.3	=	membrane-anchored ubiquitin-fold protein, putative, expressed	chr02:31303790-31532910	FAIL	18.7634	7.09448	0	0	1	1	no	LOWDATA	21.0391	3.49778	-2.58856	0	1	1	no	LOWDATA	11.8176	9.71236	-0.283044	0	1	1	no	LOWDATA	8.41227	15.0059	0.834963	0	1	1	no
13102.m05859	LOC_Os02g51500.1	=	membrane-anchored ubiquitin-fold protein, putative, expressed	chr02:31303790-31532910	FAIL	0.339568	0	0	0	1	1	no	OK	0	0	0	0	1	1	no	NOTEST	0	0	0	0	1	1	no	NOTEST	0	0	0	0	1	1	no
13102.m05860	LOC_Os02g51500.2	=	membrane-anchored ubiquitin-fold protein, putative, expressed	chr02:31303790-31532910	FAIL	9.49393	36.0162	0	0	1	1	no	LOWDATA	7.75612	19.2726	1.31315	0	1	1	no	LOWDATA	4.43815	17.9945	2.01952	0	1	1	no	LOWDATA	10.9149	10.0403	-0.120503	0	1	1	no
13102.m06184	LOC_Os02g54060.2	=	chaperonin, putative, expressed	chr02:33107622-33111434	FAIL	10.0818	5.69837	0	0	1	1	no	FAIL	12.5975	2.88986	0	0	1	1	no	FAIL	9.31358	2.50451	0	0	1	1	no	FAIL	25.5814	3.04375	0	0	1	1	no
13102.m06183	LOC_Os02g54060.1	=	chaperonin, putative, expressed	chr02:33107622-33111434	FAIL	0.501634	0.265477	0	0	1	1	no	FAIL	16.2975	6.51907	0	0	1	1	no	FAIL	8.57804	2.88521	0	0	1	1	no	FAIL	4.32468	6.92883	0	0	1	1	no
13102.m06739	LOC_Os02g58200.1	=	expressed protein	chr02:35614367-35624937	FAIL	0	2.31162	0	0	1	1	no	OK	4.28489	0	-1e+300	-1e+300	0.0216224	0.160944	no	FAIL	0	0	0	0	1	1	no	FAIL	0	0	0	0	1	1	no
13102.m06762	LOC_Os02g58390.1	=	inactive receptor kinase At2g26730 precursor, putative, expressed	chr02:35699765-35724695	FAIL	4.20301	3.00241	0	0	1	1	no	OK	5.07273	3.66854	-0.467558	0.551381	0.581373	0.8307	no	NOTEST	1.00717	0.773533	-0.380778	0.0844737	0.93268	1	no	NOTEST	3.00186	2.07082	-0.535658	0.271908	0.785693	1	no
13102.m06763	LOC_Os02g58400.1	=	hypothetical protein	chr02:35699765-35724695	FAIL	0.572437	0.183435	0	0	1	1	no	NOTEST	0.164995	0	0	0	1	1	no	NOTEST	0	0	0	0	1	1	no	NOTEST	0.196497	0	0	0	1	1	no
13103.m02155	LOC_Os03g18000.1	=	phosphoinositide-specific phospholipase C, putative	chr03:10023078-10028162	FAIL	0	0	0	0	1	1	no	FAIL	1.5034	0	0	0	1	1	no	FAIL	0	0.0945671	0	0	1	1	no	FAIL	0.274679	0	0	0	1	1	no
13103.m03412	LOC_Os03g29760.2	=	nuclear transcription factor Y subunit, putative, expressed	chr03:16963919-16969680	FAIL	3.36106	5.15678	0	0	1	1	no	NOTEST	3.05455	0.628903	-2.28005	3.27211	0.00106747	1	no	NOTEST	1.07928	0	0	0	1	1	no	NOTEST	0	0	0	0	1	1	no
13103.m03413	LOC_Os03g29760.3	=	nuclear transcription factor Y subunit, putative, expressed	chr03:16963919-16969680	FAIL	0.642479	0	0	0	1	1	no	NOTEST	0	0	0	0	1	1	no	NOTEST	0	0	0	0	1	1	no	NOTEST	1.03775	0	-1e+300	-1e+300	0.32606	1	no
13103.m03411	LOC_Os03g29760.1	=	nuclear transcription factor Y subunit, putative, expressed	chr03:16963919-16969680	FAIL	3.23001	2.97983	0	0	1	1	no	NOTEST	2.95128	1.43342	-1.04188	0.579547	0.56222	1	no	OK	4.06191	4.87634	0.26364	-0.256964	0.797206	1	no	NOTEST	2.21382	0	0	0	1	1	no
13103.m03637	LOC_Os03g31839.1	=	transposon protein, putative, unclassified	chr03:18203432-18221427	FAIL	0.025187	0.00477991	0	0	1	1	no	NOTEST	0.037018	0	0	0	1	1	no	NOTEST	0	0	0	0	1	1	no	LOWDATA	0.0390831	0.0540269	0.467135	0	1	1	no
13103.m04584	LOC_Os03g42650.2	=	vegetative storage protein, putative, expressed	chr03:23737033-23744313	FAIL	0	0.106373	0	0	1	1	no	NOTEST	0	0	0	0	1	1	no	NOTEST	0.850192	0	-1e+300	-1e+300	0.255266	1	no	FAIL	0	0	0	0	1	1	no
13103.m04583	LOC_Os03g42650.1	=	vegetative storage protein, putative, expressed	chr03:23737033-23744313	FAIL	0	1.16323	0	0	1	1	no	NOTEST	0	0	0	0	1	1	no	NOTEST	0	0	0	0	1	1	no	FAIL	0	0	0	0	1	1	no
13103.m05921	LOC_Os03g54050.2	=	anther-specific proline-rich protein APG precursor, putative, expressed	chr03:30982609-31006827	FAIL	16.8993	19.8598	0	0	1	1	no	OK	16.285	23.8362	0.549612	-0.901211	0.367476	0.684769	no	LOWDATA	8.67744	18.1585	1.0653	0	1	1	no	LOWDATA	20.5917	25.3627	0.300648	0	1	1	no
13103.m05922	LOC_Os03g54050.1	=	anther-specific proline-rich protein APG precursor, putative, expressed	chr03:30982609-31006827	FAIL	7.68368	8.55558	0	0	1	1	no	OK	7.63486	3.58057	-1.09241	1.0529	0.292385	0.622264	no	LOWDATA	10.6801	8.0417	-0.409352	0	1	1	no	LOWDATA	5.43787	11.1584	1.03702	0	1	1	no
13103.m05925	LOC_Os03g54084.1	=	phytochrome C, putative, expressed	chr03:30982609-31006827	FAIL	8.25516	10.0964	0	0	1	1	no	OK	14.3088	13.4429	-0.0900556	0.165683	0.868406	0.972638	no	LOWDATA	7.35846	11.195	0.605375	0	1	1	no	LOWDATA	7.03749	12.8453	0.868107	0	1	1	no
13103.m05926	LOC_Os03g54091.1	=	OsTOP6A1 - Topoisomerase 6 subunit A homolog 1, expressed	chr03:30982609-31006827	FAIL	1.38513	1.62777	0	0	1	1	no	LOWDATA	0.783674	1.15907	0.564638	0	1	1	no	LOWDATA	0.570032	0.890953	0.644307	0	1	1	no	LOWDATA	0.504273	1.03884	1.0427	0	1	1	no
13103.m06223	LOC_Os03g56904.1	=	hypothetical protein	chr03:32387637-32625406	FAIL	0	0	0	0	1	1	no	FAIL	0.212421	0	0	0	1	1	no	FAIL	0	0	0	0	1	1	no	NOTEST	0	0	0	0	1	1	no
13103.m06226	LOC_Os03g56930.1	=	app1, putative, expressed	chr03:32387637-32625406	FAIL	11.9772	0	0	0	1	1	no	FAIL	41.096	27.2112	0	0	1	1	no	FAIL	18.7786	11.4894	0	0	1	1	no	OK	21.8101	31.2074	0.516892	-1.09119	0.27519	0.947494	no
13103.m06227	LOC_Os03g56940.1	=	app1, putative, expressed	chr03:32387637-32625406	FAIL	0.396377	0	0	0	1	1	no	FAIL	1.3685	0.39596	0	0	1	1	no	FAIL	0.246257	0.0905707	0	0	1	1	no	NOTEST	0.197303	0.19784	0.00391892	-0.00118251	0.999056	1	no
13103.m06229	LOC_Os03g56944.1	=	lysine-rich arabinogalactan protein 19 precursor, putative, expressed	chr03:32387637-32625406	FAIL	3.63871	0	0	0	1	1	no	FAIL	5.04543	5.19044	0	0	1	1	no	FAIL	5.0488	2.76342	0	0	1	1	no	OK	4.75649	5.9916	0.333043	-0.428532	0.668264	1	no
13103.m06231	LOC_Os03g56950.2	=	phytochrome-interacting factor 4, putative, expressed	chr03:32387637-32625406	FAIL	8.92144	0	0	0	1	1	no	FAIL	10.004	3.23585	0	0	1	1	no	FAIL	8.88631	0.583285	0	0	1	1	no	OK	4.31265	2.52878	-0.770134	0.387622	0.698296	1	no
13103.m13025	LOC_Os03g56950.7	=	phytochrome-interacting factor 4, putative, expressed	chr03:32387637-32625406	FAIL	0	0	0	0	1	1	no	FAIL	0	0	0	0	1	1	no	FAIL	0	0	0	0	1	1	no	NOTEST	0	0	0	0	1	1	no
13103.m06235	LOC_Os03g56950.4	=	phytochrome-interacting factor 4, putative, expressed	chr03:32387637-32625406	FAIL	6.23406	0	0	0	1	1	no	FAIL	7.14997	2.26372	0	0	1	1	no	FAIL	7.53512	3.45842	0	0	1	1	no	NOTEST	2.32632	0.65115	-1.83699	0.285489	0.77527	1	no
13103.m06234	LOC_Os03g56950.1	=	phytochrome-interacting factor 4, putative, expressed	chr03:32387637-32625406	FAIL	4.65526	0	0	0	1	1	no	FAIL	8.36327	6.8358	0	0	1	1	no	FAIL	0.952084	5.15816	0	0	1	1	no	LOWDATA	4.43683	4.80216	0.114154	0	1	1	no
13103.m06238	LOC_Os03g56974.1	=	latent nuclear antigen, putative	chr03:32387637-32625406	FAIL	0.826803	0	0	0	1	1	no	FAIL	0.380607	0.0660811	0	0	1	1	no	FAIL	0	0.226728	0	0	1	1	no	LOWDATA	0.219517	0.198103	-0.148084	0	1	1	no
13103.m06239	LOC_Os03g56980.1	=	transposon protein, putative, unclassified	chr03:32387637-32625406	FAIL	0	0	0	0	1	1	no	FAIL	0	0	0	0	1	1	no	FAIL	0	0	0	0	1	1	no	NOTEST	0	0	0	0	1	1	no
13103.m06241	LOC_Os03g57000.1	=	DNA topoisomerase IV subunit A, putative	chr03:32387637-32625406	FAIL	0.0323936	0	0	0	1	1	no	FAIL	0.0188361	0	0	0	1	1	no	FAIL	0	0.00592105	0	0	1	1	no	NOTEST	0.00859911	0	-1e+300	-1e+300	0.308538	1	no
13103.m06242	LOC_Os03g57010.1	=	conserved hypothetical protein	chr03:32387637-32625406	FAIL	0.314396	0	0	0	1	1	no	FAIL	0.507817	0.33516	0	0	1	1	no	FAIL	0	0.191659	0	0	1	1	no	NOTEST	0.347931	0.502384	0.529988	-0.233721	0.815201	1	no
13103.m06247	LOC_Os03g57050.1	=	expressed protein	chr03:32387637-32625406	FAIL	1.80711	0	0	0	1	1	no	FAIL	0.638994	0.494374	0	0	1	1	no	FAIL	2.06901	1.17545	0	0	1	1	no	NOTEST	1.16688	1.35206	0.212506	-0.158176	0.874318	1	no
13103.m06250	LOC_Os03g57070.1	=	amine oxidase-related, putative, expressed	chr03:32387637-32625406	FAIL	1.61608	0	0	0	1	1	no	FAIL	0.714761	1.01825	0	0	1	1	no	FAIL	0.478247	0.674589	0	0	1	1	no	NOTEST	1.12412	0	-1e+300	-1e+300	0.231245	1	no
13103.m06251	LOC_Os03g57070.4	=	amine oxidase-related, putative, expressed	chr03:32387637-32625406	FAIL	3.88734	0	0	0	1	1	no	FAIL	3.02429	1.34639	0	0	1	1	no	FAIL	0.617366	0.453504	0	0	1	1	no	NOTEST	0.344551	1.35864	1.97937	-0.204375	0.838061	1	no
13103.m06249	LOC_Os03g57070.3	=	amine oxidase-related, putative, expressed	chr03:32387637-32625406	FAIL	0.286735	0	0	0	1	1	no	FAIL	0.863287	2.36846	0	0	1	1	no	FAIL	3.15706	2.14689	0	0	1	1	no	LOWDATA	0.309925	1.71075	2.46464	0	1	1	no
13103.m06255	LOC_Os03g57100.1	=	endoplasmic reticulum-Golgi intermediate compartment protein 3, putative, expressed	chr03:32387637-32625406	FAIL	20.9132	0	0	0	1	1	no	FAIL	19.3485	13.5246	0	0	1	1	no	FAIL	20.2886	26.6732	0	0	1	1	no	OK	24.4063	25.628	0.0704692	-0.0335672	0.973222	1	no
13103.m06265	LOC_Os03g57170.2	=	cell cycle control protein, putative, expressed	chr03:32387637-32625406	FAIL	3.18547	0	0	0	1	1	no	FAIL	5.58076	0.513843	0	0	1	1	no	FAIL	2.22679	3.76098	0	0	1	1	no	LOWDATA	1.25494	0.733331	-0.775078	0	1	1	no
13103.m06266	LOC_Os03g57170.3	=	cell cycle control protein, putative, expressed	chr03:32387637-32625406	FAIL	2.50788	0	0	0	1	1	no	FAIL	0.658124	2.6871	0	0	1	1	no	FAIL	0.393717	2.15942	0	0	1	1	no	LOWDATA	2.97582	3.31564	0.156003	0	1	1	no
13103.m06268	LOC_Os03g57180.1	=	hypothetical protein	chr03:32387637-32625406	FAIL	0.280279	0	0	0	1	1	no	FAIL	0.61116	0	0	0	1	1	no	FAIL	0	0	0	0	1	1	no	NOTEST	0	0	0	0	1	1	no
13103.m06269	LOC_Os03g57190.1	=	TCP family transcription factor, putative, expressed	chr03:32387637-32625406	FAIL	4.19102	0	0	0	1	1	no	FAIL	8.09602	8.65367	0	0	1	1	no	FAIL	3.66449	3.38043	0	0	1	1	no	OK	9.61341	5.72759	-0.747122	1.02137	0.307078	0.982869	no
13103.m06271	LOC_Os03g57210.1	=	glycine-rich protein, putative, expressed	chr03:32387637-32625406	FAIL	16.3166	0	0	0	1	1	no	FAIL	13.8807	12.7809	0	0	1	1	no	FAIL	13.4061	20.7834	0	0	1	1	no	LOWDATA	16.1361	19.4504	0.269509	0	1	1	no
13103.m06274	LOC_Os03g57220.1	=	hydroxyacid oxidase 1, putative, expressed	chr03:32387637-32625406	FAIL	40.194	0	0	0	1	1	no	FAIL	76.2463	55.1461	0	0	1	1	no	FAIL	41.7725	28.1824	0	0	1	1	no	OK	48.4986	116.374	1.26276	-3.00153	0.00268623	0.0530875	no
13103.m06273	LOC_Os03g57220.2	=	hydroxyacid oxidase 1, putative, expressed	chr03:32387637-32625406	FAIL	67.7193	0	0	0	1	1	no	FAIL	95.7993	98.3997	0	0	1	1	no	FAIL	56.5195	51.4347	0	0	1	1	no	OK	73.0133	29.8908	-1.28846	1.70551	0.0880998	0.582023	no
13103.m13017	LOC_Os03g54063.3	=	expressed protein	chr03:30982609-31006827	FAIL	0.413752	0.464556	0	0	1	1	no	NOTEST	0.433781	1.4809	1.77144	-0.217126	0.82811	1	no	LOWDATA	0.124973	0.158942	0.346884	0	1	1	no	LOWDATA	0.54164	0.214211	-1.3383	0	1	1	no
13103.m05923	LOC_Os03g54063.1	=	expressed protein	chr03:30982609-31006827	FAIL	0.280082	0.332999	0	0	1	1	no	LOWDATA	0.323828	0.493586	0.608075	0	1	1	no	LOWDATA	0.226223	0.107193	-1.07754	0	1	1	no	LOWDATA	0.000914099	0.154288	7.39906	0	1	1	no
13103.m13016	LOC_Os03g54063.2	=	expressed protein	chr03:30982609-31006827	FAIL	0.755889	0.827448	0	0	1	1	no	NOTEST	0.671961	0	0	0	1	1	no	LOWDATA	0.428943	0.302764	-0.502595	0	1	1	no	LOWDATA	0.465607	0.418338	-0.154443	0	1	1	no
13103.m06139	LOC_Os03g56310.2	=	5-nucleotidase domain-containing protein, putative, expressed	chr03:32089723-32096990	FAIL	0	7.79525	0	0	1	1	no	FAIL	8.43406	0	0	0	1	1	no	NOTEST	0	0	0	0	1	1	no	NOTEST	0	0	0	0	1	1	no
13103.m06140	LOC_Os03g56310.1	=	5-nucleotidase domain-containing protein, putative, expressed	chr03:32089723-32096990	FAIL	0	8.80944	0	0	1	1	no	FAIL	23.0275	0	0	0	1	1	no	NOTEST	0	0	0	0	1	1	no	NOTEST	0	0	0	0	1	1	no
13103.m06218	LOC_Os03g56869.1	=	ribose-5-phosphate isomerase A, putative, expressed	chr03:32387637-32625406	FAIL	0	0	0	0	1	1	no	FAIL	0	0	0	0	1	1	no	FAIL	0	0	0	0	1	1	no	NOTEST	0	0	0	0	1	1	no
13103.m06220	LOC_Os03g56890.1	=	expressed protein	chr03:32387637-32625406	FAIL	0.125563	0	0	0	1	1	no	FAIL	0	0.133807	0	0	1	1	no	FAIL	0	0.0765163	0	0	1	1	no	NOTEST	0.0555621	0.133712	1.26695	-0.301592	0.762963	1	no
13103.m06222	LOC_Os03g56900.1	=	reticulon domain containing protein, putative, expressed	chr03:32387637-32625406	FAIL	10.8942	0	0	0	1	1	no	FAIL	9.10384	2.39831	0	0	1	1	no	FAIL	1.7791	9.02329	0	0	1	1	no	LOWDATA	9.509	1.39509	-2.76894	0	1	1	no
13103.m06236	LOC_Os03g56960.1	=	PPR repeat domain containing protein, putative, expressed	chr03:32387637-32625406	FAIL	1.0921	0	0	0	1	1	no	FAIL	1.57467	0	0	0	1	1	no	FAIL	0.838377	0.411238	0	0	1	1	no	LOWDATA	0.44493	0.756107	0.765012	0	1	1	no
13103.m06244	LOC_Os03g57030.1	=	hypothetical protein	chr03:32387637-32625406	FAIL	0	0	0	0	1	1	no	FAIL	0	0	0	0	1	1	no	FAIL	0	0.0653029	0	0	1	1	no	NOTEST	0	0	0	0	1	1	no
13103.m06246	LOC_Os03g57040.2	=	clathrin adaptor complex small chain domain containing protein, expressed	chr03:32387637-32625406	FAIL	20.3624	0	0	0	1	1	no	FAIL	21.3398	13.6324	0	0	1	1	no	FAIL	28.6088	18.2091	0	0	1	1	no	LOWDATA	27.0861	22.8559	-0.244984	0	1	1	no
13103.m06254	LOC_Os03g57090.1	=	arv1, putative, expressed	chr03:32387637-32625406	FAIL	0	0	0	0	1	1	no	FAIL	0.728254	0.912923	0	0	1	1	no	FAIL	0	0	0	0	1	1	no	LOWDATA	0.0877688	1.51916	4.11342	0	1	1	no
13103.m06256	LOC_Os03g57110.1	=	expressed protein	chr03:32387637-32625406	FAIL	2.4881	0	0	0	1	1	no	FAIL	3.9781	0	0	0	1	1	no	FAIL	3.80263	10.1269	0	0	1	1	no	LOWDATA	1.12765	5.09699	2.17633	0	1	1	no
13103.m06257	LOC_Os03g57110.2	=	expressed protein	chr03:32387637-32625406	FAIL	2.72715	0	0	0	1	1	no	FAIL	0.3825	4.59456	0	0	1	1	no	FAIL	1.9353	1.43625	0	0	1	1	no	OK	5.30281	4.84497	-0.130271	0.104175	0.91703	1	no
13103.m06259	LOC_Os03g57120.2	=	ferredoxin--NADP reductase, chloroplast precursor, putative, expressed	chr03:32387637-32625406	FAIL	0	0	0	0	1	1	no	FAIL	0	0	0	0	1	1	no	FAIL	0	0.925749	0	0	1	1	no	NOTEST	0	0	0	0	1	1	no
13103.m06258	LOC_Os03g57120.1	=	ferredoxin--NADP reductase, chloroplast precursor, putative, expressed	chr03:32387637-32625406	FAIL	13.8089	0	0	0	1	1	no	FAIL	1.43328	4.38637	0	0	1	1	no	FAIL	11.1218	14.2731	0	0	1	1	no	LOWDATA	4.32262	2.19428	-0.978156	0	1	1	no
13103.m06260	LOC_Os03g57130.1	=	expressed protein	chr03:32387637-32625406	FAIL	9.30885	0	0	0	1	1	no	FAIL	3.92564	7.66941	0	0	1	1	no	FAIL	10.5149	10.7307	0	0	1	1	no	OK	8.14597	14.2906	0.810909	-0.203768	0.838535	1	no
13103.m06264	LOC_Os03g57160.1	=	zinc ion binding protein, putative, expressed	chr03:32387637-32625406	FAIL	7.11193	0	0	0	1	1	no	FAIL	6.28771	4.92588	0	0	1	1	no	FAIL	8.27611	6.9321	0	0	1	1	no	OK	5.71881	6.6491	0.217444	-0.177605	0.859033	1	no
13103.m06417	LOC_Os03g58430.1	=	40S ribosomal protein S15, putative, expressed	chr03:33276859-33286192	FAIL	68.5511	62.3422	0	0	1	1	no	OK	63.0269	46.9907	-0.423592	0.747014	0.455055	0.749719	no	OK	96.4596	59.9123	-0.687073	1.11402	0.265271	0.819558	no	OK	83.9768	60.2447	-0.479156	0.872744	0.382803	1	no
13104.m02001	LOC_Os04g21650.1	=	expressed protein	chr04:12233533-12242170	FAIL	0	0	0	0	1	1	no	NOTEST	0	0	0	0	1	1	no	NOTEST	0.141882	0	-1e+300	-1e+300	0.0216741	1	no	NOTEST	0	0	0	0	1	1	no
13104.m02002	LOC_Os04g21650.2	=	expressed protein	chr04:12233533-12242170	FAIL	0	0	0	0	1	1	no	NOTEST	0	0	0	0	1	1	no	NOTEST	0	0	0	0	1	1	no	NOTEST	0	0	0	0	1	1	no
13104.m03745	LOC_Os04g38870.4	=	14-3-3 protein, putative, expressed	chr04:22918894-22927079	FAIL	5.9622	17.6997	0	0	1	1	no	OK	26.827	21.8511	-0.295979	0.403097	0.686877	0.889806	no	FAIL	26.9276	35.1704	0	0	1	1	no	FAIL	36.3871	43.9075	0	0	1	1	no
13104.m03742	LOC_Os04g38870.1	=	14-3-3 protein, putative, expressed	chr04:22918894-22927079	FAIL	13.9656	13.2117	0	0	1	1	no	OK	1.84518	12.8054	2.79492	-0.372152	0.709779	0.900648	no	FAIL	22.8528	10.563	0	0	1	1	no	FAIL	36.426	17.0071	0	0	1	1	no
13104.m03746	LOC_Os04g38870.5	=	14-3-3 protein, putative, expressed	chr04:22918894-22927079	FAIL	8.23837	8.92687	0	0	1	1	no	OK	6.16319	1.08532	-2.50556	0.317485	0.750876	0.919776	no	FAIL	1.05797	2.86466	0	0	1	1	no	FAIL	2.55114	1.83284	0	0	1	1	no
13104.m03744	LOC_Os04g38870.3	=	14-3-3 protein, putative, expressed	chr04:22918894-22927079	FAIL	1.17775	1.64095	0	0	1	1	no	NOTEST	0	0	0	0	1	1	no	FAIL	1.48755	0.30313	0	0	1	1	no	FAIL	0	1.44607	0	0	1	1	no
13104.m03743	LOC_Os04g38870.2	=	14-3-3 protein, putative, expressed	chr04:22918894-22927079	FAIL	18.4692	0	0	0	1	1	no	OK	20.6726	0	0	0	1	1	no	FAIL	14.0846	0	0	0	1	1	no	FAIL	0	3.78268	0	0	1	1	no
13104.m04594	LOC_Os04g45800.1	=	diacylglycerol kinase, putative, expressed	chr04:26926039-26933351	FAIL	5.13615	5.26658	0	0	1	1	no	NOTEST	3.01106	0	-1e+300	-1e+300	0.000421046	1	no	OK	4.08261	8.92144	1.12778	-1.73072	0.0835024	0.490425	no	OK	5.1782	8.44302	0.705309	-1.19124	0.233558	0.897935	no
13104.m04616	LOC_Os04g45970.2	=	glutamate dehydrogenase protein, putative, expressed	chr04:27048229-27083753	FAIL	0	0	0	0	1	1	no	FAIL	0	0	0	0	1	1	no	FAIL	0.220519	0	0	0	1	1	no	FAIL	0.696122	0	0	0	1	1	no
13104.m04617	LOC_Os04g45970.1	=	glutamate dehydrogenase protein, putative, expressed	chr04:27048229-27083753	FAIL	0	0	0	0	1	1	no	FAIL	0	0	0	0	1	1	no	FAIL	9.49221	0	0	0	1	1	no	FAIL	15.318	0	0	0	1	1	no
13104.m05390	LOC_Os04g52550.1	=	PAZ domain-containing protein, putative, expressed	chr04:31059263-31069021	FAIL	0	0.168557	0	0	1	1	no	NOTEST	0	0	0	0	1	1	no	FAIL	0	0	0	0	1	1	no	NOTEST	0	0	0	0	1	1	no
13104.m01643	LOC_Os04g18010.1	=	cleavage and polyadenylation specificity factor subunit 1, putative, expressed	chr04:9879474-9906954	FAIL	0.818272	0	0	0	1	1	no	NOTEST	1.33125	0	-1e+300	-1e+300	0.0243733	1	no	NOTEST	1.22899	2.08867	0.765108	-0.878278	0.379793	1	no	NOTEST	0.922061	0.667219	-0.466702	0.238767	0.811286	1	no
13104.m01644	LOC_Os04g18010.2	=	cleavage and polyadenylation specificity factor subunit 1, putative, expressed	chr04:9879474-9906954	FAIL	0.361869	0	0	0	1	1	no	NOTEST	0.309231	0.1835	-0.752907	0.0384698	0.969313	1	no	NOTEST	0.0318482	0.0745899	1.22777	-1.06249	0.288012	1	no	NOTEST	0.0152473	0.0492456	1.69144	-1.15024	0.250046	1	no
13104.m01642	LOC_Os04g18010.3	=	cleavage and polyadenylation specificity factor subunit 1, putative, expressed	chr04:9879474-9906954	FAIL	0	0	0	0	1	1	no	NOTEST	0	0	0	0	1	1	no	NOTEST	0	0	0	0	1	1	no	NOTEST	0	0	0	0	1	1	no
13104.m04619	LOC_Os04g45990.1	=	histone-lysine N-methyltransferase, putative, expressed	chr04:27048229-27083753	FAIL	0	0	0	0	1	1	no	FAIL	0	0	0	0	1	1	no	FAIL	5.39998	0	0	0	1	1	no	FAIL	6.636	0	0	0	1	1	no
13104.m04620	LOC_Os04g46000.1	=	cyclin, putative, expressed	chr04:27048229-27083753	FAIL	0	0	0	0	1	1	no	FAIL	0	0	0	0	1	1	no	FAIL	6.28853	0	0	0	1	1	no	FAIL	4.90951	0	0	0	1	1	no
13104.m04621	LOC_Os04g46010.1	=	PPR repeat domain containing protein, putative, expressed	chr04:27048229-27083753	FAIL	0	0	0	0	1	1	no	FAIL	0	0	0	0	1	1	no	FAIL	14.7941	0	0	0	1	1	no	FAIL	24.8817	0	0	0	1	1	no
13104.m04622	LOC_Os04g46020.1	=	GATA zinc finger domain containing protein, expressed	chr04:27048229-27083753	FAIL	0	0	0	0	1	1	no	FAIL	0	0	0	0	1	1	no	FAIL	7.47701	0	0	0	1	1	no	FAIL	8.04265	0	0	0	1	1	no
13104.m05391	LOC_Os04g52560.1	=	transposon protein, putative, unclassified, expressed	chr04:31059263-31069021	FAIL	0	0.996762	0	0	1	1	no	NOTEST	0	0	0	0	1	1	no	FAIL	0	0	0	0	1	1	no	NOTEST	0	0.965452	1e+300	1e+300	0.00289091	1	no
13105.m00295	LOC_Os05g03120.2	=	retrotransposon protein, putative, unclassified, expressed	chr05:1240282-1258812	FAIL	0	0	0	0	1	1	no	NOTEST	0	0	0	0	1	1	no	FAIL	0	0	0	0	1	1	no	NOTEST	0	0	0	0	1	1	no
13105.m00293	LOC_Os05g03120.1	=	retrotransposon protein, putative, unclassified, expressed	chr05:1240282-1258812	FAIL	0	0	0	0	1	1	no	NOTEST	0	0	0	0	1	1	no	FAIL	0	0	0	0	1	1	no	NOTEST	0	0	0	0	1	1	no
13105.m00294	LOC_Os05g03120.3	=	retrotransposon protein, putative, unclassified, expressed	chr05:1240282-1258812	FAIL	0	0	0	0	1	1	no	NOTEST	0	0	0	0	1	1	no	FAIL	0	0	0	0	1	1	no	NOTEST	0	0	0	0	1	1	no
13105.m00376	LOC_Os05g03820.3	=	glutamate--cysteine ligase, chloroplast precursor, putative, expressed	chr05:1698405-1703144	FAIL	0.701979	1.78282	0	0	1	1	no	NOTEST	1.0522	0.912352	-0.205741	0.281968	0.777968	1	no	NOTEST	0.463465	0.627892	0.438057	-0.489715	0.624335	1	no	NOTEST	0	0	0	0	1	1	no
13105.m00374	LOC_Os05g03820.1	=	glutamate--cysteine ligase, chloroplast precursor, putative, expressed	chr05:1698405-1703144	FAIL	13.6925	20.8055	0	0	1	1	no	OK	17.3199	5.86567	-1.56206	2.71529	0.00662176	0.0762008	no	OK	6.85243	17.712	1.37004	-2.10476	0.0353126	0.296918	no	OK	17.0727	18.1207	0.0859508	-0.152698	0.878636	1	no
13105.m00375	LOC_Os05g03820.2	=	glutamate--cysteine ligase, chloroplast precursor, putative, expressed	chr05:1698405-1703144	FAIL	4.00593	3.90187	0	0	1	1	no	OK	6.72577	5.85766	-0.199374	0.336349	0.736608	0.912865	no	OK	10.0522	11.7695	0.227538	-0.350345	0.72608	1	no	OK	9.25802	6.60046	-0.488136	0.806978	0.419679	1	no
13105.m03031	LOC_Os05g29760.2	=	ferrochelatase-2, chloroplast precursor, putative, expressed	chr05:17149211-17156417	FAIL	10.2897	11.6308	0	0	1	1	no	OK	13.9039	12.4025	-0.164859	0.292527	0.769884	0.928595	no	OK	6.17325	6.82378	0.144539	-0.142195	0.886926	1	no	OK	10.1318	8.42868	-0.265515	0.319277	0.749516	1	no
13105.m03028	LOC_Os05g29760.3	=	ferrochelatase-2, chloroplast precursor, putative, expressed	chr05:17149211-17156417	FAIL	2.32607	0.924341	0	0	1	1	no	NOTEST	2.77337	0	-1e+300	-1e+300	0.000423396	1	no	OK	5.2826	4.50342	-0.230229	0.220698	0.825328	1	no	OK	0	5.95454	1e+300	1e+300	0.0537526	0.443081	no
13105.m03027	LOC_Os05g29760.1	=	ferrochelatase-2, chloroplast precursor, putative, expressed	chr05:17149211-17156417	FAIL	6.01202	6.9624	0	0	1	1	no	OK	7.91546	4.08359	-0.954836	1.61195	0.106972	0.391188	no	NOTEST	1.09563	1.78608	0.70503	-0.156664	0.87551	1	no	OK	5.78645	0.66092	-3.13013	0.384437	0.700654	1	no
13105.m00283	LOC_Os05g03040.2	=	AP2 domain containing protein, expressed	chr05:1155949-1160309	FAIL	1.58022	2.45244	0	0	1	1	no	LOWDATA	2.36251	0.650512	-1.86067	0	1	1	no	LOWDATA	2.27703	2.0029	-0.18506	0	1	1	no	LOWDATA	0.7778	2.09983	1.4328	0	1	1	no
13105.m00282	LOC_Os05g03040.1	=	AP2 domain containing protein, expressed	chr05:1155949-1160309	FAIL	59.3937	58.9143	0	0	1	1	no	OK	58.2677	48.782	-0.256348	0.458693	0.646455	0.866968	no	OK	42.2923	45.9366	0.119249	-0.192472	0.847373	1	no	OK	59.6198	73.9014	0.309811	-0.617559	0.536866	1	no
13106.m00728	LOC_Os06g07010.2	=	transposon protein, putative, unclassified, expressed	chr06:3321906-3326647	FAIL	0.644897	0.29423	0	0	1	1	no	FAIL	0.143929	0.230994	0	0	1	1	no	FAIL	0.0924454	0.1815	0	0	1	1	no	NOTEST	0	0	0	0	1	1	no
13106.m00729	LOC_Os06g07010.1	=	transposon protein, putative, unclassified, expressed	chr06:3321906-3326647	FAIL	1.64295	0.0759733	0	0	1	1	no	FAIL	0.00390325	0.00638615	0	0	1	1	no	FAIL	0.00234625	0.0103605	0	0	1	1	no	NOTEST	0	0	0	0	1	1	no
13106.m00992	LOC_Os06g09280.1	=	ATP-dependent RNA helicase, putative, expressed	chr06:4658377-4666146	FAIL	0.633154	0	0	0	1	1	no	NOTEST	0.602874	0.893201	0.567129	-0.794982	0.426624	1	no	OK	2.47506	3.04752	0.30017	-0.418424	0.675637	1	no	NOTEST	0.631275	0.620749	-0.0242578	0.0294989	0.976467	1	no
13106.m02365	LOC_Os06g22060.1	=	pyrophosphate--fructose 6-phosphate 1-phosphotransferase subunit alpha, putative, expressed	chr06:12793242-12799361	FAIL	4.40185	3.37851	0	0	1	1	no	OK	3.44767	15.0212	2.1233	-3.62001	0.000294588	0.00916597	yes	FAIL	1.72909	2.45384	0	0	1	1	no	OK	3.40727	9.34375	1.45538	-2.20262	0.0276218	0.290001	no
13106.m02369	LOC_Os06g22060.3	=	pyrophosphate--fructose 6-phosphate 1-phosphotransferase subunit alpha, putative, expressed	chr06:12793242-12799361	FAIL	0.721266	0.750408	0	0	1	1	no	NOTEST	1.10069	0.372892	-1.56158	0.0981951	0.921777	1	no	FAIL	1.07769	0.726012	0	0	1	1	no	NOTEST	1.00289	1.10039	0.133851	-0.154402	0.877293	1	no
13106.m02368	LOC_Os06g22060.2	=	pyrophosphate--fructose 6-phosphate 1-phosphotransferase subunit alpha, putative, expressed	chr06:12793242-12799361	FAIL	3.60227	5.12363	0	0	1	1	no	OK	4.04266	1.91361	-1.07901	0.339264	0.734411	0.912307	no	FAIL	2.7759	3.80589	0	0	1	1	no	OK	4.09219	4.43776	0.116959	-0.174603	0.861391	1	no
13106.m02453	LOC_Os06g22829.1	=	expressed protein	chr06:13313350-13317311	FAIL	0	0	0	0	1	1	no	FAIL	0.0587429	0.147395	0	0	1	1	no	NOTEST	0	0	0	0	1	1	no	NOTEST	0	0.127257	1e+300	1e+300	0.0431057	1	no
13106.m10540	LOC_Os06g22829.3	=	expressed protein	chr06:13313350-13317311	FAIL	1.24412	0.973906	0	0	1	1	no	FAIL	0.87844	0	0	0	1	1	no	NOTEST	0	0	0	0	1	1	no	NOTEST	0	0	0	0	1	1	no
13106.m02454	LOC_Os06g22829.2	=	expressed protein	chr06:13313350-13317311	FAIL	0	0	0	0	1	1	no	FAIL	0	0.773726	0	0	1	1	no	NOTEST	0	0	0	0	1	1	no	NOTEST	0	0.540503	1e+300	1e+300	0.0313985	1	no
13107.m01119	LOC_Os07g10910.1	=	ATEXO70F1, putative, expressed	chr07:5971075-5978170	FAIL	0	0	0	0	1	1	no	NOTEST	1.73032	0.510914	-1.75989	2.65918	0.00783308	1	no	FAIL	0.661051	0	0	0	1	1	no	FAIL	0	0	0	0	1	1	no
13107.m01120	LOC_Os07g10910.2	=	ATEXO70F1, putative, expressed	chr07:5971075-5978170	FAIL	0	0	0	0	1	1	no	NOTEST	0.693605	0.256062	-1.43762	1.81643	0.0693039	1	no	FAIL	0.252205	0	0	0	1	1	no	FAIL	0	0	0	0	1	1	no
13107.m09957	LOC_Os07g31599.2	=	expressed protein	chr07:18760293-18762732	FAIL	0.108686	0.13855	0	0	1	1	no	NOTEST	0.108192	0.176595	0.706849	-0.0108995	0.991304	1	no	NOTEST	0.401773	0.183674	-1.12923	0.0489745	0.96094	1	no	NOTEST	0.281534	0.137241	-1.0366	0.0275496	0.978021	1	no
13107.m03200	LOC_Os07g31599.1	=	expressed protein	chr07:18760293-18762732	FAIL	4.11192	6.48476	0	0	1	1	no	OK	9.72678	1.68433	-2.52979	0.868344	0.385206	0.700171	no	LOWDATA	0.790083	0.838323	0.0855014	0	1	1	no	NOTEST	0.7712	1.97339	1.3555	-0.559053	0.576126	1	no
13107.m10006	LOC_Os07g31599.3	=	expressed protein	chr07:18760293-18762732	FAIL	5.11368	2.87055	0	0	1	1	no	OK	2.88422	10.9927	1.93029	-0.829552	0.406792	0.716953	no	OK	5.46172	5.7362	0.070741	-0.0694424	0.944637	1	no	OK	12.1942	9.44049	-0.369266	0.514791	0.606699	1	no
13107.m04758	LOC_Os07g45160.1	=	SAC3/GANP family protein, expressed	chr07:26951293-26966202	FAIL	0	0	0	0	1	1	no	NOTEST	0	0	0	0	1	1	no	FAIL	0.15912	0	0	0	1	1	no	NOTEST	0	0	0	0	1	1	no
13107.m01148	LOC_Os07g11150.2	=	expressed protein	chr07:6145970-6151550	FAIL	2.55753	0	0	0	1	1	no	NOTEST	0.186938	0.0585252	-1.67543	1.7183	0.0857412	1	no	NOTEST	0.981418	1.96077	0.998482	-1.30618	0.191493	1	no	NOTEST	0	0	0	0	1	1	no
13107.m01147	LOC_Os07g11150.1	=	expressed protein	chr07:6145970-6151550	FAIL	0.778249	0	0	0	1	1	no	NOTEST	0	0	0	0	1	1	no	NOTEST	0.163737	0.186714	0.189446	-0.19127	0.848314	1	no	NOTEST	0	0	0	0	1	1	no
13107.m01149	LOC_Os07g11150.3	=	expressed protein	chr07:6145970-6151550	FAIL	0.434288	0	0	0	1	1	no	NOTEST	0	0	0	0	1	1	no	NOTEST	0.151479	0	-1e+300	-1e+300	0.0204263	1	no	NOTEST	0	0	0	0	1	1	no
13107.m01712	LOC_Os07g16370.1	=	transposon protein, putative, CACTA, En/Spm sub-class, expressed	chr07:9566239-9572391	FAIL	1.73817	0	0	0	1	1	no	FAIL	0.0279581	0	0	0	1	1	no	FAIL	1.08312	0	0	0	1	1	no	FAIL	0	7.00151	0	0	1	1	no
13107.m01713	LOC_Os07g16370.2	=	transposon protein, putative, CACTA, En/Spm sub-class, expressed	chr07:9566239-9572391	FAIL	1.34367	0	0	0	1	1	no	FAIL	5.61573	0	0	0	1	1	no	FAIL	2.18604	0	0	0	1	1	no	FAIL	0	0	0	0	1	1	no
13107.m01711	LOC_Os07g16370.3	=	transposon protein, putative, CACTA, En/Spm sub-class, expressed	chr07:9566239-9572391	FAIL	0.556458	0	0	0	1	1	no	FAIL	0	0	0	0	1	1	no	FAIL	0.364354	0	0	0	1	1	no	FAIL	0	0	0	0	1	1	no
13107.m02778	LOC_Os07g27790.1	=	glutamate--cysteine ligase, chloroplast precursor, putative, expressed	chr07:16212456-16217087	FAIL	16.7063	22.6435	0	0	1	1	no	FAIL	18.6463	13.546	0	0	1	1	no	OK	15.5484	12.9577	-0.262956	0.407331	0.683765	1	no	FAIL	19.8243	23.1726	0	0	1	1	no
13107.m04759	LOC_Os07g45170.1	=	protein phosphatase 2C, putative, expressed	chr07:26951293-26966202	FAIL	0.18328	0.21725	0	0	1	1	no	NOTEST	0	0	0	0	1	1	no	FAIL	0	0	0	0	1	1	no	NOTEST	0	0.369825	1e+300	1e+300	0.388052	1	no
13108.m01544	LOC_Os08g14450.1	=	RNA polymerase sigma factor, putative, expressed	chr08:8676892-8707992	FAIL	18.9825	13.9027	0	0	1	1	no	OK	23.5713	15.0807	-0.64433	1.30342	0.192432	0.514194	no	OK	14.3851	10.2687	-0.486326	0.697413	0.485545	0.976667	no	OK	19.0733	14.5104	-0.394467	0.696542	0.48609	1	no
13108.m01548	LOC_Os08g14470.1	=	transposon protein, putative, unclassified	chr08:8676892-8707992	FAIL	0.000235638	0.000627783	0	0	1	1	no	NOTEST	0.00214498	0	-1e+300	-1e+300	0.356307	1	no	NOTEST	0	0	0	0	1	1	no	NOTEST	0	0	0	0	1	1	no
13108.m01550	LOC_Os08g14490.1	=	dehydrogenase-phosphopantetheinyltransferase, putative, expressed	chr08:8676892-8707992	FAIL	3.46908	3.89224	0	0	1	1	no	OK	3.80617	2.40322	-0.663374	0.771491	0.440416	0.739563	no	OK	3.83033	3.46726	-0.143674	0.0430834	0.965635	1	no	OK	5.17204	2.54806	-1.02133	0.0990012	0.921137	1	no
13108.m03254	LOC_Os08g31410.4	=	sulfate transporter, putative, expressed	chr08:19424706-19429995	FAIL	1.1999	0.139227	0	0	1	1	no	FAIL	0	0	0	0	1	1	no	NOTEST	0	1.18155	1e+300	1e+300	0.00521312	1	no	FAIL	0	0	0	0	1	1	no
13108.m03256	LOC_Os08g31410.6	=	sulfate transporter, putative, expressed	chr08:19424706-19429995	FAIL	1.8532	0	0	0	1	1	no	FAIL	0	1.25937	0	0	1	1	no	NOTEST	0	1.83077	1e+300	1e+300	0.00431215	1	no	FAIL	0	0	0	0	1	1	no
13108.m03255	LOC_Os08g31410.5	=	sulfate transporter, putative, expressed	chr08:19424706-19429995	FAIL	3.58294	0.0353647	0	0	1	1	no	FAIL	0	0	0	0	1	1	no	NOTEST	0	0	0	0	1	1	no	FAIL	0	0	0	0	1	1	no
13108.m03253	LOC_Os08g31410.3	=	sulfate transporter, putative, expressed	chr08:19424706-19429995	FAIL	1.25427	10.4798	0	0	1	1	no	FAIL	0	0	0	0	1	1	no	NOTEST	0	0	0	0	1	1	no	FAIL	0	0	0	0	1	1	no
13108.m00897	LOC_Os08g08592.1	=	expressed protein	chr08:4970048-4972857	FAIL	1.4461	0.728937	0	0	1	1	no	LOWDATA	0	0	0	0	1	1	no	NOTEST	0	0	0	0	1	1	no	LOWDATA	0	0	0	0	1	1	no
13108.m00896	LOC_Os08g08592.2	=	expressed protein	chr08:4970048-4972857	FAIL	0.421683	2.88244	0	0	1	1	no	LOWDATA	0	0	0	0	1	1	no	NOTEST	0	0	0	0	1	1	no	LOWDATA	0	0	0	0	1	1	no
13108.m01545	LOC_Os08g14460.2	=	expressed protein	chr08:8676892-8707992	FAIL	1.25888	0	0	0	1	1	no	NOTEST	1.40781	0	-1e+300	-1e+300	0.310315	1	no	OK	2.61866	2.3434	-0.160225	0.194334	0.845914	1	no	OK	4.00923	3.61744	-0.148356	0.207663	0.835492	1	no
13108.m01546	LOC_Os08g14460.3	=	expressed protein	chr08:8676892-8707992	FAIL	0.99386	2.4197	0	0	1	1	no	OK	4.08122	1.73103	-1.23737	1.03413	0.301078	0.63003	no	NOTEST	0	0	0	0	1	1	no	NOTEST	0	0	0	0	1	1	no
13109.m00802	LOC_Os09g09360.1	=	esterase/lipase/thioesterase, putative, expressed	chr09:5005853-5019013	FAIL	3.5797	3.88237	0	0	1	1	no	OK	4.22726	0.477593	-3.14587	0.653904	0.513174	0.787049	no	OK	4.99644	6.3753	0.351591	-0.540393	0.588926	1	no	OK	7.41235	5.60684	-0.402742	0.695993	0.486433	1	no
13109.m00598	LOC_Os09g07500.2	=	expressed protein	chr09:3748782-3763950	FAIL	6.25995	7.2861	0	0	1	1	no	FAIL	5.88291	1.21291	0	0	1	1	no	FAIL	5.33323	5.58278	0	0	1	1	no	FAIL	5.70462	2.30631	0	0	1	1	no
13109.m07537	LOC_Os09g07500.3	=	expressed protein	chr09:3748782-3763950	FAIL	3.5434	4.00317	0	0	1	1	no	FAIL	4.10483	3.14596	0	0	1	1	no	FAIL	3.09271	5.60892	0	0	1	1	no	FAIL	3.88161	6.90406	0	0	1	1	no
13109.m00600	LOC_Os09g07510.1	=	HEAT repeat family protein, putative, expressed	chr09:3748782-3763950	FAIL	5.867	7.15672	0	0	1	1	no	FAIL	0.322062	11.7444	0	0	1	1	no	FAIL	9.1287	23.9078	0	0	1	1	no	FAIL	3.34383	0.502518	0	0	1	1	no
13109.m00601	LOC_Os09g07510.2	=	HEAT repeat family protein, putative, expressed	chr09:3748782-3763950	FAIL	19.0189	19.0129	0	0	1	1	no	FAIL	15.5556	8.86356	0	0	1	1	no	FAIL	23.6888	13.3455	0	0	1	1	no	FAIL	22.1694	31.4694	0	0	1	1	no
13109.m00602	LOC_Os09g07510.3	=	HEAT repeat family protein, putative, expressed	chr09:3748782-3763950	FAIL	6.12785	5.73731	0	0	1	1	no	FAIL	24.8572	2.80598	0	0	1	1	no	FAIL	6.38701	9.61831	0	0	1	1	no	FAIL	25.5608	11.6705	0	0	1	1	no
13110.m01034	LOC_Os10g11354.1	=	MATE efflux family protein, putative, expressed	chr10:6311367-6317410	FAIL	4.1148	16.5299	0	0	1	1	no	NOTEST	3.40769	0	-1e+300	-1e+300	0.000476878	1	no	OK	5.81421	14.9923	1.36656	-2.05589	0.0397936	0.31985	no	OK	1.13717	5.96793	2.39178	-3.27472	0.00105766	0.0269329	yes
13110.m03126	LOC_Os10g35000.1	=	G-patch domain containing protein, expressed	chr10:18595626-18631118	FAIL	16.4129	12.5884	0	0	1	1	no	FAIL	0	16.4246	0	0	1	1	no	FAIL	0	0	0	0	1	1	no	FAIL	0	13.6634	0	0	1	1	no
13110.m03131	LOC_Os10g35040.1	=	receptor kinase like protein, putative	chr10:18595626-18631118	FAIL	5.65141	5.30865	0	0	1	1	no	FAIL	1.43467	6.83327	0	0	1	1	no	FAIL	5.31183	6.00587	0	0	1	1	no	FAIL	10.0432	10.2316	0	0	1	1	no
13110.m03132	LOC_Os10g35050.1	=	aquaporin protein, putative, expressed	chr10:18595626-18631118	FAIL	0.56687	5.82031	0	0	1	1	no	FAIL	0.889979	6.77708	0	0	1	1	no	FAIL	0.482982	4.78729	0	0	1	1	no	FAIL	0.993221	12.4581	0	0	1	1	no
13110.m03212	LOC_Os10g35690.1	=	ribosomal protein S18 containing protein, expressed	chr10:19007216-19029256	FAIL	12.2525	15.4228	0	0	1	1	no	FAIL	12.352	0	0	0	1	1	no	LOWDATA	14.7153	13.5822	-0.115602	0	1	1	no	LOWDATA	16.9412	15.7258	-0.107402	0	1	1	no
13110.m03214	LOC_Os10g35710.2	=	expressed protein	chr10:19007216-19029256	FAIL	8.34791	2.71905	0	0	1	1	no	FAIL	1.91959	0	0	0	1	1	no	LOWDATA	1.77056	0.0232655	-6.24987	0	1	1	no	NOTEST	0.0361853	0.0798055	1.14109	-0.00598804	0.995222	1	no
13110.m03213	LOC_Os10g35710.1	=	expressed protein	chr10:19007216-19029256	FAIL	6.21027	10.2097	0	0	1	1	no	FAIL	14.6909	0	0	0	1	1	no	LOWDATA	7.15705	18.4997	1.37006	0	1	1	no	OK	18.7173	19.5096	0.0598167	-0.127957	0.898183	1	no
13110.m03217	LOC_Os10g35710.5	=	expressed protein	chr10:19007216-19029256	FAIL	0	0	0	0	1	1	no	FAIL	0.869765	0	0	0	1	1	no	OK	4.6061	0	0	0	1	1	no	NOTEST	0	0	0	0	1	1	no
13110.m03218	LOC_Os10g35720.1	=	OsGrx_S17 - glutaredoxin subgroup II, expressed	chr10:19007216-19029256	FAIL	15.5136	24.1769	0	0	1	1	no	FAIL	18.8758	0	0	0	1	1	no	LOWDATA	15.6619	22.3079	0.5103	0	1	1	no	OK	19.9436	27.03	0.438636	-0.844007	0.398666	1	no
13110.m03219	LOC_Os10g35720.2	=	OsGrx_S17 - glutaredoxin subgroup II, expressed	chr10:19007216-19029256	FAIL	0	0	0	0	1	1	no	FAIL	0	0	0	0	1	1	no	NOTEST	0	0	0	0	1	1	no	NOTEST	0	0	0	0	1	1	no
13110.m03261	LOC_Os10g36100.1	=	LTPL157 - Protease inhibitor/seed storage/LTP family protein precursor, expressed	chr10:19228038-19264175	FAIL	9.79646	29.7294	0	0	1	1	no	NOTEST	1.24118	3.14171	1.33984	-1.35934	0.174039	1	no	OK	6.3127	15.8487	1.32804	-0.10497	0.916399	1	no	OK	2.86854	6.5009	1.18032	-0.0175985	0.985959	1	no
13110.m03265	LOC_Os10g36140.1	=	retrotransposon protein, putative, unclassified	chr10:19228038-19264175	FAIL	0	0	0	0	1	1	no	NOTEST	0	0	0	0	1	1	no	NOTEST	0	0	0	0	1	1	no	NOTEST	0	0	0	0	1	1	no
13110.m03127	LOC_Os10g35010.1	=	ATTIC110/TIC110, putative, expressed	chr10:18595626-18631118	FAIL	7.18478	7.68028	0	0	1	1	no	FAIL	9.56695	3.67871	0	0	1	1	no	FAIL	4.09523	4.94463	0	0	1	1	no	FAIL	8.07616	6.09556	0	0	1	1	no
13110.m07880	LOC_Os10g35020.2	=	glycosyltransferase, putative, expressed	chr10:18595626-18631118	FAIL	8.64328	1.08203	0	0	1	1	no	FAIL	2.30435	8.42117	0	0	1	1	no	FAIL	6.51221	4.43455	0	0	1	1	no	FAIL	5.97681	0.878483	0	0	1	1	no
13110.m03128	LOC_Os10g35020.1	=	glycosyltransferase, putative, expressed	chr10:18595626-18631118	FAIL	0.456857	6.83654	0	0	1	1	no	FAIL	4.54513	0	0	0	1	1	no	FAIL	1.08018	2.28746	0	0	1	1	no	FAIL	0	7.29997	0	0	1	1	no
13110.m07881	LOC_Os10g35030.3	=	IAP100, putative, expressed	chr10:18595626-18631118	FAIL	1.88572	0	0	0	1	1	no	FAIL	45.8909	0	0	0	1	1	no	FAIL	20.9128	1.58894	0	0	1	1	no	FAIL	1.15483	0	0	0	1	1	no
13110.m03129	LOC_Os10g35030.2	=	IAP100, putative, expressed	chr10:18595626-18631118	FAIL	0	0	0	0	1	1	no	FAIL	0	0	0	0	1	1	no	FAIL	0	0	0	0	1	1	no	FAIL	0	0	0	0	1	1	no
13110.m03130	LOC_Os10g35030.1	=	IAP100, putative, expressed	chr10:18595626-18631118	FAIL	45.2177	14.6373	0	0	1	1	no	FAIL	23.4476	14.4629	0	0	1	1	no	FAIL	19.9155	8.52451	0	0	1	1	no	FAIL	52.0419	18.4417	0	0	1	1	no
13110.m03262	LOC_Os10g36110.1	=	LTPL158 - Protease inhibitor/seed storage/LTP family protein precursor, expressed	chr10:19228038-19264175	FAIL	0.458093	0.315585	0	0	1	1	no	NOTEST	1.10988	0.569559	-0.962483	1.18491	0.236054	1	no	NOTEST	0.469885	0.325698	-0.528775	0.202091	0.839846	1	no	NOTEST	1.14874	0.487847	-1.23555	0.575318	0.565076	1	no
13110.m03263	LOC_Os10g36130.1	=	hypothetical protein	chr10:19228038-19264175	FAIL	0	0	0	0	1	1	no	NOTEST	0	0	0	0	1	1	no	NOTEST	0	0	0	0	1	1	no	NOTEST	0	0	0	0	1	1	no
13110.m03264	LOC_Os10g36134.1	=	retrotransposon protein, putative, unclassified	chr10:19228038-19264175	FAIL	0	0	0	0	1	1	no	NOTEST	0.000885771	0	-1e+300	-1e+300	0.48892	1	no	NOTEST	0	0	0	0	1	1	no	NOTEST	0	0	0	0	1	1	no
13110.m03266	LOC_Os10g36150.1	=	retrotransposon protein, putative, unclassified	chr10:19228038-19264175	FAIL	0	0.0044977	0	0	1	1	no	NOTEST	0.00105452	0.00154577	0.551734	-0.0254955	0.97966	1	no	NOTEST	0	0	0	0	1	1	no	NOTEST	0	0	0	0	1	1	no
13110.m03267	LOC_Os10g36160.1	=	LTPL159 - Protease inhibitor/seed storage/LTP family protein precursor, expressed	chr10:19228038-19264175	FAIL	8.29109	7.17766	0	0	1	1	no	OK	11.1588	6.12768	-0.864764	0.378044	0.705398	0.898524	no	OK	10.5977	5.82739	-0.862832	0.271648	0.785893	1	no	OK	12.9392	4.58364	-1.49718	0.922057	0.356499	1	no
13110.m03268	LOC_Os10g36170.1	=	LTPL160 - Protease inhibitor/seed storage/LTP family protein precursor, expressed	chr10:19228038-19264175	FAIL	21.1335	36.5715	0	0	1	1	no	OK	34.2097	102.668	1.58551	-2.42247	0.0154153	0.130853	no	LOWDATA	43.1654	29.439	-0.552145	0	1	1	no	OK	35.7393	71.8716	1.00791	-2.06269	0.0391425	0.368432	no
13110.m03782	LOC_Os10g40780.1	=	CCR4-Not complex component, Not1domain containing protein, expressed	chr10:21812872-21832248	FAIL	0	0	0	0	1	1	no	FAIL	0	0.649179	0	0	1	1	no	NOTEST	0	0	0	0	1	1	no	FAIL	0	0	0	0	1	1	no
13110.m03781	LOC_Os10g40780.3	=	CCR4-Not complex component, Not1domain containing protein, expressed	chr10:21812872-21832248	FAIL	0	0	0	0	1	1	no	FAIL	0	0	0	0	1	1	no	NOTEST	0	0	0	0	1	1	no	FAIL	0	0	0	0	1	1	no
13111.m01276	LOC_Os11g12050.2	=	NBS-LRR type disease resistance protein, putative, expressed	chr11:6698872-6704990	FAIL	0	0	0	0	1	1	no	NOTEST	0	0	0	0	1	1	no	NOTEST	0	0	0	0	1	1	no	LOWDATA	0	0	5.32571e-315	0	1	1	no
13111.m01275	LOC_Os11g12050.1	=	NBS-LRR type disease resistance protein, putative, expressed	chr11:6698872-6704990	FAIL	0	0	0	0	1	1	no	NOTEST	0	0	0	0	1	1	no	NOTEST	0	0	0	0	1	1	no	LOWDATA	0	0	0	0	1	1	no
13111.m03952	LOC_Os11g39990.1	=	patatin, putative, expressed	chr11:23378403-23394750	FAIL	13.772	12.7916	0	0	1	1	no	OK	7.19345	3.33022	-1.11106	1.81285	0.0698544	0.310584	no	OK	13.5766	12.1217	-0.163534	0.251113	0.801727	1	no	OK	10.7722	10.106	-0.0921069	0.149827	0.880901	1	no
13111.m03954	LOC_Os11g40009.2	=	phospholipase, patatin family, putative, expressed	chr11:23378403-23394750	FAIL	2.96237	3.00319	0	0	1	1	no	NOTEST	0.795763	0.495114	-0.684578	0.240195	0.810179	1	no	OK	4.77796	1.9487	-1.29389	0.873981	0.382129	0.921128	no	NOTEST	0.630139	0.740397	0.23263	-0.0322183	0.974298	1	no
13111.m03953	LOC_Os11g40009.1	=	phospholipase, patatin family, putative, expressed	chr11:23378403-23394750	FAIL	0.470876	0	0	0	1	1	no	NOTEST	0	0	0	0	1	1	no	LOWDATA	0.0388372	0.0712921	0.876305	0	1	1	no	NOTEST	0	0	0	0	1	1	no
13112.m03978	LOC_Os12g38590.1	=	pumilio-family RNA binding repeat containing protein, expressed	chr12:23668000-23686141	FAIL	0	1.60564	0	0	1	1	no	OK	0	4.42172	1e+300	1e+300	0.00025972	0.00851388	yes	FAIL	0	0	0	0	1	1	no	FAIL	0	0	0	0	1	1	no
13112.m03000	LOC_Os12g29520.4	=	auxin response factor, putative, expressed	chr12:17565491-17571851	FAIL	4.95792	8.73326	0	0	1	1	no	OK	8.65839	5.83333	-0.569778	1.00662	0.314117	0.641068	no	OK	7.81501	6.35953	-0.297327	0.461292	0.644589	1	no	FAIL	11.3352	5.2685	0	0	1	1	no
13112.m03001	LOC_Os12g29520.3	=	auxin response factor, putative, expressed	chr12:17565491-17571851	FAIL	6.28017	7.04304	0	0	1	1	no	OK	11.7335	8.59952	-0.448302	0.807283	0.419503	0.725947	no	OK	4.93473	6.84455	0.471985	-0.716644	0.473594	0.970075	no	FAIL	7.3139	7.97437	0	0	1	1	no
13112.m03980	LOC_Os12g38610.1	=	lectin-like receptor kinase, putative, expressed	chr12:23668000-23686141	FAIL	0	6.1965	0	0	1	1	no	LOWDATA	0.776611	0.391739	-0.987302	0	1	1	no	FAIL	0	0	0	0	1	1	no	FAIL	0	0	0	0	1	1	no
13101.m14919	LOC_Os01g57968.1	=	expressed protein	chr01:33530894-33532660	HIDATA	0	0	0	0	1	1	no	HIDATA	0	0	0	0	1	1	no	HIDATA	0	0	0	0	1	1	no	OK	16364.4	14865.2	-0.138623	0.3126	0.754585	1	no
13105.m00235	LOC_Os05g02650.1	=	expressed protein	chr05:915584-1002819	HIDATA	0	0	0	0	1	1	no	HIDATA	0	0	0	0	1	1	no	HIDATA	0	0	0	0	1	1	no	FAIL	2.38656	0	0	0	1	1	no
13105.m00238	LOC_Os05g02670.3	=	kinesin motor domain containing protein, putative, expressed	chr05:915584-1002819	HIDATA	0	0	0	0	1	1	no	HIDATA	0	0	0	0	1	1	no	HIDATA	0	0	0	0	1	1	no	FAIL	3.65327	5.24769	0	0	1	1	no
13105.m00236	LOC_Os05g02670.1	=	kinesin motor domain containing protein, putative, expressed	chr05:915584-1002819	HIDATA	0	0	0	0	1	1	no	HIDATA	0	0	0	0	1	1	no	HIDATA	0	0	0	0	1	1	no	FAIL	3.99224	0	0	0	1	1	no
13105.m00237	LOC_Os05g02670.2	=	kinesin motor domain containing protein, putative, expressed	chr05:915584-1002819	HIDATA	0	0	0	0	1	1	no	HIDATA	0	0	0	0	1	1	no	HIDATA	0	0	0	0	1	1	no	FAIL	0	0	0	0	1	1	no
13105.m00239	LOC_Os05g02659.1	=	hypothetical protein	chr05:915584-1002819	HIDATA	0	0	0	0	1	1	no	HIDATA	0	0	0	0	1	1	no	HIDATA	0	0	0	0	1	1	no	FAIL	6.05157	7.82336	0	0	1	1	no
13105.m00242	LOC_Os05g02700.1	=	expressed protein	chr05:915584-1002819	HIDATA	0	0	0	0	1	1	no	HIDATA	0	0	0	0	1	1	no	HIDATA	0	0	0	0	1	1	no	FAIL	0	0.0426164	0	0	1	1	no
13105.m00248	LOC_Os05g02754.1	=	expressed protein	chr05:915584-1002819	HIDATA	0	0	0	0	1	1	no	HIDATA	0	0	0	0	1	1	no	HIDATA	0	0	0	0	1	1	no	FAIL	7.65009	29.4799	0	0	1	1	no
13105.m00249	LOC_Os05g02760.1	=	expressed protein	chr05:915584-1002819	HIDATA	0	0	0	0	1	1	no	HIDATA	0	0	0	0	1	1	no	HIDATA	0	0	0	0	1	1	no	FAIL	2.2533	6.98368	0	0	1	1	no
13105.m00250	LOC_Os05g02770.1	=	glycine-rich cell wall structural protein precursor, putative, expressed	chr05:915584-1002819	HIDATA	0	0	0	0	1	1	no	HIDATA	0	0	0	0	1	1	no	HIDATA	0	0	0	0	1	1	no	FAIL	4.13147	13.0782	0	0	1	1	no
13105.m00253	LOC_Os05g02780.2	=	glycine-rich protein A3, putative, expressed	chr05:915584-1002819	HIDATA	0	0	0	0	1	1	no	HIDATA	0	0	0	0	1	1	no	HIDATA	0	0	0	0	1	1	no	FAIL	52.9634	67.3032	0	0	1	1	no
13105.m00252	LOC_Os05g02780.4	=	glycine-rich protein A3, putative, expressed	chr05:915584-1002819	HIDATA	0	0	0	0	1	1	no	HIDATA	0	0	0	0	1	1	no	HIDATA	0	0	0	0	1	1	no	FAIL	10.7931	1.34489	0	0	1	1	no
13105.m00251	LOC_Os05g02780.1	=	glycine-rich protein A3, putative, expressed	chr05:915584-1002819	HIDATA	0	0	0	0	1	1	no	HIDATA	0	0	0	0	1	1	no	HIDATA	0	0	0	0	1	1	no	FAIL	11.7418	38.2578	0	0	1	1	no
13101.m00042	LOC_Os01g01302.1	=	shikimate kinase, putative, expressed	chr01:144576-169512	LOWDATA	20.2508	10.4101	-0.960001	0	1	1	no	OK	37.2666	14.8764	-1.32486	1.42231	0.154937	0.465345	no	OK	19.7432	12.6382	-0.643567	0.60213	0.547087	1	no	OK	35.2446	20.169	-0.805265	1.69298	0.0904598	0.590498	no
13101.m00057	LOC_Os01g01390.5	=	expressed protein	chr01:185151-208606	LOWDATA	1.45544	1.19457	-0.28497	0	1	1	no	NOTEST	1.11692	0.0780569	-3.83885	0.0450353	0.964079	1	no	LOWDATA	1.0019	0.239403	-2.06523	0	1	1	no	NOTEST	0.65288	0.70359	0.107917	-0.00911709	0.992726	1	no
13101.m00058	LOC_Os01g01400.1	=	expressed protein	chr01:185151-208606	LOWDATA	0.618345	0.502542	-0.299167	0	1	1	no	LOWDATA	0.36436	0.216158	-0.75328	0	1	1	no	LOWDATA	0.418134	0.512503	0.293593	0	1	1	no	LOWDATA	0.630849	1.0197	0.692775	0	1	1	no
13101.m00062	LOC_Os01g01420.2	=	expressed protein	chr01:208766-213229	LOWDATA	0.312558	0.501872	0.683196	0	1	1	no	LOWDATA	0.880996	0.179813	-2.29264	0	1	1	no	LOWDATA	0.156192	0.12484	-0.323241	0	1	1	no	NOTEST	0	0	0	0	1	1	no
13101.m00110	LOC_Os01g01800.1	=	expressed protein	chr01:421451-448728	LOWDATA	2.05282	5.47353	1.41487	0	1	1	no	NOTEST	2.5837	1.74	-0.570349	0.315704	0.752227	1	no	LOWDATA	4.01284	6.45358	0.685476	0	1	1	no	LOWDATA	3.69688	1.41901	-1.38142	0	1	1	no
13101.m00121	LOC_Os01g01920.2	=	HD domain containing protein 2, putative, expressed	chr01:497453-505264	LOWDATA	2.79098	4.07239	0.545104	0	1	1	no	NOTEST	1.57907	3.64194	1.20563	-0.689564	0.490469	1	no	OK	2.97161	5.54287	0.899386	-1.20334	0.228843	0.775151	no	OK	1.99938	7.10601	1.82948	-2.48943	0.0127949	0.17019	no
13101.m00143	LOC_Os01g02090.1	=	expressed protein	chr01:561055-592759	LOWDATA	12.8125	13.6702	0.0934831	0	1	1	no	OK	19.8541	12.6542	-0.649818	1.24764	0.212164	0.539208	no	LOWDATA	14.0073	15.1565	0.113761	0	1	1	no	OK	20.1101	23.0775	0.19857	-0.335177	0.737492	1	no
13101.m00182	LOC_Os01g02400.1	=	protein kinase domain containing protein, expressed	chr01:741271-919394	LOWDATA	2.57214	7.02658	1.44985	0	1	1	no	LOWDATA	1.22365	1.75958	0.524041	0	1	1	no	LOWDATA	1.09341	7.41608	2.76182	0	1	1	no	LOWDATA	0.170112	3.06665	4.17211	0	1	1	no
13101.m00180	LOC_Os01g02400.3	=	protein kinase domain containing protein, expressed	chr01:741271-919394	LOWDATA	0.535343	0.829995	0.632639	0	1	1	no	NOTEST	0.963891	0.227997	-2.07986	0.254693	0.79896	1	no	LOWDATA	0.175552	0.155297	-0.17687	0	1	1	no	LOWDATA	0.0724662	0.185285	1.35437	0	1	1	no
13101.m00189	LOC_Os01g02470.1	=	conserved hypothetical protein	chr01:741271-919394	LOWDATA	2.24617	1.20178	-0.902287	0	1	1	no	NOTEST	1.63262	1.7129	0.0692564	-0.058411	0.953421	1	no	LOWDATA	0.283322	0.33866	0.257394	0	1	1	no	LOWDATA	0.302667	0.291351	-0.0549748	0	1	1	no
13101.m00194	LOC_Os01g02520.1	=	retrotransposon protein, putative, unclassified	chr01:741271-919394	LOWDATA	0.000623568	0.0667192	6.74141	0	1	1	no	NOTEST	0.00131851	0.00051436	-1.35806	0.0207141	0.983474	1	no	NOTEST	0	0	0	0	1	1	no	NOTEST	0	0	0	0	1	1	no
13101.m00198	LOC_Os01g02560.1	=	Ser/Thr receptor-like kinase, putative, expressed	chr01:741271-919394	LOWDATA	4.44467	2.77305	-0.680604	0	1	1	no	OK	6.27472	4.186	-0.583979	0.719655	0.471737	0.760942	no	LOWDATA	2.81308	3.55747	0.338702	0	1	1	no	LOWDATA	3.57633	5.11226	0.515483	0	1	1	no
13101.m00202	LOC_Os01g02600.1	=	Ser/Thr receptor-like kinase, putative, expressed	chr01:741271-919394	LOWDATA	2.84775	3.49143	0.293999	0	1	1	no	OK	3.55824	2.30918	-0.623783	0.441781	0.658648	0.873627	no	LOWDATA	0.816959	2.81117	1.78284	0	1	1	no	LOWDATA	1.61717	2.70323	0.741215	0	1	1	no
13101.m00226	LOC_Os01g02870.1	=	auxin-induced protein 5NG4, putative, expressed	chr01:934573-1018545	LOWDATA	12.2702	8.75767	-0.486535	0	1	1	no	LOWDATA	24.6224	16.3055	-0.59462	0	1	1	no	OK	11.8889	8.53862	-0.477545	0.429026	0.667904	1	no	LOWDATA	20.6144	21.7562	0.0777722	0	1	1	no
13101.m00294	LOC_Os01g03429.1	=	conserved hypothetical protein	chr01:1337228-1499609	LOWDATA	0.065907	0.347338	2.39784	0	1	1	no	LOWDATA	0.143714	0.421381	1.55193	0	1	1	no	LOWDATA	0.0701964	0.180723	1.36431	0	1	1	no	NOTEST	0.0656156	0.368449	2.48935	-0.909037	0.363331	1	no
13101.m00299	LOC_Os01g03490.1	=	heavy-metal-associated domain-containing protein, putative, expressed	chr01:1337228-1499609	LOWDATA	10.1204	9.45796	-0.0976602	0	1	1	no	LOWDATA	14.0274	11.0975	-0.338007	0	1	1	no	LOWDATA	10.2268	11.4727	0.165844	0	1	1	no	OK	18.2978	13.5672	-0.431548	0.792602	0.42801	1	no
13101.m00301	LOC_Os01g03510.1	=	WD domain, G-beta repeat domain containing protein, expressed	chr01:1337228-1499609	LOWDATA	10.6392	12.7615	0.262401	0	1	1	no	LOWDATA	11.9561	8.5607	-0.481944	0	1	1	no	LOWDATA	10.1811	12.7396	0.32343	0	1	1	no	OK	11.9798	12.7141	0.0858263	-0.151588	0.879512	1	no
13101.m00304	LOC_Os01g03530.2	=	multicopper oxidase domain containing protein, expressed	chr01:1337228-1499609	LOWDATA	2.98221	8.55286	1.52003	0	1	1	no	LOWDATA	0.418972	2.85605	2.7691	0	1	1	no	LOWDATA	1.48745	6.92593	2.21917	0	1	1	no	LOWDATA	0.782548	9.44337	3.59305	0	1	1	no
13101.m00305	LOC_Os01g03549.1	=	multi-copper oxidase type I family protein, putative, expressed	chr01:1337228-1499609	LOWDATA	6.89095	3.70138	-0.896639	0	1	1	no	LOWDATA	13.5039	8.53211	-0.662396	0	1	1	no	LOWDATA	6.05109	4.49857	-0.42773	0	1	1	no	OK	8.38149	7.51979	-0.156515	0.211363	0.832604	1	no
13101.m00306	LOC_Os01g03570.1	=	transcription factor X1, putative, expressed	chr01:1337228-1499609	LOWDATA	2.54574	2.98651	0.230375	0	1	1	no	LOWDATA	2.10375	0.928511	-1.17997	0	1	1	no	LOWDATA	2.36234	2.32658	-0.0220045	0	1	1	no	LOWDATA	1.75253	1.07969	-0.698824	0	1	1	no
13101.m00308	LOC_Os01g03590.1	=	transposon protein, putative, CACTA, En/Spm sub-class	chr01:1337228-1499609	LOWDATA	0.00574096	0.0140338	1.28954	0	1	1	no	LOWDATA	0.0156429	0.00596477	-1.39097	0	1	1	no	NOTEST	0.0024672	0	0	0	1	1	no	NOTEST	0	0	0	0	1	1	no
13101.m00411	LOC_Os01g04540.1	=	serine/threonine-protein kinase At1g18390 precursor, putative, expressed	chr01:2020377-2037567	LOWDATA	0.315129	0.227501	-0.470065	0	1	1	no	NOTEST	0	0	0	0	1	1	no	LOWDATA	0.0587031	0.139709	1.25092	0	1	1	no	NOTEST	0.0218719	0.0060997	-1.84227	0.394272	0.69338	1	no
13101.m00412	LOC_Os01g04550.1	=	expressed protein	chr01:2020377-2037567	LOWDATA	0.193008	0.0598138	-1.69011	0	1	1	no	LOWDATA	0.190155	0.0520618	-1.86888	0	1	1	no	NOTEST	0.0169818	0.739044	5.4436	-1.28488	0.198834	1	no	NOTEST	0.182858	0.2981	0.705072	-0.397786	0.690788	1	no
13101.m00416	LOC_Os01g04580.1	=	Ser/Thr protein kinase, putative, expressed	chr01:2042319-2065150	LOWDATA	2.12096	13.0523	2.62152	0	1	1	no	NOTEST	0	0	0	0	1	1	no	NOTEST	1.56188	0	-1e+300	-1e+300	0.00254343	1	no	NOTEST	1.25781	0	0	0	1	1	no
13101.m00417	LOC_Os01g04590.1	=	expressed protein	chr01:2042319-2065150	LOWDATA	0.248766	3.07084	3.62577	0	1	1	no	NOTEST	0	0	0	0	1	1	no	NOTEST	0.944282	0	-1e+300	-1e+300	0.0895463	1	no	NOTEST	1.48179	0	0	0	1	1	no
13101.m00435	LOC_Os01g04720.2	=	leucine-rich repeat protein-related, putative, expressed	chr01:2117608-2136331	LOWDATA	0.217519	0.134685	-0.691548	0	1	1	no	NOTEST	0	0	0	0	1	1	no	LOWDATA	0.143796	0.112324	-0.356362	0	1	1	no	NOTEST	0.123907	0	0	0	1	1	no
13101.m14897	LOC_Os01g05105.1	=	expressed protein	chr01:2390144-2397292	LOWDATA	0.0562969	0.106276	0.916693	0	1	1	no	NOTEST	0.0365935	0	-1e+300	-1e+300	0.0138041	1	no	NOTEST	0.0229917	0.0216487	-0.086834	0.00909244	0.992745	1	no	NOTEST	0.0395473	0.0413065	0.0627916	-0.00880311	0.992976	1	no
13101.m00512	LOC_Os01g05400.1	=	conserved hypothetical protein	chr01:2545792-2582575	LOWDATA	2.75325	1.70705	-0.689626	0	1	1	no	NOTEST	1.46428	1.55668	0.0882809	-0.0694765	0.94461	1	no	LOWDATA	0.977674	0.890177	-0.135261	0	1	1	no	NOTEST	1.78317	1.60922	-0.148084	0.177785	0.858892	1	no
13101.m00513	LOC_Os01g05410.1	=	hypothetical protein	chr01:2545792-2582575	LOWDATA	0.535818	2.06711	1.9478	0	1	1	no	NOTEST	0.346184	0	-1e+300	-1e+300	0.124107	1	no	LOWDATA	0.338357	0.217778	-0.63569	0	1	1	no	NOTEST	0.158139	0.570848	1.85192	-1.06806	0.285493	1	no
13101.m00514	LOC_Os01g05420.1	=	IWS1 C-terminus family protein, putative, expressed	chr01:2545792-2582575	LOWDATA	19.6505	23.7583	0.273866	0	1	1	no	OK	18.591	12.8564	-0.532124	0.857065	0.391409	0.704498	no	LOWDATA	17.1075	31.2467	0.869077	0	1	1	no	LOWDATA	21.9456	27.6539	0.33355	0	1	1	no
13101.m42763	LOC_Os01g05694.1	=	hypothetical protein	chr01:2706497-2724199	LOWDATA	4.05944	5.61692	0.468498	0	1	1	no	OK	8.33945	1.53956	-2.43744	0.245155	0.806337	0.94593	no	LOWDATA	4.80171	10.1322	1.07733	0	1	1	no	LOWDATA	11.5778	9.99996	-0.211368	0	1	1	no
13101.m00562	LOC_Os01g05790.1	=	SLT1 protein, putative, expressed	chr01:2764772-2789773	LOWDATA	9.47622	9.75	0.0410905	0	1	1	no	OK	11.7935	8.10168	-0.541702	0.74424	0.456731	0.751023	no	OK	5.92749	12.8793	1.11957	-1.21411	0.224704	0.771906	no	OK	5.34001	7.63409	0.515614	-0.492041	0.62269	1	no
13101.m00563	LOC_Os01g05800.2	=	inner membrane protein, putative, expressed	chr01:2764772-2789773	LOWDATA	17.7897	18.8511	0.0836084	0	1	1	no	LOWDATA	29.6024	13.4181	-1.14154	0	1	1	no	OK	16.9467	16.5231	-0.0365148	0.0569596	0.954577	1	no	OK	22.7486	17.7002	-0.362012	0.603218	0.546364	1	no
13101.m00564	LOC_Os01g05800.1	=	inner membrane protein, putative, expressed	chr01:2764772-2789773	LOWDATA	12.0468	5.31845	-1.17957	0	1	1	no	OK	16.6113	8.53266	-0.9611	0.973181	0.330463	0.65611	no	OK	9.59797	4.79746	-1.00046	1.0517	0.292939	0.850324	no	OK	13.3077	11.4503	-0.216873	0.275119	0.783225	1	no
13101.m00565	LOC_Os01g05810.1	=	gamma-glutamyltranspeptidase 1 precursor, putative, expressed	chr01:2764772-2789773	LOWDATA	0.969541	4.58158	2.24047	0	1	1	no	OK	4.88799	7.95604	0.702808	-0.757642	0.448665	0.745811	no	LOWDATA	0.580773	1.86597	1.68388	0	1	1	no	LOWDATA	3.97803	8.66371	1.12293	0	1	1	no
13101.m00569	LOC_Os01g05840.2	=	oxidoreductase, short chain dehydrogenase/reductase family domain containing family, expressed	chr01:2790215-2814017	LOWDATA	5.89101	1.85539	-1.6668	0	1	1	no	OK	10.209	8.27949	-0.302227	0.427285	0.669172	0.878775	no	OK	3.21271	3.73462	0.217172	-0.077636	0.938118	1	no	LOWDATA	14.2235	10.5243	-0.434554	0	1	1	no
13101.m00572	LOC_Os01g05860.1	=	PPR repeat domain containing protein, putative, expressed	chr01:2790215-2814017	LOWDATA	1.24439	1.27237	0.0320727	0	1	1	no	NOTEST	1.25358	0.575697	-1.12267	1.71466	0.0864072	1	no	NOTEST	1.56545	1.35674	-0.206439	0.162515	0.8709	1	no	LOWDATA	0.869285	0.87165	0.00391892	0	1	1	no
13101.m00615	LOC_Os01g06280.1	=	TKL_IRAK_CrRLK1L-1.4 - The CrRLK1L-1 subfamily has homology to the CrRLK1L homolog, expressed	chr01:2961236-2988308	LOWDATA	3.48746	4.38836	0.331506	0	1	1	no	OK	5.32384	2.99498	-0.829922	0.854717	0.392708	0.70558	no	OK	1.06302	2.23639	1.07301	-0.350107	0.726258	1	no	NOTEST	0.925373	2.34163	1.33941	-0.726543	0.467506	1	no
13101.m00839	LOC_Os01g08110.1	=	flavonol-3-O-glycoside-7-O-glucosyltransferase 1, putative, expressed	chr01:3916917-3943545	LOWDATA	1.29023	5.16083	1.99997	0	1	1	no	LOWDATA	0.899706	1.63235	0.859422	0	1	1	no	OK	1.5365	6.47238	2.07465	-0.792412	0.42812	0.946565	no	OK	0.903409	5.04797	2.48225	-1.50034	0.133526	0.71358	no
13101.m00842	LOC_Os01g08140.1	=	phototropic-responsive NPH3 family protein, putative	chr01:3916917-3943545	LOWDATA	0.420224	0.184144	-1.19032	0	1	1	no	NOTEST	0.289892	0	0	0	1	1	no	LOWDATA	0.190341	0.287426	0.594602	0	1	1	no	LOWDATA	0.638542	0.506406	-0.334487	0	1	1	no
13101.m00977	LOC_Os01g09220.1	=	transposon protein, putative, CACTA, En/Spm sub-class, expressed	chr01:4630542-4647260	LOWDATA	24.4828	36.4199	0.57296	0	1	1	no	LOWDATA	27.0834	26.1121	-0.0526916	0	1	1	no	LOWDATA	11.3412	17.5374	0.628859	0	1	1	no	LOWDATA	32.3618	19.7288	-0.713989	0	1	1	no
13101.m01021	LOC_Os01g09560.1	=	mitochondrial-processing peptidase subunit alpha, mitochondrial precursor, putative, expressed	chr01:4890445-4921315	LOWDATA	5.10842	3.75277	-0.444921	0	1	1	no	OK	3.86134	8.51134	1.14029	-0.737943	0.460549	0.753794	no	OK	9.74989	1.80436	-2.4339	0.727267	0.467062	0.967164	no	NOTEST	0	0	0	0	1	1	no
13101.m01039	LOC_Os01g09730.1	=	expressed protein	chr01:5015278-5019150	LOWDATA	0.0722445	0.047962	-0.590996	0	1	1	no	NOTEST	0	0	0	0	1	1	no	NOTEST	0	0.0262025	1e+300	1e+300	0.123576	1	no	LOWDATA	0.0527915	0.0501124	-0.0751374	0	1	1	no
13101.m01097	LOC_Os01g10210.1	=	lachrymatory factor synthase, putative, expressed	chr01:5327817-5490095	LOWDATA	18.4225	14.0715	-0.388695	0	1	1	no	LOWDATA	33.9594	27.3549	-0.312016	0	1	1	no	LOWDATA	19.0153	11.8974	-0.67651	0	1	1	no	FAIL	24.2364	17.0986	0	0	1	1	no
13101.m01099	LOC_Os01g10230.1	=	lachrymatory factor synthase, putative, expressed	chr01:5327817-5490095	LOWDATA	0.170987	1.69624	3.31037	0	1	1	no	NOTEST	0	0	0	0	1	1	no	LOWDATA	0.145694	0.750187	2.36431	0	1	1	no	FAIL	0.136186	0.436981	0	0	1	1	no
13101.m01116	LOC_Os01g10350.1	=	MPPN domain containing protein, expressed	chr01:5327817-5490095	LOWDATA	5.23739	4.21619	-0.312907	0	1	1	no	LOWDATA	5.659	4.13818	-0.451551	0	1	1	no	LOWDATA	5.97267	6.56992	0.137501	0	1	1	no	FAIL	9.15042	8.53711	0	0	1	1	no
13101.m01120	LOC_Os01g10400.2	=	expressed protein	chr01:5327817-5490095	LOWDATA	428.244	173.152	-1.30639	0	1	1	no	LOWDATA	486.246	180.349	-1.43089	0	1	1	no	LOWDATA	508.634	548.558	0.109016	0	1	1	no	FAIL	387.939	68.3845	0	0	1	1	no
13101.m01122	LOC_Os01g10400.1	=	expressed protein	chr01:5327817-5490095	LOWDATA	20.7218	47.946	1.21026	0	1	1	no	LOWDATA	49.8928	16.5969	-1.58791	0	1	1	no	LOWDATA	8.22184	11.4045	0.472071	0	1	1	no	FAIL	11.3058	9.02261	0	0	1	1	no
13101.m01167	LOC_Os01g10810.1	=	rho termination factor, N-terminal domain containing protein, expressed	chr01:5767198-5789883	LOWDATA	4.42458	3.47706	-0.347671	0	1	1	no	OK	9.8088	4.18044	-1.23042	1.40679	0.15949	0.4684	no	LOWDATA	5.18579	3.43799	-0.593001	0	1	1	no	LOWDATA	4.34211	2.68371	-0.694168	0	1	1	no
13101.m01184	LOC_Os01g10970.1	=	auxin-induced protein 5NG4, putative	chr01:5822868-5876837	LOWDATA	0.0514971	0.0319289	-0.689626	0	1	1	no	NOTEST	0.0748609	0	-1e+300	-1e+300	0.124107	1	no	NOTEST	0	0.0823687	1e+300	1e+300	0.0400592	1	no	NOTEST	0	0.0411254	1e+300	1e+300	0.158655	1	no
13101.m01185	LOC_Os01g10980.1	=	auxin-induced protein 5NG4, putative	chr01:5822868-5876837	LOWDATA	1.44377	1.43551	-0.00827588	0	1	1	no	NOTEST	1.93558	0.422041	-2.19731	0.535852	0.592061	1	no	OK	2.28681	1.08523	-1.07534	0.451254	0.651806	1	no	NOTEST	1.30562	0	-1e+300	-1e+300	0.419109	1	no
13101.m01186	LOC_Os01g10990.1	=	integral membrane protein DUF6 containing protein, expressed	chr01:5822868-5876837	LOWDATA	2.43079	4.18243	0.782916	0	1	1	no	NOTEST	1.66806	2.62201	0.652504	-0.653368	0.513519	1	no	OK	2.61526	3.4024	0.379599	-0.253981	0.79951	1	no	NOTEST	2.10731	1.9027	-0.147354	0.0572451	0.95435	1	no
13101.m01195	LOC_Os01g11054.3	=	phosphoenolpyruvate carboxylase, putative, expressed	chr01:5889484-5908595	LOWDATA	0.743924	0.262052	-1.5053	0	1	1	no	LOWDATA	1.54251	0.202443	-2.92969	0	1	1	no	LOWDATA	0.27289	0.237635	-0.199573	0	1	1	no	LOWDATA	0.663316	0.465593	-0.510626	0	1	1	no
13101.m01194	LOC_Os01g11054.2	=	phosphoenolpyruvate carboxylase, putative, expressed	chr01:5889484-5908595	LOWDATA	0.606708	0.317311	-0.935106	0	1	1	no	LOWDATA	0.77225	0.0959373	-3.0089	0	1	1	no	LOWDATA	0.235794	0.242077	0.03794	0	1	1	no	LOWDATA	0.213681	0.19451	-0.135612	0	1	1	no
13101.m01346	LOC_Os01g12470.1	=	mitochondrial carrier protein, putative, expressed	chr01:6835904-6957758	LOWDATA	2.80567	6.57046	1.22765	0	1	1	no	LOWDATA	0.652285	4.05971	2.6378	0	1	1	no	LOWDATA	2.57308	7.71816	1.58476	0	1	1	no	LOWDATA	2.60493	6.16613	1.24312	0	1	1	no
13101.m01357	LOC_Os01g12530.4	=	smr domain containing protein, expressed	chr01:6835904-6957758	LOWDATA	1.73143	0.597966	-1.53383	0	1	1	no	LOWDATA	2.18852	0.552874	-1.98494	0	1	1	no	LOWDATA	0.366112	1.56648	2.09717	0	1	1	no	NOTEST	0	0	0	0	1	1	no
13101.m01356	LOC_Os01g12530.5	=	smr domain containing protein, expressed	chr01:6835904-6957758	LOWDATA	0.971831	0.925702	-0.0701583	0	1	1	no	LOWDATA	1.47131	0.834114	-0.818788	0	1	1	no	LOWDATA	0.676514	0.242326	-1.48117	0	1	1	no	NOTEST	0.18187	0.732139	2.00921	-0.109673	0.912668	1	no
13101.m01359	LOC_Os01g12540.1	=	GTPase of unknown function domain containing protein, putative, expressed	chr01:6835904-6957758	LOWDATA	0.358614	1.14643	1.67664	0	1	1	no	LOWDATA	1.00139	0.901581	-0.151478	0	1	1	no	LOWDATA	2.31274	1.84307	-0.327489	0	1	1	no	LOWDATA	0.5588	0.318101	-0.812849	0	1	1	no
13101.m01378	LOC_Os01g12680.4	=	C4-dicarboxylate transporter/malic acid transport protein, expressed	chr01:6986900-6993006	LOWDATA	0.237339	0.146626	-0.69481	0	1	1	no	NOTEST	0	0	0	0	1	1	no	NOTEST	0.368284	0	-1e+300	-1e+300	0.383815	1	no	NOTEST	0	0	0	0	1	1	no
13101.m01639	LOC_Os01g14860.2	=	CGMC_GSK.1 - CGMC includes CDA, MAPK, GSK3, and CLKC kinases, expressed	chr01:8328703-8346130	LOWDATA	4.09777	4.98775	0.283548	0	1	1	no	OK	4.73872	1.97822	-1.26029	1.97941	0.0477695	0.251952	no	OK	2.49603	5.72308	1.19716	-0.564712	0.572269	1	no	NOTEST	2.98644	3.23577	0.115682	-0.023809	0.981005	1	no
13101.m01638	LOC_Os01g14860.1	=	CGMC_GSK.1 - CGMC includes CDA, MAPK, GSK3, and CLKC kinases, expressed	chr01:8328703-8346130	LOWDATA	23.7229	28.4021	0.259715	0	1	1	no	OK	25.801	20.5397	-0.329011	0.590352	0.554955	0.815616	no	OK	32.2828	43.3354	0.424781	-0.82483	0.409468	0.939682	no	LOWDATA	39.1671	38.3025	-0.0322026	0	1	1	no
13101.m01642	LOC_Os01g14870.1	=	zinc finger matrin-type protein 5, putative, expressed	chr01:8328703-8346130	LOWDATA	3.83704	5.91671	0.624799	0	1	1	no	OK	2.91012	4.07317	0.485076	-0.807798	0.419207	0.725648	no	OK	3.15494	4.35133	0.463845	-0.661801	0.508099	0.987868	no	LOWDATA	3.74636	3.88658	0.0530135	0	1	1	no
13101.m01896	LOC_Os01g16920.1	=	embryonic protein DC-8, putative, expressed	chr01:9664384-9688558	LOWDATA	0.154601	8.89535	5.84643	0	1	1	no	OK	0.089897	4.84337	5.75159	-4.74316	2.10413e-06	0.000172912	yes	LOWDATA	0.0219548	5.82191	8.05081	0	1	1	no	OK	0.205221	15.1618	6.20712	-7.4804	7.41629e-14	6.71658e-11	yes
13101.m01928	LOC_Os01g17180.2	=	proteasome subunit, putative, expressed	chr01:9873301-9901790	LOWDATA	0.631911	0.526701	-0.262736	0	1	1	no	NOTEST	0.494579	0	-1e+300	-1e+300	0.442622	1	no	NOTEST	0	0	0	0	1	1	no	NOTEST	1.48657	3.06042	1.04175	-0.112485	0.910439	1	no
13101.m01964	LOC_Os01g18070.1	=	bacterial transferase hexapeptide domain containing protein, expressed	chr01:10118186-10122869	LOWDATA	31.2654	31.6479	0.0175439	0	1	1	no	OK	41.2908	28.6161	-0.528994	1.16973	0.24211	0.572987	no	LOWDATA	35.3664	33.4812	-0.0790308	0	1	1	no	LOWDATA	43.5791	38.4606	-0.180255	0	1	1	no
13101.m02101	LOC_Os01g19320.1	=	hypothetical protein	chr01:10930599-10932100	LOWDATA	0.306129	0.328106	0.100022	0	1	1	no	NOTEST	0	0	0	0	1	1	no	NOTEST	0	0	0	0	1	1	no	NOTEST	0.238481	0	0	0	1	1	no
13101.m02207	LOC_Os01g20830.1	=	heavy metal-associated domain containing protein, expressed	chr01:11608437-11636334	LOWDATA	8.73413	0.64668	-3.75554	0	1	1	no	LOWDATA	15.9115	2.11593	-2.91071	0	1	1	no	OK	13.3118	1.27315	-3.38623	2.29975	0.0214626	0.217476	no	OK	10.2637	1.21225	-3.08178	1.70902	0.0874471	0.579002	no
13101.m02360	LOC_Os01g22230.1	=	peroxidase precursor, putative, expressed	chr01:12498868-12639649	LOWDATA	9.37767	9.13655	-0.0375796	0	1	1	no	LOWDATA	16.0854	13.1289	-0.293004	0	1	1	no	OK	12.2757	10.0754	-0.28497	0.303248	0.761701	1	no	LOWDATA	21.5146	15.8061	-0.444833	0	1	1	no
13101.m02362	LOC_Os01g22249.1	=	peroxidase precursor, putative, expressed	chr01:12498868-12639649	LOWDATA	6.0687	6.05174	-0.00403652	0	1	1	no	LOWDATA	11.7046	1.83887	-2.67019	0	1	1	no	OK	6.61668	4.6525	-0.508101	0.547612	0.583958	1	no	LOWDATA	4.9024	6.21936	0.343278	0	1	1	no
13101.m02369	LOC_Os01g22336.1	=	peroxidase precursor, putative, expressed	chr01:12498868-12639649	LOWDATA	4.41747	9.8213	1.15269	0	1	1	no	LOWDATA	2.811	2.54228	-0.144964	0	1	1	no	OK	4.82193	8.45032	0.809397	-1.1487	0.250678	0.803468	no	LOWDATA	5.00994	19.4855	1.95953	0	1	1	no
13101.m02371	LOC_Os01g22370.1	=	peroxidase precursor, putative, expressed	chr01:12498868-12639649	LOWDATA	10.9945	14.6795	0.417017	0	1	1	no	LOWDATA	9.26195	17.4794	0.916264	0	1	1	no	OK	12.269	18.5326	0.595055	-0.715934	0.474032	0.970627	no	LOWDATA	15.6652	26.29	0.746952	0	1	1	no
13101.m02386	LOC_Os01g22500.1	=	craniofacial development protein 1, putative, expressed	chr01:12644469-12657449	LOWDATA	11.575	13.341	0.204851	0	1	1	no	LOWDATA	11.1849	8.05593	-0.473427	0	1	1	no	LOWDATA	10.5658	14.3253	0.439153	0	1	1	no	LOWDATA	17.128	15.2223	-0.170177	0	1	1	no
13101.m02387	LOC_Os01g22510.1	=	cyclase/dehydrase family protein, expressed	chr01:12644469-12657449	LOWDATA	14.1324	17.9588	0.345677	0	1	1	no	LOWDATA	18.3117	7.43812	-1.29976	0	1	1	no	LOWDATA	10.3813	17.367	0.742361	0	1	1	no	LOWDATA	9.63302	12.111	0.330261	0	1	1	no
13101.m02399	LOC_Os01g22630.1	=	ECT protein, putative, expressed	chr01:12688159-12730500	LOWDATA	3.51968	6.06789	0.785749	0	1	1	no	NOTEST	2.001	1.51405	-0.402306	0.642137	0.520784	1	no	OK	3.69458	10.4617	1.50164	-2.34995	0.0187757	0.20092	no	OK	3.68644	0	-1e+300	-1e+300	0.000348082	0.0119338	yes
13101.m02417	LOC_Os01g22780.2	=	GDSL-like lipase/acylhydrolase, putative, expressed	chr01:12803552-12809198	LOWDATA	1.73168	0	-1e+300	0	1	1	no	NOTEST	2.5921	1.26051	-1.04011	1.02969	0.303157	1	no	OK	2.33722	0.200855	-3.54056	2.83295	0.00461202	0.082092	no	NOTEST	1.00156	0.405601	-1.30411	0.695556	0.486707	1	no
13101.m02428	LOC_Os01g22900.1	=	neutral/alkaline invertase, putative, expressed	chr01:12869201-12873238	LOWDATA	39.5489	39.1509	-0.0145922	0	1	1	no	LOWDATA	24.1871	22.2398	-0.12109	0	1	1	no	LOWDATA	14.4257	29.0203	1.00842	0	1	1	no	LOWDATA	17.3322	27.5063	0.666309	0	1	1	no
13101.m02497	LOC_Os01g23610.1	=	dihydrolipoyl dehydrogenase, putative, expressed	chr01:13271587-13281175	LOWDATA	11.4349	12.8893	0.172731	0	1	1	no	LOWDATA	18.9884	8.93413	-1.08772	0	1	1	no	OK	12.9334	14.6024	0.175103	-0.272698	0.785085	1	no	OK	20.2888	16.4752	-0.300384	0.539122	0.589803	1	no
13101.m15021	LOC_Os01g27020.5	=	transposon protein, putative, unclassified, expressed	chr01:15058395-15066528	LOWDATA	0.19515	0.242451	0.313112	0	1	1	no	NOTEST	0.337198	0	0	0	1	1	no	LOWDATA	0.0804998	0.184789	1.19882	0	1	1	no	LOWDATA	0.220938	0.315578	0.514358	0	1	1	no
13101.m02906	LOC_Os01g27990.2	=	NPL4, putative, expressed	chr01:15643785-15648494	LOWDATA	0.330749	0.650002	0.974707	0	1	1	no	LOWDATA	0.713744	0.0987173	-2.85403	0	1	1	no	LOWDATA	0.135817	0.182505	0.426271	0	1	1	no	LOWDATA	0.128996	0.0744107	-0.793746	0	1	1	no
13101.m03177	LOC_Os01g31610.1	=	tyrosyl-tRNA synthetase, putative, expressed	chr01:17259319-17349770	LOWDATA	12.8825	6.80604	-0.920521	0	1	1	no	LOWDATA	30.0687	11.0919	-1.43875	0	1	1	no	OK	10.5956	7.68326	-0.463667	0.672595	0.501205	0.985048	no	LOWDATA	22.8989	14.8029	-0.629395	0	1	1	no
13101.m03187	LOC_Os01g31690.2	=	oxygen-evolving enhancer protein 1, chloroplast precursor, putative, expressed	chr01:17259319-17349770	LOWDATA	290.024	180.123	-0.687185	0	1	1	no	LOWDATA	665.704	502.385	-0.406088	0	1	1	no	LOWDATA	428.079	154.47	-1.47055	0	1	1	no	OK	448.766	362.869	-0.306516	0.883758	0.376827	1	no
13101.m03261	LOC_Os01g32350.3	=	OsClp2 - Putative Clp protease homologue, expressed	chr01:17745316-17751044	LOWDATA	0.194783	0.199855	0.0370874	0	1	1	no	NOTEST	0	0	0	0	1	1	no	NOTEST	0	0	0	0	1	1	no	NOTEST	0.169829	0	0	0	1	1	no
13101.m03707	LOC_Os01g36610.1	=	conserved hypothetical protein	chr01:20311899-20315558	LOWDATA	0.142128	0.19252	0.437813	0	1	1	no	NOTEST	0	0	0	0	1	1	no	NOTEST	0	0	0	0	1	1	no	NOTEST	0	0	0	0	1	1	no
13101.m03813	LOC_Os01g37500.1	=	hypothetical protein	chr01:20930723-20956239	LOWDATA	0.710452	0.770888	0.117784	0	1	1	no	NOTEST	0	0	0	0	1	1	no	NOTEST	0	0	0	0	1	1	no	NOTEST	0	0	0	0	1	1	no
13101.m15039	LOC_Os01g37825.2	=	M16 domain containing zinc peptidase, putative, expressed	chr01:21142347-21178921	LOWDATA	0.979466	2.18119	1.15505	0	1	1	no	LOWDATA	0.636315	0.0695487	-3.19364	0	1	1	no	NOTEST	0.680164	0	0	0	1	1	no	LOWDATA	7.35331	5.13684	-0.517514	0	1	1	no
13101.m03847	LOC_Os01g37825.1	=	M16 domain containing zinc peptidase, putative, expressed	chr01:21142347-21178921	LOWDATA	8.26401	7.75164	-0.0923416	0	1	1	no	LOWDATA	10.0135	4.77834	-1.06736	0	1	1	no	LOWDATA	5.78434	8.02069	0.471573	0	1	1	no	LOWDATA	3.31748	3.40616	0.0380568	0	1	1	no
13101.m03851	LOC_Os01g37832.2	=	thioredoxin, putative, expressed	chr01:21142347-21178921	LOWDATA	0.286173	1.34137	2.22875	0	1	1	no	NOTEST	0.89644	0.137074	-2.70925	0.0778813	0.937923	1	no	LOWDATA	0.691461	0.386038	-0.840905	0	1	1	no	NOTEST	2.27488	2.45218	0.108275	-0.0340072	0.972871	1	no
13101.m03848	LOC_Os01g37832.1	=	thioredoxin, putative, expressed	chr01:21142347-21178921	LOWDATA	11.5314	15.611	0.437002	0	1	1	no	LOWDATA	11.9287	12.92	0.115176	0	1	1	no	LOWDATA	10.3287	22.8117	1.14311	0	1	1	no	LOWDATA	10.679	16.8757	0.660176	0	1	1	no
13101.m03850	LOC_Os01g37832.3	=	thioredoxin, putative, expressed	chr01:21142347-21178921	LOWDATA	0.965199	2.72803	1.49896	0	1	1	no	LOWDATA	1.26003	1.77958	0.498074	0	1	1	no	LOWDATA	0.743361	0.531873	-0.482981	0	1	1	no	LOWDATA	2.02934	1.90432	-0.0917342	0	1	1	no
13101.m03853	LOC_Os01g37837.1	=	seryl-tRNA synthetase, putative, expressed	chr01:21142347-21178921	LOWDATA	4.94823	2.93922	-0.75148	0	1	1	no	LOWDATA	7.92406	8.15585	0.0415948	0	1	1	no	LOWDATA	5.14729	9.41996	0.871909	0	1	1	no	LOWDATA	16.848	14.0187	-0.265221	0	1	1	no
13101.m03866	LOC_Os01g37910.2	=	vacuolar-processing enzyme precursor, putative, expressed	chr01:21229347-21233884	LOWDATA	1.04166	0.58119	-0.841805	0	1	1	no	LOWDATA	2.05453	0.497309	-2.0466	0	1	1	no	LOWDATA	0.497355	0.974678	0.97065	0	1	1	no	LOWDATA	1.21338	0.505503	-1.26324	0	1	1	no
13101.m03870	LOC_Os01g37950.1	=	expressed protein	chr01:21260749-21261444	LOWDATA	23.4819	19.4972	-0.268282	0	1	1	no	LOWDATA	57.2647	52.6536	-0.121112	0	1	1	no	OK	131.634	17.4544	-2.91487	2.00427	0.0450406	0.342878	no	LOWDATA	14.6714	8.10961	-0.855298	0	1	1	no
13101.m03896	LOC_Os01g38229.3	=	peptidyl-prolyl isomerase, putative, expressed	chr01:21413949-21440402	LOWDATA	0	0	0	0	1	1	no	NOTEST	0	0	0	0	1	1	no	LOWDATA	0	0	0	0	1	1	no	NOTEST	0	0	0	0	1	1	no
13101.m03898	LOC_Os01g38229.2	=	peptidyl-prolyl isomerase, putative, expressed	chr01:21413949-21440402	LOWDATA	0	0	0	0	1	1	no	NOTEST	0.639269	0.612959	-0.0606312	0.0801726	0.9361	1	no	LOWDATA	0	0	0	0	1	1	no	NOTEST	0.99196	0	-1e+300	-1e+300	0.00413327	1	no
13101.m03899	LOC_Os01g38229.1	=	peptidyl-prolyl isomerase, putative, expressed	chr01:21413949-21440402	LOWDATA	0	0	0	0	1	1	no	NOTEST	1.27525	0.476841	-1.4192	1.93031	0.053568	1	no	LOWDATA	0	0	0	0	1	1	no	NOTEST	0.929535	0	-1e+300	-1e+300	0.00481706	1	no
13101.m15047	LOC_Os01g41190.2	=	glycine-rich protein, putative, expressed	chr01:23315097-23607468	LOWDATA	0.647275	0.915643	0.500406	0	1	1	no	NOTEST	0.35015	0	0	0	1	1	no	LOWDATA	0.612253	1.16028	0.922269	0	1	1	no	LOWDATA	1.39963	0.22931	-2.60968	0	1	1	no
13101.m04222	LOC_Os01g41190.1	=	glycine-rich protein, putative, expressed	chr01:23315097-23607468	LOWDATA	1.57946	6.1196	1.954	0	1	1	no	LOWDATA	8.7376	1.59982	-2.44933	0	1	1	no	LOWDATA	7.32298	1.70025	-2.10668	0	1	1	no	LOWDATA	2.90526	3.06582	0.0776035	0	1	1	no
13101.m04223	LOC_Os01g41200.1	=	heavy metal-associated domain containing protein, expressed	chr01:23315097-23607468	LOWDATA	4.02572	3.62323	-0.151969	0	1	1	no	LOWDATA	2.92607	0.934241	-1.6471	0	1	1	no	LOWDATA	4.05799	6.05473	0.577298	0	1	1	no	LOWDATA	6.46564	5.7052	-0.180516	0	1	1	no
13101.m04224	LOC_Os01g41210.1	=	transposon protein, putative, unclassified, expressed	chr01:23315097-23607468	LOWDATA	3.0959	2.90671	-0.0909713	0	1	1	no	LOWDATA	3.65258	2.52032	-0.535308	0	1	1	no	LOWDATA	2.33758	3.17523	0.441846	0	1	1	no	LOWDATA	3.10562	2.6164	-0.2473	0	1	1	no
13101.m04225	LOC_Os01g41220.1	=	DUF538 domain containing protein, putative, expressed	chr01:23315097-23607468	LOWDATA	7.73732	14.7133	0.927218	0	1	1	no	LOWDATA	2.17599	1.94464	-0.162172	0	1	1	no	LOWDATA	13.0395	11.9137	-0.130274	0	1	1	no	LOWDATA	4.20552	25.6336	2.60768	0	1	1	no
13101.m04229	LOC_Os01g41250.1	=	OsFBX17 - F-box domain containing protein, expressed	chr01:23315097-23607468	LOWDATA	2.48894	3.06395	0.299857	0	1	1	no	LOWDATA	1.48744	0.698809	-1.08986	0	1	1	no	LOWDATA	2.87702	3.97581	0.466673	0	1	1	no	LOWDATA	2.41924	2.48155	0.0366859	0	1	1	no
13101.m04255	LOC_Os01g41510.1	=	calcineurin B, putative, expressed	chr01:23315097-23607468	LOWDATA	0.647369	0.706677	0.126463	0	1	1	no	LOWDATA	0.0739714	0.118254	0.676847	0	1	1	no	LOWDATA	0.398294	0.816111	1.03493	0	1	1	no	LOWDATA	0.164459	0.987636	2.58626	0	1	1	no
13101.m04269	LOC_Os01g41630.1	=	serine/threonine protein phosphatase 2A 55 kDa regulatory subunit B, putative, expressed	chr01:23315097-23607468	LOWDATA	7.47554	9.22566	0.303473	0	1	1	no	LOWDATA	8.92156	7.49642	-0.251094	0	1	1	no	LOWDATA	1.79174	4.24882	1.2457	0	1	1	no	LOWDATA	5.4408	9.04581	0.73343	0	1	1	no
13101.m04271	LOC_Os01g41640.1	=	expressed protein	chr01:23315097-23607468	LOWDATA	4.17861	4.45235	0.0915432	0	1	1	no	LOWDATA	5.19514	2.60511	-0.99582	0	1	1	no	LOWDATA	6.8408	8.71177	0.348801	0	1	1	no	LOWDATA	2.51312	7.67002	1.60975	0	1	1	no
13101.m04272	LOC_Os01g41650.1	=	pentatricopeptide, putative, expressed	chr01:23315097-23607468	LOWDATA	0.809458	0.811051	0.00283576	0	1	1	no	LOWDATA	1.31677	0.99536	-0.403714	0	1	1	no	LOWDATA	0.331872	0.0799451	-2.05354	0	1	1	no	LOWDATA	1.5262	0.394476	-1.95194	0	1	1	no
13101.m04302	LOC_Os01g41910.1	=	receptor-like protein kinase 5 precursor, putative	chr01:23759302-23785494	LOWDATA	0.524451	0.208939	-1.32773	0	1	1	no	LOWDATA	1.86035	0.427709	-2.12087	0	1	1	no	NOTEST	0.116035	0	0	0	1	1	no	LOWDATA	0.495269	1.5116	1.6098	0	1	1	no
13101.m04433	LOC_Os01g43010.2	=	transposon protein, putative, unclassified, expressed	chr01:24470877-24496851	LOWDATA	0.329804	0.14159	-1.21989	0	1	1	no	LOWDATA	0.129676	0.28161	1.11879	0	1	1	no	LOWDATA	0.20691	0.260495	0.332254	0	1	1	no	LOWDATA	0.125301	0.274278	1.13024	0	1	1	no
13101.m04524	LOC_Os01g43700.2	=	cytochrome P450 72A1, putative, expressed	chr01:25028749-25043006	LOWDATA	2.01868	0.949018	-1.0889	0	1	1	no	OK	4.70268	3.34489	-0.491526	0.773516	0.439217	0.739018	no	LOWDATA	1.32842	0.328472	-2.01587	0	1	1	no	NOTEST	1.16898	1.6718	0.516149	-0.0298672	0.976173	1	no
13101.m04562	LOC_Os01g44040.2	=	CAS1 domain-containing protein 1 precursor, putative, expressed	chr01:25225620-25232734	LOWDATA	0.626969	0.443506	-0.499443	0	1	1	no	NOTEST	0.886676	0.126196	-2.81275	0.119293	0.905043	1	no	LOWDATA	0.361868	0.440751	0.284503	0	1	1	no	LOWDATA	0.189586	0.147555	-0.361598	0	1	1	no
13101.m04608	LOC_Os01g44970.1	=	polygalacturonase, putative, expressed	chr01:25512687-25588130	LOWDATA	3.62452	1.7778	-1.0277	0	1	1	no	LOWDATA	5.0429	2.97905	-0.759399	0	1	1	no	LOWDATA	0.886887	2.17149	1.29186	0	1	1	no	LOWDATA	5.50845	0.602255	-3.1932	0	1	1	no
13101.m04615	LOC_Os01g45030.1	=	retrotransposon protein, putative, Ty3-gypsy subclass	chr01:25512687-25588130	LOWDATA	0.436569	0.656126	0.587763	0	1	1	no	LOWDATA	0.000546913	0.00130272	1.25214	0	1	1	no	LOWDATA	0.0931622	0.248917	1.41784	0	1	1	no	NOTEST	0	0	0	0	1	1	no
13101.m04618	LOC_Os01g45060.1	=	polygalacturonase, putative	chr01:25512687-25588130	LOWDATA	1.21657	0.687317	-0.823769	0	1	1	no	LOWDATA	2.01282	0.636583	-1.6608	0	1	1	no	LOWDATA	0.215554	1.23849	2.52246	0	1	1	no	LOWDATA	1.30073	2.44228	0.908907	0	1	1	no
13101.m04640	LOC_Os01g45274.2	=	carbonic anhydrase, chloroplast precursor, putative, expressed	chr01:25691672-25749753	LOWDATA	18.2598	18.3112	0.00405829	0	1	1	no	LOWDATA	12.5078	3.52558	-1.8269	0	1	1	no	LOWDATA	18.9523	26.3613	0.476048	0	1	1	no	LOWDATA	6.52854	2.22915	-1.55026	0	1	1	no
13101.m04642	LOC_Os01g45274.3	=	carbonic anhydrase, chloroplast precursor, putative, expressed	chr01:25691672-25749753	LOWDATA	24.3835	12.8089	-0.928759	0	1	1	no	LOWDATA	55.0502	43.3667	-0.34416	0	1	1	no	LOWDATA	15.1052	0.29448	-5.68073	0	1	1	no	LOWDATA	56.2499	46.7436	-0.26708	0	1	1	no
13101.m04643	LOC_Os01g45274.1	=	carbonic anhydrase, chloroplast precursor, putative, expressed	chr01:25691672-25749753	LOWDATA	180.385	45.9907	-1.97167	0	1	1	no	LOWDATA	338.745	218.75	-0.63092	0	1	1	no	LOWDATA	113.02	38.8785	-1.53954	0	1	1	no	LOWDATA	194.806	142.295	-0.453151	0	1	1	no
13101.m04641	LOC_Os01g45274.4	=	carbonic anhydrase, chloroplast precursor, putative, expressed	chr01:25691672-25749753	LOWDATA	54.3439	6.33176	-3.10144	0	1	1	no	LOWDATA	417.136	0.997288	-8.70829	0	1	1	no	LOWDATA	478.65	32.3153	-3.88868	0	1	1	no	LOWDATA	175.408	62.0009	-1.50035	0	1	1	no
13101.m04644	LOC_Os01g45290.1	=	retrotransposon protein, putative, unclassified, expressed	chr01:25691672-25749753	LOWDATA	0.0245821	0.024386	-0.0115542	0	1	1	no	LOWDATA	0.107205	0.043214	-1.31079	0	1	1	no	LOWDATA	0.00698072	0.00449302	-0.63569	0	1	1	no	NOTEST	0.00652522	0.019629	1.58889	-0.152808	0.87855	1	no
13101.m04645	LOC_Os01g45310.1	=	retrotransposon protein, putative, Ty3-gypsy subclass	chr01:25691672-25749753	LOWDATA	0.105538	0.121392	0.201914	0	1	1	no	LOWDATA	0.062252	0.0343944	-0.855947	0	1	1	no	NOTEST	0	0	0	0	1	1	no	NOTEST	0.0936986	0	-1e+300	-1e+300	0.112442	1	no
13101.m04743	LOC_Os01g46169.3	=	GDSL-like lipase/acylhydrolase, putative, expressed	chr01:26248283-26273140	LOWDATA	0.345448	0.344127	-0.00552624	0	1	1	no	NOTEST	0.255387	0	0	0	1	1	no	LOWDATA	0.318363	0.48864	0.618102	0	1	1	no	LOWDATA	0.0974052	0.143506	0.559038	0	1	1	no
13101.m15053	LOC_Os01g46570.3	=	CTP synthase, putative, expressed	chr01:26513456-26536147	LOWDATA	1.93674	1.17063	-0.726348	0	1	1	no	NOTEST	0.550691	0	0	0	1	1	no	LOWDATA	2.93941	6.71168	1.19115	0	1	1	no	OK	6.32278	1.42348	-2.15114	0.615709	0.538087	1	no
13101.m04790	LOC_Os01g46580.1	=	actin-related protein 2/3 complex subunit 2, putative, expressed	chr01:26513456-26536147	LOWDATA	10.2502	14.4532	0.495732	0	1	1	no	OK	8.00821	9.47843	0.243169	-0.16514	0.868833	0.972766	no	LOWDATA	5.80834	9.15755	0.656835	0	1	1	no	OK	8.48578	9.38333	0.145052	-0.218094	0.827356	1	no
13101.m04807	LOC_Os01g46750.1	=	AMP-binding enzyme, putative, expressed	chr01:26627844-26635905	LOWDATA	25.2034	30.967	0.297112	0	1	1	no	OK	23.7571	12.8931	-0.881758	1.55759	0.119331	0.41046	no	OK	19.1878	32.9265	0.779063	-1.41254	0.15779	0.667878	no	LOWDATA	25.9451	29.956	0.207384	0	1	1	no
13101.m04891	LOC_Os01g47420.3	=	pterin-4-alpha-carbinolamine dehydratase, putative, expressed	chr01:27094413-27108972	LOWDATA	0.843395	0.509738	-0.726452	0	1	1	no	LOWDATA	0.947845	0.237053	-1.99944	0	1	1	no	LOWDATA	0.845063	0.709391	-0.252478	0	1	1	no	LOWDATA	0.519727	1.00601	0.952822	0	1	1	no
13101.m05015	LOC_Os01g48360.1	=	expressed protein	chr01:27710538-27714275	LOWDATA	0.89175	1.57022	0.816254	0	1	1	no	NOTEST	0.598736	0	0	0	1	1	no	LOWDATA	0.530632	1.20218	1.17987	0	1	1	no	NOTEST	0.855472	2.32062	1.43972	-0.614945	0.538591	1	no
13101.m05060	LOC_Os01g48760.1	=	THAP domain-containing protein 4, putative, expressed	chr01:27960694-27964400	LOWDATA	15.3756	16.8736	0.134123	0	1	1	no	LOWDATA	16.7636	12.9644	-0.370772	0	1	1	no	OK	16.9929	13.6326	-0.317874	0.600761	0.547999	1	no	LOWDATA	12.9609	16.2708	0.328117	0	1	1	no
13101.m05082	LOC_Os01g48930.1	=	splicing factor-related, putative, expressed	chr01:28079347-28082344	LOWDATA	26.159	42.608	0.703816	0	1	1	no	LOWDATA	33.1152	45.7634	0.4667	0	1	1	no	OK	16.7479	28.5828	0.771166	-1.73306	0.0830855	0.489029	no	OK	24.6066	31.4669	0.354788	-0.90962	0.363023	1	no
13101.m05115	LOC_Os01g49200.1	=	microtubule associated protein, putative, expressed	chr01:28260156-28292786	LOWDATA	9.96789	3.86731	-1.36596	0	1	1	no	LOWDATA	11.3415	4.215	-1.428	0	1	1	no	OK	7.88842	4.62818	-0.769293	1.1786	0.238558	0.789804	no	LOWDATA	13.3032	6.13384	-1.11691	0	1	1	no
13101.m05147	LOC_Os01g49510.1	=	OsPOP3 - Putative Prolyl Oligopeptidase homologue, expressed	chr01:28478088-28495299	LOWDATA	4.48834	7.98537	0.831176	0	1	1	no	LOWDATA	4.73977	4.73665	-0.000948259	0	1	1	no	LOWDATA	4.18589	7.14821	0.772048	0	1	1	no	LOWDATA	5.31279	5.56353	0.0665303	0	1	1	no
13101.m05495	LOC_Os01g52500.4	=	NADP-dependent malic enzyme, putative, expressed	chr01:30137787-30183543	LOWDATA	1.39782	14.2199	3.34666	0	1	1	no	OK	14.8352	1.16033	-3.67642	0.440545	0.659542	0.873741	no	OK	23.1963	6.35007	-1.86905	0.919041	0.358074	0.904406	no	NOTEST	0.632616	0	0	0	1	1	no
13101.m05493	LOC_Os01g52500.2	=	NADP-dependent malic enzyme, putative, expressed	chr01:30137787-30183543	LOWDATA	43.1256	43.679	0.0183942	0	1	1	no	OK	24.0509	27.6606	0.20174	-0.390727	0.695999	0.894355	no	LOWDATA	19.2317	56.0633	1.54357	0	1	1	no	OK	43.9131	55.5641	0.339502	-1.08141	0.279516	0.953218	no
13101.m05497	LOC_Os01g52500.3	=	NADP-dependent malic enzyme, putative, expressed	chr01:30137787-30183543	LOWDATA	1.73676	2.53078	0.543181	0	1	1	no	OK	3.19	6.63311	1.05613	-0.336205	0.736716	0.912888	no	LOWDATA	0.814947	0.865081	0.0861285	0	1	1	no	NOTEST	2.34017	0.30376	-2.94561	0.0816552	0.934921	1	no
13101.m05496	LOC_Os01g52500.5	=	NADP-dependent malic enzyme, putative, expressed	chr01:30137787-30183543	LOWDATA	1.8824	4.40567	1.22679	0	1	1	no	LOWDATA	2.86981	2.26612	-0.340728	0	1	1	no	OK	1.64083	3.15919	0.945131	-0.161372	0.8718	1	no	LOWDATA	2.41216	3.55462	0.559369	0	1	1	no
13101.m05498	LOC_Os01g52514.1	=	B3 DNA binding domain containing protein, expressed	chr01:30137787-30183543	LOWDATA	1.01783	0.90567	-0.168432	0	1	1	no	LOWDATA	0.491316	0.579427	0.237975	0	1	1	no	LOWDATA	1.07754	1.74712	0.697231	0	1	1	no	LOWDATA	0.768215	0.644096	-0.254234	0	1	1	no
13101.m05499	LOC_Os01g52530.1	=	phosphoribosyl transferase, putative, expressed	chr01:30137787-30183543	LOWDATA	5.74717	14.7415	1.35896	0	1	1	no	LOWDATA	6.03029	2.59878	-1.21439	0	1	1	no	OK	5.4842	13.576	1.30771	-0.759805	0.447371	0.957948	no	LOWDATA	4.90674	9.51435	0.95534	0	1	1	no
13101.m05567	LOC_Os01g53150.1	=	GTPase of unknown function domain containing protein, putative, expressed	chr01:30531863-30540827	LOWDATA	0.280348	0.2736	-0.0351458	0	1	1	no	LOWDATA	0.596483	0.313321	-0.92884	0	1	1	no	LOWDATA	0.108911	0.184793	0.762758	0	1	1	no	LOWDATA	0.354948	0.186258	-0.930304	0	1	1	no
13101.m05696	LOC_Os01g54240.2	=	nucleoporin, putative, expressed	chr01:31202398-31210231	LOWDATA	0.124978	0.28263	1.17724	0	1	1	no	LOWDATA	0.660792	0.121345	-2.44509	0	1	1	no	NOTEST	0.362711	0	0	0	1	1	no	NOTEST	0	0	0	0	1	1	no
13101.m05734	LOC_Os01g54550.1	=	HSF-type DNA-binding domain containing protein, expressed	chr01:31353241-31391191	LOWDATA	6.34466	8.38031	0.401462	0	1	1	no	OK	6.4055	4.08907	-0.647539	0.917488	0.358887	0.680262	no	LOWDATA	4.49535	8.63283	0.941399	0	1	1	no	OK	5.89996	7.53947	0.353758	-0.483318	0.62887	1	no
13101.m05738	LOC_Os01g54570.1	=	DUF623 domain containing protein	chr01:31353241-31391191	LOWDATA	1.5164	1.77894	0.230367	0	1	1	no	LOWDATA	0.547931	0.867491	0.662855	0	1	1	no	LOWDATA	1.78743	1.75822	-0.0237712	0	1	1	no	LOWDATA	1.4243	1.87272	0.394877	0	1	1	no
13101.m05934	LOC_Os01g56160.1	=	hypothetical protein	chr01:32333560-32349094	LOWDATA	0.127374	0.526491	2.04734	0	1	1	no	NOTEST	0.555487	0.678683	0.288985	-0.156705	0.875477	1	no	NOTEST	0.271343	0.11643	-1.22065	1.11074	0.266682	1	no	LOWDATA	0.169091	0.339101	1.00392	0	1	1	no
13101.m05936	LOC_Os01g56180.1	=	expressed protein	chr01:32333560-32349094	LOWDATA	4.8155	11.8902	1.30401	0	1	1	no	OK	3.89559	24.9569	2.67953	-3.58943	0.000331406	0.00981501	yes	LOWDATA	3.14778	10.5934	1.75075	0	1	1	no	LOWDATA	4.53244	22.3332	2.30083	0	1	1	no
13101.m05999	LOC_Os01g56630.1	=	dymeclin, putative, expressed	chr01:32659553-32680384	LOWDATA	3.81977	5.6725	0.570496	0	1	1	no	NOTEST	2.53426	1.36812	-0.889364	0.792126	0.428287	1	no	LOWDATA	2.57484	2.67545	0.0552995	0	1	1	no	NOTEST	0.660264	3.64175	2.46352	-3.51657	0.000437158	1	no
13101.m06009	LOC_Os01g56690.1	=	helix-loop-helix DNA-binding domain containing protein, expressed	chr01:32697979-32756754	LOWDATA	0.919119	2.38157	1.37359	0	1	1	no	NOTEST	0.0745708	0	0	0	1	1	no	LOWDATA	0.198244	1.50732	2.92664	0	1	1	no	NOTEST	0	0	0	0	1	1	no
13101.m06036	LOC_Os01g56900.2	=	expressed protein	chr01:32859887-32877926	LOWDATA	0.123892	0.185028	0.578655	0	1	1	no	LOWDATA	0.238462	0.313236	0.393489	0	1	1	no	NOTEST	0	0	0	0	1	1	no	NOTEST	0.0869854	0	0	0	1	1	no
13101.m06069	LOC_Os01g57220.2	=	secretory carrier-associated membrane protein, putative, expressed	chr01:33058142-33066790	LOWDATA	0.50479	0.75369	0.578287	0	1	1	no	NOTEST	0	0	0	0	1	1	no	NOTEST	0.868891	0	-1e+300	-1e+300	0.00651175	1	no	NOTEST	0.57007	2.20135	1.94918	-0.214756	0.829958	1	no
13101.m06102	LOC_Os01g57520.1	=	hypothetical protein	chr01:33214662-33247364	LOWDATA	0.811664	0.759413	-0.0959991	0	1	1	no	LOWDATA	0.83473	0.794227	-0.0717599	0	1	1	no	LOWDATA	0.0818016	0.200967	1.29676	0	1	1	no	NOTEST	0	0	0	0	1	1	no
13101.m06256	LOC_Os01g58890.3	=	cysteine proteinase inhibitor precursor protein, putative, expressed	chr01:34032111-34033896	LOWDATA	0.12718	0.541471	2.09002	0	1	1	no	LOWDATA	0.525433	0.740498	0.49499	0	1	1	no	NOTEST	0.15119	0	0	0	1	1	no	NOTEST	0	0	0	0	1	1	no
13101.m06277	LOC_Os01g59100.1	=	cytokinin-N-glucosyltransferase 1, putative, expressed	chr01:34129825-34144177	LOWDATA	0.758983	1.37672	0.859097	0	1	1	no	LOWDATA	1.36745	0.566517	-1.2713	0	1	1	no	LOWDATA	0.278186	1.06604	1.93815	0	1	1	no	LOWDATA	0.458629	0.507777	0.146867	0	1	1	no
13101.m06337	LOC_Os01g59600.2	=	peptidase, T1 family, putative, expressed	chr01:34444699-34474585	LOWDATA	3.20478	1.64696	-0.960424	0	1	1	no	OK	7.50536	2.77208	-1.43695	1.22816	0.219389	0.547733	no	OK	3.85347	3.46448	-0.153518	0.0512476	0.959128	1	no	NOTEST	0	0	0	0	1	1	no
13101.m06537	LOC_Os01g61410.4	=	NADH-ubiquinone oxidoreductase, mitochondrial precursor, putative, expressed	chr01:35504397-35523492	LOWDATA	0.457063	0.919914	1.0091	0	1	1	no	LOWDATA	0.426362	0.214858	-0.988694	0	1	1	no	LOWDATA	0.229592	0.903227	1.97602	0	1	1	no	LOWDATA	0.201254	0.485313	1.2699	0	1	1	no
13101.m06623	LOC_Os01g61980.1	=	expressed protein	chr01:35869930-36045572	LOWDATA	1.35188	1.82428	0.432364	0	1	1	no	LOWDATA	0.520203	0.381294	-0.448172	0	1	1	no	LOWDATA	1.59502	1.67164	0.0676927	0	1	1	no	NOTEST	0.870809	2.15913	1.31002	-0.805718	0.420406	1	no
13101.m06626	LOC_Os01g62010.1	=	hydrolase, alpha/beta fold family domain containing protein, expressed	chr01:35869930-36045572	LOWDATA	1.09388	0.799954	-0.451466	0	1	1	no	LOWDATA	1.79403	0.941447	-0.930254	0	1	1	no	LOWDATA	1.75254	1.99962	0.19028	0	1	1	no	NOTEST	2.42003	0.940779	-1.3631	1.2518	0.210641	1	no
13101.m06628	LOC_Os01g62020.1	=	NAD dependent epimerase/dehydratase family domain containing protein, expressed	chr01:35869930-36045572	LOWDATA	21.4363	20.7794	-0.0449001	0	1	1	no	LOWDATA	32.0593	21.5188	-0.575145	0	1	1	no	LOWDATA	23.1044	21.4312	-0.108456	0	1	1	no	OK	33.2129	33.353	0.00607517	-0.00582662	0.995351	1	no
13101.m06627	LOC_Os01g62020.2	=	NAD dependent epimerase/dehydratase family domain containing protein, expressed	chr01:35869930-36045572	LOWDATA	2.89871	1.00403	-1.52961	0	1	1	no	LOWDATA	1.28065	0.786152	-0.703998	0	1	1	no	LOWDATA	0.299931	0.935513	1.64113	0	1	1	no	NOTEST	2.20577	1.198	-0.880652	0.174752	0.861274	1	no
13101.m06632	LOC_Os01g62040.3	=	ruvB-like, putative, expressed	chr01:35869930-36045572	LOWDATA	3.98161	3.74171	-0.0896561	0	1	1	no	LOWDATA	0.904346	3.56558	1.97919	0	1	1	no	LOWDATA	1.11323	0.836819	-0.411761	0	1	1	no	LOWDATA	0.70216	0.590979	-0.248694	0	1	1	no
13101.m06631	LOC_Os01g62040.1	=	ruvB-like, putative, expressed	chr01:35869930-36045572	LOWDATA	15.1	18.6067	0.301279	0	1	1	no	LOWDATA	14.365	7.85689	-0.870531	0	1	1	no	LOWDATA	12.303	17.2197	0.485048	0	1	1	no	OK	15.629	16.2353	0.0549091	-0.106292	0.915351	1	no
13101.m06635	LOC_Os01g62060.1	=	plant-specific domain TIGR01589 family protein, expressed	chr01:35869930-36045572	LOWDATA	2.71488	20.9951	2.95109	0	1	1	no	LOWDATA	15.9899	16.9256	0.0820478	0	1	1	no	LOWDATA	9.22479	9.23749	0.0019844	0	1	1	no	LOWDATA	6.07822	9.9637	0.713032	0	1	1	no
13101.m06643	LOC_Os01g62100.1	=	retrotransposon protein, putative, unclassified	chr01:35869930-36045572	LOWDATA	0.0135761	0.00280579	-2.27459	0	1	1	no	NOTEST	0.013157	0	0	0	1	1	no	NOTEST	0	0	0	0	1	1	no	NOTEST	0.00600614	0	0	0	1	1	no
13101.m06645	LOC_Os01g62120.1	=	hypothetical protein	chr01:35869930-36045572	LOWDATA	1.81377	3.12379	0.784305	0	1	1	no	LOWDATA	1.46482	2.09464	0.515986	0	1	1	no	LOWDATA	0.572618	1.28994	1.17166	0	1	1	no	NOTEST	1.0705	2.57619	1.26695	-0.836515	0.402865	1	no
13101.m06649	LOC_Os01g62150.1	=	clathrin adaptor complex small chain domain containing protein, expressed	chr01:35869930-36045572	LOWDATA	2.87312	5.58863	0.959876	0	1	1	no	LOWDATA	5.18287	4.4147	-0.231438	0	1	1	no	LOWDATA	5.37241	6.62046	0.301362	0	1	1	no	LOWDATA	7.10396	7.48463	0.0753071	0	1	1	no
13101.m06648	LOC_Os01g62150.2	=	clathrin adaptor complex small chain domain containing protein, expressed	chr01:35869930-36045572	LOWDATA	1.97799	0.139101	-3.82983	0	1	1	no	LOWDATA	0.445724	0.451894	0.0198365	0	1	1	no	LOWDATA	0.781928	0.713583	-0.131956	0	1	1	no	NOTEST	0.65533	0	0	0	1	1	no
13101.m06653	LOC_Os01g62190.1	=	ZOS1-15 - C2H2 zinc finger protein, expressed	chr01:35869930-36045572	LOWDATA	2.44921	16.8481	2.7822	0	1	1	no	LOWDATA	0.623719	3.14332	2.33332	0	1	1	no	LOWDATA	1.84066	13.4811	2.87265	0	1	1	no	OK	1.92226	8.70939	2.17977	-1.91259	0.0558009	0.453328	no
13101.m06655	LOC_Os01g62210.1	=	50S ribosomal protein L17, putative, expressed	chr01:35869930-36045572	LOWDATA	9.73278	11.58	0.250706	0	1	1	no	LOWDATA	10.452	6.66827	-0.648394	0	1	1	no	LOWDATA	13.3487	21.1113	0.661311	0	1	1	no	OK	20.3672	20.358	-0.000650113	0.00126958	0.998987	1	no
13101.m06657	LOC_Os01g62220.1	=	pentatricopeptide, putative	chr01:35869930-36045572	LOWDATA	0.222059	0.175229	-0.341703	0	1	1	no	LOWDATA	0.29346	0.161324	-0.863206	0	1	1	no	LOWDATA	0.128997	0.166053	0.36431	0	1	1	no	NOTEST	0.241158	0.193451	-0.318009	0.105458	0.916012	1	no
13101.m06665	LOC_Os01g62290.2	=	DnaK family protein, putative, expressed	chr01:35869930-36045572	LOWDATA	18.3875	31.179	0.761849	0	1	1	no	LOWDATA	13.8603	34.3139	1.30783	0	1	1	no	LOWDATA	10.6375	25.5012	1.2614	0	1	1	no	OK	9.16967	26.6458	1.53897	-1.64956	0.0990333	0.619221	no
13101.m06842	LOC_Os01g63770.1	=	transmembrane amino acid transporter protein, putative, expressed	chr01:36997294-37012543	LOWDATA	17.5675	12.8005	-0.456706	0	1	1	no	OK	20.6225	14.3485	-0.523325	0.904934	0.3655	0.683739	no	OK	16.6742	14.9479	-0.15768	0.249115	0.803272	1	no	OK	18.6351	21.6957	0.219389	-0.419366	0.674948	1	no
13101.m06845	LOC_Os01g63790.1	=	prolipoprotein diacylglyceryl transferase, putative, expressed	chr01:36997294-37012543	LOWDATA	0.050006	0.0614708	0.297802	0	1	1	no	NOTEST	0	0	0	0	1	1	no	NOTEST	0	0	0	0	1	1	no	NOTEST	0	0	0	0	1	1	no
13101.m06887	LOC_Os01g64040.1	=	expressed protein	chr01:37197289-37236314	LOWDATA	3.43329	3.38689	-0.0196312	0	1	1	no	OK	0.574426	6.70826	3.54575	-1.55732	0.119395	0.410541	no	OK	0	0	0	0	1	1	no	OK	1.68306	6.43184	1.93415	-1.41625	0.156703	0.760067	no
13101.m06903	LOC_Os01g64170.4	=	glycosyl hydrolases family 17, putative, expressed	chr01:37268679-37273670	LOWDATA	0.436509	1.43263	1.71458	0	1	1	no	LOWDATA	0.939418	0.775827	-0.276033	0	1	1	no	LOWDATA	0.490938	1.55094	1.65953	0	1	1	no	NOTEST	0.383606	0	0	0	1	1	no
13101.m06937	LOC_Os01g64460.1	=	hypothetical protein	chr01:37395101-37410707	LOWDATA	3.24715	3.54856	0.128056	0	1	1	no	LOWDATA	2.91885	2.40579	-0.27889	0	1	1	no	LOWDATA	1.03209	0.205418	-2.32894	0	1	1	no	LOWDATA	0.514372	1.73096	1.75069	0	1	1	no
13101.m07015	LOC_Os01g64990.2	=	GPI transamidase subunit PIG-U domain containing protein, expressed	chr01:37721266-37733653	LOWDATA	0.116082	0.125728	0.115157	0	1	1	no	LOWDATA	0.193871	0.117134	-0.726934	0	1	1	no	NOTEST	0.0807698	0.199328	1.30326	-0.901488	0.367329	1	no	NOTEST	0.0458404	0	0	0	1	1	no
13101.m07027	LOC_Os01g65090.1	=	aminotransferase, classes I and II, domain containing protein, expressed	chr01:37778264-37867509	LOWDATA	14.9954	18.2878	0.286365	0	1	1	no	LOWDATA	13.6647	11.9853	-0.189181	0	1	1	no	LOWDATA	6.73421	14.0519	1.06119	0	1	1	no	LOWDATA	14.9731	17.8724	0.255362	0	1	1	no
13101.m07032	LOC_Os01g65100.3	=	peptide transporter, putative, expressed	chr01:37778264-37867509	LOWDATA	0.76629	2.10072	1.45492	0	1	1	no	LOWDATA	4.97458	1.35047	-1.88112	0	1	1	no	LOWDATA	0.326253	1.07081	1.71464	0	1	1	no	LOWDATA	1.04754	1.55359	0.568597	0	1	1	no
13101.m07030	LOC_Os01g65100.1	=	peptide transporter, putative, expressed	chr01:37778264-37867509	LOWDATA	6.66141	10.2468	0.621278	0	1	1	no	LOWDATA	1.1008	11.2366	3.35157	0	1	1	no	LOWDATA	3.35236	3.40531	0.0226089	0	1	1	no	LOWDATA	4.23423	4.06076	-0.0603526	0	1	1	no
13101.m07031	LOC_Os01g65100.2	=	peptide transporter, putative, expressed	chr01:37778264-37867509	LOWDATA	9.73899	3.17675	-1.61622	0	1	1	no	LOWDATA	15.7125	9.67179	-0.700054	0	1	1	no	LOWDATA	10.4262	8.88723	-0.230413	0	1	1	no	LOWDATA	15.7086	19.9995	0.348402	0	1	1	no
13101.m07033	LOC_Os01g65110.1	=	POT family protein, expressed	chr01:37778264-37867509	LOWDATA	2.28443	1.36007	-0.748152	0	1	1	no	LOWDATA	2.05142	2.19954	0.100581	0	1	1	no	LOWDATA	2.16252	1.99842	-0.113856	0	1	1	no	LOWDATA	2.00904	3.94967	0.975225	0	1	1	no
13101.m07034	LOC_Os01g65120.1	=	peptide transporter, putative	chr01:37778264-37867509	LOWDATA	0.0184769	0.11456	2.6323	0	1	1	no	NOTEST	0	0	0	0	1	1	no	LOWDATA	0.052474	0.033774	-0.63569	0	1	1	no	LOWDATA	0.0245249	0.0885298	1.85192	0	1	1	no
13101.m07035	LOC_Os01g65130.1	=	peptide transporter, putative, expressed	chr01:37778264-37867509	LOWDATA	0.0910985	0.0981698	0.107852	0	1	1	no	LOWDATA	0.128388	0.0724876	-0.82471	0	1	1	no	LOWDATA	0.0383688	0.0442802	0.20673	0	1	1	no	LOWDATA	0.0660933	0.0191156	-1.78975	0	1	1	no
13101.m07037	LOC_Os01g65150.1	=	proton-dependent oligopeptide transport, putative, expressed	chr01:37778264-37867509	LOWDATA	0.526124	0.615076	0.225362	0	1	1	no	LOWDATA	1.34884	0.292646	-2.20449	0	1	1	no	LOWDATA	0.467797	0.608946	0.380429	0	1	1	no	LOWDATA	0.904021	0.501323	-0.850616	0	1	1	no
13101.m07039	LOC_Os01g65190.1	=	POT domain containing peptide transporter, putative, expressed	chr01:37778264-37867509	LOWDATA	0.262168	0.63119	1.26758	0	1	1	no	LOWDATA	1.20276	1.08433	-0.149547	0	1	1	no	LOWDATA	0.197493	0.129128	-0.613	0	1	1	no	LOWDATA	0.550277	0.606754	0.140954	0	1	1	no
13101.m07103	LOC_Os01g65700.1	=	expressed protein	chr01:38138056-38170866	LOWDATA	0.310959	2.4799	2.99549	0	1	1	no	LOWDATA	0.389118	0.381288	-0.0293235	0	1	1	no	LOWDATA	0.628876	2.05027	1.70497	0	1	1	no	LOWDATA	0.410446	1.38398	1.75356	0	1	1	no
13101.m07127	LOC_Os01g65890.1	=	DNA repair metallo-beta-lactamase, putative, expressed	chr01:38237431-38278058	LOWDATA	2.51371	3.49414	0.475119	0	1	1	no	NOTEST	2.40173	1.52271	-0.657431	0.638907	0.522883	1	no	NOTEST	1.38885	1.8434	0.408477	-0.345871	0.72944	1	no	NOTEST	1.5471	1.42451	-0.119105	0.173884	0.861956	1	no
13101.m07138	LOC_Os01g65992.1	=	expressed protein	chr01:38286839-38323127	LOWDATA	4.44615	5.03516	0.179482	0	1	1	no	LOWDATA	5.0316	2.09165	-1.26638	0	1	1	no	LOWDATA	1.90762	2.07879	0.123969	0	1	1	no	LOWDATA	1.4912	2.44163	0.711367	0	1	1	no
13101.m07180	LOC_Os01g66310.1	=	expressed protein	chr01:38514407-38515946	LOWDATA	1.46177	0.662564	-1.14159	0	1	1	no	LOWDATA	1.21621	1.34628	0.146586	0	1	1	no	LOWDATA	0.441791	0.220882	-1.00009	0	1	1	no	LOWDATA	0.41019	0.58016	0.500156	0	1	1	no
13101.m07274	LOC_Os01g67090.1	=	IQ calmodulin-binding motif domain containing protein, expressed	chr01:38945432-38975514	LOWDATA	15.527	6.04982	-1.35982	0	1	1	no	LOWDATA	16.3936	5.8336	-1.49068	0	1	1	no	LOWDATA	13.3234	15.0616	0.176913	0	1	1	no	LOWDATA	21.1908	11.798	-0.844894	0	1	1	no
13101.m07275	LOC_Os01g67100.1	=	expressed protein	chr01:38945432-38975514	LOWDATA	0.792751	0.896225	0.176992	0	1	1	no	NOTEST	1.62208	0	0	0	1	1	no	NOTEST	0.935825	0	0	0	1	1	no	NOTEST	0	0	0	0	1	1	no
13101.m07281	LOC_Os01g67134.1	=	ribosomal L18p/L5e family protein, putative, expressed	chr01:38945432-38975514	LOWDATA	7.12274	16.2018	1.18565	0	1	1	no	LOWDATA	14.9787	11.1782	-0.422218	0	1	1	no	LOWDATA	26.5914	35.0223	0.397314	0	1	1	no	LOWDATA	35.679	16.8825	-1.07955	0	1	1	no
13101.m07305	LOC_Os01g67320.1	=	expressed protein	chr01:39077512-39081461	LOWDATA	0.688991	0.142622	-2.27229	0	1	1	no	LOWDATA	0.490982	0.127005	-1.95079	0	1	1	no	NOTEST	0.575558	0	0	0	1	1	no	NOTEST	0	0	0	0	1	1	no
13101.m07465	LOC_Os01g68510.1	=	peptide transporter PTR2, putative, expressed	chr01:39809259-39818517	LOWDATA	0.0584379	0.109573	0.90691	0	1	1	no	NOTEST	0.140987	0	0	0	1	1	no	NOTEST	0.0125247	0.0633052	2.33754	-0.397735	0.690825	1	no	NOTEST	0.0273133	0.0250295	-0.125972	0.0690527	0.944948	1	no
13101.m07498	LOC_Os01g68790.1	=	RNA recognition motif containing protein, putative, expressed	chr01:39953485-39955641	LOWDATA	1.12312	0.164095	-2.77491	0	1	1	no	LOWDATA	0.900652	0.210952	-2.09406	0	1	1	no	LOWDATA	0.293432	0.696316	1.24671	0	1	1	no	NOTEST	0.18936	0	0	0	1	1	no
13101.m07510	LOC_Os01g68870.2	=	leucine-rich repeat receptor protein kinase EXS precursor, putative, expressed	chr01:40015557-40022818	LOWDATA	0.885558	1.68785	0.930526	0	1	1	no	NOTEST	1.37364	0.943494	-0.541914	0.350705	0.72581	1	no	LOWDATA	1.30784	1.8334	0.487341	0	1	1	no	NOTEST	1.24789	1.47631	0.242507	-0.175604	0.860605	1	no
13101.m07632	LOC_Os01g70270.3	=	auxin response factor, putative, expressed	chr01:40694379-40711970	LOWDATA	1.08731	3.47163	1.67485	0	1	1	no	LOWDATA	3.96999	0.64316	-2.62589	0	1	1	no	OK	1.13081	2.33573	1.04651	-0.184907	0.853302	1	no	LOWDATA	1.53232	0.440744	-1.79771	0	1	1	no
13101.m07633	LOC_Os01g70280.1	=	hypothetical protein	chr01:40694379-40711970	LOWDATA	0.169267	0.671668	1.98845	0	1	1	no	NOTEST	0	0	0	0	1	1	no	NOTEST	0.0480758	0.309432	2.68624	-1.88086	0.0599907	1	no	NOTEST	0	0.216292	1e+300	1e+300	0.0368191	1	no
13101.m07634	LOC_Os01g70290.1	=	hypothetical protein	chr01:40694379-40711970	LOWDATA	0.0498618	0.154575	1.6323	0	1	1	no	NOTEST	0.0362418	0	0	0	1	1	no	NOTEST	0.035403	0.091146	1.36431	-0.176958	0.859542	1	no	NOTEST	0.0661854	0.0398193	-0.733047	0.126597	0.89926	1	no
13101.m07688	LOC_Os01g70700.1	=	conserved hypothetical protein	chr01:40908548-40931690	LOWDATA	0.494796	1.06984	1.11248	0	1	1	no	NOTEST	0.284077	0.150544	-0.916099	0.0653941	0.94786	1	no	LOWDATA	0.0573268	0.413272	2.84981	0	1	1	no	NOTEST	0.0436214	0.169235	1.95592	-0.0720796	0.942539	1	no
13101.m07753	LOC_Os01g71200.1	=	RNA recognition motif containing protein, putative, expressed	chr01:41192234-41218746	LOWDATA	12.1746	5.93662	-1.03617	0	1	1	no	LOWDATA	12.1961	5.84242	-1.06178	0	1	1	no	LOWDATA	6.08357	6.24673	0.0381828	0	1	1	no	LOWDATA	17.8231	12.4908	-0.512884	0	1	1	no
13101.m07756	LOC_Os01g71230.1	=	nascent polypeptide-associated complex subunit alpha-like protein 3, putative, expressed	chr01:41192234-41218746	LOWDATA	110.629	74.192	-0.576398	0	1	1	no	OK	65.0034	52.9551	-0.295747	0.595612	0.551435	0.813761	no	LOWDATA	60.0759	106.768	0.829615	0	1	1	no	LOWDATA	114.283	103.012	-0.149799	0	1	1	no
13101.m07979	LOC_Os01g73100.1	=	retrotransposon protein, putative, unclassified	chr01:42402914-42426353	LOWDATA	0.106154	0.130064	0.293068	0	1	1	no	NOTEST	0.205636	0.7373	1.84216	-0.113494	0.909639	1	no	LOWDATA	0.0662873	0.311017	2.23019	0	1	1	no	LOWDATA	0.483062	0.116482	-2.0521	0	1	1	no
13101.m08015	LOC_Os01g73460.1	=	ATXR, putative, expressed	chr01:42566788-42596958	LOWDATA	1.31127	1.38959	0.0836932	0	1	1	no	LOWDATA	2.03338	1.26838	-0.680892	0	1	1	no	LOWDATA	1.51588	1.6659	0.136153	0	1	1	no	NOTEST	2.06482	1.94709	-0.0846966	0.0110596	0.991176	1	no
13101.m08037	LOC_Os01g73650.1	=	hypothetical protein	chr01:42662056-42670548	LOWDATA	0.482888	0.642955	0.41303	0	1	1	no	NOTEST	0	0	0	0	1	1	no	NOTEST	0	0	0	0	1	1	no	NOTEST	0	0	0	0	1	1	no
13101.m08081	LOC_Os01g73980.1	=	xylem cysteine proteinase 2 precursor, putative, expressed	chr01:42854571-42856422	LOWDATA	21.2445	21.5167	0.0183712	0	1	1	no	LOWDATA	32.7647	33.822	0.0458219	0	1	1	no	LOWDATA	19.8614	26.3137	0.405846	0	1	1	no	LOWDATA	43.2967	56.5109	0.384272	0	1	1	no
13101.m08117	LOC_Os01g74300.1	=	metallothionein, putative, expressed	chr01:43045910-43046982	LOWDATA	346.691	299.375	-0.211697	0	1	1	no	OK	202.009	131.765	-0.616449	1.10358	0.269777	0.600672	no	LOWDATA	520.608	506.201	-0.0404873	0	1	1	no	LOWDATA	253.418	344.733	0.443959	0	1	1	no
13101.m08127	LOC_Os01g74360.1	=	26S proteasome non-ATPase regulatory subunit 6, putative, expressed	chr01:43076297-43079356	LOWDATA	0.524012	2.48316	2.24451	0	1	1	no	NOTEST	0.632247	1.785	1.49736	-0.993105	0.320659	1	no	LOWDATA	0.367554	1.92728	2.39054	0	1	1	no	NOTEST	0.182782	0.977743	2.41933	-0.873883	0.382182	1	no
13101.m00046	LOC_Os01g01330.1	=	retrotransposon protein, putative, Ty1-copia subclass, expressed	chr01:144576-169512	LOWDATA	0.938755	0.761236	-0.302403	0	1	1	no	NOTEST	0.463549	0.972102	1.06839	-0.685994	0.492717	1	no	LOWDATA	0.13577	0.343793	1.34037	0	1	1	no	LOWDATA	0.188354	0.226429	0.265607	0	1	1	no
13101.m00051	LOC_Os01g01369.1	=	3-beta-hydroxysteroid-Delta-isomerase, putative, expressed	chr01:185151-208606	LOWDATA	1.29499	2.60266	1.00705	0	1	1	no	LOWDATA	2.8771	0.814451	-1.82072	0	1	1	no	LOWDATA	0.761303	0.447074	-0.767955	0	1	1	no	LOWDATA	1.35689	0.917334	-0.564789	0	1	1	no
13101.m00082	LOC_Os01g01560.1	=	transposon protein, putative, unclassified, expressed	chr01:269144-293626	LOWDATA	0.166365	0.258666	0.636739	0	1	1	no	NOTEST	0.177871	0.0342472	-2.37677	0.671425	0.50195	1	no	LOWDATA	0.0788465	0.0897284	0.186518	0	1	1	no	LOWDATA	0.0425365	0.0833735	0.970886	0	1	1	no
13101.m00173	LOC_Os01g02334.1	=	expressed protein	chr01:719279-741001	LOWDATA	0.9353	0.979497	0.0666128	0	1	1	no	NOTEST	0.997739	0	0	0	1	1	no	LOWDATA	0.342774	0.672936	0.97321	0	1	1	no	LOWDATA	0.265323	0.399017	0.588703	0	1	1	no
13101.m00174	LOC_Os01g02350.1	=	receptor-like kinase ARK1AS, putative, expressed	chr01:741271-919394	LOWDATA	1.79607	4.15117	1.20868	0	1	1	no	NOTEST	0.583244	0.294156	-0.987519	0.365587	0.714673	1	no	LOWDATA	1.2985	4.41725	1.76631	0	1	1	no	LOWDATA	0.16892	2.17757	3.68831	0	1	1	no
13101.m00176	LOC_Os01g02370.1	=	receptor-like kinase ARK1AS, putative, expressed	chr01:741271-919394	LOWDATA	2.5239	0.624472	-2.01494	0	1	1	no	LOWDATA	1.49285	1.55287	0.0568698	0	1	1	no	LOWDATA	0.807609	0.693072	-0.220653	0	1	1	no	LOWDATA	0.65006	0.823196	0.340663	0	1	1	no
13101.m00183	LOC_Os01g02410.1	=	protein kinase domain containing protein	chr01:741271-919394	LOWDATA	0.0670603	0.0944963	0.494798	0	1	1	no	NOTEST	0.138842	0.146149	0.0739903	-0.0111662	0.991091	1	no	LOWDATA	0.0259695	0.124432	2.26047	0	1	1	no	LOWDATA	0.053944	0.076268	0.499614	0	1	1	no
13101.m00191	LOC_Os01g02490.1	=	expressed protein	chr01:741271-919394	LOWDATA	0.46771	0.517812	0.146814	0	1	1	no	NOTEST	0	0	0	0	1	1	no	LOWDATA	0.0981223	0.232554	1.24491	0	1	1	no	LOWDATA	0.0344131	0.0895941	1.38045	0	1	1	no
13101.m14981	LOC_Os01g02490.2	=	expressed protein	chr01:741271-919394	LOWDATA	0.220619	0.696265	1.65808	0	1	1	no	LOWDATA	0.151868	0.0947839	-0.680106	0	1	1	no	LOWDATA	0.203143	0.0728197	-1.4801	0	1	1	no	NOTEST	0.257039	0.140246	-0.874026	0.129615	0.896871	1	no
13101.m00197	LOC_Os01g02550.1	=	protein kinase domain containing protein, expressed	chr01:741271-919394	LOWDATA	0.600687	0.331053	-0.859551	0	1	1	no	NOTEST	1.21565	0.574127	-1.08229	0.553286	0.580067	1	no	LOWDATA	0.402775	0.365985	-0.138191	0	1	1	no	LOWDATA	0.750378	0.398155	-0.914287	0	1	1	no
13101.m00199	LOC_Os01g02570.1	=	protein kinase domain containing protein, expressed	chr01:741271-919394	LOWDATA	7.6709	0.947324	-3.01746	0	1	1	no	LOWDATA	1.84644	0.476422	-1.95444	0	1	1	no	LOWDATA	2.7241	1.45091	-0.908819	0	1	1	no	LOWDATA	0.774083	0.412653	-0.907561	0	1	1	no
13101.m00200	LOC_Os01g02580.1	=	protein kinase domain containing protein	chr01:741271-919394	LOWDATA	2.97586	1.25723	-1.24306	0	1	1	no	NOTEST	2.01961	1.28816	-0.648765	0.483089	0.629032	1	no	LOWDATA	1.61583	1.03321	-0.645133	0	1	1	no	LOWDATA	1.21619	1.12126	-0.117247	0	1	1	no
13101.m00203	LOC_Os01g02610.1	=	protein kinase domain containing protein	chr01:741271-919394	LOWDATA	0.365659	0.50291	0.459801	0	1	1	no	NOTEST	0.127625	0.0431719	-1.56374	0.224448	0.822408	1	no	LOWDATA	0.0599536	0.2682	2.16139	0	1	1	no	NOTEST	0	0	0	0	1	1	no
13101.m00208	LOC_Os01g02680.1	=	protein kinase domain containing protein, expressed	chr01:741271-919394	LOWDATA	0.0850201	0.122999	0.532766	0	1	1	no	NOTEST	0.195002	0.307991	0.659397	-0.247991	0.804141	1	no	LOWDATA	0.0241445	0.141589	2.55194	0	1	1	no	LOWDATA	0.147952	0.215742	0.544182	0	1	1	no
13101.m00220	LOC_Os01g02800.1	=	receptor-like kinase ARK1AS, putative, expressed	chr01:934573-1018545	LOWDATA	0.536822	1.72422	1.68343	0	1	1	no	LOWDATA	2.93699	2.0825	-0.49602	0	1	1	no	OK	0.331732	2.27003	2.77462	-3.5352	0.000407461	0.0153253	yes	LOWDATA	1.73822	1.98193	0.189296	0	1	1	no
13101.m00249	LOC_Os01g03020.2	=	tRNA synthetase class I, putative, expressed	chr01:1144827-1157601	LOWDATA	0.0849708	0.0959025	0.174601	0	1	1	no	NOTEST	0.751913	0	-1e+300	-1e+300	0.012378	1	no	LOWDATA	0.0474767	0.0445943	-0.0903605	0	1	1	no	LOWDATA	0.12532	0.314393	1.32695	0	1	1	no
13101.m00282	LOC_Os01g03310.1	=	BBTI1 - Bowman-Birk type bran trypsin inhibitor precursor, expressed	chr01:1337228-1499609	LOWDATA	16.9143	12.0694	-0.486885	0	1	1	no	LOWDATA	23.2324	7.14469	-1.7012	0	1	1	no	LOWDATA	30.3539	35.4341	0.223256	0	1	1	no	OK	16.4821	14.8533	-0.15012	0.041959	0.966531	1	no
13101.m00283	LOC_Os01g03320.1	=	BBTI2 - Bowman-Birk type bran trypsin inhibitor precursor, expressed	chr01:1337228-1499609	LOWDATA	11.4218	13.312	0.220939	0	1	1	no	LOWDATA	14.2548	20.1621	0.500198	0	1	1	no	LOWDATA	14.3459	19.282	0.426623	0	1	1	no	OK	5.58003	13.4565	1.26996	-1.11143	0.266384	0.93904	no
13101.m00287	LOC_Os01g03360.1	=	BBTI5 - Bowman-Birk type bran trypsin inhibitor precursor, expressed	chr01:1337228-1499609	LOWDATA	3.46	5.98705	0.791075	0	1	1	no	NOTEST	0	0	0	0	1	1	no	OK	0	0	0	0	1	1	no	OK	0	0	0	0	1	1	no
13101.m00289	LOC_Os01g03380.1	=	BBTI6 - Bowman-Birk type bran trypsin inhibitor precursor, putative, expressed	chr01:1337228-1499609	LOWDATA	0.0403487	2.06805	5.67961	0	1	1	no	LOWDATA	0.35193	3.36454	3.25705	0	1	1	no	LOWDATA	0.028651	1.42609	5.63733	0	1	1	no	OK	0.696316	5.97778	3.1018	-3.66146	0.000250781	0.00937839	yes
13101.m00290	LOC_Os01g03390.1	=	BBTI7 - Bowman-Birk type bran trypsin inhibitor precursor, expressed	chr01:1337228-1499609	LOWDATA	9.52174	49.6788	2.38333	0	1	1	no	LOWDATA	10.7839	16.7768	0.637587	0	1	1	no	LOWDATA	24.4703	88.8285	1.85999	0	1	1	no	OK	9.56979	48.3541	2.33708	-3.89998	9.62023e-05	0.00449304	yes
13101.m00313	LOC_Os01g03640.1	=	multicopper oxidase domain containing protein, expressed	chr01:1337228-1499609	LOWDATA	2.1017	0.295434	-2.83065	0	1	1	no	LOWDATA	0.136767	0.119125	-0.199244	0	1	1	no	LOWDATA	1.82716	0.412102	-2.14852	0	1	1	no	NOTEST	0.369814	0.262657	-0.49362	0.0766903	0.93887	1	no
13101.m00351	LOC_Os01g03980.1	=	expressed protein	chr01:1710838-1727988	LOWDATA	13.6934	6.7469	-1.02119	0	1	1	no	OK	9.19809	6.61591	-0.475394	0.674788	0.49981	0.778281	no	OK	4.68195	6.02736	0.364416	-0.497625	0.618748	1	no	OK	9.21938	5.77962	-0.673696	0.891178	0.372834	1	no
13101.m00419	LOC_Os01g04600.1	=	expressed protein	chr01:2042319-2065150	LOWDATA	0.470662	1.12933	1.2627	0	1	1	no	NOTEST	0	0	0	0	1	1	no	NOTEST	1.51242	0	-1e+300	-1e+300	0.268273	1	no	NOTEST	2.50812	0	0	0	1	1	no
13101.m00516	LOC_Os01g05440.1	=	XH domain containing protein, expressed	chr01:2545792-2582575	LOWDATA	0.163995	0.258464	0.656308	0	1	1	no	NOTEST	0.101604	0.0362062	-1.48865	0.194864	0.845499	1	no	LOWDATA	0.052075	0.0846613	0.70111	0	1	1	no	NOTEST	0.123707	0.144722	0.226362	-0.0584529	0.953388	1	no
13101.m00538	LOC_Os01g05585.1	=	metallothionein, putative, expressed	chr01:2664336-2694087	LOWDATA	31.2151	116.143	1.89559	0	1	1	no	LOWDATA	14.012	184.975	3.72259	0	1	1	no	LOWDATA	410.296	190.519	-1.10673	0	1	1	no	LOWDATA	11.1487	140.638	3.65703	0	1	1	no
13101.m00544	LOC_Os01g05640.1	=	receptor-like protein kinase 5 precursor, putative, expressed	chr01:2664336-2694087	LOWDATA	0.660428	1.09193	0.725411	0	1	1	no	LOWDATA	0.419336	0.285098	-0.556652	0	1	1	no	LOWDATA	0.210183	0.506436	1.26873	0	1	1	no	NOTEST	0.211581	0.236403	0.160038	-0.0501809	0.959978	1	no
13101.m00545	LOC_Os01g05650.1	=	metallothionein, putative, expressed	chr01:2664336-2694087	LOWDATA	88.4	133.887	0.598899	0	1	1	no	LOWDATA	104.918	47.8518	-1.13261	0	1	1	no	LOWDATA	226.18	440.606	0.962019	0	1	1	no	LOWDATA	128.106	207.999	0.699234	0	1	1	no
13101.m00549	LOC_Os01g05670.1	=	3-oxo-5-alpha-steroid 4-dehydrogenase, putative, expressed	chr01:2706497-2724199	LOWDATA	35.7515	30.1425	-0.246202	0	1	1	no	OK	58.2124	37.3594	-0.639854	1.39074	0.164304	0.476228	no	OK	40.4051	32.7386	-0.303546	0.608879	0.542605	0.999743	no	LOWDATA	59.9307	44.1782	-0.439962	0	1	1	no
13101.m00614	LOC_Os01g06270.2	=	expressed protein	chr01:2961236-2988308	LOWDATA	1.09839	1.75768	0.678278	0	1	1	no	NOTEST	0.980355	0	0	0	1	1	no	LOWDATA	0.716906	2.00691	1.48512	0	1	1	no	LOWDATA	2.3629	1.1241	-1.07178	0	1	1	no
13101.m14930	LOC_Os01g06290.2	=	splicing factor, arginine/serine-rich, putative, expressed	chr01:2961236-2988308	LOWDATA	7.11065	7.54601	0.0857327	0	1	1	no	LOWDATA	6.62927	7.60544	0.19818	0	1	1	no	LOWDATA	7.60646	1.40655	-2.43506	0	1	1	no	OK	12.9681	0.99968	-3.69736	0.657751	0.510698	1	no
13101.m00617	LOC_Os01g06290.1	=	splicing factor, arginine/serine-rich, putative, expressed	chr01:2961236-2988308	LOWDATA	3.45969	2.87375	-0.267708	0	1	1	no	LOWDATA	5.22261	4.51546	-0.209898	0	1	1	no	LOWDATA	2.46113	9.25516	1.91093	0	1	1	no	OK	3.26267	12.9774	1.99187	-1.01637	0.309455	0.986235	no
13101.m00914	LOC_Os01g08700.4	=	GIGANTEA, putative, expressed	chr01:4325577-4337583	LOWDATA	1.77203	0.364228	-2.28249	0	1	1	no	NOTEST	2.45318	3.29797	0.426927	-0.106535	0.915158	1	no	NOTEST	0.396827	1.4525	1.87196	-0.10318	0.91782	1	no	OK	4.51687	1.35325	-1.73889	0.237896	0.811962	1	no
13101.m00921	LOC_Os01g08710.2	=	OsWRKY79 - Superfamily of TFs having WRKY and zinc finger domains, expressed	chr01:4339848-4355470	LOWDATA	4.43012	2.67631	-0.727101	0	1	1	no	NOTEST	1.9542	2.61439	0.419899	-0.638862	0.522913	1	no	OK	2.32443	1.52191	-0.610994	0.748484	0.454168	0.961523	no	NOTEST	2.57988	3.05786	0.24522	-0.338511	0.734978	1	no
13101.m01090	LOC_Os01g10150.1	=	CK1_CaseinKinase_1a.1 - CK1 includes the casein kinase 1 kinases, expressed	chr01:5327817-5490095	LOWDATA	11.6208	12.7627	0.135233	0	1	1	no	LOWDATA	5.00127	8.75374	0.807605	0	1	1	no	LOWDATA	12.4736	15.4868	0.312159	0	1	1	no	FAIL	12.5938	16.603	0	0	1	1	no
13101.m01102	LOC_Os01g10250.2	=	hydrolase, alpha/beta fold family domain containing protein, expressed	chr01:5327817-5490095	LOWDATA	2.95788	6.95023	1.23249	0	1	1	no	LOWDATA	2.41205	1.59405	-0.597562	0	1	1	no	LOWDATA	0.78496	1.45477	0.890105	0	1	1	no	FAIL	2.56013	1.91766	0	0	1	1	no
13101.m01103	LOC_Os01g10250.3	=	hydrolase, alpha/beta fold family domain containing protein, expressed	chr01:5327817-5490095	LOWDATA	3.57886	2.75562	-0.377122	0	1	1	no	LOWDATA	1.82001	3.50468	0.945341	0	1	1	no	LOWDATA	0.704774	4.65834	2.72458	0	1	1	no	FAIL	1.48577	4.41845	0	0	1	1	no
13101.m01101	LOC_Os01g10250.1	=	hydrolase, alpha/beta fold family domain containing protein, expressed	chr01:5327817-5490095	LOWDATA	5.211	14.3474	1.46115	0	1	1	no	LOWDATA	7.0615	8.56644	0.278722	0	1	1	no	LOWDATA	10.8544	22.2769	1.03726	0	1	1	no	FAIL	11.6649	31.2408	0	0	1	1	no
13101.m01110	LOC_Os01g10290.1	=	autophagy-related protein 3, putative, expressed	chr01:5327817-5490095	LOWDATA	9.25372	18.5068	0.99995	0	1	1	no	LOWDATA	3.86576	5.62788	0.54184	0	1	1	no	LOWDATA	10.5806	11.462	0.115442	0	1	1	no	FAIL	12.238	15.5466	0	0	1	1	no
13101.m01114	LOC_Os01g10340.1	=	expressed protein	chr01:5327817-5490095	LOWDATA	11.4121	7.29054	-0.646468	0	1	1	no	LOWDATA	8.33818	5.1161	-0.704687	0	1	1	no	LOWDATA	8.36231	6.65284	-0.329933	0	1	1	no	FAIL	14.8218	8.95683	0	0	1	1	no
13101.m01138	LOC_Os01g10520.1	=	expressed protein	chr01:5577711-5598234	LOWDATA	0.835291	0.726831	-0.200659	0	1	1	no	LOWDATA	0.500274	0.325994	-0.617874	0	1	1	no	LOWDATA	0.271499	0.52758	0.958446	0	1	1	no	LOWDATA	0.376588	0.546523	0.537295	0	1	1	no
13101.m01179	LOC_Os01g10920.1	=	peptide-N4-asparagine amidase A, putative	chr01:5822868-5876837	LOWDATA	0.337147	0.664403	0.978679	0	1	1	no	NOTEST	0.652078	0.0605499	-3.42885	1.71495	0.0863551	1	no	LOWDATA	0.45846	0.573854	0.323889	0	1	1	no	LOWDATA	0.361329	0.805278	1.15618	0	1	1	no
13101.m01180	LOC_Os01g10930.1	=	peptide-N4-asparagine amidase A, putative, expressed	chr01:5822868-5876837	LOWDATA	0.425259	0.163476	-1.37926	0	1	1	no	NOTEST	1.99309	0.839003	-1.24826	0.593494	0.552851	1	no	OK	1.94792	0.485104	-2.00557	0.524298	0.600071	1	no	NOTEST	1.81817	1.07154	-0.762794	0.312015	0.755029	1	no
13101.m01209	LOC_Os01g11220.1	=	hydrolase, acting on carbon-nitrogen, putative, expressed	chr01:5999332-6008272	LOWDATA	0.1814	0.217579	0.262359	0	1	1	no	NOTEST	0	0	0	0	1	1	no	NOTEST	0	0	0	0	1	1	no	NOTEST	0	0	0	0	1	1	no
13101.m01347	LOC_Os01g12480.1	=	expressed protein	chr01:6835904-6957758	LOWDATA	1.97832	5.15093	1.38056	0	1	1	no	LOWDATA	2.83757	4.12657	0.540286	0	1	1	no	LOWDATA	1.21768	2.42824	0.995779	0	1	1	no	LOWDATA	6.11112	3.69365	-0.726389	0	1	1	no
13101.m01351	LOC_Os01g12520.1	=	mitochondrial carrier protein, putative, expressed	chr01:6835904-6957758	LOWDATA	0.836899	7.57515	3.17815	0	1	1	no	LOWDATA	1.47024	4.55528	1.63149	0	1	1	no	LOWDATA	0.577275	8.85099	3.93851	0	1	1	no	LOWDATA	1.19565	9.43907	2.98085	0	1	1	no
13101.m01361	LOC_Os01g12560.1	=	3-methyl-2-oxobutanoate hydroxymethyltransferase, putative, expressed	chr01:6835904-6957758	LOWDATA	4.55636	4.07664	-0.160501	0	1	1	no	LOWDATA	8.33372	5.64927	-0.560895	0	1	1	no	LOWDATA	5.69152	3.3025	-0.785254	0	1	1	no	LOWDATA	5.99047	4.25476	-0.493592	0	1	1	no
13101.m01368	LOC_Os01g12640.2	=	expressed protein	chr01:6835904-6957758	LOWDATA	2.84071	4.03286	0.505552	0	1	1	no	LOWDATA	3.17621	5.8446	0.879799	0	1	1	no	LOWDATA	3.0907	4.0119	0.376353	0	1	1	no	OK	3.58388	2.75052	-0.381819	0.150726	0.880192	1	no
13101.m01369	LOC_Os01g12640.1	=	expressed protein	chr01:6835904-6957758	LOWDATA	2.99694	0.553502	-2.43683	0	1	1	no	LOWDATA	7.77587	3.57068	-1.1228	0	1	1	no	LOWDATA	3.55836	3.13133	-0.184435	0	1	1	no	LOWDATA	12.1025	6.00924	-1.01005	0	1	1	no
13101.m01534	LOC_Os01g13940.1	=	expressed protein	chr01:7805572-7809972	LOWDATA	3.03956	2.85826	-0.0887221	0	1	1	no	NOTEST	3.14731	1.25494	-1.3265	2.12895	0.0332584	1	no	OK	2.76406	3.24947	0.233415	-0.326722	0.743878	1	no	OK	4.01686	2.92027	-0.459966	0.695303	0.486865	1	no
13101.m01554	LOC_Os01g14100.1	=	BT1 family protein, putative, expressed	chr01:7861000-7899893	LOWDATA	0.918506	0.651772	-0.494923	0	1	1	no	NOTEST	0	0	0	0	1	1	no	LOWDATA	1.91654	6.25579	1.70669	0	1	1	no	OK	0	0	0	0	1	1	no
13101.m01553	LOC_Os01g14100.2	=	BT1 family protein, putative, expressed	chr01:7861000-7899893	LOWDATA	4.63472	8.54027	0.8818	0	1	1	no	NOTEST	0	0	0	0	1	1	no	LOWDATA	0.794672	2.0299	1.35298	0	1	1	no	NOTEST	0	0	0	0	1	1	no
13101.m01558	LOC_Os01g14140.1	=	X8 domain containing protein, expressed	chr01:7927082-7928764	LOWDATA	14.2139	7.33102	-0.955216	0	1	1	no	OK	11.337	5.83095	-0.959238	1.56019	0.118715	0.409723	no	OK	18.2511	4.94435	-1.88413	2.9188	0.00351381	0.0689529	no	OK	10.6763	4.88315	-1.12853	1.59691	0.110285	0.65339	no
13101.m01801	LOC_Os01g16170.2	=	PQ loop repeat domain containing protein, expressed	chr01:9132518-9139533	LOWDATA	0.946313	1.37055	0.534361	0	1	1	no	NOTEST	0	0	0	0	1	1	no	OK	0	2.66145	1e+300	1e+300	0.00657423	0.104068	no	NOTEST	2.06777	0	-1e+300	-1e+300	0.00227808	1	no
13101.m01864	LOC_Os01g16660.1	=	transposon protein, putative, unclassified	chr01:9446097-9449933	LOWDATA	0.0593799	0.0789909	0.411712	0	1	1	no	NOTEST	0.146152	0.0292218	-2.32235	1.56611	0.117322	1	no	NOTEST	0.0275596	0.0120289	-1.19604	0.135168	0.892479	1	no	NOTEST	0.0257849	0	-1e+300	-1e+300	0.100574	1	no
13101.m01897	LOC_Os01g16930.1	=	presenilin, putative, expressed	chr01:9664384-9688558	LOWDATA	1.25291	2.31151	0.883554	0	1	1	no	LOWDATA	1.89086	0.539852	-1.8084	0	1	1	no	OK	3.65149	4.58469	0.328341	-0.0636473	0.949251	1	no	LOWDATA	2.16924	2.20074	0.0208046	0	1	1	no
13101.m01900	LOC_Os01g16960.1	=	pyruvate kinase, putative, expressed	chr01:9693002-9698793	LOWDATA	10.606	16.1366	0.605459	0	1	1	no	LOWDATA	8.93135	6.28287	-0.507453	0	1	1	no	OK	6.99869	14.3244	1.03331	-1.57481	0.115299	0.57561	no	OK	9.04662	14.1768	0.648081	-1.14324	0.252939	0.921107	no
13101.m01913	LOC_Os01g17060.1	=	expressed protein	chr01:9792916-9799176	LOWDATA	0.138439	0.19641	0.504619	0	1	1	no	NOTEST	0.217323	0.143827	-0.595506	0.681018	0.49586	1	no	NOTEST	0.0753826	0.0462827	-0.703759	0.615636	0.538135	1	no	NOTEST	0.0764392	0.0888661	0.217321	-0.194851	0.845509	1	no
13101.m02108	LOC_Os01g19390.1	=	glycerol-3-phosphate acyltransferase, putative	chr01:10968190-10972176	LOWDATA	1.87806	2.76895	0.560094	0	1	1	no	NOTEST	2.18487	0.805962	-1.43876	2.14599	0.0318737	1	no	NOTEST	0.876987	1.89642	1.11265	-1.36725	0.171546	1	no	NOTEST	1.45718	1.46947	0.0121228	-0.016569	0.98678	1	no
13101.m02185	LOC_Os01g20120.1	=	expressed protein	chr01:11425311-11429972	LOWDATA	5.22099	6.29867	0.270725	0	1	1	no	OK	7.05868	2.58596	-1.4487	2.32635	0.0199999	0.153752	no	OK	4.90148	5.00019	0.0287654	-0.0352362	0.971891	1	no	OK	4.91234	5.70128	0.214874	-0.285402	0.775336	1	no
13101.m02261	LOC_Os01g21250.1	=	late embryogenesis abundant protein, putative	chr01:11862465-11863472	LOWDATA	98.5268	397.79	2.01342	0	1	1	no	LOWDATA	158.417	115.341	-0.457824	0	1	1	no	OK	81.6747	518.279	2.66577	-5.99137	2.08086e-09	6.98232e-07	yes	LOWDATA	83.3612	277.17	1.73333	0	1	1	no
13101.m02327	LOC_Os01g21890.1	=	expressed protein	chr01:12257111-12290554	LOWDATA	0.762468	0.289948	-1.39488	0	1	1	no	NOTEST	0	0.0276926	1e+300	1e+300	0.207358	1	no	LOWDATA	0.190755	0.263669	0.467007	0	1	1	no	NOTEST	0	0	0	0	1	1	no
13101.m02340	LOC_Os01g22010.2	=	S-adenosylmethionine synthetase, putative, expressed	chr01:12362682-12365288	LOWDATA	3.06171	4.26948	0.479722	0	1	1	no	LOWDATA	3.92265	1.01961	-1.94381	0	1	1	no	LOWDATA	1.07293	0.87302	-0.297463	0	1	1	no	LOWDATA	0.42023	0.260494	-0.689929	0	1	1	no
13101.m02375	LOC_Os01g22390.2	=	WD domain containing protein, putative, expressed	chr01:12498868-12639649	LOWDATA	0.996163	0.693203	-0.523103	0	1	1	no	LOWDATA	1.77162	0.768739	-1.2045	0	1	1	no	NOTEST	0	0	0	0	1	1	no	NOTEST	1.33884	0	0	0	1	1	no
13101.m02376	LOC_Os01g22390.3	=	WD domain containing protein, putative, expressed	chr01:12498868-12639649	LOWDATA	0.9673	1.51599	0.648229	0	1	1	no	LOWDATA	0.230404	0.273279	0.246211	0	1	1	no	NOTEST	0.858339	1.1419	0.411814	-0.103477	0.917585	1	no	LOWDATA	0.222125	1.4457	2.70233	0	1	1	no
13101.m02377	LOC_Os01g22400.1	=	OsFBDUF2 - F-box and DUF domain containing protein, expressed	chr01:12498868-12639649	LOWDATA	1.77489	0.416243	-2.09223	0	1	1	no	NOTEST	0.151533	0	0	0	1	1	no	LOWDATA	0.591322	0.593416	0.00509872	0	1	1	no	NOTEST	0	0	0	0	1	1	no
13101.m02384	LOC_Os01g22480.2	=	OsFBDUF4 - F-box and DUF domain containing protein, expressed	chr01:12498868-12639649	LOWDATA	0.406383	0.938203	1.20706	0	1	1	no	LOWDATA	0.615385	0.253954	-1.27692	0	1	1	no	NOTEST	0.272941	0.473449	0.794617	-0.103404	0.917642	1	no	LOWDATA	0.365663	0.475825	0.379915	0	1	1	no
13101.m02508	LOC_Os01g23680.3	=	rossmann fold nucleotide-binding protein involved in DNA uptake, putative, expressed	chr01:13285076-13322921	LOWDATA	3.36403	2.58576	-0.379601	0	1	1	no	LOWDATA	1.65474	0.840399	-0.977455	0	1	1	no	LOWDATA	2.39784	1.84716	-0.37642	0	1	1	no	LOWDATA	1.15065	1.01438	-0.181856	0	1	1	no
13101.m02530	LOC_Os01g23910.1	=	hypothetical protein	chr01:13451998-13456928	LOWDATA	1.52316	2.22589	0.547315	0	1	1	no	NOTEST	0.514771	0	0	0	1	1	no	LOWDATA	0.735714	0.62141	-0.243598	0	1	1	no	NOTEST	0.424626	0	0	0	1	1	no
13101.m02741	LOC_Os01g25920.1	=	expressed protein	chr01:14701278-14705002	LOWDATA	0.0640117	3.27608	5.67749	0	1	1	no	NOTEST	0	0	0	0	1	1	no	NOTEST	0.0895473	1.31045	3.87127	-4.09896	4.15014e-05	1	no	NOTEST	0	0	0	0	1	1	no
13101.m02802	LOC_Os01g26970.4	=	expressed protein	chr01:15018779-15022941	LOWDATA	0.345864	0.33226	-0.0578901	0	1	1	no	LOWDATA	0.49174	0.489793	-0.00572632	0	1	1	no	LOWDATA	0.2617	0.246139	-0.0884411	0	1	1	no	LOWDATA	0.117103	0.256541	1.13142	0	1	1	no
13101.m02826	LOC_Os01g27170.1	=	potassium transporter, putative, expressed	chr01:15129830-15156219	LOWDATA	0.0281058	0.0759784	1.43472	0	1	1	no	NOTEST	0.0251511	0.14419	2.51928	-1.96607	0.0492904	1	no	NOTEST	0.0718889	0.0728283	0.0187298	-0.00345231	0.997245	1	no	NOTEST	0.0350004	0.0665814	0.927749	-0.163941	0.869778	1	no
13101.m14940	LOC_Os01g27940.2	=	cyclin-L1-1, putative, expressed	chr01:15617194-15623540	LOWDATA	0.540127	0.69018	0.353673	0	1	1	no	NOTEST	1.32022	0.109079	-3.59734	0.764335	0.444668	1	no	LOWDATA	0.229876	0.359869	0.646618	0	1	1	no	LOWDATA	0.394437	0.665308	0.754229	0	1	1	no
13101.m02988	LOC_Os01g28710.1	=	conserved hypothetical protein	chr01:16078266-16087808	LOWDATA	2.1625	1.04436	-1.05008	0	1	1	no	NOTEST	0.418058	0.147976	-1.49834	0.472685	0.636438	1	no	NOTEST	1.06019	0.137249	-2.94946	1.30249	0.192749	1	no	NOTEST	0	0	0	0	1	1	no
13101.m02993	LOC_Os01g28744.1	=	retrotransposon protein, putative, unclassified	chr01:16100876-16106040	LOWDATA	0.941854	1.45312	0.625576	0	1	1	no	OK	5.48672	4.78851	-0.196365	0.258043	0.796374	0.941631	no	NOTEST	0.550168	0.54769	-0.00651258	0.00701736	0.994401	1	no	OK	3.32185	0.958159	-1.79365	2.28536	0.022292	0.250589	no
13101.m03174	LOC_Os01g31580.1	=	BZIP protein, putative, expressed	chr01:17259319-17349770	LOWDATA	7.7882	8.37047	0.10402	0	1	1	no	LOWDATA	7.61165	5.50082	-0.468562	0	1	1	no	LOWDATA	2.87407	5.91723	1.04183	0	1	1	no	OK	5.77099	8.28324	0.521377	-0.155008	0.876815	1	no
13101.m03179	LOC_Os01g31629.2	=	expressed protein	chr01:17259319-17349770	LOWDATA	3.05397	5.15698	0.755842	0	1	1	no	LOWDATA	10.1622	7.85926	-0.37075	0	1	1	no	OK	5.71393	3.66117	-0.642178	0.423089	0.67223	1	no	LOWDATA	12.7759	0.878904	-3.86157	0	1	1	no
13101.m03180	LOC_Os01g31629.3	=	expressed protein	chr01:17259319-17349770	LOWDATA	11.458	6.83214	-0.745943	0	1	1	no	LOWDATA	4.12635	2.27294	-0.860303	0	1	1	no	LOWDATA	4.9461	6.75165	0.448947	0	1	1	no	LOWDATA	4.22761	16.018	1.92178	0	1	1	no
13101.m03199	LOC_Os01g31810.1	=	RNA recognition motif containing protein, putative, expressed	chr01:17421692-17428347	LOWDATA	0.64502	0.851786	0.401147	0	1	1	no	NOTEST	3.14791	0.474643	-2.72948	3.50989	0.000448292	1	no	NOTEST	0	0	0	0	1	1	no	NOTEST	0.510221	0	0	0	1	1	no
13101.m03498	LOC_Os01g34660.1	=	RNAse P Rpr2/Rpp21 subunit domain containing protein, expressed	chr01:19109814-19121364	LOWDATA	0.212311	0.17248	-0.299748	0	1	1	no	LOWDATA	1.15813	1.00461	-0.205156	0	1	1	no	NOTEST	0	0	0	0	1	1	no	NOTEST	1.53373	2.51462	0.713293	-0.045565	0.963657	1	no
13101.m03717	LOC_Os01g36720.1	=	transporter, major facilitator family, putative, expressed	chr01:20384967-20387472	LOWDATA	1.96057	0.678464	-1.53093	0	1	1	no	NOTEST	1.61283	0.534384	-1.59364	0.787537	0.430968	1	no	OK	3.84505	2.23632	-0.78188	0.72298	0.469692	0.968183	no	NOTEST	1.41642	0.558278	-1.34319	0.671733	0.501754	1	no
13101.m03745	LOC_Os01g36930.1	=	ubiquitin carboxyl-terminal hydrolase 6, putative, expressed	chr01:20580569-20588538	LOWDATA	24.8941	31.5398	0.341366	0	1	1	no	OK	22.315	12.901	-0.790534	1.41366	0.157463	0.467321	no	OK	19.6235	34.4135	0.810394	-1.47684	0.139718	0.633287	no	OK	25.5021	32.1867	0.335846	-0.715501	0.4743	1	no
13101.m03844	LOC_Os01g37800.1	=	ras-related protein, putative, expressed	chr01:21142347-21178921	LOWDATA	19.4106	46.3496	1.25571	0	1	1	no	LOWDATA	26.995	44.3264	0.715472	0	1	1	no	LOWDATA	27.2507	65.2865	1.26049	0	1	1	no	LOWDATA	47.8176	90.2697	0.9167	0	1	1	no
13101.m03846	LOC_Os01g37820.1	=	oxidoreductase/ transition metal ion binding protein, putative, expressed	chr01:21142347-21178921	LOWDATA	5.76818	4.67222	-0.304009	0	1	1	no	LOWDATA	10.3176	5.10546	-1.015	0	1	1	no	LOWDATA	4.42824	4.55224	0.0398423	0	1	1	no	OK	9.91246	7.20544	-0.460156	0.718139	0.472672	1	no
13101.m03929	LOC_Os01g38530.1	=	ELF3 protein, putative, expressed	chr01:21622529-21643927	LOWDATA	4.8119	6.33538	0.396824	0	1	1	no	LOWDATA	2.99532	2.32344	-0.366445	0	1	1	no	OK	1.91386	4.30376	1.16911	-0.900608	0.367797	0.909422	no	LOWDATA	2.75663	3.39363	0.299925	0	1	1	no
13101.m03941	LOC_Os01g38620.2	=	3-5 exonuclease/ nucleic acid binding protein, putative, expressed	chr01:21697736-21715795	LOWDATA	0.16247	0.10565	-0.620883	0	1	1	no	LOWDATA	0.250577	0.152677	-0.714771	0	1	1	no	LOWDATA	0.0745702	0.0644518	-0.210377	0	1	1	no	NOTEST	0	0	0	0	1	1	no
13101.m03987	LOC_Os01g39050.1	=	retrotransposon protein, putative, unclassified	chr01:21948894-21962359	LOWDATA	0.0790924	0.148419	0.908065	0	1	1	no	NOTEST	0.00857705	0.013365	0.63991	-0.332979	0.73915	1	no	LOWDATA	0.0341516	0.0586466	0.780094	0	1	1	no	NOTEST	0	0	0	0	1	1	no
13101.m04042	LOC_Os01g39600.2	=	expressed protein	chr01:22336300-22340500	LOWDATA	0.258848	0.225751	-0.197373	0	1	1	no	LOWDATA	0.438674	0.49646	0.178527	0	1	1	no	LOWDATA	0.192628	0.196719	0.0303208	0	1	1	no	NOTEST	0.513275	0.514608	0.00373992	-0.000554033	0.999558	1	no
13101.m04163	LOC_Os01g40640.3	=	S1 RNA binding domain containing protein, expressed	chr01:22978897-22997463	LOWDATA	1.31419	2.34986	0.838403	0	1	1	no	NOTEST	1.27672	1.19297	-0.09788	0.0376859	0.969938	1	no	LOWDATA	0.316521	0.226059	-0.4856	0	1	1	no	NOTEST	0.625131	0	0	0	1	1	no
13101.m04161	LOC_Os01g40640.1	=	S1 RNA binding domain containing protein, expressed	chr01:22978897-22997463	LOWDATA	1.90079	1.35469	-0.488638	0	1	1	no	NOTEST	3.25499	1.31784	-1.30448	0.590627	0.55477	1	no	NOTEST	0.711999	1.15291	0.695339	-0.175801	0.86045	1	no	NOTEST	1.57703	1.19012	-0.406099	0.151164	0.879846	1	no
13101.m04169	LOC_Os01g40690.1	=	holocarboxylase synthetase, putative, expressed	chr01:22978897-22997463	LOWDATA	6.94619	8.1498	0.230541	0	1	1	no	OK	8.75889	9.45022	0.1096	-0.0831301	0.933748	0.99445	no	OK	9.24175	6.63073	-0.478997	0.22851	0.81925	1	no	OK	5.59195	7.46063	0.415946	-0.138974	0.88947	1	no
13101.m04258	LOC_Os01g41530.1	=	OsFBL2 - F-box domain and LRR containing protein, expressed	chr01:23315097-23607468	LOWDATA	0.736153	0.775062	0.0743065	0	1	1	no	LOWDATA	0.524974	0.488371	-0.104268	0	1	1	no	LOWDATA	1.00586	0.698182	-0.526761	0	1	1	no	LOWDATA	0.774302	0.842952	0.122553	0	1	1	no
13101.m04262	LOC_Os01g41565.1	=	ATP-binding domain-containing protein, putative	chr01:23315097-23607468	LOWDATA	0.778759	4.76642	2.61366	0	1	1	no	LOWDATA	0.978503	0.161376	-2.60015	0	1	1	no	LOWDATA	4.00253	5.30162	0.405521	0	1	1	no	LOWDATA	0.79189	0.512777	-0.626969	0	1	1	no
13101.m04266	LOC_Os01g41610.1	=	mitochondrial ATP synthase g subunit family protein, putative, expressed	chr01:23315097-23607468	LOWDATA	19.2782	19.2213	-0.00426173	0	1	1	no	LOWDATA	21.884	17.2497	-0.343307	0	1	1	no	LOWDATA	16.8452	24.0311	0.512568	0	1	1	no	LOWDATA	24.1561	24.3999	0.0144904	0	1	1	no
13101.m04268	LOC_Os01g41620.1	=	transposon protein, putative, unclassified	chr01:23315097-23607468	LOWDATA	0.0192198	0.0553764	1.52668	0	1	1	no	LOWDATA	0.05057	0.0104605	-2.27334	0	1	1	no	LOWDATA	0.00211607	0.0161375	2.93096	0	1	1	no	LOWDATA	0.00259791	0.0144081	2.47146	0	1	1	no
13101.m04273	LOC_Os01g41660.1	=	phosphoethanolamine/phosphocholine phosphatase, putative, expressed	chr01:23315097-23607468	LOWDATA	3.30156	2.47322	-0.416755	0	1	1	no	LOWDATA	3.26364	0.833784	-1.96874	0	1	1	no	LOWDATA	2.08765	2.5042	0.262469	0	1	1	no	LOWDATA	3.19976	3.75945	0.232555	0	1	1	no
13101.m04318	LOC_Os01g42050.1	=	DNL zinc finger domain containing protein, putative	chr01:23837667-23845837	LOWDATA	0.229931	0.331008	0.525668	0	1	1	no	NOTEST	0	0	0	0	1	1	no	NOTEST	0	0	0	0	1	1	no	NOTEST	0.690474	0	0	0	1	1	no
13101.m04367	LOC_Os01g42510.1	=	expressed protein	chr01:24167200-24170655	LOWDATA	0.698001	0.658275	-0.0845374	0	1	1	no	NOTEST	0.896772	0.843553	-0.0882619	0.0201371	0.983934	1	no	OK	3.5435	0.958559	-1.88624	0.389009	0.69727	1	no	NOTEST	0	1.40545	1e+300	1e+300	0.310481	1	no
13101.m04414	LOC_Os01g42870.1	=	transferase family protein, putative, expressed	chr01:24379572-24399986	LOWDATA	11.9185	19.2304	0.690187	0	1	1	no	OK	12.8984	18.2041	0.497077	-0.892615	0.372063	0.689332	no	OK	14.1106	18.5191	0.392237	-0.623673	0.532842	0.997427	no	OK	17.4695	21.5912	0.305607	-0.545759	0.585232	1	no
13101.m04425	LOC_Os01g42970.1	=	zinc finger C-x8-C-x5-C-x3-H type family protein, expressed	chr01:24470877-24496851	LOWDATA	0.393436	0.563545	0.518401	0	1	1	no	NOTEST	3.38356	2.97502	-0.185642	0.101279	0.919329	1	no	OK	3.29316	1.63993	-1.00584	0.338064	0.735315	1	no	OK	3.66904	1.91616	-0.937186	0.379922	0.704003	1	no
13101.m04437	LOC_Os01g43040.1	=	amino acid transporter, putative, expressed	chr01:24533782-24567749	LOWDATA	3.01935	2.6666	-0.179235	0	1	1	no	NOTEST	2.2223	2.22026	-0.00132882	0.00138767	0.998893	1	no	NOTEST	1.50697	1.95193	0.373258	-0.324707	0.745403	1	no	NOTEST	1.83781	2.52133	0.456202	-0.700221	0.48379	1	no
13101.m04477	LOC_Os01g43350.1	=	protein kinase family protein, putative, expressed	chr01:24783397-24787205	LOWDATA	1.9839	2.01964	0.0257589	0	1	1	no	NOTEST	2.59588	2.45064	-0.083066	0.081883	0.93474	1	no	NOTEST	1.38929	1.61389	0.216192	-0.295685	0.767471	1	no	NOTEST	1.76508	2.3948	0.440174	-0.658665	0.510111	1	no
13101.m04604	LOC_Os01g44430.1	=	retrotransposon protein, putative, unclassified	chr01:25475266-25481929	LOWDATA	0.034334	0.078262	1.18867	0	1	1	no	LOWDATA	0.103645	0.022485	-2.20462	0	1	1	no	NOTEST	0	0	0	0	1	1	no	NOTEST	0	0	0	0	1	1	no
13101.m04609	LOC_Os01g44980.1	=	peptide deformylase, putative, expressed	chr01:25512687-25588130	LOWDATA	2.67451	3.18727	0.253044	0	1	1	no	LOWDATA	7.61223	3.65004	-1.06041	0	1	1	no	LOWDATA	4.07756	1.9134	-1.09157	0	1	1	no	LOWDATA	4.07195	2.06911	-0.97671	0	1	1	no
13101.m04619	LOC_Os01g45070.1	=	peptide deformylase, putative, expressed	chr01:25512687-25588130	LOWDATA	5.02302	3.51433	-0.515304	0	1	1	no	LOWDATA	11.3446	7.04173	-0.688004	0	1	1	no	LOWDATA	7.37964	2.63877	-1.48368	0	1	1	no	LOWDATA	5.92103	4.02542	-0.55671	0	1	1	no
13101.m04646	LOC_Os01g45320.1	=	zinc finger family protein, putative	chr01:25691672-25749753	LOWDATA	0.0601716	0.0186536	-1.68963	0	1	1	no	LOWDATA	0.153074	0.0721259	-1.08564	0	1	1	no	LOWDATA	0.117482	0.0412446	-1.51016	0	1	1	no	LOWDATA	0.119799	0.0240251	-2.318	0	1	1	no
13101.m04647	LOC_Os01g45330.1	=	retrotransposon protein, putative, Ty3-gypsy subclass	chr01:25691672-25749753	LOWDATA	0.0192944	0.0125988	-0.614894	0	1	1	no	LOWDATA	0.0149517	0.00663981	-1.1711	0	1	1	no	NOTEST	0.00825466	0.00802118	-0.0413938	0.0025634	0.997955	1	no	NOTEST	0	0	0	0	1	1	no
13101.m04650	LOC_Os01g45360.1	=	membrane associated DUF588 domain containing protein, putative, expressed	chr01:25691672-25749753	LOWDATA	7.82786	10.66	0.445519	0	1	1	no	LOWDATA	12.6107	12.33	-0.0324739	0	1	1	no	LOWDATA	9.896	9.1551	-0.11227	0	1	1	no	LOWDATA	11.6323	11.2532	-0.0478098	0	1	1	no
13101.m04791	LOC_Os01g46600.1	=	seed maturation protein PM41, putative, expressed	chr01:26513456-26536147	LOWDATA	0.195056	24.5913	6.97812	0	1	1	no	LOWDATA	0.137626	30.6968	7.80119	0	1	1	no	LOWDATA	0.14809	5.86497	5.30758	0	1	1	no	OK	0	0	0	0	1	1	no
13101.m04803	LOC_Os01g46710.1	=	transposon protein, putative, CACTA, En/Spm sub-class, expressed	chr01:26600859-26607462	LOWDATA	10.0448	15.2245	0.599948	0	1	1	no	LOWDATA	9.15248	5.96626	-0.617335	0	1	1	no	OK	4.0861	10.0684	1.30104	-2.02246	0.0431288	0.333924	no	OK	7.92588	9.00156	0.183604	-0.329281	0.741943	1	no
13101.m04816	LOC_Os01g46820.1	=	hypothetical protein	chr01:26698058-26715214	LOWDATA	0.324781	0.134098	-1.27618	0	1	1	no	NOTEST	0.122808	0	0	0	1	1	no	NOTEST	0	0	0	0	1	1	no	NOTEST	0.0963277	0	-1e+300	-1e+300	0.0938481	1	no
13101.m04832	LOC_Os01g46950.1	=	aldose 1-epimerase, putative, expressed	chr01:26784089-26804464	LOWDATA	1.1549	1.24023	0.102834	0	1	1	no	LOWDATA	2.3798	1.86041	-0.355224	0	1	1	no	NOTEST	1.40562	0.896052	-0.64955	0.138464	0.889874	1	no	LOWDATA	2.14066	2.07902	-0.0421529	0	1	1	no
13101.m05002	LOC_Os01g48280.2	=	ubiquitin-conjugating enzyme, putative, expressed	chr01:27657705-27670647	LOWDATA	2.90554	2.44041	-0.25168	0	1	1	no	LOWDATA	2.67853	0.487571	-2.45776	0	1	1	no	LOWDATA	4.50155	1.78931	-1.33102	0	1	1	no	LOWDATA	2.66165	3.1905	0.26146	0	1	1	no
13101.m05054	LOC_Os01g48700.1	=	transcription factor Dp, putative, expressed	chr01:27923839-27927405	LOWDATA	5.57616	5.24357	-0.0887221	0	1	1	no	NOTEST	2.70201	2.55926	-0.0783051	0.120935	0.903743	1	no	LOWDATA	2.40849	3.24901	0.431873	0	1	1	no	OK	4.69914	3.19484	-0.556652	0.796836	0.425546	1	no
13101.m05131	LOC_Os01g49350.1	=	DUF292 domain containing protein, expressed	chr01:28369810-28373464	LOWDATA	14.1913	14.5267	0.0337021	0	1	1	no	OK	10.9344	8.28311	-0.400631	0.682846	0.494704	0.774815	no	OK	13.4702	8.53406	-0.658471	1.03344	0.301396	0.858906	no	OK	10.5122	11.0311	0.0695142	-0.111946	0.910866	1	no
13101.m05151	LOC_Os01g49529.2	=	OsWAK10d - OsWAK receptor-like cytoplasmic kinase OsWAK-RLCK, expressed	chr01:28478088-28495299	LOWDATA	5.01171	4.84669	-0.0483021	0	1	1	no	LOWDATA	9.34052	6.7501	-0.468593	0	1	1	no	LOWDATA	6.83226	7.93126	0.215188	0	1	1	no	LOWDATA	5.43455	7.75304	0.512601	0	1	1	no
13101.m05171	LOC_Os01g49710.1	=	glutathione S-transferase, putative, expressed	chr01:28564899-28586204	LOWDATA	4.98106	19.0989	1.93896	0	1	1	no	OK	3.09645	5.44747	0.814972	-1.29982	0.193662	0.515386	no	OK	3.81604	16.4141	2.10479	-2.98909	0.00279813	0.0599683	no	OK	3.04502	13.1379	2.10921	-3.29108	0.000998034	0.0259215	yes
13101.m05369	LOC_Os01g51450.1	=	NAP domain containing protein, putative	chr01:29579379-29582199	LOWDATA	0.815396	0	-1e+300	0	1	1	no	OK	3.44488	0	-1e+300	-1e+300	0.000750554	0.0162209	yes	NOTEST	0.392604	0	-1e+300	-1e+300	0.0167762	1	no	NOTEST	1.33563	0.606911	-1.13797	1.38944	0.164699	1	no
13101.m05387	LOC_Os01g51630.1	=	XIE, putative, expressed	chr01:29651534-29674671	LOWDATA	1.6921	1.69101	-0.000924248	0	1	1	no	LOWDATA	0.504125	0.581766	0.206658	0	1	1	no	OK	3.63115	4.79338	0.400617	-0.346875	0.728685	1	no	OK	2.75319	4.06112	0.560775	-0.441833	0.65861	1	no
13101.m05462	LOC_Os01g52230.1	=	phosphoethanolamine/phosphocholine phosphatase, putative, expressed	chr01:30024203-30040543	LOWDATA	0.449008	0.844165	0.910784	0	1	1	no	NOTEST	0.857006	0	0	0	1	1	no	LOWDATA	2.51465	1.37764	-0.868158	0	1	1	no	NOTEST	1.31325	0	0	0	1	1	no
13101.m05574	LOC_Os01g53210.1	=	metal transporter Nramp3, putative	chr01:30573785-30575243	LOWDATA	0.586087	1.87945	1.68113	0	1	1	no	NOTEST	0.0590436	0.828366	3.81042	-0.49863	0.61804	1	no	LOWDATA	1.37962	0.360492	-1.93624	0	1	1	no	NOTEST	0.0559341	0.124714	1.15682	-0.139333	0.889187	1	no
13101.m05737	LOC_Os01g54560.3	=	trehalose synthase, putative, expressed	chr01:31353241-31391191	LOWDATA	8.1724	10.0589	0.299647	0	1	1	no	OK	8.67199	3.42887	-1.33863	1.38673	0.165523	0.478021	no	LOWDATA	4.21479	7.05144	0.742458	0	1	1	no	OK	5.20649	8.36546	0.684133	-0.708616	0.478563	1	no
13101.m05772	LOC_Os01g54920.1	=	heat- and acid-stable phosphoprotein, putative, expressed	chr01:31584053-31588091	LOWDATA	28.0757	26.7177	-0.0715252	0	1	1	no	LOWDATA	20.3934	14.9087	-0.451952	0	1	1	no	OK	21.4075	37.6828	0.815788	-2.0849	0.0370788	0.306447	no	LOWDATA	43.3592	35.1274	-0.303742	0	1	1	no
13101.m05933	LOC_Os01g56150.1	=	OsProCP1 - Putative Lysosomal Pro-x Carboxypeptidase homologue, expressed	chr01:32333560-32349094	LOWDATA	5.92256	8.53704	0.527514	0	1	1	no	OK	7.16628	6.76701	-0.0827058	0.117645	0.906349	0.984426	no	OK	6.66227	7.33627	0.139031	-0.178504	0.858327	1	no	OK	6.59109	8.49461	0.36603	-0.490138	0.624037	1	no
13101.m05974	LOC_Os01g56460.1	=	mitochondrial glycoprotein, putative, expressed	chr01:32537854-32540577	LOWDATA	5.08308	4.05595	-0.325663	0	1	1	no	NOTEST	2.98782	2.78396	-0.101957	0.107813	0.914144	1	no	OK	4.46639	5.29216	0.244748	-0.303265	0.761688	1	no	OK	4.31225	4.91981	0.190162	-0.223696	0.822994	1	no
13101.m06043	LOC_Os01g56960.1	=	acid phosphatase, putative	chr01:32902823-32924596	LOWDATA	0.345315	0.258971	-0.415126	0	1	1	no	LOWDATA	0.284382	0.190709	-0.576461	0	1	1	no	LOWDATA	0.578916	0.265367	-1.12536	0	1	1	no	LOWDATA	0.478672	0.677236	0.500622	0	1	1	no
13101.m06070	LOC_Os01g57230.1	=	BTBN1 - Bric-a-Brac, Tramtrack, Broad Complex BTB domain with non-phototropic hypocotyl 3 NPH3 and coiled-coil domains, expressed	chr01:33058142-33066790	LOWDATA	0.116862	0.815631	2.80311	0	1	1	no	LOWDATA	0.300695	0.375813	0.321716	0	1	1	no	LOWDATA	0.292732	0.431565	0.559997	0	1	1	no	LOWDATA	0.17444	0.469784	1.42927	0	1	1	no
13101.m06211	LOC_Os01g58500.1	=	expressed protein	chr01:33811706-33827853	LOWDATA	0.484616	0.518729	0.09814	0	1	1	no	LOWDATA	0.129624	0.144732	0.15906	0	1	1	no	NOTEST	0.365065	0.493848	0.435916	-0.0737923	0.941176	1	no	NOTEST	0.0773024	0.55839	2.85269	-0.528918	0.596863	1	no
13101.m06300	LOC_Os01g59300.1	=	hypothetical protein	chr01:34276117-34312388	LOWDATA	0.137842	0.170928	0.310374	0	1	1	no	NOTEST	0	0	0	0	1	1	no	NOTEST	0	0	0	0	1	1	no	NOTEST	0	0	0	0	1	1	no
13101.m06334	LOC_Os01g59580.1	=	retrotransposon protein, putative, unclassified	chr01:34444699-34474585	LOWDATA	0.682987	0.0845369	-3.01421	0	1	1	no	NOTEST	0.273134	0	0	0	1	1	no	LOWDATA	0.312433	0.05611	-2.47721	0	1	1	no	NOTEST	0	0	0	0	1	1	no
13101.m06353	LOC_Os01g59750.1	=	histidine triad family protein, putative, expressed	chr01:34559588-34567607	LOWDATA	1.10031	0.594896	-0.887205	0	1	1	no	NOTEST	0.505511	0.227455	-1.15217	1.14892	0.250588	1	no	LOWDATA	0.294109	0.164829	-0.83538	0	1	1	no	NOTEST	0	0.11206	1e+300	1e+300	0.109452	1	no
13101.m06411	LOC_Os01g60250.1	=	pentatricopeptide, putative, expressed	chr01:34840572-34844689	LOWDATA	0.0992288	0.236849	1.25514	0	1	1	no	NOTEST	0.144334	0.252514	0.806954	-0.180735	0.856575	1	no	NOTEST	0.197105	0.230802	0.22769	-0.0321553	0.974348	1	no	NOTEST	0	0	0	0	1	1	no
13101.m06602	LOC_Os01g61814.1	=	40S ribosomal protein S23, putative, expressed	chr01:35731621-35764172	LOWDATA	45.9946	43.042	-0.0957171	0	1	1	no	LOWDATA	55.8988	18.6041	-1.5872	0	1	1	no	LOWDATA	81.8517	64.4365	-0.345135	0	1	1	no	LOWDATA	73.3996	52.1162	-0.494041	0	1	1	no
13101.m06607	LOC_Os01g61860.1	=	TBC domain containing protein, expressed	chr01:35783418-35792885	LOWDATA	13.3814	11.7157	-0.191786	0	1	1	no	OK	11.5209	5.40905	-1.09081	1.44649	0.14804	0.455687	no	LOWDATA	8.97571	11.7657	0.390483	0	1	1	no	LOWDATA	14.8764	9.68332	-0.619449	0	1	1	no
13101.m06621	LOC_Os01g61970.1	=	Lung seven transmembrane receptor domain containing protein, putative, expressed	chr01:35869930-36045572	LOWDATA	5.49239	7.27371	0.405258	0	1	1	no	LOWDATA	14.8017	2.99172	-2.30672	0	1	1	no	LOWDATA	12.9608	4.85359	-1.41703	0	1	1	no	LOWDATA	7.12012	4.98408	-0.514575	0	1	1	no
13101.m06624	LOC_Os01g61990.1	=	ankyrin repeat-containing protein, putative, expressed	chr01:35869930-36045572	LOWDATA	7.88142	11.9253	0.597495	0	1	1	no	LOWDATA	0.6034	2.7531	2.18987	0	1	1	no	LOWDATA	1.84313	18.6939	3.34234	0	1	1	no	OK	3.91256	15.7739	2.01135	-1.12171	0.261987	0.933172	no
13101.m14966	LOC_Os01g61990.2	=	ankyrin repeat-containing protein, putative, expressed	chr01:35869930-36045572	LOWDATA	4.23576	11.1631	1.39804	0	1	1	no	LOWDATA	7.49324	3.98277	-0.911819	0	1	1	no	LOWDATA	4.49958	3.63022	-0.309735	0	1	1	no	LOWDATA	4.04529	1.91678	-1.07756	0	1	1	no
13101.m06640	LOC_Os01g62070.2	=	cation efflux family protein, putative, expressed	chr01:35869930-36045572	LOWDATA	1.85067	0.538431	-1.78122	0	1	1	no	LOWDATA	0.806739	0.717402	-0.169319	0	1	1	no	LOWDATA	0.551604	3.62476	2.71618	0	1	1	no	LOWDATA	0.166507	1.31603	2.98254	0	1	1	no
13101.m06638	LOC_Os01g62070.1	=	cation efflux family protein, putative, expressed	chr01:35869930-36045572	LOWDATA	19.1107	30.869	0.691776	0	1	1	no	LOWDATA	9.71792	17.6295	0.859276	0	1	1	no	LOWDATA	18.6599	20.1502	0.110851	0	1	1	no	OK	6.36919	12.5879	0.982855	-0.311669	0.755292	1	no
13101.m15091	LOC_Os01g62080.2	=	serine/threonine-protein kinase AFC1, putative, expressed	chr01:35869930-36045572	LOWDATA	0.555267	2.08769	1.91065	0	1	1	no	LOWDATA	0.9336	0.863767	-0.112162	0	1	1	no	LOWDATA	0.36724	0.818427	1.15613	0	1	1	no	NOTEST	0.429261	0.64609	0.58988	-0.0535506	0.957293	1	no
13101.m06654	LOC_Os01g62200.1	=	domain of unknown function DUF966 domain containing protein, expressed	chr01:35869930-36045572	LOWDATA	3.61388	0.906055	-1.99588	0	1	1	no	LOWDATA	6.55419	4.87924	-0.425762	0	1	1	no	LOWDATA	4.76525	4.09275	-0.219482	0	1	1	no	OK	9.09612	6.9367	-0.391001	0.600853	0.547938	1	no
13101.m15092	LOC_Os01g62200.2	=	domain of unknown function DUF966 domain containing protein, expressed	chr01:35869930-36045572	LOWDATA	0.325118	0.222443	-0.547532	0	1	1	no	LOWDATA	0.769206	2.4637	1.67938	0	1	1	no	LOWDATA	0.197286	0.45327	1.20008	0	1	1	no	NOTEST	0.194826	0	0	0	1	1	no
13101.m06659	LOC_Os01g62244.1	=	ubiquitin-conjugating enzyme, putative, expressed	chr01:35869930-36045572	LOWDATA	25.2303	23.2386	-0.118636	0	1	1	no	LOWDATA	29.6442	14.1017	-1.07188	0	1	1	no	LOWDATA	26.1947	26.6344	0.0240122	0	1	1	no	OK	25.0582	25.1059	0.00273905	-0.0010824	0.999136	1	no
13101.m06660	LOC_Os01g62244.2	=	ubiquitin-conjugating enzyme, putative, expressed	chr01:35869930-36045572	LOWDATA	0.386057	1.84245	2.25474	0	1	1	no	LOWDATA	0.898605	3.34189	1.89491	0	1	1	no	LOWDATA	0.798279	0.187604	-2.0892	0	1	1	no	NOTEST	0	0	0	0	1	1	no
13101.m06666	LOC_Os01g62300.1	=	SLT1 protein, putative, expressed	chr01:35869930-36045572	LOWDATA	17.3195	23.5097	0.440853	0	1	1	no	LOWDATA	22.7909	17.5772	-0.374756	0	1	1	no	LOWDATA	13.5167	15.9273	0.236761	0	1	1	no	OK	16.038	14.7363	-0.122127	0.0721738	0.942464	1	no
13101.m06750	LOC_Os01g62910.1	=	CRR2, putative, expressed	chr01:36429890-36448908	LOWDATA	0.266392	0.640439	1.26551	0	1	1	no	LOWDATA	0.639081	0.276437	-1.20905	0	1	1	no	LOWDATA	0.388073	0.161053	-1.2688	0	1	1	no	LOWDATA	0.205052	0.291898	0.509476	0	1	1	no
13101.m06858	LOC_Os01g63880.1	=	expressed protein	chr01:37058530-37089988	LOWDATA	3.31875	0.993224	-1.74045	0	1	1	no	OK	4.09605	2.14554	-0.932893	0.460607	0.645081	0.866392	no	OK	2.46235	0	0	0	1	1	no	NOTEST	0	0	0	0	1	1	no
13101.m07029	LOC_Os01g65094.1	=	expressed protein	chr01:37778264-37867509	LOWDATA	1.21081	1.11731	-0.115952	0	1	1	no	LOWDATA	2.20892	1.22873	-0.846165	0	1	1	no	LOWDATA	3.06153	2.27016	-0.431457	0	1	1	no	LOWDATA	2.22441	1.21523	-0.872198	0	1	1	no
13101.m07043	LOC_Os01g65220.1	=	XRN 5'-3' exonuclease N-terminus domain containing protein, expressed	chr01:37778264-37867509	LOWDATA	6.72148	6.57567	-0.0316418	0	1	1	no	LOWDATA	8.09082	7.5785	-0.094374	0	1	1	no	LOWDATA	6.40147	9.16868	0.518311	0	1	1	no	LOWDATA	11.1034	8.36733	-0.408165	0	1	1	no
13101.m07044	LOC_Os01g65230.1	=	AGC_AGC_other_PDK1_Pk61C.1 - ACG kinases include homologs to PKA, PKG and PKC, expressed	chr01:37778264-37867509	LOWDATA	15.812	15.2613	-0.0511375	0	1	1	no	LOWDATA	11.9593	6.98497	-0.775808	0	1	1	no	LOWDATA	8.2783	7.48308	-0.145702	0	1	1	no	LOWDATA	11.2064	6.16951	-0.861094	0	1	1	no
13101.m07047	LOC_Os01g65260.1	=	amidophosphoribosyltransferase, chloroplast precursor, putative, expressed	chr01:37778264-37867509	LOWDATA	5.62857	5.98598	0.0888192	0	1	1	no	LOWDATA	9.31581	5.47534	-0.766734	0	1	1	no	LOWDATA	5.53462	3.68197	-0.588008	0	1	1	no	LOWDATA	4.06291	3.4666	-0.228994	0	1	1	no
13101.m07057	LOC_Os01g65350.2	=	deoxynucleoside kinase family, putative, expressed	chr01:37913713-37917955	LOWDATA	0.22226	0.117609	-0.918248	0	1	1	no	NOTEST	0.211845	0	0	0	1	1	no	LOWDATA	0.029346	0.110813	1.91689	0	1	1	no	NOTEST	0	0	0	0	1	1	no
13101.m07092	LOC_Os01g65620.1	=	expressed protein	chr01:38097893-38119717	LOWDATA	1.04912	1.40961	0.426118	0	1	1	no	NOTEST	0.156231	0	0	0	1	1	no	LOWDATA	1.61198	2.18131	0.436356	0	1	1	no	LOWDATA	0.602666	1.58626	1.3962	0	1	1	no
13101.m07093	LOC_Os01g65630.1	=	expressed protein	chr01:38097893-38119717	LOWDATA	1.66087	1.11724	-0.571998	0	1	1	no	OK	4.2528	2.4951	-0.769311	0.374979	0.707676	0.899716	no	NOTEST	1.48755	0	0	0	1	1	no	LOWDATA	1.56997	1.1859	-0.404748	0	1	1	no
13101.m07102	LOC_Os01g65692.1	=	expressed protein	chr01:38138056-38170866	LOWDATA	0.148182	0.238875	0.688885	0	1	1	no	LOWDATA	0.215411	0.189479	-0.185055	0	1	1	no	NOTEST	0.0841721	0.108352	0.36431	-0.0817492	0.934846	1	no	NOTEST	0.0786794	0	-1e+300	-1e+300	0.0786496	1	no
13101.m07135	LOC_Os01g65970.1	=	transcription factor HBP-1b, putative	chr01:38286839-38323127	LOWDATA	0.122326	0.0216775	-2.49646	0	1	1	no	LOWDATA	1.03347	0.306738	-1.75241	0	1	1	no	LOWDATA	0.170644	0.174161	0.0294366	0	1	1	no	NOTEST	0.170544	0	0	0	1	1	no
13101.m07142	LOC_Os01g66030.1	=	OsMADS2 - MADS-box family gene with MIKCc type-box, expressed	chr01:38286839-38323127	LOWDATA	3.5382	3.09777	-0.191784	0	1	1	no	NOTEST	2.4087	1.97516	-0.286287	0.172689	0.862896	1	no	LOWDATA	3.6278	2.90818	-0.318979	0	1	1	no	NOTEST	2.24648	2.32792	0.0513806	-0.0366627	0.970754	1	no
13101.m07276	LOC_Os01g67110.1	=	expressed protein	chr01:38945432-38975514	LOWDATA	13.5967	1.77576	-2.93675	0	1	1	no	LOWDATA	14.7004	7.01177	-1.06801	0	1	1	no	LOWDATA	8.8294	0.343497	-4.68394	0	1	1	no	LOWDATA	5.9275	8.16582	0.462174	0	1	1	no
13101.m07277	LOC_Os01g67120.1	=	rhodanese-like domain containing protein, putative, expressed	chr01:38945432-38975514	LOWDATA	0.999299	0.665023	-0.587511	0	1	1	no	LOWDATA	4.93878	3.05408	-0.693418	0	1	1	no	OK	0	0	0	0	1	1	no	NOTEST	0	0	0	0	1	1	no
13101.m07447	LOC_Os01g68370.3	=	B3 DNA binding domain containing protein, expressed	chr01:39722111-39725945	LOWDATA	0	0	5.31533e-315	0	1	1	no	LOWDATA	0	0	5.31533e-315	0	1	1	no	LOWDATA	0	0	-1e+300	0	1	1	no	NOTEST	0	0	0	0	1	1	no
13101.m07445	LOC_Os01g68370.2	=	B3 DNA binding domain containing protein, expressed	chr01:39722111-39725945	LOWDATA	0	0	0	0	1	1	no	LOWDATA	0	0	0	0	1	1	no	NOTEST	0	0	0	0	1	1	no	NOTEST	0	0	0	0	1	1	no
13101.m07444	LOC_Os01g68370.4	=	B3 DNA binding domain containing protein, expressed	chr01:39722111-39725945	LOWDATA	0	0	0	0	1	1	no	LOWDATA	0	0	0	0	1	1	no	LOWDATA	0	0	-1e+300	0	1	1	no	NOTEST	0	0	0	0	1	1	no
13101.m07635	LOC_Os01g70300.1	=	aspartokinase 3, chloroplast precursor, putative, expressed	chr01:40694379-40711970	LOWDATA	6.53725	6.61359	0.0167516	0	1	1	no	LOWDATA	2.64669	1.25258	-1.07928	0	1	1	no	LOWDATA	4.48147	4.83709	0.110168	0	1	1	no	LOWDATA	2.59814	2.02351	-0.360618	0	1	1	no
13101.m07673	LOC_Os01g70570.3	=	acyltransferase, putative, expressed	chr01:40863864-40867313	LOWDATA	0.251227	0.292132	0.21763	0	1	1	no	LOWDATA	0.266085	0.182319	-0.545425	0	1	1	no	LOWDATA	0.0605526	0.0961099	0.666496	0	1	1	no	NOTEST	0	0	0	0	1	1	no
13101.m07754	LOC_Os01g71210.1	=	expressed protein	chr01:41192234-41218746	LOWDATA	7.51609	9.08716	0.273848	0	1	1	no	LOWDATA	9.77884	12.9751	0.408012	0	1	1	no	LOWDATA	6.35101	7.52277	0.244279	0	1	1	no	LOWDATA	10.7756	10.8649	0.0119117	0	1	1	no
13101.m07802	LOC_Os01g71620.1	=	expressed protein	chr01:41396704-41525372	LOWDATA	0.160818	0.225152	0.485473	0	1	1	no	NOTEST	0.582115	0	0	0	1	1	no	LOWDATA	0.0747235	0.13825	0.887644	0	1	1	no	NOTEST	0.81836	0	0	0	1	1	no
13101.m07815	LOC_Os01g71700.1	=	amino acid permease family protein, putative, expressed	chr01:41538609-41559016	LOWDATA	0.574801	2.09663	1.86694	0	1	1	no	NOTEST	0.156367	0.222053	0.50597	-0.137086	0.890963	1	no	NOTEST	0.229105	0.993305	2.11623	-2.50873	0.0121166	1	no	NOTEST	0.220104	2.58401	3.55335	-4.55139	5.32914e-06	1	no
13101.m07816	LOC_Os01g71710.1	=	amino acid permease family protein, putative, expressed	chr01:41538609-41559016	LOWDATA	1.49904	2.92575	0.964763	0	1	1	no	NOTEST	0.335955	0.0492478	-2.77014	1.02979	0.303107	1	no	OK	2.08929	0.804248	-1.3773	0.470802	0.637782	1	no	NOTEST	0.255622	1.1483	2.16742	-2.69599	0.00701792	1	no
13101.m07849	LOC_Os01g72049.2	=	retrotransposon, putative, centromere-specific, expressed	chr01:41780266-41807035	LOWDATA	0.0323249	0.0335532	0.0538027	0	1	1	no	LOWDATA	0.128875	0.0433751	-1.57104	0	1	1	no	LOWDATA	0.0497372	0.0615485	0.307399	0	1	1	no	LOWDATA	0.0683348	0.0932067	0.447814	0	1	1	no
13101.m07878	LOC_Os01g72320.1	=	FYVE zinc finger domain containing protein, expressed	chr01:41916655-41931844	LOWDATA	0.270052	0.27707	0.0370133	0	1	1	no	NOTEST	0.50143	0	0	0	1	1	no	NOTEST	0	0	0	0	1	1	no	NOTEST	0	0	0	0	1	1	no
13101.m07900	LOC_Os01g72490.2	=	LRP1, putative, expressed	chr01:42016108-42038678	LOWDATA	0.340304	0.864946	1.34578	0	1	1	no	NOTEST	0	0	0	0	1	1	no	LOWDATA	0.5052	0.144186	-1.80892	0	1	1	no	NOTEST	0.456987	0	0	0	1	1	no
13101.m07914	LOC_Os01g72620.1	=	conserved hypothetical protein	chr01:42114687-42134910	LOWDATA	0.0796096	0.111961	0.491976	0	1	1	no	NOTEST	0.15734	0	0	0	1	1	no	NOTEST	0.029791	0.0465016	0.642401	-0.405975	0.684761	1	no	NOTEST	0	0	0	0	1	1	no
13101.m08016	LOC_Os01g73470.1	=	growth inhibition and differentiation-related protein 88, putative, expressed	chr01:42566788-42596958	LOWDATA	10.9739	13.0427	0.249166	0	1	1	no	OK	9.35686	8.90593	-0.0712587	0.114465	0.908869	0.984991	no	LOWDATA	6.70242	8.31753	0.311474	0	1	1	no	LOWDATA	9.18645	8.87748	-0.0493572	0	1	1	no
13101.m08018	LOC_Os01g73490.1	=	expressed protein	chr01:42566788-42596958	LOWDATA	0.946535	0.754542	-0.327056	0	1	1	no	LOWDATA	1.42511	1.40488	-0.0206326	0	1	1	no	LOWDATA	1.48821	1.17415	-0.341959	0	1	1	no	NOTEST	2.64757	1.51187	-0.808335	1.07444	0.282623	1	no
13101.m08019	LOC_Os01g73500.1	=	expressed protein	chr01:42566788-42596958	LOWDATA	14.9671	40.9625	1.45251	0	1	1	no	LOWDATA	10.4834	15.0218	0.518948	0	1	1	no	LOWDATA	18.3356	29.0205	0.662425	0	1	1	no	OK	8.43812	14.8222	0.812768	-1.07411	0.282773	0.955341	no
13101.m15122	LOC_Os01g73500.2	=	expressed protein	chr01:42566788-42596958	LOWDATA	5.96726	5.93018	-0.00899272	0	1	1	no	LOWDATA	0.824144	3.36884	2.03128	0	1	1	no	LOWDATA	0.977223	2.56347	1.39134	0	1	1	no	OK	1.77787	11.7705	2.72695	-0.991617	0.321384	0.993553	no
13101.m08036	LOC_Os01g73644.1	=	expressed protein	chr01:42662056-42670548	LOWDATA	0.476861	0.296399	-0.686025	0	1	1	no	NOTEST	0	0	0	0	1	1	no	NOTEST	0	0	0	0	1	1	no	NOTEST	0	0	0	0	1	1	no
13101.m08060	LOC_Os01g73840.1	=	expressed protein	chr01:42751765-42798446	LOWDATA	1.67146	0.576074	-1.53678	0	1	1	no	NOTEST	0.911318	1.08382	0.250101	-0.07398	0.941026	1	no	LOWDATA	0.401278	0.725794	0.85496	0	1	1	no	NOTEST	0	0	0	0	1	1	no
13102.m00005	LOC_Os02g01030.3	=	tetratricopeptide repeat domain containing protein, expressed	chr02:3513-27108	LOWDATA	2.86733	5.28158	0.881262	0	1	1	no	OK	4.29229	4.55057	0.0842988	-0.0418879	0.966588	1	no	OK	1.95138	0.613273	-1.66989	1.41818	0.156138	0.667061	no	NOTEST	1.13084	2.90699	1.36214	-1.50887	0.131333	1	no
13102.m00004	LOC_Os02g01030.2	=	tetratricopeptide repeat domain containing protein, expressed	chr02:3513-27108	LOWDATA	25.1574	17.3785	-0.533677	0	1	1	no	OK	17.5729	20.0177	0.187926	-0.311398	0.755498	0.922179	no	OK	21.3598	25.2836	0.2433	-0.323905	0.74601	1	no	OK	26.2449	32.8317	0.323053	-0.564339	0.572523	1	no
13102.m00032	LOC_Os02g01190.2	=	POEI25 - Pollen Ole e I allergen and extensin family protein precursor, expressed	chr02:110751-112365	LOWDATA	0.0954278	0.173043	0.858653	0	1	1	no	NOTEST	0	0	0	0	1	1	no	NOTEST	0	0	0	0	1	1	no	NOTEST	0	0	0	0	1	1	no
13102.m00101	LOC_Os02g01760.1	=	diphosphomevalonate decarboxylase family protein	chr02:410422-488077	LOWDATA	6.28674	5.00662	-0.328475	0	1	1	no	LOWDATA	2.98086	2.40077	-0.312228	0	1	1	no	LOWDATA	3.40263	4.93941	0.537686	0	1	1	no	OK	4.96868	3.7065	-0.422805	0.529817	0.596239	1	no
13102.m00107	LOC_Os02g01800.1	=	receptor-like protein kinase precursor, putative	chr02:410422-488077	LOWDATA	0.708217	2.65644	1.90723	0	1	1	no	LOWDATA	0.260166	0.0896213	-1.53752	0	1	1	no	LOWDATA	0.305342	1.20859	1.98483	0	1	1	no	LOWDATA	0.134796	0.326144	1.27474	0	1	1	no
13102.m00147	LOC_Os02g02130.1	=	ribosomal protein L37, putative	chr02:633598-635916	LOWDATA	101.688	99.0372	-0.0381124	0	1	1	no	LOWDATA	103.321	83.1979	-0.312507	0	1	1	no	LOWDATA	150.206	92.8332	-0.694227	0	1	1	no	OK	118.584	69.9896	-0.760692	1.34863	0.177456	0.798489	no
13102.m00195	LOC_Os02g02530.1	=	signal peptide peptidase domain containing protein, expressed	chr02:906563-911664	LOWDATA	11.7556	11.4401	-0.039249	0	1	1	no	LOWDATA	12.9546	7.29463	-0.828552	0	1	1	no	OK	10.62	9.5603	-0.151653	0.232262	0.816335	1	no	OK	11.7606	8.02853	-0.550748	0.917241	0.359016	1	no
13102.m00246	LOC_Os02g02890.1	=	peptidyl-prolyl cis-trans isomerase, putative, expressed	chr02:1116058-1132700	LOWDATA	1.53156	3.56614	1.21936	0	1	1	no	LOWDATA	1.59458	3.91347	1.29527	0	1	1	no	LOWDATA	2.73761	9.74002	1.83101	0	1	1	no	LOWDATA	4.46279	2.59623	-0.781528	0	1	1	no
13102.m00462	LOC_Os02g04440.3	=	transducin family protein, putative, expressed	chr02:1955267-1965696	LOWDATA	0.332778	0.488505	0.553815	0	1	1	no	NOTEST	0.321185	0	0	0	1	1	no	NOTEST	0	0	0	0	1	1	no	NOTEST	0	0	0	0	1	1	no
13102.m00465	LOC_Os02g04450.3	=	plant-specific domain TIGR01589 family protein, putative, expressed	chr02:1967697-1974958	LOWDATA	0.478934	0.457225	-0.0669232	0	1	1	no	LOWDATA	0.427849	0.0834025	-2.35894	0	1	1	no	LOWDATA	0.0948869	0.287036	1.59695	0	1	1	no	LOWDATA	0.130106	0.0959173	-0.439827	0	1	1	no
13102.m00472	LOC_Os02g04500.2	=	S-adenosyl-L-methionine-dependent methyltransferase mraW, putative, expressed	chr02:1985733-2009980	LOWDATA	2.39509	0.974967	-1.29665	0	1	1	no	OK	4.47776	0.959204	-2.22287	1.10318	0.269949	0.600672	no	OK	2.93489	1.11393	-1.39764	0.66428	0.506511	0.987747	no	OK	4.20068	1.53434	-1.45301	0.600236	0.548349	1	no
13102.m00475	LOC_Os02g04520.2	=	AGG2, putative, expressed	chr02:1985733-2009980	LOWDATA	1.38003	1.42106	0.0422658	0	1	1	no	NOTEST	2.07182	0.47586	-2.12229	0.2899	0.771892	1	no	NOTEST	0.415831	0.476268	0.195777	-0.0279491	0.977703	1	no	LOWDATA	0.157554	0.303846	0.947495	0	1	1	no
13102.m00474	LOC_Os02g04520.1	=	AGG2, putative, expressed	chr02:1985733-2009980	LOWDATA	16.3956	19.5043	0.250487	0	1	1	no	LOWDATA	9.94341	15.9312	0.680046	0	1	1	no	OK	6.35408	13.9975	1.13942	-0.683091	0.494549	0.981031	no	OK	10.9705	14.6697	0.419203	-0.310574	0.756124	1	no
13102.m00530	LOC_Os02g04970.1	=	expressed protein	chr02:2318088-2551238	LOWDATA	1.90224	1.10798	-0.779767	0	1	1	no	NOTEST	0	0	0	0	1	1	no	LOWDATA	1.38651	1.24135	-0.15955	0	1	1	no	OK	3.98645	0	-1e+300	-1e+300	0.0140244	0.179993	no
13102.m00533	LOC_Os02g05000.1	=	expressed protein	chr02:2318088-2551238	LOWDATA	4.58681	5.99835	0.387075	0	1	1	no	NOTEST	0	0	0	0	1	1	no	LOWDATA	5.94843	3.61588	-0.718163	0	1	1	no	LOWDATA	0.552113	0	-1e+300	0	1	1	no
13102.m00534	LOC_Os02g05020.1	=	expressed protein	chr02:2318088-2551238	LOWDATA	3.50395	3.81202	0.121573	0	1	1	no	NOTEST	0	0	0	0	1	1	no	LOWDATA	2.70799	2.9158	0.106667	0	1	1	no	LOWDATA	2.91739	0	-1e+300	0	1	1	no
13102.m00555	LOC_Os02g05199.4	=	expressed protein	chr02:2318088-2551238	LOWDATA	0.028302	0.319988	3.49904	0	1	1	no	NOTEST	0	0	0	0	1	1	no	LOWDATA	1.22172	1.33143	0.124066	0	1	1	no	NOTEST	0	0	0	0	1	1	no
13102.m00554	LOC_Os02g05199.3	=	expressed protein	chr02:2318088-2551238	LOWDATA	2.11844	0.938294	-1.17489	0	1	1	no	NOTEST	0	0	0	0	1	1	no	LOWDATA	0.553108	0.0202819	-4.7693	0	1	1	no	NOTEST	0	0	0	0	1	1	no
13102.m00552	LOC_Os02g05199.1	=	expressed protein	chr02:2318088-2551238	LOWDATA	0.583426	0.52088	-0.163599	0	1	1	no	NOTEST	0	0	0	0	1	1	no	LOWDATA	0.22874	0.941431	2.04115	0	1	1	no	NOTEST	0	0	0	0	1	1	no
13102.m00563	LOC_Os02g05244.2	=	expressed protein	chr02:2318088-2551238	LOWDATA	3.43289	4.66954	0.443857	0	1	1	no	NOTEST	0	0	0	0	1	1	no	LOWDATA	3.69175	6.77582	0.876093	0	1	1	no	LOWDATA	6.33081	0	-1e+300	0	1	1	no
13102.m00562	LOC_Os02g05244.1	=	expressed protein	chr02:2318088-2551238	LOWDATA	1.29392	0.981915	-0.398078	0	1	1	no	NOTEST	0	0	0	0	1	1	no	LOWDATA	0.432348	0.121092	-1.83609	0	1	1	no	LOWDATA	0.260808	0	-1e+300	0	1	1	no
13102.m00573	LOC_Os02g05310.3	=	splicing factor 3B subunit 1, putative, expressed	chr02:2318088-2551238	LOWDATA	4.132	6.08329	0.558013	0	1	1	no	NOTEST	0	0	0	0	1	1	no	LOWDATA	1.58964	5.49609	1.78971	0	1	1	no	OK	6.81283	0	-1e+300	-1e+300	0.00108461	0.0272965	yes
13102.m00571	LOC_Os02g05310.4	=	splicing factor 3B subunit 1, putative, expressed	chr02:2318088-2551238	LOWDATA	4.33534	3.14748	-0.461946	0	1	1	no	NOTEST	0	0	0	0	1	1	no	LOWDATA	0.817611	4.59708	2.49123	0	1	1	no	NOTEST	0	0	0	0	1	1	no
13102.m00570	LOC_Os02g05310.1	=	splicing factor 3B subunit 1, putative, expressed	chr02:2318088-2551238	LOWDATA	0.156067	2.80426	4.16739	0	1	1	no	NOTEST	0	0	0	0	1	1	no	LOWDATA	5.74693	1.73247	-1.72996	0	1	1	no	NOTEST	1.60248	0	-1e+300	-1e+300	0.0120361	1	no
13102.m00605	LOC_Os02g05530.1	=	hypothetical protein	chr02:2664367-2676611	LOWDATA	0.0904763	0.394382	2.12398	0	1	1	no	LOWDATA	0.753392	1.39858	0.892489	0	1	1	no	NOTEST	0.130279	0.134162	0.0423816	-0.0404795	0.967711	1	no	LOWDATA	0.2804	0.605071	1.10962	0	1	1	no
13102.m00622	LOC_Os02g05680.2	=	apoptosis-inducing factor 2, putative, expressed	chr02:2776404-2779384	LOWDATA	0.182828	0.0655134	-1.48062	0	1	1	no	LOWDATA	0.167693	0.121576	-0.463957	0	1	1	no	LOWDATA	0.129537	0.0821613	-0.656834	0	1	1	no	NOTEST	0.0738282	0	0	0	1	1	no
13102.m00636	LOC_Os02g05780.1	=	conserved hypothetical protein	chr02:2824357-2849783	LOWDATA	0.653719	1.7657	1.4335	0	1	1	no	LOWDATA	3.9974	3.86416	-0.0489095	0	1	1	no	LOWDATA	0.262515	0.155687	-0.753748	0	1	1	no	LOWDATA	2.53683	3.05081	0.266165	0	1	1	no
13102.m00662	LOC_Os02g06010.1	=	integral membrane protein, putative, expressed	chr02:2995482-3001135	LOWDATA	0	0	5.32571e-315	0	1	1	no	NOTEST	3.04271	0.298519	-3.34946	4.47619	7.59876e-06	1	no	LOWDATA	0	0	5.31533e-315	0	1	1	no	NOTEST	1.11793	2.04741	0.872968	-1.20976	0.22637	1	no
13102.m00715	LOC_Os02g06490.1	=	vacuolar protein sorting-associated protein 4, putative, expressed	chr02:3212370-3249839	LOWDATA	0.306949	0.223452	-0.458034	0	1	1	no	NOTEST	0	0	0	0	1	1	no	LOWDATA	0.690474	0.540222	-0.354035	0	1	1	no	LOWDATA	0.563825	0.866083	0.619256	0	1	1	no
13102.m00743	LOC_Os02g06670.1	=	retrotransposon protein, putative, unclassified, expressed	chr02:3343428-3386529	LOWDATA	1.90747	2.44462	0.357947	0	1	1	no	FAIL	2.15789	4.02912	0	0	1	1	no	FAIL	0	0	0	0	1	1	no	FAIL	0	4.03161	0	0	1	1	no
13102.m00744	LOC_Os02g06690.1	=	plastocyanin-like domain containing protein, putative, expressed	chr02:3343428-3386529	LOWDATA	0.971649	1.38871	0.515243	0	1	1	no	FAIL	1.75435	1.14407	0	0	1	1	no	FAIL	0	0	0	0	1	1	no	FAIL	0	0.693563	0	0	1	1	no
13102.m00804	LOC_Os02g07150.1	=	urease accessory protein F, putative, expressed	chr02:3674563-3680165	LOWDATA	0.145038	0.152229	0.0698035	0	1	1	no	NOTEST	0.214376	0.0439406	-2.28652	2.0298	0.0423765	1	no	LOWDATA	0.161922	0.0720919	-1.16739	0	1	1	no	NOTEST	0.0232421	0.0833321	1.84213	-1.25804	0.208378	1	no
13102.m00820	LOC_Os02g07230.3	=	porphobilinogen deaminase, chloroplast precursor, putative, expressed	chr02:3715182-3731359	LOWDATA	0.654137	0.276103	-1.24439	0	1	1	no	NOTEST	2.42081	0	0	0	1	1	no	LOWDATA	0.788887	1.75638	1.15471	0	1	1	no	LOWDATA	1.47515	0.775935	-0.926856	0	1	1	no
13102.m01059	LOC_Os02g09670.1	=	MYB protein, putative, expressed	chr02:4966916-4998243	LOWDATA	0.111232	0.209472	0.913187	0	1	1	no	NOTEST	1.23214	0.440322	-1.48453	0.247039	0.804878	1	no	NOTEST	0	0	0	0	1	1	no	NOTEST	0	0	0	0	1	1	no
13102.m01266	LOC_Os02g11740.1	=	plastidic ATP/ADP-transporter, putative, expressed	chr02:6057099-6060286	LOWDATA	21.9621	28.6416	0.383093	0	1	1	no	OK	42.546	33.1328	-0.360764	1.06183	0.288311	0.618178	no	LOWDATA	21.8456	27.9901	0.357573	0	1	1	no	LOWDATA	37.4304	33.4264	-0.163222	0	1	1	no
13102.m01373	LOC_Os02g12570.1	=	pre-mRNA cleavage complex II protein Clp1, putative, expressed	chr02:6568142-6572545	LOWDATA	8.90968	10.4401	0.22869	0	1	1	no	OK	10.3615	7.48089	-0.469956	0.763725	0.445031	0.743274	no	OK	9.79064	10.0906	0.0435434	-0.06514	0.948063	1	no	OK	13.5622	10.6907	-0.343227	0.581003	0.561239	1	no
13102.m01417	LOC_Os02g12870.1	=	expressed protein	chr02:6783660-6795183	LOWDATA	1.16671	2.77507	1.25008	0	1	1	no	LOWDATA	0.969613	1.03807	0.09842	0	1	1	no	NOTEST	1.57189	1.09368	-0.52331	0.0341181	0.972783	1	no	LOWDATA	0.353687	1.32943	1.91026	0	1	1	no
13102.m01419	LOC_Os02g12870.3	=	expressed protein	chr02:6783660-6795183	LOWDATA	0.494295	0.630877	0.351987	0	1	1	no	NOTEST	0	0	0	0	1	1	no	NOTEST	0	0	0	0	1	1	no	LOWDATA	0.147344	0.563128	1.93427	0	1	1	no
13102.m01432	LOC_Os02g12919.1	=	hypothetical protein	chr02:6814983-6835681	LOWDATA	1.56345	1.93872	0.310374	0	1	1	no	OK	56.8192	12.5704	-2.17635	2.51982	0.0117414	0.110782	no	NOTEST	0	1.43766	1e+300	1e+300	0.158655	1	no	OK	43.8459	12.5615	-1.80344	1.9853	0.0471116	0.411289	no
13102.m01459	LOC_Os02g13150.2	=	pollen-specific protein SF21, putative, expressed	chr02:6979505-7010690	LOWDATA	0.698624	2.19655	1.65265	0	1	1	no	LOWDATA	1.75526	0.325174	-2.4324	0	1	1	no	NOTEST	0	0	0	0	1	1	no	NOTEST	0	0	0	0	1	1	no
13102.m01475	LOC_Os02g13300.1	=	mitochondrial carrier protein, putative, expressed	chr02:7083193-7087390	LOWDATA	8.65738	22.5401	1.38049	0	1	1	no	OK	2.76849	4.98891	0.849626	-1.07595	0.281949	0.613134	no	OK	2.81526	11.2696	2.0011	-2.94087	0.00327296	0.0660771	no	NOTEST	1.56963	1.29773	-0.274439	0.345367	0.729819	1	no
13102.m01540	LOC_Os02g13850.1	=	leucine-rich repeat-containing protein kinase family protein, putative, expressed	chr02:7491164-7513624	LOWDATA	0.564275	0.848236	0.588066	0	1	1	no	FAIL	0.634729	0	0	0	1	1	no	NOTEST	0	0	0	0	1	1	no	NOTEST	0	0	0	0	1	1	no
13102.m01555	LOC_Os02g13970.2	=	Complex I intermediate-associated protein 30 domain containing protein, putative, expressed	chr02:7612460-7627260	LOWDATA	4.65096	5.48617	0.238272	0	1	1	no	OK	9.92152	5.55427	-0.836963	0.67819	0.497651	0.776538	no	LOWDATA	3.01453	3.1339	0.0560251	0	1	1	no	OK	5.12338	6.16784	0.267668	-0.248065	0.804084	1	no
13102.m01554	LOC_Os02g13970.1	=	Complex I intermediate-associated protein 30 domain containing protein, putative, expressed	chr02:7612460-7627260	LOWDATA	7.74576	5.48472	-0.497987	0	1	1	no	OK	12.3054	4.94145	-1.31628	1.07773	0.281153	0.612388	no	LOWDATA	8.96562	7.76151	-0.208066	0	1	1	no	OK	10.5217	7.62981	-0.463647	0.517484	0.604818	1	no
13102.m01563	LOC_Os02g14000.4	=	actin-related protein 2/3 complex subunit 3, putative, expressed	chr02:7643701-7646134	LOWDATA	0.267364	0.388398	0.538728	0	1	1	no	LOWDATA	0.533112	0.126601	-2.07415	0	1	1	no	LOWDATA	0.154811	0.11269	-0.458154	0	1	1	no	NOTEST	0	0	0	0	1	1	no
13102.m01633	LOC_Os02g14710.1	=	expressed protein	chr02:8075859-8185017	LOWDATA	0.716463	1.59918	1.15837	0	1	1	no	NOTEST	2.08303	1.48908	-0.48426	0.425579	0.670414	1	no	LOWDATA	0.457959	0.39301	-0.220653	0	1	1	no	LOWDATA	1.42691	0.915709	-0.639937	0	1	1	no
13102.m01699	LOC_Os02g15230.1	=	GDSL-like lipase/acylhydrolase, putative, expressed	chr02:8490390-8515844	LOWDATA	29.9527	32.4937	0.117475	0	1	1	no	LOWDATA	31.4972	34.6392	0.137183	0	1	1	no	OK	26.1652	31.9395	0.287692	-0.51434	0.607014	1	no	OK	32.8059	39.3314	0.261729	-0.53881	0.590018	1	no
13102.m01891	LOC_Os02g16909.2	=	dynein light chain type 1 domain containing protein, expressed	chr02:9641060-9829487	LOWDATA	3.77985	10.4968	1.47356	0	1	1	no	OK	4.95564	11.3853	1.20002	-1.54399	0.122591	0.416053	no	LOWDATA	3.50992	11.9618	1.76892	0	1	1	no	OK	6.05941	10.0357	0.727895	-1.06099	0.288694	0.960574	no
13102.m01952	LOC_Os02g17470.1	=	RNA-binding protein-related, putative, expressed	chr02:10034581-10056704	LOWDATA	1.90767	2.51691	0.399844	0	1	1	no	NOTEST	2.10743	1.75654	-0.262745	0.193252	0.846761	1	no	OK	5.17991	7.04041	0.442733	-0.541365	0.588256	1	no	OK	5.484	5.38792	-0.0254999	0.025662	0.979527	1	no
13102.m02115	LOC_Os02g18870.1	=	GDSL-like lipase/acylhydrolase, putative, expressed	chr02:10994199-11060361	LOWDATA	0.889899	0.945701	0.0877421	0	1	1	no	NOTEST	1.32743	0.526932	-1.33295	0.652457	0.514106	1	no	NOTEST	1.65753	1.50837	-0.136046	0.00693404	0.994467	1	no	LOWDATA	1.51509	1.05055	-0.528259	0	1	1	no
13102.m02384	LOC_Os02g21269.2	=	expressed protein	chr02:12620193-12625647	LOWDATA	0.628901	0.868205	0.465202	0	1	1	no	NOTEST	0.350959	0.197572	-0.828928	0.3234	0.746393	1	no	LOWDATA	0.197735	0.271881	0.459408	0	1	1	no	LOWDATA	0.110601	0.159336	0.526717	0	1	1	no
13102.m02413	LOC_Os02g21530.1	=	expressed protein	chr02:12777672-12778925	LOWDATA	0.245866	0.131567	-0.902083	0	1	1	no	NOTEST	0.213454	0.218582	0.0342486	-0.0280011	0.977661	1	no	LOWDATA	0.243876	0.141117	-0.789253	0	1	1	no	NOTEST	0.707547	0.873706	0.304323	-0.235512	0.813811	1	no
13102.m02429	LOC_Os02g21660.3	=	L1P family of ribosomal proteins domain containing protein, expressed	chr02:12869456-12872468	LOWDATA	0.648109	0.432177	-0.584615	0	1	1	no	LOWDATA	0.8647	0.275225	-1.65159	0	1	1	no	LOWDATA	0.96846	0.210853	-2.19945	0	1	1	no	LOWDATA	0.468564	0.796775	0.765925	0	1	1	no
13102.m02452	LOC_Os02g21880.1	=	coiled-coil domain-containing protein, putative, expressed	chr02:13006930-13013221	LOWDATA	18.3656	23.0349	0.326815	0	1	1	no	LOWDATA	20.6801	18.6995	-0.145244	0	1	1	no	OK	12.5926	18.7848	0.576997	-0.883	0.377236	0.917391	no	OK	20.5354	19.333	-0.0870483	0.165473	0.868571	1	no
13102.m02974	LOC_Os02g27370.1	=	hypothetical protein	chr02:16109026-16129553	LOWDATA	8.33043	5.62039	-0.567719	0	1	1	no	LOWDATA	32.3067	13.8381	-1.22318	0	1	1	no	OK	11.142	0.55381	-4.33048	1.44726	0.147823	0.65161	no	LOWDATA	8.07909	8.32719	0.043637	0	1	1	no
13102.m02977	LOC_Os02g27400.1	=	OsFBX49 - F-box domain containing protein, expressed	chr02:16140745-16147172	LOWDATA	2.15755	4.62821	1.10106	0	1	1	no	NOTEST	2.45965	1.48289	-0.730043	0.894693	0.370951	1	no	NOTEST	0.592555	1.7823	1.58872	-0.787819	0.430802	1	no	NOTEST	1.36482	1.59313	0.223151	-0.219464	0.826288	1	no
13102.m03224	LOC_Os02g29550.3	=	AP2 domain containing protein, expressed	chr02:17569219-17576358	LOWDATA	0.215584	0.166257	-0.374835	0	1	1	no	LOWDATA	0.931083	0.161149	-2.53051	0	1	1	no	LOWDATA	0.257656	0.189758	-0.441281	0	1	1	no	LOWDATA	0.206162	0.433226	1.07134	0	1	1	no
13102.m03268	LOC_Os02g29980.1	=	X8 domain containing protein, expressed	chr02:17799563-17813305	LOWDATA	0.896691	0.949041	0.0818595	0	1	1	no	NOTEST	1.02389	0.902282	-0.182408	0.245633	0.805966	1	no	NOTEST	0.322265	0.342213	0.0866498	-0.088278	0.929656	1	no	NOTEST	0.800698	0.33229	-1.26881	1.38086	0.167321	1	no
13102.m03290	LOC_Os02g30180.1	=	ZOS2-07 - C2H2 zinc finger protein, expressed	chr02:17924748-17930547	LOWDATA	19.6839	23.3759	0.248	0	1	1	no	LOWDATA	14.6906	12.4239	-0.241771	0	1	1	no	OK	14.3965	22.0367	0.614191	-1.25052	0.211109	0.75266	no	OK	21.5754	23.2233	0.106183	-0.244105	0.807149	1	no
13102.m03515	LOC_Os02g32520.1	=	ERD1 protein, chloroplast precursor, putative, expressed	chr02:19245290-19257423	LOWDATA	11.3916	78.7583	2.78946	0	1	1	no	OK	9.10409	16.5404	0.86141	-1.46877	0.141895	0.445513	no	OK	10.317	122.913	3.57454	-5.84441	5.08358e-09	1.39557e-06	yes	OK	11.7979	46.2681	1.97149	-3.69851	0.000216871	0.0083967	yes
13102.m03517	LOC_Os02g32540.1	=	ubiquitin carboxyl-terminal hydrolase, family 1, putative, expressed	chr02:19245290-19257423	LOWDATA	0.902897	1.77803	0.977647	0	1	1	no	NOTEST	1.45707	2.06013	0.499664	-0.0190096	0.984833	1	no	LOWDATA	0.556885	0.823018	0.563543	0	1	1	no	NOTEST	1.2089	1.42059	0.232799	-0.000947606	0.999244	1	no
13102.m03854	LOC_Os02g35470.1	=	calmodulin binding protein, putative, expressed	chr02:21314056-21329757	LOWDATA	14.9171	27.1791	0.865534	0	1	1	no	OK	18.7677	15.789	-0.249336	0.379133	0.704589	0.898088	no	LOWDATA	12.8968	22.4701	0.800992	0	1	1	no	OK	16.4518	23.6852	0.525736	-0.906993	0.364411	1	no
13102.m03853	LOC_Os02g35470.4	=	calmodulin binding protein, putative, expressed	chr02:21314056-21329757	LOWDATA	13.2249	18.4061	0.476927	0	1	1	no	LOWDATA	16.1014	4.90671	-1.71436	0	1	1	no	LOWDATA	5.06203	17.4558	1.78592	0	1	1	no	OK	16.7455	15.868	-0.0776493	0.104846	0.916498	1	no
13102.m03881	LOC_Os02g35700.1	=	nucleoside diphosphate kinase, putative, expressed	chr02:21443720-21465343	LOWDATA	2.88262	4.23709	0.55569	0	1	1	no	OK	3.91343	3.41922	-0.194767	0.159536	0.873247	0.973972	no	OK	3.01822	3.01743	-0.000378866	0.00024671	0.999803	1	no	OK	4.76843	3.06873	-0.635874	0.527029	0.598174	1	no
13102.m03882	LOC_Os02g35700.2	=	nucleoside diphosphate kinase, putative, expressed	chr02:21443720-21465343	LOWDATA	0.840681	0.242359	-1.79442	0	1	1	no	NOTEST	0.333087	0.507171	0.606572	-0.0521665	0.958396	1	no	NOTEST	0.593156	0.195169	-1.60369	0.112646	0.910312	1	no	NOTEST	0	0	0	0	1	1	no
13102.m04061	LOC_Os02g37100.1	=	expressed protein	chr02:22409410-22426994	LOWDATA	4.05783	1.61276	-1.33117	0	1	1	no	NOTEST	0.00320356	0.00716263	1.16081	-0.0380586	0.969641	1	no	LOWDATA	3.66874	2.14003	-0.777652	0	1	1	no	NOTEST	0.897854	1.9114	1.09008	-0.902648	0.366713	1	no
13102.m04124	LOC_Os02g37694.1	=	expressed protein	chr02:22715321-22760534	LOWDATA	0.769211	0.507788	-0.599152	0	1	1	no	LOWDATA	0.37915	0.342156	-0.148116	0	1	1	no	LOWDATA	0.457058	0.501961	0.135198	0	1	1	no	LOWDATA	0.162657	0.225128	0.468911	0	1	1	no
13102.m04217	LOC_Os02g38340.1	=	actin, putative, expressed	chr02:23171546-23176296	LOWDATA	7.93366	10.8348	0.44961	0	1	1	no	OK	7.13025	6.52384	-0.128231	0.219754	0.826063	0.955061	no	OK	8.52812	10.6603	0.321943	-0.488587	0.625134	1	no	LOWDATA	11.0095	12.8752	0.225848	0	1	1	no
13102.m04271	LOC_Os02g38780.3	=	protein phosphatase 2C containing protein, expressed	chr02:23426659-23454894	LOWDATA	0	0	5.31533e-315	0	1	1	no	NOTEST	0.108415	0.0392503	-1.46578	0.0303382	0.975797	1	no	NOTEST	0	0	0	0	1	1	no	NOTEST	0.11726	0	-1e+300	-1e+300	0.481947	1	no
13102.m04270	LOC_Os02g38780.2	=	protein phosphatase 2C containing protein, expressed	chr02:23426659-23454894	LOWDATA	0	0	0	0	1	1	no	NOTEST	0	0	0	0	1	1	no	NOTEST	0	0	0	0	1	1	no	NOTEST	0	0	0	0	1	1	no
13102.m04269	LOC_Os02g38780.1	=	protein phosphatase 2C containing protein, expressed	chr02:23426659-23454894	LOWDATA	0	0	0	0	1	1	no	NOTEST	0	0	0	0	1	1	no	NOTEST	0	0	0	0	1	1	no	NOTEST	0	0	0	0	1	1	no
13102.m04273	LOC_Os02g38795.1	=	hypothetical protein	chr02:23426659-23454894	LOWDATA	0	0	0	0	1	1	no	NOTEST	0.303452	0.0635489	-2.25553	0.802497	0.422265	1	no	LOWDATA	0.0141152	0	-1e+300	0	1	1	no	NOTEST	0.0527763	0.0952558	0.851916	-0.567337	0.570485	1	no
13102.m04274	LOC_Os02g38800.1	=	26S proteasome non-ATPase regulatory subunit 6, putative, expressed	chr02:23426659-23454894	LOWDATA	0	0	0	0	1	1	no	NOTEST	2.1571	1.32114	-0.707305	0.594401	0.552244	1	no	LOWDATA	0.891035	0	-1e+300	0	1	1	no	NOTEST	0.948159	1.06557	0.168429	-0.12927	0.897144	1	no
13102.m04275	LOC_Os02g38804.1	=	protein phosphatase 2C containing protein, expressed	chr02:23426659-23454894	LOWDATA	0	0	0	0	1	1	no	NOTEST	0.0799799	1.21894	3.92984	-0.175139	0.86097	1	no	NOTEST	0	0	0	0	1	1	no	NOTEST	0	0.206194	1e+300	1e+300	0.107334	1	no
13102.m04356	LOC_Os02g39390.2	=	expressed protein	chr02:23753150-23769799	LOWDATA	3.24724	1.91898	-0.758873	0	1	1	no	LOWDATA	2.09094	1.31551	-0.66853	0	1	1	no	LOWDATA	0.40668	3.9147	3.26693	0	1	1	no	OK	4.58408	0	0	0	1	1	no
13102.m04355	LOC_Os02g39390.1	=	expressed protein	chr02:23753150-23769799	LOWDATA	3.39454	1.41917	-1.25817	0	1	1	no	OK	4.52371	2.14188	-1.07863	0.71626	0.473831	0.761808	no	LOWDATA	6.13613	1.34925	-2.18517	0	1	1	no	OK	6.2394	5.45166	-0.194711	0.21803	0.827405	1	no
13102.m04357	LOC_Os02g39400.1	=	isochorismatase family protein, putative, expressed	chr02:23753150-23769799	LOWDATA	12.535	21.5834	0.783957	0	1	1	no	OK	7.53763	4.90816	-0.618927	0.911709	0.361922	0.682095	no	LOWDATA	9.44522	18.071	0.936017	0	1	1	no	OK	7.43395	12.7642	0.779905	-1.14027	0.254174	0.922066	no
13102.m04396	LOC_Os02g39640.1	=	expressed protein	chr02:23907832-23910481	LOWDATA	0.283431	0.282336	-0.00558233	0	1	1	no	NOTEST	0.193113	0	0	0	1	1	no	LOWDATA	0.0591919	0.245295	2.05105	0	1	1	no	LOWDATA	0.20729	0.507221	1.29096	0	1	1	no
13102.m04437	LOC_Os02g39950.1	=	EF hand family protein, putative, expressed	chr02:24127313-24157295	LOWDATA	2.10174	2.61123	0.31314	0	1	1	no	LOWDATA	2.50823	0.965048	-1.378	0	1	1	no	LOWDATA	0.832299	1.69197	1.02353	0	1	1	no	LOWDATA	0.937052	1.76438	0.912962	0	1	1	no
13102.m04453	LOC_Os02g40030.2	=	transporter family protein, putative, expressed	chr02:24229793-24236689	LOWDATA	0.815162	1.00038	0.295397	0	1	1	no	NOTEST	1.38968	0.204531	-2.76435	0.145826	0.884059	1	no	LOWDATA	0.572127	0.520734	-0.135789	0	1	1	no	LOWDATA	0.723852	0.515582	-0.489494	0	1	1	no
13102.m04626	LOC_Os02g41860.4	=	aquaporin protein, putative, expressed	chr02:25156670-25160748	LOWDATA	1.76655	2.90544	0.717823	0	1	1	no	LOWDATA	4.23789	2.24963	-0.91366	0	1	1	no	LOWDATA	0.841799	1.22188	0.537552	0	1	1	no	LOWDATA	0.612557	3.85241	2.65285	0	1	1	no
13102.m04680	LOC_Os02g42310.3	=	OsSCP8 - Putative Serine Carboxypeptidase homologue, expressed	chr02:25437005-25448241	LOWDATA	0.986607	1.62876	0.723226	0	1	1	no	LOWDATA	0.905311	0.234586	-1.94829	0	1	1	no	LOWDATA	0.26237	0.264066	0.00929126	0	1	1	no	LOWDATA	0.403161	0.277942	-0.53657	0	1	1	no
13102.m04696	LOC_Os02g42374.3	=	e2f-associated phosphoprotein, putative, expressed	chr02:25474980-25492588	LOWDATA	0.160705	0.197333	0.296216	0	1	1	no	NOTEST	0.277116	0	0	0	1	1	no	NOTEST	0.119228	0	0	0	1	1	no	NOTEST	0	0	0	0	1	1	no
13102.m04804	LOC_Os02g43280.1	=	aldehyde dehydrogenase, putative, expressed	chr02:26028450-26079703	LOWDATA	23.7535	20.0404	-0.245232	0	1	1	no	LOWDATA	47.4298	26.7305	-0.827311	0	1	1	no	OK	17.3053	17.7235	0.034453	-0.0587783	0.953129	1	no	OK	37.9168	34.6347	-0.130619	0.290371	0.771532	1	no
13102.m04854	LOC_Os02g43690.3	=	ras-related protein, putative, expressed	chr02:26359919-26379814	LOWDATA	0.375814	0.675445	0.845818	0	1	1	no	NOTEST	0.73448	0	0	0	1	1	no	LOWDATA	0.190308	0.337498	0.82654	0	1	1	no	LOWDATA	0.13785	0.380231	1.46377	0	1	1	no
13102.m04876	LOC_Os02g43860.1	=	amino acid permease, putative, expressed	chr02:26481467-26509976	LOWDATA	7.81886	12.8836	0.720511	0	1	1	no	OK	8.77289	6.23227	-0.493294	0.675168	0.499569	0.778081	no	LOWDATA	8.56974	14.0986	0.718225	0	1	1	no	LOWDATA	7.07272	10.2267	0.532	0	1	1	no
13102.m04989	LOC_Os02g44610.1	=	protein kinase, putative, expressed	chr02:27017054-27029874	LOWDATA	0.396213	0.578425	0.545855	0	1	1	no	NOTEST	0	0	0	0	1	1	no	NOTEST	0	0.600451	1e+300	1e+300	0.319906	1	no	NOTEST	0	0	0	0	1	1	no
13102.m12435	LOC_Os02g46260.6	=	OsSCP9 - Putative Serine Carboxypeptidase homologue, expressed	chr02:28206196-28211408	LOWDATA	0.575449	0.897026	0.640461	0	1	1	no	NOTEST	0.389051	0	0	0	1	1	no	NOTEST	1.29456	0.799725	-0.694882	0.0833616	0.933564	1	no	LOWDATA	0.965195	0.377211	-1.35545	0	1	1	no
13102.m05278	LOC_Os02g46956.1	=	expressed protein	chr02:28663174-28666523	LOWDATA	11.358	12.9474	0.188942	0	1	1	no	OK	9.2966	10.9457	0.23559	-0.390777	0.695962	0.894355	no	OK	10.6894	13.2835	0.313452	-0.512149	0.608547	1	no	OK	11.4	10.0026	-0.188664	0.293271	0.769315	1	no
13102.m05302	LOC_Os02g47140.1	=	L11 domain containing ribosomal protein, putative, expressed	chr02:28767043-28768371	LOWDATA	59.537	57.3091	-0.0550223	0	1	1	no	LOWDATA	60.5092	65.3001	0.109931	0	1	1	no	OK	105.72	82.7584	-0.353273	0.778578	0.436228	0.951455	no	OK	99.6368	84.9144	-0.230669	0.579952	0.561947	1	no
13102.m05305	LOC_Os02g47160.1	=	OsWAK17 - OsWAK short gene, expressed	chr02:28771134-28794895	LOWDATA	1.0876	1.8907	0.797776	0	1	1	no	NOTEST	0.793684	0.994883	0.325963	-0.0257081	0.97949	1	no	NOTEST	0.61133	0.747844	0.290785	-0.010117	0.991928	1	no	LOWDATA	0.411682	0.713342	0.793066	0	1	1	no
13102.m05399	LOC_Os02g47850.2	=	class I glutamine amidotransferase, putative, expressed	chr02:29264186-29268775	LOWDATA	14.4333	13.5957	-0.0862516	0	1	1	no	OK	17.8163	10.3534	-0.783097	1.36808	0.171286	0.486728	no	OK	15.4987	19.5565	0.335498	-0.681343	0.495655	0.981396	no	OK	21.1084	19.5828	-0.108229	0.238199	0.811727	1	no
13102.m05402	LOC_Os02g47860.2	=	uridine kinase, putative, expressed	chr02:29271737-29301346	LOWDATA	3.32617	1.59765	-1.05791	0	1	1	no	LOWDATA	4.24586	0.415216	-3.35412	0	1	1	no	LOWDATA	2.4777	9.07213	1.87244	0	1	1	no	NOTEST	1.88902	0	-1e+300	-1e+300	0.180959	1	no
13102.m05413	LOC_Os02g47960.1	=	hypothetical protein	chr02:29330832-29332463	LOWDATA	0.205873	0.676984	1.71736	0	1	1	no	NOTEST	0	0	0	0	1	1	no	LOWDATA	0.470826	0.355861	-0.403879	0	1	1	no	NOTEST	0.317857	0	0	0	1	1	no
13102.m05433	LOC_Os02g48130.1	=	uncharacterized protein At1g26090, chloroplast precursor, putative, expressed	chr02:29457957-29462308	LOWDATA	0.402865	0.259326	-0.635533	0	1	1	no	NOTEST	0.345124	0	0	0	1	1	no	LOWDATA	0.279299	0.184786	-0.595955	0	1	1	no	LOWDATA	0.14127	0.267011	0.91844	0	1	1	no
13102.m05660	LOC_Os02g49840.3	=	OsMADS57 - MADS-box family gene with MIKCc type-box, expressed	chr02:30439026-30458332	LOWDATA	0.143777	0.126268	-0.187339	0	1	1	no	NOTEST	0.190004	0	0	0	1	1	no	NOTEST	0	0	0	0	1	1	no	NOTEST	0	0	0	0	1	1	no
13102.m05670	LOC_Os02g49930.1	=	retrotransposon protein, putative, unclassified	chr02:30494295-30535244	LOWDATA	0.155431	0.191085	0.29794	0	1	1	no	NOTEST	0.245908	0.0965666	-1.34853	0.287326	0.773863	1	no	NOTEST	0.0359339	0.13755	1.93654	-1.25955	0.207833	1	no	NOTEST	0.0510344	0.120184	1.2357	-0.190715	0.848749	1	no
13102.m05698	LOC_Os02g50210.1	=	erwinia induced protein 2, putative, expressed	chr02:30636522-30667304	LOWDATA	27.8086	37.2074	0.42006	0	1	1	no	OK	34.4406	58.2336	0.757742	-1.64854	0.0992422	0.376493	no	OK	25.9962	32.3783	0.316726	-0.596527	0.550823	1	no	OK	31.9246	49.2517	0.625505	-1.3877	0.165229	0.774291	no
13102.m05699	LOC_Os02g50220.1	=	expressed protein	chr02:30636522-30667304	LOWDATA	0.113487	0.938106	3.04722	0	1	1	no	NOTEST	0.239527	0.263914	0.139883	-0.0465668	0.962859	1	no	LOWDATA	0.0401651	0.290007	2.85207	0	1	1	no	NOTEST	0.243529	0.282041	0.211812	-0.075962	0.939449	1	no
13102.m05761	LOC_Os02g50760.3	=	heat shock protein DnaJ, putative, expressed	chr02:30988370-30993130	LOWDATA	0.444977	0.238342	-0.900697	0	1	1	no	LOWDATA	0.338564	0.521457	0.623119	0	1	1	no	LOWDATA	0.0844746	0.148683	0.815651	0	1	1	no	NOTEST	0.362682	0	0	0	1	1	no
13102.m05798	LOC_Os02g51030.1	=	methyltransferase domain containing protein, putative, expressed	chr02:31204312-31206884	LOWDATA	4.96635	6.52246	0.393231	0	1	1	no	LOWDATA	9.8513	7.78138	-0.340288	0	1	1	no	LOWDATA	6.47919	5.00873	-0.371367	0	1	1	no	OK	8.18342	8.17786	-0.00097984	0.00144061	0.998851	1	no
13102.m05807	LOC_Os02g51110.1	=	aquaporin protein, putative, expressed	chr02:31260375-31264091	LOWDATA	36.522	6.4793	-2.49485	0	1	1	no	LOWDATA	11.7982	3.81681	-1.62812	0	1	1	no	OK	50.4456	8.93367	-2.4974	4.76594	1.87974e-06	0.00019568	yes	LOWDATA	20.1628	34.1262	0.759185	0	1	1	no
13102.m05908	LOC_Os02g51890.1	=	RNA recognition motif containing protein, putative, expressed	chr02:31767567-31809643	LOWDATA	3.26358	5.63497	0.787953	0	1	1	no	NOTEST	2.06917	1.80762	-0.194962	0.128496	0.897757	1	no	OK	2.99063	4.01308	0.42426	-0.390052	0.696498	1	no	OK	4.05447	5.85051	0.52905	-0.574571	0.565582	1	no
13102.m05944	LOC_Os02g52150.1	=	heat shock 22 kDa protein, mitochondrial precursor, putative, expressed	chr02:31910237-31916843	LOWDATA	0.326205	0.390079	0.257991	0	1	1	no	NOTEST	0	0	0	0	1	1	no	LOWDATA	0.163746	0.290443	0.826792	0	1	1	no	NOTEST	0	0	0	0	1	1	no
13102.m06036	LOC_Os02g52940.3	=	soluble inorganic pyrophosphatase, putative, expressed	chr02:32369000-32375781	LOWDATA	0.348639	0.352387	0.0154271	0	1	1	no	LOWDATA	0.268816	0.483913	0.84813	0	1	1	no	LOWDATA	1.10282	0.376563	-1.55024	0	1	1	no	LOWDATA	0.66998	0.607134	-0.142104	0	1	1	no
13102.m06101	LOC_Os02g53400.1	=	thioredoxin, putative, expressed	chr02:32664798-32698538	LOWDATA	4.56302	15.509	1.76505	0	1	1	no	OK	5.33492	6.36573	0.254861	-0.125431	0.900182	0.982505	no	OK	4.4803	14.1242	1.6565	-0.703789	0.481564	0.974432	no	OK	6.65279	11.5279	0.793097	-0.471276	0.637444	1	no
13102.m06211	LOC_Os02g54240.1	=	OsFBX62 - F-box domain containing protein	chr02:33243650-33260734	LOWDATA	0.713192	8.30934	3.54237	0	1	1	no	OK	0.255591	4.02621	3.97751	-1.18689	0.235272	0.565363	no	OK	0.25729	6.22185	4.59587	-1.49589	0.134683	0.620926	no	OK	0.145727	4.0476	4.79572	-0.876424	0.3808	1	no
13102.m06322	LOC_Os02g55160.1	=	expressed protein	chr02:33779672-33789303	LOWDATA	0.895176	1.73028	0.950759	0	1	1	no	LOWDATA	0.765095	0.650119	-0.234936	0	1	1	no	LOWDATA	0.349526	0.510711	0.547107	0	1	1	no	LOWDATA	0.379378	1.0762	1.50424	0	1	1	no
13102.m06373	LOC_Os02g55560.2	=	protein phosphatase 2C, putative, expressed	chr02:34020403-34024433	LOWDATA	0.659307	1.10347	0.743027	0	1	1	no	NOTEST	0.576179	0	0	0	1	1	no	LOWDATA	0.179379	0.531856	1.56803	0	1	1	no	LOWDATA	0.266868	0.208511	-0.356001	0	1	1	no
13102.m06409	LOC_Os02g55840.1	=	expressed protein	chr02:34176215-34178771	LOWDATA	0.904904	0.239219	-1.91943	0	1	1	no	NOTEST	1.06697	0	-1e+300	-1e+300	0.00329366	1	no	OK	0	0	0	0	1	1	no	NOTEST	0	0	0	0	1	1	no
13102.m06407	LOC_Os02g55840.4	=	expressed protein	chr02:34176215-34178771	LOWDATA	7.07105	9.0387	0.354191	0	1	1	no	NOTEST	2.76106	0	-1e+300	-1e+300	0.000706533	1	no	NOTEST	0	0	0	0	1	1	no	OK	4.14598	1.34815	-1.62073	0.638183	0.523354	1	no
13102.m06445	LOC_Os02g56120.2	=	OsIAA9 - Auxin-responsive Aux/IAA gene family member, expressed	chr02:34342712-34382312	LOWDATA	0.930388	1.43544	0.625589	0	1	1	no	NOTEST	0	0	0	0	1	1	no	LOWDATA	1.13965	3.09784	1.44267	0	1	1	no	LOWDATA	0.484538	3.8194	2.97866	0	1	1	no
13102.m06459	LOC_Os02g56219.1	=	acetyltransferase, GNAT family, putative, expressed	chr02:34342712-34382312	LOWDATA	2.73726	1.02563	-1.41622	0	1	1	no	OK	4.85578	3.28095	-0.565592	0.0919516	0.926736	0.991681	no	NOTEST	0.691903	1.55054	1.16413	-0.311266	0.755598	1	no	LOWDATA	3.78411	1.51688	-1.31885	0	1	1	no
13102.m06476	LOC_Os02g56360.3	=	expressed protein	chr02:34494402-34498687	LOWDATA	0.170149	0.173588	0.0288698	0	1	1	no	LOWDATA	0.369819	0.115234	-1.68225	0	1	1	no	LOWDATA	0.131819	0.134631	0.0304526	0	1	1	no	NOTEST	0.0917401	0.364898	1.99187	-0.107175	0.91465	1	no
13102.m06546	LOC_Os02g56940.4	=	expressed protein	chr02:34895745-34909617	LOWDATA	0.402277	0.264318	-0.605914	0	1	1	no	OK	3.879	2.20129	-0.817338	0.490717	0.623627	0.855687	no	NOTEST	0.263761	0	0	0	1	1	no	NOTEST	1.98342	0	-1e+300	-1e+300	0.0682351	1	no
13102.m06677	LOC_Os02g57750.2	=	protein binding protein, putative, expressed	chr02:35356871-35363032	LOWDATA	0.113386	0.652394	2.5245	0	1	1	no	LOWDATA	0.15687	0.306739	0.967438	0	1	1	no	LOWDATA	0.255126	0.156143	-0.708345	0	1	1	no	NOTEST	0	0	0	0	1	1	no
13102.m06692	LOC_Os02g57854.1	=	vacuolar ATP synthase subunit F, putative, expressed	chr02:35420016-35508380	LOWDATA	17.5272	19.012	0.117314	0	1	1	no	OK	21.7306	7.80654	-1.47697	1.76198	0.0780719	0.330286	no	OK	16.7985	22.8025	0.440862	-0.618467	0.536268	0.997718	no	LOWDATA	16.946	23.4841	0.470739	0	1	1	no
13102.m06712	LOC_Os02g57990.1	=	methionine adenosyltransferase regulatory beta subunit-related, putative, expressed	chr02:35420016-35508380	LOWDATA	0.588208	0.189568	-1.63361	0	1	1	no	NOTEST	0.255924	0	0	0	1	1	no	NOTEST	1.4068	1.03471	-0.44318	0.157484	0.874864	1	no	LOWDATA	3.48242	0.835391	-2.05957	0	1	1	no
13102.m06709	LOC_Os02g57990.2	=	methionine adenosyltransferase regulatory beta subunit-related, putative, expressed	chr02:35420016-35508380	LOWDATA	2.26954	1.3984	-0.698621	0	1	1	no	NOTEST	1.48248	0	0	0	1	1	no	NOTEST	0	0	0	0	1	1	no	NOTEST	0.500455	0	0	0	1	1	no
13102.m06710	LOC_Os02g57990.3	=	methionine adenosyltransferase regulatory beta subunit-related, putative, expressed	chr02:35420016-35508380	LOWDATA	1.02462	0.482227	-1.08731	0	1	1	no	NOTEST	1.87503	3.33009	0.828647	-0.265275	0.790798	1	no	LOWDATA	0.979933	1.30241	0.410426	0	1	1	no	LOWDATA	1.58587	3.99663	1.33351	0	1	1	no
13102.m06736	LOC_Os02g58170.1	=	transposon protein, putative, unclassified	chr02:35566199-35597741	LOWDATA	0.916476	0.644524	-0.507863	0	1	1	no	LOWDATA	0.540286	0.207748	-1.37889	0	1	1	no	LOWDATA	0.449092	0.555829	0.307629	0	1	1	no	LOWDATA	0.474372	0.213879	-1.14923	0	1	1	no
13102.m00001	LOC_Os02g01010.1	=	OsPDIL1-4 protein disulfide isomerase PDIL1-4, expressed	chr02:3513-27108	LOWDATA	15.3868	16.0861	0.0641195	0	1	1	no	OK	9.3495	7.52956	-0.312324	0.504211	0.614113	0.850477	no	OK	14.0071	13.4253	-0.0612142	0.0742531	0.940809	1	no	OK	16.4703	21.5156	0.385519	-0.550547	0.581945	1	no
13102.m00002	LOC_Os02g01020.1	=	expressed protein	chr02:3513-27108	LOWDATA	3.53939	6.33666	0.840223	0	1	1	no	OK	5.90189	4.02011	-0.553941	0.64967	0.515906	0.788822	no	OK	5.27124	7.86293	0.576926	-0.594909	0.551904	1	no	OK	7.32035	8.78324	0.262841	-0.337198	0.735968	1	no
13102.m00003	LOC_Os02g01020.2	=	expressed protein	chr02:3513-27108	LOWDATA	1.28777	0.495452	-1.37806	0	1	1	no	NOTEST	1.34196	0.333002	-2.01074	0.622498	0.533614	1	no	NOTEST	0.175937	0.180616	0.0378661	-0.0122841	0.990199	1	no	NOTEST	0.287043	0.19302	-0.572518	0.123475	0.901731	1	no
13102.m00014	LOC_Os02g01100.2	=	transmembrane amino acid transporter protein, putative, expressed	chr02:44706-83042	LOWDATA	7.72832	8.99886	0.219587	0	1	1	no	LOWDATA	8.37013	9.40493	0.168168	0	1	1	no	LOWDATA	10.6284	10.5115	-0.0159505	0	1	1	no	OK	10.966	15.4235	0.492086	-0.600345	0.548276	1	no
13102.m00021	LOC_Os02g01150.2	=	erythronate-4-phosphate dehydrogenase domain containing protein, expressed	chr02:44706-83042	LOWDATA	33.6088	34.0126	0.0172307	0	1	1	no	OK	61.0499	46.6138	-0.389232	0.884554	0.376397	0.692713	no	OK	35.5798	27.3407	-0.380006	0.982916	0.325649	0.878954	no	OK	44.2096	55.6556	0.332166	-0.658487	0.510226	1	no
13102.m00045	LOC_Os02g01290.1	=	expressed protein	chr02:158649-164372	LOWDATA	0.196848	0.49741	1.33735	0	1	1	no	NOTEST	0.15085	0.213068	0.498204	-0.492196	0.622581	1	no	LOWDATA	0.101949	0.558883	2.45469	0	1	1	no	LOWDATA	0.0856463	0.142339	0.732869	0	1	1	no
13102.m00076	LOC_Os02g01550.1	=	OsFBL6 - F-box domain and LRR containing protein, expressed	chr02:299743-319129	LOWDATA	1.06833	0.464688	-1.20103	0	1	1	no	NOTEST	0	0	0	0	1	1	no	LOWDATA	0.530942	0.59803	0.171665	0	1	1	no	LOWDATA	0.939415	0.81045	-0.21304	0	1	1	no
13102.m00092	LOC_Os02g01700.1	=	RNA recognition motif containing protein, putative	chr02:385737-387092	LOWDATA	0.883911	0.384483	-1.20098	0	1	1	no	LOWDATA	0.818024	2.17739	1.41239	0	1	1	no	LOWDATA	0.909364	0.284311	-1.67739	0	1	1	no	LOWDATA	0.668223	1.8392	1.46068	0	1	1	no
13102.m00100	LOC_Os02g01750.1	=	conserved hypothetical protein	chr02:410422-488077	LOWDATA	0.0385019	0.381948	3.31037	0	1	1	no	NOTEST	0.11194	0.307716	1.45888	-0.522207	0.601526	1	no	LOWDATA	0.218715	0.105579	-1.05073	0	1	1	no	NOTEST	0	0.245998	1e+300	1e+300	0.0368191	1	no
13102.m00102	LOC_Os02g01765.1	=	expressed protein	chr02:410422-488077	LOWDATA	3.65555	5.6765	0.634914	0	1	1	no	NOTEST	0	0	0	0	1	1	no	LOWDATA	0.980895	2.69851	1.45999	0	1	1	no	NOTEST	0.0437545	0	0	0	1	1	no
13102.m00103	LOC_Os02g01770.1	=	hypothetical protein	chr02:410422-488077	LOWDATA	3.95911	3.27294	-0.274589	0	1	1	no	OK	2.1316	3.87553	0.862455	-0.760427	0.446999	0.744774	no	LOWDATA	4.48667	2.88777	-0.63569	0	1	1	no	NOTEST	2.53584	2.81657	0.151476	-0.124884	0.900615	1	no
13102.m00106	LOC_Os02g01790.2	=	expressed protein	chr02:410422-488077	LOWDATA	4.85175	4.45533	-0.122971	0	1	1	no	LOWDATA	4.08615	4.11688	0.0108116	0	1	1	no	LOWDATA	3.25667	2.84626	-0.194331	0	1	1	no	OK	3.51861	2.55215	-0.463292	0.139882	0.888753	1	no
13102.m00108	LOC_Os02g01810.1	=	expressed protein	chr02:410422-488077	LOWDATA	0.121176	0.0751311	-0.689626	0	1	1	no	NOTEST	0	0	0	0	1	1	no	NOTEST	0.0645419	0.0553883	-0.220653	0.0376595	0.969959	1	no	LOWDATA	0.0402201	0.338768	3.07431	0	1	1	no
13102.m00109	LOC_Os02g01820.1	=	ABC2 homolog 4, putative	chr02:410422-488077	LOWDATA	0.155511	0.0642795	-1.27459	0	1	1	no	NOTEST	0.0188388	0.0414263	1.13684	-0.148549	0.88191	1	no	LOWDATA	0.0920142	0.130291	0.501813	0	1	1	no	NOTEST	0	0.0206985	1e+300	1e+300	0.308538	1	no
13102.m00110	LOC_Os02g01825.1	=	retrotransposon protein, putative, unclassified	chr02:410422-488077	LOWDATA	0.173301	0.230248	0.40991	0	1	1	no	LOWDATA	0.161952	0.138485	-0.225842	0	1	1	no	LOWDATA	0.0351537	0.226261	2.68624	0	1	1	no	NOTEST	0.0657195	0.257003	1.96739	-0.347572	0.728161	1	no
13102.m00111	LOC_Os02g01830.1	=	expressed protein	chr02:410422-488077	LOWDATA	0.416086	1.36361	1.71247	0	1	1	no	LOWDATA	0.489649	0.517236	0.0790749	0	1	1	no	LOWDATA	0.187569	0.621737	1.72888	0	1	1	no	NOTEST	0.460239	0.18987	-1.27737	0.572121	0.56724	1	no
13102.m00178	LOC_Os02g02400.2	=	catalase isozyme A, putative, expressed	chr02:824849-827644	LOWDATA	1.30091	0.584159	-1.15509	0	1	1	no	NOTEST	2.41047	0	0	0	1	1	no	LOWDATA	0.753391	0.580575	-0.375917	0	1	1	no	LOWDATA	1.25132	1.12106	-0.158582	0	1	1	no
13102.m00236	LOC_Os02g02810.1	=	expressed protein	chr02:1047102-1072116	LOWDATA	0.0792303	0.408544	2.36637	0	1	1	no	NOTEST	0.414511	0.0745615	-2.47491	1.55659	0.119568	1	no	NOTEST	0.17224	0.485328	1.49454	-0.16351	0.870117	1	no	NOTEST	0.386677	0.488464	0.337124	-0.0226281	0.981947	1	no
13102.m00263	LOC_Os02g02980.2	=	MATE domain containing protein, expressed	chr02:1166106-1173728	LOWDATA	0.286991	0.658872	1.19899	0	1	1	no	NOTEST	0.076482	0	0	0	1	1	no	LOWDATA	0.0548932	0.197615	1.848	0	1	1	no	NOTEST	0.0532224	0	0	0	1	1	no
13102.m00298	LOC_Os02g03200.1	=	FAD-binding and arabino-lactone oxidase domains containing protein, putative, expressed	chr02:1263499-1288205	LOWDATA	0.570143	0.379516	-0.587163	0	1	1	no	LOWDATA	0.636793	0.209327	-1.60507	0	1	1	no	NOTEST	0.484202	0.428407	-0.176628	0.0218081	0.982601	1	no	LOWDATA	0.433541	0.521004	0.265127	0	1	1	no
13102.m00366	LOC_Os02g03730.1	=	SWIB/MDM2 domain containing protein, expressed	chr02:1560628-1579232	LOWDATA	11.846	7.54824	-0.650193	0	1	1	no	OK	7.66773	8.71804	0.185206	-0.0697837	0.944366	0.997853	no	OK	18.1891	14.8533	-0.292288	0.254102	0.799417	1	no	OK	18.8141	17.8523	-0.0757007	0.0778238	0.937968	1	no
13102.m00447	LOC_Os02g04340.1	=	NIN-like protein 2, putative, expressed	chr02:1913229-1916343	LOWDATA	0.107799	0.273019	1.34066	0	1	1	no	NOTEST	0.0798938	0	0	0	1	1	no	NOTEST	0	0	0	0	1	1	no	NOTEST	0	0	0	0	1	1	no
13102.m00528	LOC_Os02g04950.1	=	splicing factor 3B subunit 1, putative, expressed	chr02:2318088-2551238	LOWDATA	1.37714	1.79164	0.379612	0	1	1	no	NOTEST	0	0	0	0	1	1	no	LOWDATA	1.28515	1.94711	0.599391	0	1	1	no	NOTEST	2.41081	0	-1e+300	-1e+300	0.278238	1	no
13102.m00538	LOC_Os02g05060.1	=	OsSAUR5 - Auxin-responsive SAUR gene family member	chr02:2318088-2551238	LOWDATA	0.787932	0.0465266	-4.08194	0	1	1	no	NOTEST	0	0	0	0	1	1	no	LOWDATA	0.55949	0.205775	-1.44305	0	1	1	no	NOTEST	0.19923	0	-1e+300	-1e+300	0.0368191	1	no
13102.m00565	LOC_Os02g05260.1	=	retrotransposon protein, putative, unclassified	chr02:2318088-2551238	LOWDATA	0.00465881	0.0179731	1.9478	0	1	1	no	NOTEST	0	0	0	0	1	1	no	NOTEST	0	0	0	0	1	1	no	NOTEST	0	0	0	0	1	1	no
13102.m00569	LOC_Os02g05300.1	=	hypothetical protein	chr02:2318088-2551238	LOWDATA	0.0530633	0.0329	-0.689626	0	1	1	no	NOTEST	0	0	0	0	1	1	no	NOTEST	0	0	0	0	1	1	no	NOTEST	0.0352178	0	-1e+300	-1e+300	0.158655	1	no
13102.m00650	LOC_Os02g05890.1	=	EMB1303, putative, expressed	chr02:2904283-2932225	LOWDATA	10.9146	7.53305	-0.534959	0	1	1	no	LOWDATA	21.3164	12.7695	-0.739262	0	1	1	no	LOWDATA	12.5362	6.42818	-0.963623	0	1	1	no	LOWDATA	7.29601	3.8826	-0.910087	0	1	1	no
13102.m00659	LOC_Os02g05980.1	=	phytosulfokine receptor precursor, putative, expressed	chr02:2958766-2984675	LOWDATA	0	0	-1e+300	0	1	1	no	NOTEST	2.63149	1.18857	-1.14665	1.81798	0.069067	1	no	NOTEST	0	0	0	0	1	1	no	NOTEST	1.18615	0	-1e+300	-1e+300	0.012816	1	no
13102.m00682	LOC_Os02g06205.1	=	phytosulfokine receptor precursor, putative, expressed	chr02:3102226-3111444	LOWDATA	0.132502	0.241072	0.863453	0	1	1	no	NOTEST	0	0	0	0	1	1	no	LOWDATA	0.167324	0.110565	-0.597745	0	1	1	no	LOWDATA	0	0	0	0	1	1	no
13102.m00683	LOC_Os02g06210.1	=	phytosulfokine receptor precursor, putative, expressed	chr02:3102226-3111444	LOWDATA	0.819095	0.494377	-0.728419	0	1	1	no	NOTEST	0	0	0	0	1	1	no	LOWDATA	0.264659	0.589987	1.15655	0	1	1	no	LOWDATA	0	0	0	0	1	1	no
13102.m00714	LOC_Os02g06480.2	=	SCO1 protein homolog, mitochondrial precursor, putative, expressed	chr02:3212370-3249839	LOWDATA	0.343094	2.27396	2.72853	0	1	1	no	NOTEST	0	0	0	0	1	1	no	LOWDATA	0.0157758	0.490272	4.9578	0	1	1	no	NOTEST	1.22876	0	0	0	1	1	no
13102.m00929	LOC_Os02g08080.1	=	expressed protein	chr02:4260390-4268842	LOWDATA	0.00415784	0.0188141	2.17791	0	1	1	no	NOTEST	0	0	0	0	1	1	no	NOTEST	0.087359	0.245391	1.49005	-1.26627	0.205417	1	no	NOTEST	0.148736	0.173778	0.224492	-0.187897	0.850957	1	no
13102.m00962	LOC_Os02g08350.1	=	expressed protein	chr02:4432867-4438653	LOWDATA	6.62554	12.3603	0.899608	0	1	1	no	OK	8.5058	6.05262	-0.490886	0.880061	0.378826	0.694662	no	LOWDATA	5.63697	10.9571	0.95888	0	1	1	no	LOWDATA	7.53402	11.8989	0.659342	0	1	1	no
13102.m01066	LOC_Os02g09720.1	=	multidrug resistance protein, putative, expressed	chr02:4966916-4998243	LOWDATA	0.299797	0.71435	1.25265	0	1	1	no	NOTEST	1.19901	0.693663	-0.789538	0.273858	0.784194	1	no	LOWDATA	0.177828	0.788549	2.14872	0	1	1	no	LOWDATA	0.488873	0	-1e+300	0	1	1	no
13102.m01080	LOC_Os02g09810.3	=	amino acid transporter, putative, expressed	chr02:5048652-5075533	LOWDATA	0.711639	6.81603	3.25971	0	1	1	no	NOTEST	0	0	0	0	1	1	no	LOWDATA	2.33936	6.1829	1.40217	0	1	1	no	NOTEST	0	0	0	0	1	1	no
13102.m01145	LOC_Os02g10310.3	=	fumarylacetoacetase, putative, expressed	chr02:5404581-5426291	LOWDATA	11.3709	26.7537	1.2344	0	1	1	no	OK	19.1318	12.0836	-0.662924	0.956865	0.338636	0.661997	no	OK	15.1982	31.2326	1.03915	-1.2984	0.194149	0.729812	no	OK	27.0142	33.0571	0.291242	-0.466651	0.64075	1	no
13102.m01144	LOC_Os02g10310.1	=	fumarylacetoacetase, putative, expressed	chr02:5404581-5426291	LOWDATA	8.00123	17.5635	1.13429	0	1	1	no	OK	9.2972	21.5386	1.21206	-1.53597	0.124546	0.41949	no	OK	7.36562	12.7842	0.795483	-0.630619	0.52829	0.994052	no	OK	10.7744	19.314	0.842036	-0.968809	0.33264	1	no
13102.m01172	LOC_Os02g10500.1	=	expressed protein	chr02:5511142-5528782	LOWDATA	13.8224	14.7103	0.0898228	0	1	1	no	OK	12.9337	17.3552	0.424233	-0.778748	0.436128	0.737679	no	OK	12.6364	12.926	0.0326882	-0.0466704	0.962776	1	no	OK	13.0774	15.8201	0.274689	-0.471403	0.637353	1	no
13102.m01215	LOC_Os02g10850.1	=	OsFBK3 - F-box domain and kelch repeat containing protein, expressed	chr02:5755129-5758098	LOWDATA	2.00206	2.37388	0.245765	0	1	1	no	NOTEST	1.90193	3.3503	0.816829	-1.27274	0.203111	1	no	OK	2.2722	1.73069	-0.392737	0.355883	0.721928	1	no	OK	3.87931	4.57269	0.237244	-0.273727	0.784294	1	no
13102.m01225	LOC_Os02g10920.1	=	zinc finger family protein, putative, expressed	chr02:5798885-5806504	LOWDATA	1.46839	0.692198	-1.08498	0	1	1	no	NOTEST	3.08891	0.0426906	-6.17704	0.0751908	0.940063	1	no	OK	8.44642	2.61187	-1.69325	0.676069	0.498997	0.983815	no	OK	13.6034	1.00244	-3.76237	0.546659	0.584613	1	no
13102.m12372	LOC_Os02g10920.6	=	zinc finger family protein, putative, expressed	chr02:5798885-5806504	LOWDATA	0.264524	0.730621	1.46572	0	1	1	no	LOWDATA	0.217238	0.914809	2.07419	0	1	1	no	LOWDATA	1.84195	0.215952	-3.09245	0	1	1	no	OK	3.36717	1.56084	-1.10922	0.352572	0.72441	1	no
13102.m01281	LOC_Os02g11830.2	=	coatomer subunit beta, putative, expressed	chr02:6110017-6141327	LOWDATA	8.30685	6.58329	-0.335494	0	1	1	no	OK	6.7304	3.31095	-1.02345	1.04702	0.295092	0.624763	no	OK	4.10338	4.15326	0.0174325	-0.0101621	0.991892	1	no	OK	3.71729	3.53514	-0.0724823	0.0249812	0.98007	1	no
13102.m01300	LOC_Os02g11990.1	=	hypothetical protein	chr02:6215997-6256373	LOWDATA	0.141624	0.94984	2.74562	0	1	1	no	NOTEST	0	0	0	0	1	1	no	NOTEST	0	0	0	0	1	1	no	NOTEST	0	0	0	0	1	1	no
13102.m01302	LOC_Os02g12010.1	=	receptor-like protein kinase precursor, putative	chr02:6215997-6256373	LOWDATA	0.800919	2.01259	1.32933	0	1	1	no	LOWDATA	0.692952	0.226633	-1.6124	0	1	1	no	NOTEST	0.073619	1.97172	4.74323	-0.85824	0.39076	1	no	NOTEST	0.0723014	1.01424	3.81023	-2.97516	0.00292835	1	no
13102.m01303	LOC_Os02g12020.1	=	hypothetical protein	chr02:6215997-6256373	LOWDATA	1.50478	1.86597	0.310374	0	1	1	no	NOTEST	0.312498	0.343963	0.138407	-0.0678374	0.945915	1	no	NOTEST	0.458396	0.393385	-0.220653	0.139943	0.888705	1	no	NOTEST	0.285655	1.37488	2.26695	-1.19558	0.23186	1	no
13102.m01305	LOC_Os02g12040.1	=	receptor-like protein kinase precursor, putative	chr02:6215997-6256373	LOWDATA	0.124005	0.277425	1.1617	0	1	1	no	NOTEST	0.0468244	0	-1e+300	-1e+300	0.0749393	1	no	NOTEST	0.0489022	0.117608	1.26602	-1.22531	0.22046	1	no	NOTEST	0.0331631	0.0850283	1.35836	-1.03438	0.300961	1	no
13102.m01377	LOC_Os02g12610.1	=	hsp20/alpha crystallin family protein, putative, expressed	chr02:6582268-6588288	LOWDATA	0.0904634	0.064667	-0.484304	0	1	1	no	NOTEST	0.0598349	0.0329054	-0.862665	0.141522	0.887458	1	no	LOWDATA	0.0982144	0.315042	1.68154	0	1	1	no	LOWDATA	0.433217	0.365797	-0.24405	0	1	1	no
13102.m01460	LOC_Os02g13160.1	=	F-box protein PP2-A15, putative, expressed	chr02:7012533-7024341	LOWDATA	1.21343	0.774249	-0.648224	0	1	1	no	LOWDATA	2.32549	0.398455	-2.54505	0	1	1	no	LOWDATA	0.485049	0.941708	0.957149	0	1	1	no	NOTEST	1.05883	0	0	0	1	1	no
13102.m01463	LOC_Os02g13190.1	=	F-box family protein, putative, expressed	chr02:7026616-7064454	LOWDATA	2.21723	0.879219	-1.33447	0	1	1	no	OK	4.61997	4.00208	-0.207134	0.237349	0.812386	0.948884	no	OK	4.34869	1.41998	-1.61471	0.842887	0.399292	0.933352	no	OK	3.73953	2.23596	-0.741964	0.556147	0.57811	1	no
13102.m01483	LOC_Os02g13370.1	=	expressed protein	chr02:7126753-7133872	LOWDATA	0.472876	0.781232	0.724287	0	1	1	no	NOTEST	0.523022	0	0	0	1	1	no	NOTEST	0.9399	1.9976	1.08769	-0.372935	0.709197	1	no	NOTEST	0.39146	1.22715	1.64838	-0.667239	0.504619	1	no
13102.m01626	LOC_Os02g14630.1	=	hydroquinone glucosyltransferase, putative, expressed	chr02:8075859-8185017	LOWDATA	1.22304	2.18181	0.835057	0	1	1	no	NOTEST	0.642663	0.355848	-0.8528	0.454003	0.649827	1	no	LOWDATA	1.73338	1.97936	0.191447	0	1	1	no	LOWDATA	0.711759	1.84386	1.37327	0	1	1	no
13102.m01631	LOC_Os02g14680.1	=	UDP-glucoronosyl and UDP-glucosyl transferase domain containing protein, expressed	chr02:8075859-8185017	LOWDATA	0.881821	0.528388	-0.738887	0	1	1	no	NOTEST	1.7845	3.12954	0.81043	-0.0658698	0.947482	1	no	LOWDATA	1.41985	2.07197	0.545267	0	1	1	no	LOWDATA	1.87349	1.77417	-0.078589	0	1	1	no
13102.m01641	LOC_Os02g14770.1	=	phosphoenolpyruvate carboxylase, putative, expressed	chr02:8075859-8185017	LOWDATA	13.4826	18.7844	0.478434	0	1	1	no	OK	18.8561	11.7894	-0.677537	1.03345	0.301392	0.630246	no	LOWDATA	12.682	17.2625	0.44486	0	1	1	no	LOWDATA	14.4032	23.9105	0.731252	0	1	1	no
13102.m12380	LOC_Os02g14770.4	=	phosphoenolpyruvate carboxylase, putative, expressed	chr02:8075859-8185017	LOWDATA	7.75992	10.5695	0.445799	0	1	1	no	LOWDATA	5.46971	6.90002	0.335137	0	1	1	no	LOWDATA	8.92246	12.2917	0.462172	0	1	1	no	LOWDATA	8.60611	10.6314	0.304904	0	1	1	no
13102.m02113	LOC_Os02g18850.1	=	OsPOP5 - Putative Prolyl Oligopeptidase homologue, expressed	chr02:10994199-11060361	LOWDATA	7.26844	9.7051	0.417098	0	1	1	no	OK	9.58869	7.73157	-0.310572	0.507007	0.61215	0.848873	no	LOWDATA	6.75069	7.93242	0.232727	0	1	1	no	OK	8.48468	11.6066	0.452017	-0.688969	0.490843	1	no
13102.m02287	LOC_Os02g20420.1	=	retrotransposon protein, putative, LINE subclass	chr02:12039378-12057714	LOWDATA	0.0959477	0.104081	0.11739	0	1	1	no	NOTEST	0.197202	0.0473802	-2.05732	0.299674	0.764426	1	no	LOWDATA	0.0318649	0.0240093	-0.408376	0	1	1	no	LOWDATA	0.0485198	0.047469	-0.0315865	0	1	1	no
13102.m02352	LOC_Os02g20980.2	=	expressed protein	chr02:12397899-12421859	LOWDATA	0.633288	0.219796	-1.52669	0	1	1	no	LOWDATA	0.617956	0.154687	-1.99815	0	1	1	no	LOWDATA	0.0775532	1.47041	4.24489	0	1	1	no	LOWDATA	0.298321	0.511854	0.778865	0	1	1	no
13102.m02515	LOC_Os02g22374.5	=	expressed protein	chr02:13360934-13364377	LOWDATA	0.22325	0.177089	-0.334186	0	1	1	no	NOTEST	0.510971	0	0	0	1	1	no	LOWDATA	0.474418	0.768438	0.695772	0	1	1	no	LOWDATA	0.757726	0.267148	-1.50404	0	1	1	no
13102.m02610	LOC_Os02g24095.1	=	expressed protein	chr02:13956194-13960737	LOWDATA	0.298767	0.617077	1.04643	0	1	1	no	LOWDATA	0.344514	0.188664	-0.868741	0	1	1	no	NOTEST	0.818824	0.307343	-1.4137	1.06489	0.286927	1	no	NOTEST	0.185671	0	0	0	1	1	no
13102.m02615	LOC_Os02g24134.4	=	Sec1 family transport protein, putative, expressed	chr02:13971738-13981560	LOWDATA	0.342731	0.118567	-1.53137	0	1	1	no	NOTEST	0.272227	0	0	0	1	1	no	NOTEST	0	0	0	0	1	1	no	NOTEST	0	0	0	0	1	1	no
13102.m02713	LOC_Os02g25060.2	=	NTMC2Type1.2 protein, putative, expressed	chr02:14523791-14531678	LOWDATA	0.857094	0.346294	-1.30746	0	1	1	no	LOWDATA	1.22917	0.521236	-1.23768	0	1	1	no	LOWDATA	0.543754	0.550141	0.0168476	0	1	1	no	LOWDATA	1.00721	0.286211	-1.81522	0	1	1	no
13102.m02766	LOC_Os02g25580.2	=	Sec1 family transport protein, putative, expressed	chr02:14936662-14956221	LOWDATA	0.958365	0.448691	-1.09485	0	1	1	no	NOTEST	1.01664	0	0	0	1	1	no	NOTEST	0	0	0	0	1	1	no	NOTEST	0	0	0	0	1	1	no
13102.m02779	LOC_Os02g25680.1	=	expressed protein	chr02:15023588-15028692	LOWDATA	0	0	-1e+300	0	1	1	no	NOTEST	0.098905	0	0	0	1	1	no	NOTEST	0	0.1089	1e+300	1e+300	0.0227501	1	no	NOTEST	0	0	0	0	1	1	no
13102.m02844	LOC_Os02g26294.4	=	expressed protein	chr02:15435304-15440338	LOWDATA	0.0560694	0.120114	1.09911	0	1	1	no	NOTEST	0	0.0482634	1e+300	1e+300	0.113478	1	no	LOWDATA	0.0704903	0.0634115	-0.152679	0	1	1	no	NOTEST	0.0686116	0	-1e+300	-1e+300	0.0456373	1	no
13102.m03012	LOC_Os02g27620.2	=	endonuclease/exonuclease/phosphatase family domain containing protein, expressed	chr02:16354211-16361212	LOWDATA	0.129133	0.186378	0.529375	0	1	1	no	LOWDATA	0.299691	0.0772909	-1.95511	0	1	1	no	LOWDATA	0.164234	0.0938501	-0.807319	0	1	1	no	NOTEST	0	0	0	0	1	1	no
13102.m03101	LOC_Os02g28460.1	=	conserved hypothetical protein	chr02:16824374-16830649	LOWDATA	0.242212	0.566154	1.22492	0	1	1	no	LOWDATA	0.460503	0.335788	-0.455661	0	1	1	no	NOTEST	0.0304657	0	0	0	1	1	no	NOTEST	0	0	0	0	1	1	no
13102.m03173	LOC_Os02g29140.1	=	ankyrin, putative, expressed	chr02:17252062-17284438	LOWDATA	0.298379	0.178309	-0.742769	0	1	1	no	NOTEST	0.0865861	0	-1e+300	-1e+300	0.0227501	1	no	LOWDATA	0.149261	0.284767	0.931945	0	1	1	no	NOTEST	0	0	0	0	1	1	no
13102.m03175	LOC_Os02g29150.1	=	OsFBO11 - F-box and other domain containing protein, expressed	chr02:17252062-17284438	LOWDATA	0.211842	0.316689	0.580077	0	1	1	no	NOTEST	0.180558	0	0	0	1	1	no	LOWDATA	0.0996396	0.220555	1.14635	0	1	1	no	NOTEST	0	0	0	0	1	1	no
13102.m03176	LOC_Os02g29160.1	=	ankyrin, putative, expressed	chr02:17252062-17284438	LOWDATA	0.195505	0.172084	-0.18409	0	1	1	no	NOTEST	0	0	0	0	1	1	no	NOTEST	0	0	0	0	1	1	no	NOTEST	0	0	0	0	1	1	no
13102.m03513	LOC_Os02g32504.2	=	heparan-alpha-glucosaminide N-acetyltransferase, putative, expressed	chr02:19204817-19229764	LOWDATA	0.201355	0.316912	0.654341	0	1	1	no	LOWDATA	0.460383	0.119006	-1.95179	0	1	1	no	LOWDATA	0.365168	0.258953	-0.495872	0	1	1	no	NOTEST	0	0	0	0	1	1	no
13102.m03518	LOC_Os02g32530.2	=	SAM domain family protein, expressed	chr02:19245290-19257423	LOWDATA	3.62161	3.61574	-0.00234039	0	1	1	no	NOTEST	2.20746	2.08155	-0.08473	0.0593288	0.95269	1	no	NOTEST	0.309073	1.866	2.59393	-0.640535	0.521825	1	no	NOTEST	0.43729	1.67018	1.93334	-0.133841	0.893528	1	no
13102.m03519	LOC_Os02g32530.1	=	SAM domain family protein, expressed	chr02:19245290-19257423	LOWDATA	0.817067	0.663146	-0.301127	0	1	1	no	LOWDATA	0.601598	1.28215	1.09169	0	1	1	no	LOWDATA	1.68687	2.03139	0.268126	0	1	1	no	LOWDATA	0.734464	0.800476	0.124168	0	1	1	no
13102.m03537	LOC_Os02g32650.2	=	expressed protein	chr02:19346707-19349026	LOWDATA	0.107157	0.0931489	-0.202119	0	1	1	no	LOWDATA	0.197158	0.0761977	-1.37153	0	1	1	no	LOWDATA	0.0968459	0.0697897	-0.472676	0	1	1	no	LOWDATA	0.0637771	0.12243	0.940847	0	1	1	no
13102.m03539	LOC_Os02g32660.2	=	1,4-alpha-glucan-branching enzyme, chloroplast precursor, putative, expressed	chr02:19349879-19361796	LOWDATA	0.150652	0.227062	0.591863	0	1	1	no	LOWDATA	0.528647	0.322397	-0.713466	0	1	1	no	NOTEST	0	0	0	0	1	1	no	NOTEST	0	0	0	0	1	1	no
13102.m03555	LOC_Os02g32814.1	=	heavy metal-associated domain containing protein, expressed	chr02:19466299-19480380	LOWDATA	0.495251	0.755294	0.608879	0	1	1	no	LOWDATA	0.291269	0.323419	0.151051	0	1	1	no	LOWDATA	0.485736	0.647292	0.414243	0	1	1	no	LOWDATA	0.135079	0.46785	1.79224	0	1	1	no
13102.m03744	LOC_Os02g34560.2	=	plant neutral invertase domain containing protein, expressed	chr02:20712018-20716052	LOWDATA	0.905405	0.832698	-0.120769	0	1	1	no	NOTEST	0	0	0	0	1	1	no	LOWDATA	0.184536	0.404177	1.13109	0	1	1	no	NOTEST	0	0	0	0	1	1	no
13102.m03770	LOC_Os02g34790.1	=	receptor-like protein kinase 5 precursor, putative, expressed	chr02:20849769-20866326	LOWDATA	0.416835	0.373919	-0.156752	0	1	1	no	LOWDATA	0.193388	0.0354347	-2.44826	0	1	1	no	NOTEST	0.0629647	0.121578	0.949272	-0.164009	0.869724	1	no	FAIL	0.0588558	0.113311	0	0	1	1	no
13102.m03771	LOC_Os02g34800.1	=	leucine-rich repeat receptor protein kinase EXS precursor, putative	chr02:20849769-20866326	LOWDATA	0.194416	0.192866	-0.0115542	0	1	1	no	NOTEST	0.169573	0	0	0	1	1	no	NOTEST	0.0276102	0.0710834	1.36431	-0.155533	0.876401	1	no	FAIL	0	0.124218	0	0	1	1	no
13102.m03772	LOC_Os02g34810.1	=	OsAPx8 - Thylakoid-bound Ascorbate Peroxidase encoding gene 5,8, expressed	chr02:20849769-20866326	LOWDATA	35.5331	3.18379	-3.48035	0	1	1	no	LOWDATA	51.6384	29.7265	-0.796696	0	1	1	no	LOWDATA	38.6696	20.4382	-0.919937	0	1	1	no	FAIL	37.3701	0	0	0	1	1	no
13102.m03794	LOC_Os02g35010.1	=	STE_MEKK_ste11_MAP3K.9 - STE kinases include homologs to sterile 7, sterile 11 and sterile 20 from yeast, expressed	chr02:20980054-21002541	LOWDATA	0.742681	2.44243	1.7175	0	1	1	no	LOWDATA	2.32899	2.86787	0.300277	0	1	1	no	LOWDATA	1.57471	2.80336	0.832076	0	1	1	no	OK	3.88785	6.28149	0.692133	-0.80085	0.423219	1	no
13102.m03795	LOC_Os02g35020.1	=	glycosyl transferase, putative, expressed	chr02:21008578-21013546	LOWDATA	0.270108	0.526919	0.964044	0	1	1	no	NOTEST	0.248183	1.06942	2.10735	-2.77581	0.00550648	1	no	NOTEST	0.601015	0.776752	0.370055	-0.173075	0.862592	1	no	NOTEST	0.503998	3.55775	2.81948	-2.43779	0.0147775	1	no
13102.m04067	LOC_Os02g37130.2	=	expressed protein	chr02:22439110-22443133	LOWDATA	0.5246	0.200186	-1.38988	0	1	1	no	NOTEST	0.772572	0	0	0	1	1	no	LOWDATA	0.194662	0.248603	0.352869	0	1	1	no	NOTEST	0	0	0	0	1	1	no
13102.m04084	LOC_Os02g37290.1	=	heavy metal associated domain containing protein, expressed	chr02:22544922-22548419	LOWDATA	4.56448	4.83479	0.083004	0	1	1	no	LOWDATA	4.54453	1.75897	-1.36941	0	1	1	no	OK	3.53497	1.91845	-0.881759	0.240976	0.809574	1	no	LOWDATA	2.66676	3.18102	0.254398	0	1	1	no
13102.m04121	LOC_Os02g37654.1	=	lecithin:cholesterol acyltransferase, putative, expressed	chr02:22715321-22760534	LOWDATA	16.1378	5.92438	-1.44571	0	1	1	no	LOWDATA	14.5705	15.8913	0.125182	0	1	1	no	OK	21.3614	9.91586	-1.1072	1.97019	0.0488167	0.359894	no	OK	18.3252	14.6963	-0.318381	0.415103	0.678066	1	no
13102.m04122	LOC_Os02g37680.1	=	transposon protein, putative, CACTA, En/Spm sub-class	chr02:22715321-22760534	LOWDATA	0.0953905	0.039429	-1.27459	0	1	1	no	NOTEST	0.0924456	0.0508235	-0.863108	0.488478	0.625211	1	no	LOWDATA	0.067732	0.0871891	0.36431	0	1	1	no	NOTEST	0.0422081	0	-1e+300	-1e+300	0.158655	1	no
13102.m04123	LOC_Os02g37690.1	=	UDP-glucoronosyl and UDP-glucosyl transferase, putative, expressed	chr02:22715321-22760534	LOWDATA	14.5436	10.2245	-0.508357	0	1	1	no	NOTEST	0.0801095	0	0	0	1	1	no	LOWDATA	18.1047	12.5909	-0.523984	0	1	1	no	NOTEST	0.782202	0	0	0	1	1	no
13102.m04125	LOC_Os02g37700.1	=	lecithin:cholesterol acyltransferase, putative, expressed	chr02:22715321-22760534	LOWDATA	8.20777	5.50391	-0.576533	0	1	1	no	LOWDATA	6.78328	5.02369	-0.433234	0	1	1	no	LOWDATA	6.6698	5.32982	-0.323556	0	1	1	no	OK	6.60973	5.10699	-0.372116	0.414436	0.678555	1	no
13102.m04126	LOC_Os02g37710.1	=	lecithine cholesterol acyltransferase, putative	chr02:22715321-22760534	LOWDATA	2.07154	0.733932	-1.49698	0	1	1	no	NOTEST	0	0	0	0	1	1	no	LOWDATA	2.02513	0.368898	-2.45672	0	1	1	no	NOTEST	0.142866	0	-1e+300	-1e+300	0.0786496	1	no
13102.m04178	LOC_Os02g38050.4	=	joka2, putative, expressed	chr02:22975963-22981727	LOWDATA	0.76383	0.489864	-0.64087	0	1	1	no	NOTEST	1.77439	0	0	0	1	1	no	OK	1.99206	0.831502	-1.26047	0.0949264	0.924373	1	no	NOTEST	0.918656	0	0	0	1	1	no
13102.m04201	LOC_Os02g38200.1	=	dehydrogenase, putative, expressed	chr02:23101048-23104521	LOWDATA	7.68925	7.95587	0.0491761	0	1	1	no	LOWDATA	11.6762	6.99261	-0.739664	0	1	1	no	LOWDATA	11.0924	10.4741	-0.0827382	0	1	1	no	OK	8.71515	10.0771	0.209476	-0.345741	0.729537	1	no
13102.m04206	LOC_Os02g38250.1	=	EMB1745, putative, expressed	chr02:23110270-23138403	LOWDATA	5.06386	6.81474	0.428421	0	1	1	no	OK	4.82946	2.579	-0.90505	0.70082	0.483416	0.769025	no	OK	3.50009	4.54708	0.377549	-0.270197	0.787009	1	no	OK	4.51416	4.53887	0.00787433	-0.00693057	0.99447	1	no
13102.m04301	LOC_Os02g38980.5	=	bromodomain domain containing protein, expressed	chr02:23543304-23548513	LOWDATA	0.543218	1.25875	1.21239	0	1	1	no	LOWDATA	1.09869	0.518985	-1.08202	0	1	1	no	LOWDATA	0.319109	0.887443	1.47561	0	1	1	no	LOWDATA	0.389336	0.249004	-0.644844	0	1	1	no
13102.m04354	LOC_Os02g39384.1	=	hypothetical protein	chr02:23753150-23769799	LOWDATA	9.33081	6.39224	-0.545681	0	1	1	no	OK	15.0182	16.9617	0.175568	-0.305539	0.759956	0.924457	no	LOWDATA	1.46328	2.09574	0.518257	0	1	1	no	OK	5.52131	5.06663	-0.123984	0.0238235	0.980993	1	no
13102.m04380	LOC_Os02g39560.1	=	non-receptor tyrosine kinase spore lysis A, putative, expressed	chr02:23860328-23875948	LOWDATA	11.0184	9.36752	-0.234177	0	1	1	no	OK	8.35883	1.24364	-2.74873	1.36643	0.171805	0.487251	no	LOWDATA	6.83678	10.02	0.551488	0	1	1	no	OK	9.02848	7.10944	-0.344746	0.463401	0.643077	1	no
13102.m04411	LOC_Os02g39720.6	=	splicing factor, arginine/serine-rich 7, putative, expressed	chr02:23968238-23990544	LOWDATA	3.92561	5.96065	0.602553	0	1	1	no	LOWDATA	5.87886	4.72937	-0.313887	0	1	1	no	LOWDATA	4.66282	5.74675	0.301544	0	1	1	no	OK	5.10567	4.35091	-0.230782	0.332425	0.739569	1	no
13102.m04596	LOC_Os02g41630.2	=	phenylalanine ammonia-lyase, putative, expressed	chr02:24967504-24989545	LOWDATA	168.138	159.691	-0.0743681	0	1	1	no	LOWDATA	131.277	229.222	0.804126	0	1	1	no	OK	97.8205	83.0223	-0.236637	0.399567	0.689475	1	no	LOWDATA	84.3923	119.759	0.504953	0	1	1	no
13102.m04645	LOC_Os02g42020.2	=	expressed protein	chr02:25236541-25257431	LOWDATA	0.593185	1.28312	1.1131	0	1	1	no	NOTEST	0.506706	0	0	0	1	1	no	LOWDATA	0.373994	0.506479	0.437487	0	1	1	no	LOWDATA	0.423481	0.603549	0.511174	0	1	1	no
13102.m04873	LOC_Os02g43850.2	=	serine esterase family protein, putative, expressed	chr02:26470786-26475369	LOWDATA	0.602638	0.817635	0.440166	0	1	1	no	NOTEST	1.92773	0.957756	-1.00917	0.230131	0.81799	1	no	LOWDATA	0.302477	0.494626	0.709513	0	1	1	no	LOWDATA	0.343806	0.495138	0.526235	0	1	1	no
13102.m04872	LOC_Os02g43850.5	=	serine esterase family protein, putative, expressed	chr02:26470786-26475369	LOWDATA	0.334688	0.822231	1.29673	0	1	1	no	LOWDATA	0.485238	0.17181	-1.49788	0	1	1	no	LOWDATA	0.146403	0.490743	1.74503	0	1	1	no	LOWDATA	0.105195	0.201542	0.938009	0	1	1	no
13102.m05304	LOC_Os02g47150.1	=	DNA topoisomerase 2, putative, expressed	chr02:28771134-28794895	LOWDATA	8.54205	7.24995	-0.236612	0	1	1	no	OK	8.33799	3.28739	-1.34276	2.1544	0.031209	0.199448	no	OK	4.55808	5.16969	0.181651	-0.208564	0.834788	1	no	OK	7.04732	3.97001	-0.82793	1.05894	0.289626	0.961726	no
13102.m05365	LOC_Os02g47600.2	=	soluble inorganic pyrophosphatase, putative, expressed	chr02:29072362-29091582	LOWDATA	1.63144	1.29884	-0.328924	0	1	1	no	LOWDATA	2.24518	0.726068	-1.62865	0	1	1	no	LOWDATA	0.756679	0.709124	-0.0936429	0	1	1	no	NOTEST	0	0	0	0	1	1	no
13102.m05441	LOC_Os02g48184.1	=	expressed protein	chr02:29475131-29501275	LOWDATA	1.66325	3.4827	1.0662	0	1	1	no	LOWDATA	2.27617	2.24585	-0.0193475	0	1	1	no	LOWDATA	0.659207	1.77892	1.4322	0	1	1	no	LOWDATA	1.81184	1.22663	-0.562755	0	1	1	no
13102.m05491	LOC_Os02g48560.4	=	fatty acid desaturase, putative, expressed	chr02:29709854-29724486	LOWDATA	2.45118	2.73362	0.15734	0	1	1	no	OK	8.31399	0.684899	-3.60158	1.53918	0.12376	0.418141	no	LOWDATA	1.89543	1.14396	-0.728485	0	1	1	no	LOWDATA	4.40794	0.790754	-2.4788	0	1	1	no
13102.m05494	LOC_Os02g48560.3	=	fatty acid desaturase, putative, expressed	chr02:29709854-29724486	LOWDATA	20.0161	22.471	0.166907	0	1	1	no	OK	32.0046	37.274	0.219891	-0.371758	0.710073	0.900852	no	LOWDATA	11.4015	3.7288	-1.61245	0	1	1	no	LOWDATA	15.1296	4.40679	-1.77957	0	1	1	no
13102.m05580	LOC_Os02g49240.1	=	expressed protein	chr02:30088354-30094311	LOWDATA	0.308365	0.641946	1.05781	0	1	1	no	LOWDATA	0.384476	0.0735755	-2.3856	0	1	1	no	NOTEST	0.159914	1.06837	2.74005	-0.502398	0.615388	1	no	NOTEST	0.633362	1.09952	0.795769	-0.289448	0.772238	1	no
13102.m05678	LOC_Os02g49992.1	=	expressed protein	chr02:30536299-30591187	LOWDATA	6.23823	10.4082	0.73851	0	1	1	no	OK	6.17498	3.04847	-1.01835	1.18499	0.23602	0.565905	no	LOWDATA	2.60585	6.55273	1.33034	0	1	1	no	LOWDATA	1.88056	4.10463	1.12609	0	1	1	no
13102.m05682	LOC_Os02g50020.1	=	hypothetical protein	chr02:30536299-30591187	LOWDATA	0.483473	2.26012	2.22489	0	1	1	no	LOWDATA	1.77796	5.3307	1.58411	0	1	1	no	LOWDATA	0.148714	0.756993	2.34774	0	1	1	no	LOWDATA	0.212026	0.914592	2.10889	0	1	1	no
13102.m05685	LOC_Os02g50050.1	=	expressed protein	chr02:30536299-30591187	LOWDATA	2.2189	2.69649	0.281239	0	1	1	no	NOTEST	0.838653	1.27689	0.606483	-0.365616	0.714651	1	no	LOWDATA	1.10295	1.74433	0.661306	0	1	1	no	LOWDATA	1.355	1.55953	0.202823	0	1	1	no
13102.m05691	LOC_Os02g50110.1	=	hypothetical protein	chr02:30536299-30591187	LOWDATA	14.8389	87.5342	2.56046	0	1	1	no	LOWDATA	3.07264	45.9483	3.90246	0	1	1	no	LOWDATA	0.480371	40.3511	6.39232	0	1	1	no	LOWDATA	3.67604	38.5213	3.38943	0	1	1	no
13102.m05736	LOC_Os02g50550.1	=	dynamin, putative, expressed	chr02:30848170-30877815	LOWDATA	10.3797	7.37766	-0.492534	0	1	1	no	LOWDATA	10.7153	6.1232	-0.807321	0	1	1	no	LOWDATA	10.4039	10.038	-0.051654	0	1	1	no	LOWDATA	9.13002	7.58194	-0.26805	0	1	1	no
13102.m05872	LOC_Os02g51610.1	=	CRAL/TRIO domain containing protein, expressed	chr02:31598598-31602313	LOWDATA	10.5368	15.8284	0.587083	0	1	1	no	OK	4.99202	2.95642	-0.75577	1.23792	0.215747	0.543373	no	LOWDATA	8.2931	16.4259	0.985984	0	1	1	no	OK	7.17516	7.79965	0.120399	-0.193698	0.846412	1	no
13102.m05887	LOC_Os02g51750.1	=	annexin, putative, expressed	chr02:31692291-31694634	LOWDATA	22.0523	41.1479	0.899892	0	1	1	no	OK	17.4885	31.1221	0.831532	-1.5932	0.111116	0.397098	no	OK	20.5297	35.7221	0.799107	-1.98339	0.0473243	0.3528	no	LOWDATA	23.3835	53.5328	1.19494	0	1	1	no
13102.m05976	LOC_Os02g52420.2	=	peptidase, M24 family protein, putative, expressed	chr02:32056337-32079706	LOWDATA	5.13491	6.30311	0.295724	0	1	1	no	OK	7.95913	6.80844	-0.225285	0.181334	0.856105	0.968352	no	LOWDATA	8.20833	4.07047	-1.01189	0	1	1	no	OK	6.43465	2.42783	-1.4062	0.51869	0.603977	1	no
13102.m05980	LOC_Os02g52450.1	=	regulator of ribonuclease, putative, expressed	chr02:32080423-32115126	LOWDATA	0.646322	0.769828	0.252283	0	1	1	no	LOWDATA	1.80864	0.375721	-2.26717	0	1	1	no	LOWDATA	0.0861715	0.581357	2.75414	0	1	1	no	LOWDATA	0.433158	0.510403	0.236746	0	1	1	no
13102.m05984	LOC_Os02g52470.1	=	ATP-binding domain-containing protein, putative, expressed	chr02:32080423-32115126	LOWDATA	0.908419	1.07307	0.24031	0	1	1	no	NOTEST	1.93758	1.43754	-0.43065	0.262525	0.792917	1	no	LOWDATA	1.35412	3.19066	1.2365	0	1	1	no	NOTEST	2.02348	3.51467	0.796548	-0.469818	0.638485	1	no
13102.m05995	LOC_Os02g52580.1	=	retrotransposon protein, putative, unclassified	chr02:32166811-32173255	LOWDATA	0.058645	0.0928228	0.662471	0	1	1	no	NOTEST	0.0198835	0.0272009	0.452077	-0.218143	0.827318	1	no	NOTEST	0.0208565	0.0412838	0.985083	-0.713505	0.475534	1	no	NOTEST	0	0	0	0	1	1	no
13102.m06044	LOC_Os02g53000.2	=	lysM domain-containing GPI-anchored protein precursor, putative, expressed	chr02:32420452-32423529	LOWDATA	0.125778	0.192504	0.614014	0	1	1	no	LOWDATA	0.143918	0.0706186	-1.02713	0	1	1	no	LOWDATA	0.0534983	0.0428234	-0.321091	0	1	1	no	NOTEST	0	0	0	0	1	1	no
13102.m06050	LOC_Os02g53050.1	=	tetratricopeptide-like helical, putative, expressed	chr02:32450673-32470314	LOWDATA	3.48342	4.84097	0.47479	0	1	1	no	LOWDATA	3.21933	0.494043	-2.70405	0	1	1	no	LOWDATA	1.72941	2.73898	0.66336	0	1	1	no	LOWDATA	2.55622	3.15338	0.302891	0	1	1	no
13102.m06051	LOC_Os02g53060.1	=	peptidase, T1 family, putative, expressed	chr02:32450673-32470314	LOWDATA	18.5996	20.3974	0.133115	0	1	1	no	LOWDATA	25.2804	19.9119	-0.344391	0	1	1	no	LOWDATA	23.4183	3.5131	-2.73682	0	1	1	no	LOWDATA	19.2181	36.6563	0.931599	0	1	1	no
13102.m06052	LOC_Os02g53070.1	=	HYS1, putative, expressed	chr02:32450673-32470314	LOWDATA	2.10934	2.68412	0.347655	0	1	1	no	NOTEST	1.9586	1.46494	-0.418982	0.293699	0.768988	1	no	LOWDATA	1.43483	2.99761	1.06293	0	1	1	no	LOWDATA	1.71498	2.04593	0.25457	0	1	1	no
13102.m06053	LOC_Os02g53080.1	=	expressed protein	chr02:32450673-32470314	LOWDATA	2.27793	2.59306	0.186932	0	1	1	no	NOTEST	2.48044	1.31807	-0.912168	0.564362	0.572508	1	no	LOWDATA	0.409068	0.765084	0.903276	0	1	1	no	LOWDATA	0.402372	0.763129	0.923399	0	1	1	no
13102.m06147	LOC_Os02g53750.1	=	tyrosine protein kinase domain containing protein, putative, expressed	chr02:32909438-32955521	LOWDATA	13.3594	30.8866	1.20912	0	1	1	no	OK	8.45602	10.6805	0.336934	-0.4928	0.622154	0.854812	no	LOWDATA	8.66768	21.2791	1.29572	0	1	1	no	LOWDATA	10.8536	20.0438	0.884976	0	1	1	no
13102.m06213	LOC_Os02g54254.1	=	saccharopine dehydrogenase, putative, expressed	chr02:33243650-33260734	LOWDATA	2.60758	28.0846	3.429	0	1	1	no	OK	1.05948	3.99602	1.91521	-1.15457	0.248268	0.579872	no	OK	1.65924	19.2891	3.53919	-5.17927	2.2276e-07	3.57342e-05	yes	LOWDATA	3.05102	12.5915	2.04508	0	1	1	no
13102.m06214	LOC_Os02g54254.4	=	saccharopine dehydrogenase, putative, expressed	chr02:33243650-33260734	LOWDATA	0.0804503	1.37457	4.09474	0	1	1	no	NOTEST	0	0	0	0	1	1	no	LOWDATA	0.0559231	0.369578	2.72437	0	1	1	no	LOWDATA	0.0661465	0.375654	2.50567	0	1	1	no
13102.m06219	LOC_Os02g54300.1	=	expressed protein	chr02:33293551-33313402	LOWDATA	0.313004	0.277741	-0.172443	0	1	1	no	NOTEST	0.78002	0.214431	-1.863	1.8655	0.0621116	1	no	NOTEST	0.509014	0.286115	-0.83111	0.838926	0.401511	1	no	NOTEST	0.237442	0.573302	1.27172	-1.21104	0.22588	1	no
13102.m06221	LOC_Os02g54320.1	=	retrotransposon protein, putative, unclassified	chr02:33293551-33313402	LOWDATA	0.0717511	0.0889734	0.310374	0	1	1	no	NOTEST	0	0	0	0	1	1	no	NOTEST	0	0	0	0	1	1	no	NOTEST	0	0	0	0	1	1	no
13102.m06222	LOC_Os02g54330.1	=	OsFBDUF14 - F-box and DUF domain containing protein	chr02:33293551-33313402	LOWDATA	0.181573	0.0281445	-2.68963	0	1	1	no	NOTEST	0.16497	0.253932	0.622242	-0.696312	0.486234	1	no	NOTEST	0.145034	0.124465	-0.220653	0.211146	0.832773	1	no	NOTEST	0.0301266	0.0362503	0.266953	-0.130842	0.895901	1	no
13102.m06223	LOC_Os02g54340.1	=	26S protease regulatory subunit 7, putative, expressed	chr02:33293551-33313402	LOWDATA	24.2679	27.2786	0.168718	0	1	1	no	OK	22.6164	17.2752	-0.38867	0.694404	0.487429	0.770894	no	OK	23.9963	37.2354	0.633865	-1.01158	0.31174	0.868619	no	OK	29.3247	32.8749	0.16487	-0.344184	0.730708	1	no
13102.m06335	LOC_Os02g55260.2	=	DEAD-box ATP-dependent RNA helicase, putative, expressed	chr02:33832691-33837778	LOWDATA	1.08662	1.00405	-0.114024	0	1	1	no	NOTEST	0.871283	0	-1e+300	-1e+300	0.00228074	1	no	NOTEST	0.706583	1.3155	0.896677	-1.10894	0.267454	1	no	NOTEST	0.972717	0	-1e+300	-1e+300	0.00407171	1	no
13102.m06334	LOC_Os02g55260.1	=	DEAD-box ATP-dependent RNA helicase, putative, expressed	chr02:33832691-33837778	LOWDATA	1.56768	1.3551	-0.21023	0	1	1	no	NOTEST	2.41546	1.60592	-0.588899	0.928996	0.352891	1	no	OK	2.26275	2.53634	0.164672	-0.228617	0.819167	1	no	OK	3.47558	4.62351	0.411736	-0.504483	0.613922	1	no
13102.m06340	LOC_Os02g55310.1	=	pentatricopeptide, putative, expressed	chr02:33842260-33862601	LOWDATA	2.76438	2.83745	0.037643	0	1	1	no	OK	3.634	1.88137	-0.949774	0.839337	0.40128	0.713058	no	OK	2.65754	2.26049	-0.233454	0.215974	0.829008	1	no	NOTEST	2.61578	2.13352	-0.294004	0.437614	0.661666	1	no
13102.m06341	LOC_Os02g55320.1	=	two-component response regulator, putative, expressed	chr02:33842260-33862601	LOWDATA	8.46613	12.0458	0.508754	0	1	1	no	OK	7.44181	6.89724	-0.109636	0.185032	0.853204	0.967411	no	OK	4.81263	11.7205	1.28414	-1.74153	0.0815906	0.484216	no	OK	8.0964	11.141	0.460525	-0.723292	0.4695	1	no
13102.m06396	LOC_Os02g55770.1	=	expressed protein	chr02:34065158-34149800	LOWDATA	0.114715	0.0688311	-0.736918	0	1	1	no	LOWDATA	0.19381	0.0535915	-1.85457	0	1	1	no	LOWDATA	0.0907808	0.112825	0.313622	0	1	1	no	LOWDATA	0.375867	0.146282	-1.36147	0	1	1	no
13102.m06453	LOC_Os02g56170.1	=	inositol-1-monophosphatase, putative, expressed	chr02:34342712-34382312	LOWDATA	0.649783	0.456136	-0.510495	0	1	1	no	LOWDATA	2.12014	0.398314	-2.41218	0	1	1	no	LOWDATA	0.65905	0.771554	0.227381	0	1	1	no	LOWDATA	0.780327	1.24548	0.674552	0	1	1	no
13102.m06542	LOC_Os02g56920.1	=	WAX2, putative, expressed	chr02:34883685-34888014	LOWDATA	15.9476	8.77399	-0.862038	0	1	1	no	LOWDATA	25.3791	16.9623	-0.581308	0	1	1	no	OK	12.1062	9.13146	-0.406827	0.647033	0.51761	0.991474	no	OK	22.1274	11.7388	-0.914545	1.64039	0.100923	0.623992	no
13102.m06549	LOC_Os02g56950.2	=	expressed protein	chr02:34895745-34909617	LOWDATA	0.3248	0.310825	-0.0634468	0	1	1	no	NOTEST	0.419355	0.195491	-1.10107	0.479802	0.631368	1	no	LOWDATA	0.0889955	0.366669	2.04267	0	1	1	no	LOWDATA	0.248308	0.185064	-0.424109	0	1	1	no
13102.m06548	LOC_Os02g56950.1	=	expressed protein	chr02:34895745-34909617	LOWDATA	0.800843	0.558533	-0.519877	0	1	1	no	NOTEST	0.521987	0	0	0	1	1	no	LOWDATA	0.692189	0.468281	-0.563792	0	1	1	no	LOWDATA	0.283814	0.363592	0.357374	0	1	1	no
13102.m06568	LOC_Os02g57100.1	=	expressed protein	chr02:34957754-34960758	LOWDATA	7.31065	5.19604	-0.492589	0	1	1	no	OK	9.75262	5.23218	-0.898378	1.41803	0.156181	0.466713	no	LOWDATA	6.83646	4.13534	-0.725242	0	1	1	no	LOWDATA	6.86369	5.83814	-0.233476	0	1	1	no
13102.m06696	LOC_Os02g57870.1	=	expressed protein	chr02:35420016-35508380	LOWDATA	1.75145	1.37551	-0.348589	0	1	1	no	NOTEST	1.79286	0.606496	-1.56369	1.3196	0.186967	1	no	NOTEST	1.40411	0.907068	-0.630377	0.392546	0.694655	1	no	NOTEST	1.01706	0.792548	-0.359829	0.235321	0.813959	1	no
13102.m06697	LOC_Os02g57880.1	=	hypothetical protein	chr02:35420016-35508380	LOWDATA	0.0912689	0.165992	0.862915	0	1	1	no	NOTEST	0.0336115	0	0	0	1	1	no	NOTEST	0.047522	0.16869	1.82771	-0.503747	0.614439	1	no	NOTEST	0.0242296	0.0971819	2.00392	-0.924411	0.355272	1	no
13102.m06698	LOC_Os02g57890.1	=	OsFBX72 - F-box domain containing protein	chr02:35420016-35508380	LOWDATA	0.730304	0.911246	0.319344	0	1	1	no	NOTEST	0.934505	0.514447	-0.86118	0.143176	0.886151	1	no	LOWDATA	0.984201	0.681338	-0.530582	0	1	1	no	NOTEST	0.654966	0.955417	0.544709	-0.104024	0.917151	1	no
13102.m06701	LOC_Os02g57920.1	=	expressed protein	chr02:35420016-35508380	LOWDATA	0.412187	0.501188	0.282054	0	1	1	no	NOTEST	0.534485	0.263216	-1.0219	0.500165	0.616959	1	no	NOTEST	0.250922	0.279068	0.153379	-0.0548098	0.95629	1	no	LOWDATA	0.400563	0.44786	0.16102	0	1	1	no
13102.m06704	LOC_Os02g57940.1	=	OsFBX74 - F-box domain containing protein, expressed	chr02:35420016-35508380	LOWDATA	0.198371	0.176802	-0.166064	0	1	1	no	NOTEST	0.147789	0.138703	-0.0915412	0.0240684	0.980798	1	no	NOTEST	0.32862	0.234172	-0.488849	0.160723	0.872311	1	no	NOTEST	0.227639	0.198007	-0.201196	0.229992	0.818098	1	no
13102.m06708	LOC_Os02g57980.1	=	DEAD/DEAH box helicase, putative, expressed	chr02:35420016-35508380	LOWDATA	1.41763	2.22596	0.650946	0	1	1	no	LOWDATA	2.39853	2.51404	0.067862	0	1	1	no	OK	1.85391	2.72247	0.554347	-0.157736	0.874665	1	no	LOWDATA	2.23062	2.1775	-0.0347694	0	1	1	no
13102.m06729	LOC_Os02g58139.3	=	OsSigP1 - Putative Type I Signal Peptidase homologue	chr02:35566199-35597741	LOWDATA	0.177847	1.1339	2.67258	0	1	1	no	NOTEST	0.266627	0	-1e+300	-1e+300	0.445456	1	no	NOTEST	0.165241	1.6832	3.34857	-0.220669	0.82535	1	no	NOTEST	0	0	0	0	1	1	no
13102.m06732	LOC_Os02g58160.2	=	expressed protein	chr02:35566199-35597741	LOWDATA	0.551106	0.652578	0.243821	0	1	1	no	LOWDATA	0.663134	0.317167	-1.06406	0	1	1	no	LOWDATA	0.248307	0.415936	0.744233	0	1	1	no	NOTEST	0	0	0	0	1	1	no
13102.m06733	LOC_Os02g58160.1	=	expressed protein	chr02:35566199-35597741	LOWDATA	1.17441	1.20759	0.0402043	0	1	1	no	LOWDATA	1.68899	1.22577	-0.462469	0	1	1	no	LOWDATA	0.899013	1.76812	0.975803	0	1	1	no	NOTEST	2.02037	1.57388	-0.360291	0.111203	0.911456	1	no
13103.m12823	LOC_Os03g01018.1	=	phosphoribosyl transferase, putative, expressed	chr03:18101-22618	LOWDATA	0.545859	0.117312	-2.21818	0	1	1	no	NOTEST	1.92519	1.00477	-0.938134	0.355718	0.722052	1	no	LOWDATA	0.589495	0.225861	-1.38405	0	1	1	no	NOTEST	1.41314	0.548877	-1.36435	0.231519	0.816912	1	no
13103.m00026	LOC_Os03g01210.2	=	uncharacterized Cys-rich domain containing protein, putative, expressed	chr03:134223-148002	LOWDATA	23.8488	26.7744	0.166941	0	1	1	no	OK	22.2575	22.0988	-0.0103186	0.0162966	0.986998	1	no	OK	14.7278	17.8922	0.280788	-0.403489	0.686588	1	no	OK	18.9335	17.2748	-0.132269	0.216304	0.828751	1	no
13103.m00095	LOC_Os03g01720.1	=	protein binding protein, putative	chr03:439164-458640	LOWDATA	0.352148	0.181233	-0.958338	0	1	1	no	LOWDATA	0.282159	0.147659	-0.934237	0	1	1	no	LOWDATA	0.127491	0.0753484	-0.758748	0	1	1	no	NOTEST	0.116154	0	0	0	1	1	no
13103.m00101	LOC_Os03g01730.3	=	expressed protein	chr03:464175-467044	LOWDATA	0.254318	0.387428	0.607293	0	1	1	no	NOTEST	1.46789	0.375508	-1.96683	0.525006	0.599579	1	no	LOWDATA	0.155039	0.110796	-0.484719	0	1	1	no	NOTEST	0.251617	0.768069	1.61001	-0.356846	0.721207	1	no
13103.m00110	LOC_Os03g01760.1	=	exostosin family domain containing protein, expressed	chr03:478164-481006	LOWDATA	3.9635	4.84539	0.289837	0	1	1	no	OK	4.39763	2.21238	-0.991126	1.19952	0.230327	0.559483	no	LOWDATA	3.49014	4.92794	0.497697	0	1	1	no	LOWDATA	5.09342	4.6972	-0.116833	0	1	1	no
13103.m00284	LOC_Os03g03080.1	=	hypothetical protein	chr03:1268853-1299382	LOWDATA	0.254289	0.998533	1.97334	0	1	1	no	LOWDATA	1.17059	0.880701	-0.410507	0	1	1	no	NOTEST	0.12038	0.581102	2.2712	-0.539326	0.589662	1	no	NOTEST	0.168786	0.541585	1.68199	-0.770279	0.441134	1	no
13103.m00306	LOC_Os03g03270.2	=	fringe-related protein, putative, expressed	chr03:1401825-1404074	LOWDATA	0	0	5.32571e-315	0	1	1	no	NOTEST	0	0	0	0	1	1	no	NOTEST	0	0	0	0	1	1	no	NOTEST	0	0	0	0	1	1	no
13103.m00307	LOC_Os03g03270.1	=	fringe-related protein, putative, expressed	chr03:1401825-1404074	LOWDATA	0	0	0	0	1	1	no	NOTEST	0	0	0	0	1	1	no	NOTEST	0	0	0	0	1	1	no	NOTEST	0	0	0	0	1	1	no
13103.m00319	LOC_Os03g03390.1	=	G-patch domain containing protein, expressed	chr03:1427205-1460714	LOWDATA	21.7585	30.8661	0.504443	0	1	1	no	OK	24.5499	27.6216	0.170083	-0.3473	0.728366	0.909286	no	OK	15.7414	26.2897	0.739932	-1.06387	0.287386	0.843523	no	LOWDATA	4.55114	20.3161	2.15832	0	1	1	no
13103.m00321	LOC_Os03g03400.1	=	diacylglycerol kinase, putative, expressed	chr03:1427205-1460714	LOWDATA	3.85991	6.04605	0.647426	0	1	1	no	OK	7.27758	3.66018	-0.991545	0.913944	0.360746	0.681376	no	OK	5.39655	6.29317	0.221749	-0.239041	0.811074	1	no	LOWDATA	6.58928	6.56978	-0.00427538	0	1	1	no
13103.m00322	LOC_Os03g03410.1	=	serine/threonine-protein kinase, putative, expressed	chr03:1427205-1460714	LOWDATA	19.2001	17.3669	-0.144774	0	1	1	no	OK	19.453	15.2913	-0.347282	0.356967	0.721117	0.906124	no	OK	9.89731	16.9672	0.77764	-0.982854	0.325679	0.878954	no	OK	18.8223	22.4444	0.253911	-0.40528	0.685272	1	no
13103.m00338	LOC_Os03g03500.1	=	heavy metal-associated domain containing protein, expressed	chr03:1510318-1526211	LOWDATA	0.513375	0.590037	0.200791	0	1	1	no	NOTEST	0.686824	0	0	0	1	1	no	NOTEST	0	0	0	0	1	1	no	NOTEST	0	0	0	0	1	1	no
13103.m00356	LOC_Os03g03660.2	=	CAMK_CAMK_like.17 - CAMK includes calcium/calmodulin depedent protein kinases, expressed	chr03:1623874-1648010	LOWDATA	0.880212	0.626584	-0.490343	0	1	1	no	NOTEST	1.5227	0	0	0	1	1	no	LOWDATA	0.394247	2.64058	2.74369	0	1	1	no	LOWDATA	0.420807	1.9739	2.22982	0	1	1	no
13103.m00359	LOC_Os03g03660.1	=	CAMK_CAMK_like.17 - CAMK includes calcium/calmodulin depedent protein kinases, expressed	chr03:1623874-1648010	LOWDATA	13.0529	11.2124	-0.219285	0	1	1	no	LOWDATA	7.17999	5.38818	-0.414182	0	1	1	no	OK	4.16078	4.7962	0.205037	-0.124563	0.90087	1	no	OK	5.98665	6.94541	0.214311	-0.21842	0.827102	1	no
13103.m00357	LOC_Os03g03660.3	=	CAMK_CAMK_like.17 - CAMK includes calcium/calmodulin depedent protein kinases, expressed	chr03:1623874-1648010	LOWDATA	14.922	17.3716	0.219286	0	1	1	no	LOWDATA	12.9749	5.0243	-1.36873	0	1	1	no	OK	15.8789	24.3586	0.617318	-1.06262	0.287955	0.84393	no	OK	19.4016	12.2096	-0.668167	0.987233	0.323528	0.994932	no
13103.m00361	LOC_Os03g03680.1	=	transporter family protein, putative, expressed	chr03:1623874-1648010	LOWDATA	0.555575	0.537878	-0.0467016	0	1	1	no	LOWDATA	0.957084	0.0984077	-3.2818	0	1	1	no	LOWDATA	0.264391	0.751819	1.50771	0	1	1	no	LOWDATA	0.424205	0.484069	0.190448	0	1	1	no
13103.m00363	LOC_Os03g03690.3	=	glycosylphosphatidylinositol anchor biosynthesis protein 11, putative, expressed	chr03:1623874-1648010	LOWDATA	1.31205	2.26303	0.78643	0	1	1	no	LOWDATA	0.839956	2.92544	1.80027	0	1	1	no	OK	1.71129	3.22898	0.91599	-0.359765	0.719023	1	no	OK	3.7922	0.85749	-2.14484	0.475472	0.634451	1	no
13103.m00378	LOC_Os03g03790.1	=	AMP-binding domain containing protein, expressed	chr03:1704892-1747190	LOWDATA	6.07733	1.43029	-2.08713	0	1	1	no	OK	12.2722	3.50365	-1.80846	1.06974	0.284734	0.614997	no	LOWDATA	6.65706	2.96903	-1.16489	0	1	1	no	OK	7.51852	5.04196	-0.576464	0.370372	0.711105	1	no
13103.m00381	LOC_Os03g03820.1	=	adenylate kinase, putative, expressed	chr03:1704892-1747190	LOWDATA	15.5217	16.9136	0.123895	0	1	1	no	OK	19.7463	13.1326	-0.588427	0.889218	0.373886	0.690396	no	OK	20.0628	19.6311	-0.0313817	0.0599232	0.952217	1	no	OK	21.091	17.5392	-0.266045	0.427427	0.669069	1	no
13103.m00523	LOC_Os03g04990.1	=	expressed protein	chr03:2374079-2579566	LOWDATA	7.92686	8.78844	0.148858	0	1	1	no	LOWDATA	10.6743	4.74049	-1.17103	0	1	1	no	LOWDATA	0.136887	6.37892	5.54226	0	1	1	no	LOWDATA	14.9177	7.73591	-0.947385	0	1	1	no
13103.m00526	LOC_Os03g05020.1	=	PIR, putative, expressed	chr03:2374079-2579566	LOWDATA	5.17709	11.2834	1.12399	0	1	1	no	LOWDATA	6.85716	4.6682	-0.554745	0	1	1	no	LOWDATA	4.54435	5.68162	0.322229	0	1	1	no	LOWDATA	1.72151	4.17436	1.27788	0	1	1	no
13103.m00531	LOC_Os03g05060.2	=	exostosin family domain containing protein, expressed	chr03:2374079-2579566	LOWDATA	2.29197	1.01639	-1.17313	0	1	1	no	LOWDATA	0.0441302	0.0485179	0.136749	0	1	1	no	LOWDATA	2.55404	0.776846	-1.71708	0	1	1	no	NOTEST	0.503665	1.93933	1.94503	-1.65196	0.0985422	1	no
13103.m00532	LOC_Os03g05070.1	=	exostosin family domain containing protein, expressed	chr03:2374079-2579566	LOWDATA	1.52889	0.703055	-1.12077	0	1	1	no	NOTEST	0	0	0	0	1	1	no	LOWDATA	1.92308	0.293584	-2.71157	0	1	1	no	LOWDATA	0.252034	1.26125	2.32316	0	1	1	no
13103.m00533	LOC_Os03g05080.1	=	hypothetical protein	chr03:2374079-2579566	LOWDATA	1.62118	3.21651	0.988455	0	1	1	no	NOTEST	0.471339	0	0	0	1	1	no	LOWDATA	3.00194	3.56704	0.248832	0	1	1	no	NOTEST	1.2951	1.55834	0.266953	-0.149565	0.881108	1	no
13103.m30161	LOC_Os03g05225.1	=	expressed protein	chr03:2374079-2579566	LOWDATA	2.09127	2.92192	0.482541	0	1	1	no	LOWDATA	0.255144	0.739727	1.53568	0	1	1	no	LOWDATA	0.945166	0.0765255	-3.62655	0	1	1	no	LOWDATA	0.257267	1.1288	2.13345	0	1	1	no
13103.m00552	LOC_Os03g05270.2	=	RING finger and CHY zinc finger domain-containing protein 1, putative, expressed	chr03:2374079-2579566	LOWDATA	2.80993	6.82566	1.28044	0	1	1	no	LOWDATA	3.67956	0.813977	-2.17647	0	1	1	no	LOWDATA	1.79391	4.26711	1.25015	0	1	1	no	OK	7.15384	3.74145	-0.935119	1.08495	0.277946	0.951729	no
13103.m00555	LOC_Os03g05280.1	=	ras-related protein, putative, expressed	chr03:2374079-2579566	LOWDATA	12.0988	20.8451	0.784846	0	1	1	no	LOWDATA	9.87905	15.0427	0.606615	0	1	1	no	LOWDATA	9.17066	24.1688	1.39805	0	1	1	no	LOWDATA	17.4072	23.3165	0.421663	0	1	1	no
13103.m00558	LOC_Os03g05310.1	=	pheophorbide a oxygenase, chloroplast precursor, putative, expressed	chr03:2374079-2579566	LOWDATA	1.5669	18.1382	3.53305	0	1	1	no	LOWDATA	6.68604	3.05297	-1.13094	0	1	1	no	LOWDATA	0.443717	7.07741	3.99551	0	1	1	no	LOWDATA	3.14586	15.0045	2.25387	0	1	1	no
13103.m00561	LOC_Os03g05320.2	=	expressed protein	chr03:2580151-2604604	LOWDATA	8.91789	11.2591	0.336311	0	1	1	no	LOWDATA	17.5562	10.3836	-0.757675	0	1	1	no	OK	10.7939	8.8237	-0.290755	0.382031	0.702438	1	no	OK	11.6289	13.3534	0.199484	-0.308373	0.757798	1	no
13103.m00641	LOC_Os03g05900.1	=	expressed protein	chr03:2933803-2994509	LOWDATA	1.41752	10.1534	2.84053	0	1	1	no	LOWDATA	0.743035	4.04458	2.44449	0	1	1	no	LOWDATA	1.10478	9.55212	3.11207	0	1	1	no	LOWDATA	1.07611	5.06643	2.23515	0	1	1	no
13103.m00643	LOC_Os03g05910.1	=	expressed protein	chr03:2933803-2994509	LOWDATA	0.815829	3.07037	1.91207	0	1	1	no	NOTEST	0	0	0	0	1	1	no	LOWDATA	0.44695	3.37638	2.91729	0	1	1	no	OK	0	0	0	0	1	1	no
13103.m00644	LOC_Os03g05910.3	=	expressed protein	chr03:2933803-2994509	LOWDATA	0.374968	0.309078	-0.278795	0	1	1	no	LOWDATA	0.5361	0.206231	-1.37824	0	1	1	no	LOWDATA	1.08676	0.264473	-2.03884	0	1	1	no	OK	0.763056	6.42111	3.07296	-3.86426	0.000111428	0.00499149	yes
13103.m00654	LOC_Os03g05990.1	=	conserved hypothetical protein	chr03:2933803-2994509	LOWDATA	0.190548	0.665023	1.80325	0	1	1	no	NOTEST	0	0	0	0	1	1	no	LOWDATA	0.15197	1.06179	2.80464	0	1	1	no	NOTEST	0	0	0	0	1	1	no
13103.m00691	LOC_Os03g06330.1	=	tyrosine protein kinase domain containing protein, putative, expressed	chr03:3150508-3195710	LOWDATA	4.56918	16.6992	1.86977	0	1	1	no	NOTEST	2.92592	1.64586	-0.830047	0.265856	0.79035	1	no	OK	2.95027	25.6986	3.12278	-2.22822	0.0258661	0.244024	no	NOTEST	0	0	0	0	1	1	no
13103.m00692	LOC_Os03g06340.1	=	XS domain containing protein, expressed	chr03:3150508-3195710	LOWDATA	4.14619	3.31835	-0.321319	0	1	1	no	OK	4.49318	2.86197	-0.650728	0.525459	0.599264	0.841204	no	OK	4.60141	5.08391	0.143862	-0.135138	0.892502	1	no	NOTEST	0	0	0	0	1	1	no
13103.m00698	LOC_Os03g06370.2	=	PPR repeat domain containing protein, putative, expressed	chr03:3150508-3195710	LOWDATA	0.263449	0.250799	-0.0709917	0	1	1	no	LOWDATA	0.741942	0.449235	-0.723835	0	1	1	no	LOWDATA	0.167938	0.518797	1.62724	0	1	1	no	NOTEST	0	0	0	0	1	1	no
13103.m00697	LOC_Os03g06370.1	=	PPR repeat domain containing protein, putative, expressed	chr03:3150508-3195710	LOWDATA	0.594968	1.22992	1.04769	0	1	1	no	NOTEST	0	0	0	0	1	1	no	LOWDATA	0.261904	0.513947	0.972583	0	1	1	no	NOTEST	0	0	0	0	1	1	no
13103.m00699	LOC_Os03g06379.1	=	LYR motif containing protein, putative, expressed	chr03:3150508-3195710	LOWDATA	5.18074	7.24081	0.482992	0	1	1	no	NOTEST	2.83774	3.0154	0.0876069	-0.00547868	0.995629	1	no	OK	0.502646	3.78608	2.91309	-0.3328	0.739285	1	no	NOTEST	0	0	0	0	1	1	no
13103.m00724	LOC_Os03g06600.1	=	expressed protein	chr03:3313712-3318687	LOWDATA	0.0902949	0.764481	3.08176	0	1	1	no	NOTEST	0.0367375	0.416356	3.50249	-1.01636	0.309457	1	no	NOTEST	0.0230776	0.222307	3.26799	-0.888746	0.37414	1	no	LOWDATA	0.144044	0.319018	1.14712	0	1	1	no
13103.m00779	LOC_Os03g07080.1	=	endonuclease/exonuclease/phosphatase family domain containing protein, expressed	chr03:3615544-3621266	LOWDATA	10.5803	10.3093	-0.0374357	0	1	1	no	OK	14.7803	5.02759	-1.55573	2.7699	0.00560735	0.0681431	no	LOWDATA	10.9058	13.1581	0.270856	0	1	1	no	OK	11.7406	10.9856	-0.0958957	0.167496	0.86698	1	no
13103.m00951	LOC_Os03g08290.1	=	expressed protein	chr03:4221084-4227485	LOWDATA	0.486846	0.440315	-0.144931	0	1	1	no	NOTEST	0	0	0	0	1	1	no	LOWDATA	0.530013	0.525669	-0.0118718	0	1	1	no	NOTEST	0	0	0	0	1	1	no
13103.m00969	LOC_Os03g08430.2	=	SAC domain containing protein, putative, expressed	chr03:4326387-4407417	LOWDATA	13.6144	16.2125	0.251975	0	1	1	no	LOWDATA	7.99527	4.87556	-0.71358	0	1	1	no	LOWDATA	5.7064	15.2635	1.41943	0	1	1	no	OK	12.5275	11.564	-0.115461	0.114403	0.908918	1	no
13103.m00968	LOC_Os03g08430.1	=	SAC domain containing protein, putative, expressed	chr03:4326387-4407417	LOWDATA	3.88318	7.38083	0.926545	0	1	1	no	LOWDATA	10.6632	5.49932	-0.955318	0	1	1	no	LOWDATA	3.60938	5.54937	0.620573	0	1	1	no	OK	0.704104	5.91959	3.07164	-0.407953	0.683308	1	no
13103.m01066	LOC_Os03g09220.4	=	stage II sporulation protein E, putative, expressed	chr03:4806924-4828749	LOWDATA	1.8899	0.974071	-0.956212	0	1	1	no	LOWDATA	0.910467	0.188981	-2.26836	0	1	1	no	OK	1.17123	5.61766	2.26194	-1.37884	0.167943	0.687143	no	FAIL	1.94529	0	0	0	1	1	no
13103.m01079	LOC_Os03g09270.3	=	ubiquitin carboxyl-terminal hydrolase 26, putative, expressed	chr03:4835117-4843459	LOWDATA	0.033813	0.0915744	1.43737	0	1	1	no	NOTEST	0	0	0	0	1	1	no	NOTEST	0.257403	0	0	0	1	1	no	LOWDATA	0.249673	0.18869	-0.40402	0	1	1	no
13103.m01206	LOC_Os03g10760.1	=	hypothetical protein	chr03:5490324-5494040	LOWDATA	0.167206	0.321876	0.944877	0	1	1	no	LOWDATA	0.197891	0.682835	1.78683	0	1	1	no	NOTEST	0	1.26406	1e+300	1e+300	0.332082	1	no	LOWDATA	0.215681	1.04832	2.28111	0	1	1	no
13103.m12942	LOC_Os03g11360.2	=	leucine rich repeat containing protein, expressed	chr03:5852905-5882316	LOWDATA	3.25857	2.51995	-0.370847	0	1	1	no	LOWDATA	1.44306	1.03824	-0.474986	0	1	1	no	OK	2.22365	3.35712	0.594297	-0.0924842	0.926313	1	no	NOTEST	2.32656	3.50588	0.591581	-0.346766	0.728767	1	no
13103.m01281	LOC_Os03g11370.1	=	B3 DNA binding domain containing protein, expressed	chr03:5852905-5882316	LOWDATA	0.241832	0.12495	-0.952661	0	1	1	no	NOTEST	0.0292958	0.193257	2.72176	-0.759233	0.447713	1	no	NOTEST	0.228935	0.221025	-0.0507278	0.0164116	0.986906	1	no	NOTEST	0.320993	0.0643733	-2.31801	0.845019	0.3981	1	no
13103.m01283	LOC_Os03g11380.3	=	SNARE domain containing protein, putative, expressed	chr03:5852905-5882316	LOWDATA	1.41455	0.517834	-1.44978	0	1	1	no	LOWDATA	2.5881	0.324113	-2.99732	0	1	1	no	OK	6.24533	2.30165	-1.44011	0.889699	0.373628	0.915018	no	NOTEST	0	0	0	0	1	1	no
13103.m01282	LOC_Os03g11380.1	=	SNARE domain containing protein, putative, expressed	chr03:5852905-5882316	LOWDATA	5.03237	3.07275	-0.711704	0	1	1	no	LOWDATA	3.39666	1.14251	-1.57191	0	1	1	no	OK	0.400261	2.68852	2.7478	-0.277421	0.781457	1	no	LOWDATA	10.0591	2.68957	-1.90305	0	1	1	no
13103.m01284	LOC_Os03g11380.2	=	SNARE domain containing protein, putative, expressed	chr03:5852905-5882316	LOWDATA	1.24146	1.49938	0.272322	0	1	1	no	LOWDATA	0.860243	0.569676	-0.594602	0	1	1	no	LOWDATA	0.647716	0.513929	-0.333791	0	1	1	no	LOWDATA	0.489211	0.830287	0.763152	0	1	1	no
13103.m01285	LOC_Os03g11390.1	=	hypothetical protein	chr03:5852905-5882316	LOWDATA	0.137715	0.341542	1.31037	0	1	1	no	NOTEST	0.400391	0	0	0	1	1	no	NOTEST	0	0	0	0	1	1	no	NOTEST	0	0	0	0	1	1	no
13103.m01286	LOC_Os03g11400.1	=	targeting protein-related, putative, expressed	chr03:5852905-5882316	LOWDATA	1.03106	1.61193	0.644662	0	1	1	no	LOWDATA	6.4742	0.743034	-3.1232	0	1	1	no	LOWDATA	4.04104	1.92914	-1.06677	0	1	1	no	OK	4.15828	4.40754	0.0839881	-0.0573269	0.954285	1	no
13103.m01288	LOC_Os03g11410.1	=	mitochondrial-processing peptidase subunit, mitochondrial precursor, putative, expressed	chr03:5852905-5882316	LOWDATA	32.1522	39.1412	0.283768	0	1	1	no	LOWDATA	38.4485	28.3979	-0.437142	0	1	1	no	OK	34.909	37.352	0.0975869	-0.189774	0.849486	1	no	OK	35.6996	44.0974	0.304784	-0.686469	0.492417	1	no
13103.m01300	LOC_Os03g11520.1	=	expressed protein	chr03:5965642-5987828	LOWDATA	3.16192	4.63279	0.55108	0	1	1	no	OK	3.57678	2.25599	-0.664898	0.486962	0.626285	0.856719	no	OK	2.47171	4.42081	0.838802	-0.595296	0.551646	1	no	OK	2.25126	3.80955	0.758885	-0.262823	0.792687	1	no
13103.m01302	LOC_Os03g11540.1	=	RPA1B - Putative single-stranded DNA binding complex subunit 1, expressed	chr03:5965642-5987828	LOWDATA	5.55947	1.03408	-2.42659	0	1	1	no	OK	8.74809	0.988707	-3.14535	0.812097	0.416736	0.724205	no	OK	8.52622	2.16148	-1.97988	1.71623	0.0861203	0.496492	no	OK	11.7916	2.92454	-2.01148	1.21396	0.224763	0.883146	no
13103.m01358	LOC_Os03g11990.2	=	bolA, putative, expressed	chr03:6279170-6298602	LOWDATA	9.79304	13.4488	0.457648	0	1	1	no	OK	9.34896	10.8811	0.218943	-0.269215	0.787764	0.936987	no	LOWDATA	17.7211	24.5241	0.46873	0	1	1	no	LOWDATA	10.7979	9.88406	-0.12758	0	1	1	no
13103.m01382	LOC_Os03g12140.3	=	glucan endo-1,3-beta-glucosidase precursor, putative, expressed	chr03:6368444-6372705	LOWDATA	0.247009	0.221942	-0.15438	0	1	1	no	NOTEST	0.329233	0	0	0	1	1	no	NOTEST	0	0	0	0	1	1	no	NOTEST	0.612417	0	0	0	1	1	no
13103.m01405	LOC_Os03g12320.1	=	UDP-3-O- N-acetylglucosamine deacetylase, putative, expressed	chr03:6492907-6497974	LOWDATA	2.18133	4.86885	1.15837	0	1	1	no	NOTEST	1.48257	1.51678	0.0329151	-0.0226755	0.981909	1	no	OK	1.75378	3.06955	0.807554	-0.785007	0.432449	0.948796	no	NOTEST	3.10594	2.59044	-0.261831	0.206778	0.836183	1	no
13103.m01473	LOC_Os03g12820.2	=	ATP8, putative, expressed	chr03:6862022-6897426	LOWDATA	1.40174	8.4333	2.58888	0	1	1	no	NOTEST	0	2.76684	1e+300	1e+300	0.00154648	1	no	OK	0	0	0	0	1	1	no	OK	0.75274	7.90952	3.39337	-0.708509	0.478629	1	no
13103.m01472	LOC_Os03g12820.1	=	ATP8, putative, expressed	chr03:6862022-6897426	LOWDATA	5.10162	42.7476	3.06682	0	1	1	no	OK	4.88549	4.45534	-0.132969	0.169498	0.865405	0.971681	no	LOWDATA	4.30038	30.6247	2.83216	0	1	1	no	LOWDATA	4.35763	25.6806	2.55906	0	1	1	no
13103.m01515	LOC_Os03g13100.1	=	ariadne-1, putative, expressed	chr03:7073638-7078258	LOWDATA	6.16538	7.41848	0.266935	0	1	1	no	OK	6.3926	3.39577	-0.912664	1.03584	0.300275	0.629584	no	OK	6.72644	8.4024	0.320957	-0.443242	0.657591	1	no	OK	7.33927	7.94414	0.114254	-0.16892	0.86586	1	no
13103.m01527	LOC_Os03g13180.1	=	peroxidase precursor, putative, expressed	chr03:7106126-7129396	LOWDATA	0.810821	1.66854	1.04113	0	1	1	no	LOWDATA	0.399596	0.0650874	-2.61809	0	1	1	no	NOTEST	0.303595	0.474551	0.644418	-0.239393	0.810801	1	no	NOTEST	0.243243	0.425523	0.806839	-0.908917	0.363394	1	no
13103.m01620	LOC_Os03g13940.1	=	transposon protein, putative, unclassified	chr03:7558110-7596385	LOWDATA	0.59693	0.925263	0.632302	0	1	1	no	NOTEST	0.433876	0.636334	0.552501	-0.277479	0.781412	1	no	NOTEST	0	0.363883	1e+300	1e+300	0.0368191	1	no	NOTEST	0	0	0	0	1	1	no
13103.m01628	LOC_Os03g13976.1	=	expressed protein	chr03:7558110-7596385	LOWDATA	0.485413	0.132095	-1.87764	0	1	1	no	NOTEST	0	0	0	0	1	1	no	NOTEST	0.0626714	0	-1e+300	-1e+300	0.0786496	1	no	NOTEST	0	0	0	0	1	1	no
13103.m01633	LOC_Os03g14000.2	=	acyl CoA binding protein, putative, expressed	chr03:7558110-7596385	LOWDATA	0.766532	0.777965	0.0213585	0	1	1	no	NOTEST	2.44119	0	-1e+300	-1e+300	0.0937132	1	no	OK	0	2.39062	1e+300	1e+300	0.296053	0.853023	no	NOTEST	1.74328	1.24687	-0.483492	0.0933894	0.925594	1	no
13103.m01632	LOC_Os03g14000.1	=	acyl CoA binding protein, putative, expressed	chr03:7558110-7596385	LOWDATA	12.9106	18.2402	0.498562	0	1	1	no	OK	8.50825	10.2002	0.261659	-0.287924	0.773405	0.93046	no	LOWDATA	10.4685	17.4749	0.739228	0	1	1	no	OK	11.7958	17.6126	0.578341	-0.749875	0.45333	1	no
13103.m01673	LOC_Os03g14290.1	=	expressed protein	chr03:7765641-7783774	LOWDATA	4.52344	5.39724	0.2548	0	1	1	no	LOWDATA	7.60974	6.43882	-0.24105	0	1	1	no	OK	2.86137	4.74239	0.728905	-0.630959	0.528068	0.994052	no	LOWDATA	3.93272	7.03299	0.838611	0	1	1	no
13103.m01717	LOC_Os03g14690.1	=	vacuolar ATP synthase 98 kDa subunit, putative, expressed	chr03:7981320-7988375	LOWDATA	9.71932	9.3814	-0.0510526	0	1	1	no	OK	15.806	8.8109	-0.843114	1.5656	0.117443	0.407402	no	OK	4.31879	6.15454	0.511024	-0.765935	0.443715	0.955054	no	OK	9.97168	12.5227	0.32864	-0.582231	0.560411	1	no
13103.m01833	LOC_Os03g15650.2	=	vacuolar sorting protein, putative, expressed	chr03:8628698-8634103	LOWDATA	0.236828	0.216439	-0.129874	0	1	1	no	NOTEST	0.677582	0.085287	-2.99	0.102527	0.918339	1	no	LOWDATA	0.0801346	0.15649	0.965573	0	1	1	no	NOTEST	0	0	0	0	1	1	no
13103.m01985	LOC_Os03g16700.2	=	initiator-binding protein, putative, expressed	chr03:9246258-9251546	LOWDATA	0.159084	0.231413	0.540679	0	1	1	no	NOTEST	0.600083	0	0	0	1	1	no	LOWDATA	0.743561	0.305086	-1.28523	0	1	1	no	LOWDATA	0.467527	0.382296	-0.290358	0	1	1	no
13103.m12873	LOC_Os03g17174.2	=	PsbP, putative, expressed	chr03:9554266-9565462	LOWDATA	0.383829	1.29287	1.75204	0	1	1	no	LOWDATA	0.841478	0.468282	-0.845548	0	1	1	no	LOWDATA	0.41664	0.855783	1.03844	0	1	1	no	LOWDATA	0.968709	0.609906	-0.667477	0	1	1	no
13103.m02057	LOC_Os03g17210.2	=	expressed protein	chr03:9590770-9608420	LOWDATA	1.46325	1.31924	-0.14947	0	1	1	no	NOTEST	1.37425	0	-1e+300	-1e+300	0.383788	1	no	NOTEST	0	0	0	0	1	1	no	LOWDATA	1.28069	0.658404	-0.959878	0	1	1	no
13103.m02061	LOC_Os03g17250.1	=	ankyrin repeat-containing protein, putative, expressed	chr03:9609052-9612236	LOWDATA	0.206483	0.236651	0.196739	0	1	1	no	NOTEST	0	0	0	0	1	1	no	NOTEST	0	0.330676	1e+300	1e+300	0.0598929	1	no	NOTEST	0	0	0	0	1	1	no
13103.m02094	LOC_Os03g17540.3	=	TBC domain containing protein, expressed	chr03:9742436-9767626	LOWDATA	0.647225	1.99873	1.62675	0	1	1	no	NOTEST	1.13668	0.197597	-2.52419	0.231889	0.816624	1	no	NOTEST	0.255368	0.770876	1.59392	-0.146956	0.883167	1	no	NOTEST	0	0.639465	1e+300	1e+300	0.138857	1	no
13103.m02112	LOC_Os03g17670.1	=	hypothetical protein	chr03:9782721-9827834	LOWDATA	0.704518	27.4354	5.28326	0	1	1	no	NOTEST	0.249592	0.249699	0.000617689	-9.53549e-05	0.999924	1	no	LOWDATA	1.03462	21.2299	4.35893	0	1	1	no	LOWDATA	0.108731	8.14262	6.22666	0	1	1	no
13103.m02140	LOC_Os03g17920.3	=	RNA pseudouridine synthase, putative, expressed	chr03:9980174-9985690	LOWDATA	0.050507	0.0426438	-0.244147	0	1	1	no	LOWDATA	0.0840066	0.038864	-1.11207	0	1	1	no	NOTEST	0	0	0	0	1	1	no	NOTEST	0	0	0	0	1	1	no
13103.m02145	LOC_Os03g17930.3	=	alpha-taxilin, putative, expressed	chr03:9985977-9992261	LOWDATA	2.8569	2.91195	0.0275347	0	1	1	no	NOTEST	0.0604428	0.473514	2.96976	-0.471274	0.637445	1	no	NOTEST	0	1.63309	1e+300	1e+300	0.0303865	1	no	NOTEST	0	2.80665	1e+300	1e+300	0.0132631	1	no
13103.m02152	LOC_Os03g17980.1	=	CAMK_KIN1/SNF1/Nim1_like_AMPKh.2 - CAMK includes calcium/calmodulin depedent protein kinases, expressed	chr03:10005322-10010960	LOWDATA	0.430791	0.309656	-0.476321	0	1	1	no	LOWDATA	0.518274	0.101492	-2.35234	0	1	1	no	LOWDATA	0.14339	0.20202	0.494553	0	1	1	no	NOTEST	0	0	0	0	1	1	no
13103.m02192	LOC_Os03g18310.1	=	6PF-2-K/Fru-2,6-P2ASE liver isozyme, putative, expressed	chr03:10257510-10294596	LOWDATA	4.07036	3.37952	-0.268334	0	1	1	no	OK	4.32989	1.17886	-1.87694	1.81685	0.0692398	0.309025	no	LOWDATA	4.28348	5.88812	0.459022	0	1	1	no	OK	5.79828	6.02849	0.05617	-0.0643473	0.948694	1	no
13103.m02196	LOC_Os03g18330.1	=	transcription factor like protein, putative	chr03:10257510-10294596	LOWDATA	0.16032	0.132534	-0.274589	0	1	1	no	NOTEST	0	0	0	0	1	1	no	NOTEST	0	0.0488515	1e+300	1e+300	0.158655	1	no	NOTEST	0	0	0	0	1	1	no
13103.m02199	LOC_Os03g18360.1	=	BTBT1 - Bric-a-Brac, Tramtrack, Broad Complex BTB domain with tetratricopeptide repeats, expressed	chr03:10257510-10294596	LOWDATA	2.45565	4.30017	0.808288	0	1	1	no	NOTEST	2.21112	1.9542	-0.178196	0.142648	0.886568	1	no	OK	1.47981	2.80871	0.924498	-0.419619	0.674764	1	no	LOWDATA	1.93304	3.51374	0.862137	0	1	1	no
13103.m02233	LOC_Os03g18640.1	=	laccase precursor protein, putative, expressed	chr03:10441978-10444939	LOWDATA	0.346382	0.319098	-0.118364	0	1	1	no	NOTEST	0	0	0	0	1	1	no	NOTEST	0.146005	0	0	0	1	1	no	NOTEST	0.495197	1.10037	1.15191	-0.704459	0.481147	1	no
13103.m02281	LOC_Os03g19070.1	=	long cell-linked locus protein, putative, expressed	chr03:10671498-10712252	LOWDATA	9.94032	5.21165	-0.931553	0	1	1	no	LOWDATA	5.18068	9.78517	0.917457	0	1	1	no	LOWDATA	1.9441	3.11908	0.682019	0	1	1	no	LOWDATA	9.17041	5.77139	-0.668067	0	1	1	no
13103.m02392	LOC_Os03g19960.2	=	ATP-dependent RNA helicase, putative, expressed	chr03:11236432-11268833	LOWDATA	1.82701	3.27791	0.843287	0	1	1	no	LOWDATA	2.99498	1.36998	-1.12839	0	1	1	no	LOWDATA	0.828959	1.06806	0.36562	0	1	1	no	NOTEST	1.03201	0.57115	-0.853522	0.077509	0.938219	1	no
13103.m02393	LOC_Os03g19960.1	=	ATP-dependent RNA helicase, putative, expressed	chr03:11236432-11268833	LOWDATA	8.479	10.9225	0.365334	0	1	1	no	OK	8.31511	7.25713	-0.196335	0.211212	0.832721	0.958452	no	LOWDATA	11.0863	13.3016	0.262821	0	1	1	no	LOWDATA	11.3095	12.8766	0.187213	0	1	1	no
13103.m02395	LOC_Os03g19980.1	=	tetratricopeptide-like helical, putative, expressed	chr03:11236432-11268833	LOWDATA	0.283759	0.297235	0.0669352	0	1	1	no	NOTEST	0.420083	0.731128	0.799448	-0.160071	0.872826	1	no	LOWDATA	0.176354	0.256863	0.542523	0	1	1	no	NOTEST	0	0.247996	1e+300	1e+300	0.413402	1	no
13103.m02397	LOC_Os03g19990.1	=	WD40-like Beta Propeller Repeat family protein, expressed	chr03:11236432-11268833	LOWDATA	4.74908	1.30193	-1.86699	0	1	1	no	NOTEST	2.64787	0.476995	-2.47279	0.930766	0.351974	1	no	OK	1.93472	0.432853	-2.16017	0.589021	0.555847	1	no	LOWDATA	1.46174	1.21453	-0.267292	0	1	1	no
13103.m02544	LOC_Os03g21240.1	=	myb-like DNA-binding domain containing protein, expressed	chr03:12124959-12130061	LOWDATA	9.41536	12.3744	0.394265	0	1	1	no	OK	9.28237	4.97009	-0.901221	1.53348	0.125158	0.420107	no	OK	8.25381	13.7568	0.737014	-1.21003	0.226266	0.773656	no	LOWDATA	8.67611	11.6464	0.424768	0	1	1	no
13103.m12977	LOC_Os03g22010.4	=	peroxidase precursor, putative, expressed	chr03:12610518-12615884	LOWDATA	1.03301	0.369182	-1.48445	0	1	1	no	LOWDATA	1.95601	0.646319	-1.5976	0	1	1	no	LOWDATA	0.294154	0.714622	1.28061	0	1	1	no	LOWDATA	1.10179	1.55182	0.494107	0	1	1	no
13103.m02690	LOC_Os03g22380.1	=	RNA recognition motif containing protein, expressed	chr03:12813297-12833768	LOWDATA	21.4313	25.0722	0.226369	0	1	1	no	LOWDATA	23.2857	17.0378	-0.450705	0	1	1	no	OK	20.8484	25.7543	0.304878	-0.559083	0.576105	1	no	LOWDATA	27.1351	23.4017	-0.213542	0	1	1	no
13103.m02696	LOC_Os03g22410.1	=	DUF567 domain containing protein, putative, expressed	chr03:12813297-12833768	LOWDATA	1.20856	0.630571	-0.938564	0	1	1	no	LOWDATA	0.383315	0.367338	-0.06142	0	1	1	no	LOWDATA	0.771564	0.45817	-0.751903	0	1	1	no	NOTEST	0.792251	2.05686	1.37641	-0.804411	0.42116	1	no
13103.m02761	LOC_Os03g22870.2	=	SAC3/GANP family protein, putative, expressed	chr03:13216741-13246616	LOWDATA	0.209205	0.262589	0.327892	0	1	1	no	NOTEST	0.18565	0.0789948	-1.23275	0.0516184	0.958833	1	no	LOWDATA	0.0332336	0.150376	2.17786	0	1	1	no	NOTEST	0	0	0	0	1	1	no
13103.m02976	LOC_Os03g25270.2	=	pyrrolidone-carboxylate peptidase, putative, expressed	chr03:14430317-14434121	LOWDATA	0.927091	0.30217	-1.61735	0	1	1	no	NOTEST	2.51627	1.21612	-1.04901	0.455741	0.648576	1	no	OK	1.45983	7.85724	2.42823	-0.38168	0.702699	1	no	OK	10.919	2.09648	-2.38079	3.47201	0.000516576	0.0160362	yes
13103.m02992	LOC_Os03g25380.1	=	pentatricopeptide, putative, expressed	chr03:14511167-14517236	LOWDATA	0.485177	0.577857	0.252202	0	1	1	no	NOTEST	0.662188	0.575085	-0.203467	0.00659861	0.994735	1	no	NOTEST	0.959302	0.514581	-0.898589	0.253169	0.800137	1	no	NOTEST	0.936574	0.90772	-0.0451462	0.00980493	0.992177	1	no
13103.m03001	LOC_Os03g25440.1	=	expressed protein	chr03:14532463-14571260	LOWDATA	11.667	16.1881	0.472496	0	1	1	no	OK	0	0	0	0	1	1	no	LOWDATA	0	0	-1e+300	0	1	1	no	LOWDATA	0	0	0	0	1	1	no
13103.m03002	LOC_Os03g25450.1	=	h/ACA ribonucleoprotein complex subunit 4, putative, expressed	chr03:14532463-14571260	LOWDATA	3.21712	1.59002	-1.01672	0	1	1	no	NOTEST	0	0	0	0	1	1	no	LOWDATA	0	0	-1e+300	0	1	1	no	LOWDATA	0	0	0	0	1	1	no
13103.m03008	LOC_Os03g25490.1	=	cytochrome P450 72A1, putative, expressed	chr03:14532463-14571260	LOWDATA	0.0508031	0.0711642	0.486235	0	1	1	no	NOTEST	0	0	0	0	1	1	no	LOWDATA	0	0	-1e+300	0	1	1	no	LOWDATA	0	0	0	0	1	1	no
13103.m03007	LOC_Os03g25490.2	=	cytochrome P450 72A1, putative, expressed	chr03:14532463-14571260	LOWDATA	0.049229	0.371379	2.91531	0	1	1	no	NOTEST	0	0	0	0	1	1	no	LOWDATA	0	0	-1e+300	0	1	1	no	LOWDATA	0	0	0	0	1	1	no
13103.m03115	LOC_Os03g26620.1	=	3-ketoacyl-CoA synthase, putative, expressed	chr03:15148585-15209371	LOWDATA	0.444283	0.550591	0.309504	0	1	1	no	LOWDATA	0.363841	0.214978	-0.759119	0	1	1	no	LOWDATA	0.380251	0.475422	0.322258	0	1	1	no	LOWDATA	0.430049	1.06813	1.31251	0	1	1	no
13103.m03119	LOC_Os03g26650.2	=	heavy metal-associated domain containing protein, expressed	chr03:15212784-15231476	LOWDATA	0.66121	0.351973	-0.909643	0	1	1	no	NOTEST	0.468513	0	0	0	1	1	no	NOTEST	0	0	0	0	1	1	no	NOTEST	0	0	0	0	1	1	no
13103.m03118	LOC_Os03g26650.1	=	heavy metal-associated domain containing protein, expressed	chr03:15212784-15231476	LOWDATA	2.23576	0.952083	-1.23161	0	1	1	no	NOTEST	0.25714	1.26007	2.29288	-0.213815	0.830691	1	no	OK	1.9325	1.21267	-0.67228	0.120799	0.90385	1	no	NOTEST	2.65928	1.61379	-0.720584	0.191996	0.847745	1	no
13103.m03192	LOC_Os03g27320.2	=	steroid binding protein, putative, expressed	chr03:15602476-15664379	LOWDATA	3.66677	3.93639	0.102363	0	1	1	no	OK	6.96798	3.98448	-0.806349	0.547039	0.584352	0.83228	no	LOWDATA	5.37174	3.21535	-0.740413	0	1	1	no	OK	5.88926	10.428	0.824311	-0.655093	0.512408	1	no
13103.m03193	LOC_Os03g27320.3	=	steroid binding protein, putative, expressed	chr03:15602476-15664379	LOWDATA	1.26495	1.69855	0.425229	0	1	1	no	NOTEST	1.98461	0	0	0	1	1	no	LOWDATA	1.07404	2.31801	1.10983	0	1	1	no	LOWDATA	1.59903	3.21693	1.00849	0	1	1	no
13103.m03199	LOC_Os03g27350.3	=	cysteine protease ATG4, putative, expressed	chr03:15602476-15664379	LOWDATA	4.20992	3.25029	-0.373222	0	1	1	no	OK	5.48649	2.06778	-1.4078	1.86355	0.0623846	0.293454	no	LOWDATA	3.56006	3.5841	0.00970805	0	1	1	no	OK	5.00052	3.54379	-0.496786	0.780712	0.434972	1	no
13103.m03268	LOC_Os03g27960.2	=	sodium/calcium exchanger protein, putative, expressed	chr03:16049879-16063816	LOWDATA	0.550465	1.0795	0.971645	0	1	1	no	NOTEST	0.581582	0.922041	0.664847	-0.480457	0.630903	1	no	NOTEST	0.277099	0	0	0	1	1	no	NOTEST	0.315981	0	0	0	1	1	no
13103.m03297	LOC_Os03g28250.1	=	hypothetical protein	chr03:16245722-16246244	LOWDATA	2.13331	1.5544	-0.456733	0	1	1	no	NOTEST	2.32425	0	0	0	1	1	no	OK	4.62056	1.64844	-1.48697	0.580539	0.561552	1	no	NOTEST	2.19747	1.36935	-0.682353	0.105697	0.915822	1	no
13103.m03329	LOC_Os03g28990.2	=	zinc finger family protein, putative, expressed	chr03:16456162-16458095	LOWDATA	0.237388	0.385744	0.700395	0	1	1	no	NOTEST	0	0	0	0	1	1	no	NOTEST	0	0	0	0	1	1	no	NOTEST	0	0	0	0	1	1	no
13103.m03351	LOC_Os03g29190.2	=	PDI, putative, expressed	chr03:16585163-16630725	LOWDATA	33.06	28.6775	-0.20517	0	1	1	no	OK	10.554	5.29938	-0.993889	1.61399	0.106529	0.390328	no	LOWDATA	24.0803	26.7744	0.152997	0	1	1	no	LOWDATA	16.8868	29.9855	0.828368	0	1	1	no
13103.m03380	LOC_Os03g29380.1	=	conserved hypothetical protein	chr03:16728080-16730625	LOWDATA	0.174541	0.168714	-0.048984	0	1	1	no	NOTEST	0.105984	0	-1e+300	-1e+300	0.181608	1	no	NOTEST	0.175931	0	0	0	1	1	no	NOTEST	0	0	0	0	1	1	no
13103.m12984	LOC_Os03g29750.2	=	expressed protein	chr03:16947399-16953606	LOWDATA	0.202247	0.181843	-0.153421	0	1	1	no	LOWDATA	0.355127	0.136373	-1.38077	0	1	1	no	NOTEST	0	0	0	0	1	1	no	NOTEST	0	0	0	0	1	1	no
13103.m03460	LOC_Os03g30200.2	=	mitochondrial import inner membrane translocase subunit Tim17, putative, expressed	chr03:17235390-17239891	LOWDATA	0.0869455	0.751402	3.1114	0	1	1	no	NOTEST	0.916107	0	0	0	1	1	no	LOWDATA	0.499078	0.564909	0.178754	0	1	1	no	NOTEST	0.130859	0	0	0	1	1	no
13103.m03628	LOC_Os03g31740.1	=	ZCF37, putative, expressed	chr03:18117427-18176816	LOWDATA	0.933314	1.94646	1.06042	0	1	1	no	NOTEST	0.871026	2.11705	1.28126	-0.495858	0.619994	1	no	NOTEST	0	0	0	0	1	1	no	NOTEST	0	0	0	0	1	1	no
13103.m03877	LOC_Os03g34280.1	=	expressed protein	chr03:19482720-19530225	LOWDATA	4.11528	5.93606	0.528514	0	1	1	no	LOWDATA	4.32406	3.43317	-0.332846	0	1	1	no	LOWDATA	2.83404	3.3311	0.23314	0	1	1	no	NOTEST	2.58449	2.51414	-0.0398121	0.037055	0.970441	1	no
13103.m03878	LOC_Os03g34280.2	=	expressed protein	chr03:19482720-19530225	LOWDATA	0.561843	0.476824	-0.23671	0	1	1	no	LOWDATA	0.655467	0.761927	0.217129	0	1	1	no	NOTEST	0	0.595514	1e+300	1e+300	0.386632	1	no	NOTEST	0	0	0	0	1	1	no
13103.m03884	LOC_Os03g34310.4	=	expressed protein	chr03:19482720-19530225	LOWDATA	0.104681	0.346286	1.72597	0	1	1	no	NOTEST	0.719752	0	0	0	1	1	no	NOTEST	0	0	0	0	1	1	no	NOTEST	0.537599	0	0	0	1	1	no
13103.m03886	LOC_Os03g34310.1	=	expressed protein	chr03:19482720-19530225	LOWDATA	0.842718	0.712231	-0.242706	0	1	1	no	NOTEST	0	0	0	0	1	1	no	NOTEST	0	0	0	0	1	1	no	NOTEST	0	0	0	0	1	1	no
13103.m04204	LOC_Os03g38730.2	=	peroxisomal membrane protein, putative, expressed	chr03:21496485-21499125	LOWDATA	0.126872	0.454716	1.84159	0	1	1	no	LOWDATA	0.858411	0.282596	-1.60293	0	1	1	no	LOWDATA	0.297041	0.1361	-1.12599	0	1	1	no	LOWDATA	0.160639	0.230414	0.520409	0	1	1	no
13103.m04203	LOC_Os03g38730.3	=	peroxisomal membrane protein, putative, expressed	chr03:21496485-21499125	LOWDATA	1.63305	0.707175	-1.20743	0	1	1	no	LOWDATA	3.24412	2.79383	-0.215585	0	1	1	no	LOWDATA	2.39768	0.968603	-1.30766	0	1	1	no	NOTEST	0	0	0	0	1	1	no
13103.m04238	LOC_Os03g39010.1	=	possible lysine decarboxylase domain containing protein, expressed	chr03:21663723-21691672	LOWDATA	1.05616	1.08492	0.0387521	0	1	1	no	LOWDATA	1.29638	1.07648	-0.268165	0	1	1	no	LOWDATA	0.764953	0.612224	-0.321311	0	1	1	no	LOWDATA	0.431733	0.884866	1.03532	0	1	1	no
13103.m04271	LOC_Os03g39380.3	=	expressed protein	chr03:21873358-22028310	LOWDATA	3.81418	2.05774	-0.890314	0	1	1	no	LOWDATA	3.40044	5.71562	0.749187	0	1	1	no	LOWDATA	1.73481	1.41253	-0.296493	0	1	1	no	LOWDATA	2.85197	3.98696	0.483332	0	1	1	no
13103.m04268	LOC_Os03g39380.1	=	expressed protein	chr03:21873358-22028310	LOWDATA	3.44522	4.64371	0.430684	0	1	1	no	LOWDATA	1.82729	0.438747	-2.05824	0	1	1	no	LOWDATA	1.9658	2.30077	0.227001	0	1	1	no	LOWDATA	1.89074	1.95005	0.0445611	0	1	1	no
13103.m04543	LOC_Os03g42220.1	=	T-complex protein, putative, expressed	chr03:23483664-23488915	LOWDATA	16.7651	15.4636	-0.116591	0	1	1	no	OK	19.677	11.5534	-0.768197	1.32965	0.183632	0.503913	no	LOWDATA	17.6356	19.766	0.16453	0	1	1	no	OK	21.9693	19.2609	-0.189808	0.378202	0.70528	1	no
13103.m04558	LOC_Os03g42350.1	=	ankyrin, putative, expressed	chr03:23543482-23564628	LOWDATA	0.496241	0.757964	0.611089	0	1	1	no	NOTEST	0	0	0	0	1	1	no	NOTEST	0.826006	0.833825	0.0135914	-0.00269668	0.997848	1	no	NOTEST	1.20049	1.10502	-0.119547	0.0498709	0.960225	1	no
13103.m04602	LOC_Os03g42810.1	=	endonuclease/exonuclease/phosphatase family domain containing protein, expressed	chr03:23848143-23850829	LOWDATA	5.11089	11.1455	1.12482	0	1	1	no	NOTEST	2.4979	1.85183	-0.431765	0.420837	0.673874	1	no	OK	3.62955	12.7265	1.80997	-2.65637	0.00789866	0.116528	no	OK	3.12354	5.39479	0.788385	-1.01603	0.309614	0.986426	no
13103.m04782	LOC_Os03g44440.1	=	cyclic nucleotide-gated ion channel, putative, expressed	chr03:25001743-25008480	LOWDATA	0.106326	0.137059	0.366307	0	1	1	no	LOWDATA	0.0885348	0.0791579	-0.161511	0	1	1	no	LOWDATA	0.0816946	0.0899384	0.138696	0	1	1	no	NOTEST	0.0265845	0.209636	2.97923	-0.997497	0.318523	1	no
13103.m04787	LOC_Os03g44484.1	=	DNA-directed RNA polymerase II subunit RPB2, putative, expressed	chr03:25031602-25064966	LOWDATA	4.85456	8.61103	0.826844	0	1	1	no	LOWDATA	4.35463	2.46013	-0.823816	0	1	1	no	OK	7.68878	11.7551	0.612456	-0.606687	0.544059	1	no	OK	8.57772	9.18696	0.0989936	-0.100101	0.920265	1	no
13103.m04790	LOC_Os03g44520.1	=	expressed protein	chr03:25031602-25064966	LOWDATA	6.46843	5.34736	-0.274589	0	1	1	no	OK	4.13373	5.19447	0.329532	-0.395944	0.692146	0.892103	no	OK	5.48041	6.42638	0.229724	-0.2876	0.773653	1	no	OK	6.76124	8.03573	0.249142	-0.381206	0.703051	1	no
13103.m04881	LOC_Os03g45320.1	=	dehydrogenase, putative, expressed	chr03:25584214-25614312	LOWDATA	13.9414	12.6967	-0.134928	0	1	1	no	LOWDATA	25.7081	7.32201	-1.81191	0	1	1	no	OK	20.3876	16.2222	-0.329724	0.552692	0.580475	1	no	OK	24.3934	17.3145	-0.494513	0.939166	0.347646	1	no
13103.m04888	LOC_Os03g45370.1	=	sodium/calcium exchanger protein, putative, expressed	chr03:25584214-25614312	LOWDATA	8.14754	14.5143	0.833042	0	1	1	no	LOWDATA	15.532	23.9844	0.62686	0	1	1	no	LOWDATA	7.56793	8.76371	0.211644	0	1	1	no	LOWDATA	10.2787	17.1854	0.741528	0	1	1	no
13103.m04943	LOC_Os03g45980.1	=	expressed protein	chr03:25970240-26033382	LOWDATA	0.758259	0.897524	0.24326	0	1	1	no	NOTEST	0	0	0	0	1	1	no	NOTEST	0.672945	0.866259	0.36431	-0.220066	0.82582	1	no	LOWDATA	0.0686216	0.440373	2.68199	0	1	1	no
13103.m04945	LOC_Os03g46010.1	=	hypothetical protein	chr03:25970240-26033382	LOWDATA	850.371	875.72	0.0423786	0	1	1	no	OK	2556.34	1815.09	-0.494037	1.20477	0.228292	0.557433	no	OK	893.52	808.451	-0.144341	0.34228	0.73214	1	no	LOWDATA	594.798	639.981	0.105629	0	1	1	no
13103.m04947	LOC_Os03g46040.1	=	expressed protein	chr03:25970240-26033382	LOWDATA	0.844951	1.47937	0.808044	0	1	1	no	NOTEST	0	0	0	0	1	1	no	NOTEST	0	0	0	0	1	1	no	NOTEST	0	0	0	0	1	1	no
13103.m04985	LOC_Os03g46330.1	=	pattern formation protein EMB30, putative, expressed	chr03:26198762-26221025	LOWDATA	0.082894	0.0555959	-0.576289	0	1	1	no	NOTEST	0	0	0	0	1	1	no	NOTEST	0.0277963	0	0	0	1	1	no	NOTEST	0	0	0	0	1	1	no
13103.m05237	LOC_Os03g48540.1	=	expressed protein	chr03:27661949-27668587	LOWDATA	3.72693	8.79432	1.23858	0	1	1	no	NOTEST	2.09085	0.737305	-1.50376	2.40505	0.0161701	1	no	LOWDATA	3.55149	7.06837	0.992955	0	1	1	no	LOWDATA	1.94501	4.75297	1.28905	0	1	1	no
13103.m05344	LOC_Os03g49380.2	=	lipoxygenase, putative, expressed	chr03:28099956-28106354	LOWDATA	1.06547	2.42679	1.18756	0	1	1	no	LOWDATA	1.08905	0.275669	-1.98205	0	1	1	no	LOWDATA	0.0976401	0.614457	2.65377	0	1	1	no	NOTEST	0	0	0	0	1	1	no
13103.m05401	LOC_Os03g49700.1	=	SNARE associated Golgi protein, putative, expressed	chr03:28290195-28293344	LOWDATA	6.00631	7.64929	0.348848	0	1	1	no	OK	4.74913	2.55379	-0.895025	1.10666	0.268442	0.599545	no	LOWDATA	4.82637	5.37826	0.156202	0	1	1	no	OK	3.21608	5.315	0.724766	-0.919435	0.357868	1	no
13103.m05428	LOC_Os03g49940.1	=	integral membrane protein, putative, expressed	chr03:28441638-28476745	LOWDATA	4.38127	9.35338	1.09414	0	1	1	no	OK	9.38325	0.692841	-3.75949	4.86398	1.15051e-06	0.000108052	yes	LOWDATA	1.62205	12.5622	2.9532	0	1	1	no	LOWDATA	4.93057	10.4045	1.07738	0	1	1	no
13103.m05469	LOC_Os03g50290.3	=	14-3-3 protein, putative, expressed	chr03:28644132-28663607	LOWDATA	6.00083	5.14936	-0.220767	0	1	1	no	OK	4.41086	4.46384	0.0172273	-0.00729112	0.994183	1	no	LOWDATA	4.6073	4.87447	0.0813238	0	1	1	no	LOWDATA	5.9902	5.71559	-0.0677018	0	1	1	no
13103.m05467	LOC_Os03g50290.1	=	14-3-3 protein, putative, expressed	chr03:28644132-28663607	LOWDATA	70.9545	75.369	0.0870786	0	1	1	no	OK	52.2945	46.3006	-0.175628	0.38568	0.699733	0.895977	no	OK	31.9067	85.5904	1.42359	-4.49599	6.92476e-06	0.000576249	yes	LOWDATA	73.0206	64.3812	-0.181665	0	1	1	no
13103.m05468	LOC_Os03g50290.2	=	14-3-3 protein, putative, expressed	chr03:28644132-28663607	LOWDATA	18.8365	20.5001	0.122098	0	1	1	no	OK	24.4398	11.3806	-1.10265	0.364483	0.715497	0.903551	no	LOWDATA	44.0619	24.2183	-0.863436	0	1	1	no	OK	29.8734	19.1037	-0.645008	0.507257	0.611974	1	no
13103.m05527	LOC_Os03g50820.1	=	cytochrome b561, putative, expressed	chr03:29006163-29025603	LOWDATA	2.09461	1.14481	-0.871577	0	1	1	no	NOTEST	2.78977	1.69736	-0.716854	0.024131	0.980748	1	no	OK	2.95938	1.72545	-0.778318	0.0192096	0.984674	1	no	OK	4.45142	2.78796	-0.675053	0.176497	0.859904	1	no
13103.m05568	LOC_Os03g51220.1	=	SWI/SNF-related matrix-associated actin-dependent regulator of chromatin subfamily C member, putative, expressed	chr03:29287008-29559081	LOWDATA	10.4515	14.448	0.467162	0	1	1	no	LOWDATA	8.03274	5.07153	-0.663472	0	1	1	no	FAIL	7.86279	13	0	0	1	1	no	FAIL	11.0953	11.5604	0	0	1	1	no
13103.m05570	LOC_Os03g51230.2	=	SNF2 family N-terminal domain containing protein, expressed	chr03:29287008-29559081	LOWDATA	4.75608	3.37268	-0.495879	0	1	1	no	LOWDATA	2.76324	1.05573	-1.38812	0	1	1	no	FAIL	2.56836	3.153	0	0	1	1	no	FAIL	8.61942	5.59059	0	0	1	1	no
13103.m05572	LOC_Os03g51240.3	=	glycosyl hydrolases family 17, putative, expressed	chr03:29287008-29559081	LOWDATA	3.07959	4.37713	0.507247	0	1	1	no	LOWDATA	1.18582	3.4256	1.53048	0	1	1	no	FAIL	0.791764	0.458054	0	0	1	1	no	FAIL	0.928279	7.23074	0	0	1	1	no
13103.m05575	LOC_Os03g51260.1	=	expressed protein	chr03:29287008-29559081	LOWDATA	1.304	1.31944	0.0169903	0	1	1	no	LOWDATA	0.762479	0.626541	-0.283288	0	1	1	no	FAIL	0.424698	0.784995	0	0	1	1	no	FAIL	0.959248	1.36001	0	0	1	1	no
13103.m05582	LOC_Os03g51330.1	=	GRAS family transcription factor domain containing protein, expressed	chr03:29287008-29559081	LOWDATA	2.75473	2.74272	-0.00630025	0	1	1	no	LOWDATA	2.55765	3.18141	0.314852	0	1	1	no	FAIL	2.51963	2.94022	0	0	1	1	no	FAIL	3.44274	3.94984	0	0	1	1	no
13103.m05583	LOC_Os03g51340.1	=	hypothetical protein	chr03:29287008-29559081	LOWDATA	0.432058	0.28364	-0.607166	0	1	1	no	LOWDATA	0.258622	0.568705	1.13684	0	1	1	no	FAIL	0.144363	0.301979	0	0	1	1	no	FAIL	0.236149	0.243557	0	0	1	1	no
13103.m05584	LOC_Os03g51350.1	=	expressed protein	chr03:29287008-29559081	LOWDATA	0.998626	28.1719	4.81817	0	1	1	no	LOWDATA	0.136097	28.7812	7.72435	0	1	1	no	FAIL	0.642596	18.5405	0	0	1	1	no	FAIL	0.704227	35.9384	0	0	1	1	no
13103.m05586	LOC_Os03g51380.1	=	expressed protein	chr03:29287008-29559081	LOWDATA	4.44932	6.27887	0.496919	0	1	1	no	LOWDATA	5.99181	5.69316	-0.0737622	0	1	1	no	FAIL	5.32944	7.84581	0	0	1	1	no	FAIL	7.46345	10.0921	0	0	1	1	no
13103.m05590	LOC_Os03g51430.1	=	SEC14 cytosolic factor family protein, putative, expressed	chr03:29287008-29559081	LOWDATA	11.3064	12.5033	0.14517	0	1	1	no	LOWDATA	6.84389	4.73984	-0.529979	0	1	1	no	FAIL	5.82463	14.992	0	0	1	1	no	FAIL	10.0623	11.8411	0	0	1	1	no
13103.m05599	LOC_Os03g51479.3	=	maf, putative, expressed	chr03:29287008-29559081	LOWDATA	0.468409	4.83058	3.36636	0	1	1	no	NOTEST	0	0	0	0	1	1	no	FAIL	0.572812	7.53768	0	0	1	1	no	FAIL	0.82861	6.53202	0	0	1	1	no
13103.m05597	LOC_Os03g51479.2	=	maf, putative, expressed	chr03:29287008-29559081	LOWDATA	0.193207	12.0498	5.96271	0	1	1	no	LOWDATA	0.218563	0.33271	0.606218	0	1	1	no	FAIL	0.670461	7.61864	0	0	1	1	no	FAIL	0.524326	6.33354	0	0	1	1	no
13103.m05603	LOC_Os03g51510.1	=	ribosomal protein L6, putative, expressed	chr03:29287008-29559081	LOWDATA	12.1241	11.5183	-0.0739511	0	1	1	no	LOWDATA	8.23609	8.09419	-0.0250732	0	1	1	no	FAIL	12.6453	8.75279	0	0	1	1	no	FAIL	8.84074	15.3766	0	0	1	1	no
13103.m05608	LOC_Os03g51530.1	=	expressed protein	chr03:29287008-29559081	LOWDATA	3.14923	1.3668	-1.2042	0	1	1	no	LOWDATA	2.82312	1.51029	-0.902464	0	1	1	no	FAIL	1.3791	0.527783	0	0	1	1	no	FAIL	0.83618	0.754607	0	0	1	1	no
13103.m05609	LOC_Os03g51540.1	=	Ser/Thr protein phosphatase family protein, putative, expressed	chr03:29287008-29559081	LOWDATA	5.47372	4.45373	-0.297507	0	1	1	no	LOWDATA	0.515576	1.85494	1.84712	0	1	1	no	FAIL	4.39016	2.80378	0	0	1	1	no	FAIL	5.68317	4.50947	0	0	1	1	no
13103.m05612	LOC_Os03g51550.2	=	WD repeat-containing protein 5, putative, expressed	chr03:29287008-29559081	LOWDATA	2.51022	0.905845	-1.47048	0	1	1	no	LOWDATA	4.27476	1.22837	-1.79909	0	1	1	no	FAIL	2.47037	1.31918	0	0	1	1	no	FAIL	2.90786	2.25549	0	0	1	1	no
13103.m05610	LOC_Os03g51550.1	=	WD repeat-containing protein 5, putative, expressed	chr03:29287008-29559081	LOWDATA	1.13799	1.06463	-0.0961378	0	1	1	no	NOTEST	0	0	0	0	1	1	no	FAIL	2.65601	0.520966	0	0	1	1	no	FAIL	0.992129	2.10461	0	0	1	1	no
13103.m05611	LOC_Os03g51550.3	=	WD repeat-containing protein 5, putative, expressed	chr03:29287008-29559081	LOWDATA	0.201553	1.06508	2.40174	0	1	1	no	LOWDATA	0.736122	0.663851	-0.149085	0	1	1	no	FAIL	0.688731	1.3958	0	0	1	1	no	FAIL	2.41717	0	0	0	1	1	no
13103.m05620	LOC_Os03g51600.2	=	tubulin/FtsZ domain containing protein, putative, expressed	chr03:29287008-29559081	LOWDATA	189.67	124.154	-0.611363	0	1	1	no	LOWDATA	242.59	144.426	-0.748188	0	1	1	no	FAIL	103.649	56.9297	0	0	1	1	no	FAIL	158.448	81.6224	0	0	1	1	no
13103.m05621	LOC_Os03g51610.1	=	Inositol 1, 3, 4-trisphosphate 5/6-kinase, putative, expressed	chr03:29287008-29559081	LOWDATA	6.57396	5.79164	-0.182792	0	1	1	no	LOWDATA	9.26935	3.67224	-1.33581	0	1	1	no	FAIL	4.23172	5.91525	0	0	1	1	no	FAIL	5.81966	4.1974	0	0	1	1	no
13103.m05646	LOC_Os03g51830.1	=	heat shock protein DnaJ, putative, expressed	chr03:29717322-29722986	LOWDATA	9.34749	13.1892	0.496707	0	1	1	no	OK	7.54089	7.22263	-0.0622101	0.0912517	0.927293	0.991864	no	OK	6.70934	11.3227	0.754979	-1.1705	0.2418	0.793354	no	LOWDATA	7.98249	13.694	0.778638	0	1	1	no
13103.m05761	LOC_Os03g52830.1	=	FATC domain containing protein	chr03:30255496-30291120	LOWDATA	0.647064	1.37832	1.09093	0	1	1	no	LOWDATA	0.465716	0.19554	-1.25198	0	1	1	no	LOWDATA	1.12465	2.69779	1.2623	0	1	1	no	LOWDATA	1.50872	1.54782	0.0369036	0	1	1	no
13103.m05853	LOC_Os03g53600.2	=	HTH DNA-binding protein, putative, expressed	chr03:30716205-30733145	LOWDATA	0.554691	0.863007	0.637688	0	1	1	no	NOTEST	0	0	0	0	1	1	no	LOWDATA	0.655389	1.95121	1.57395	0	1	1	no	LOWDATA	1.19896	2.07235	0.789492	0	1	1	no
13103.m05890	LOC_Os03g53860.4	=	periplasmic beta-glucosidase precursor, putative, expressed	chr03:30828484-30880928	LOWDATA	3.90295	13.3795	1.77738	0	1	1	no	LOWDATA	24.9497	13.7252	-0.862197	0	1	1	no	LOWDATA	3.89085	9.35535	1.26571	0	1	1	no	LOWDATA	13.468	13.7073	0.0254042	0	1	1	no
13103.m05943	LOC_Os03g54240.1	=	expressed protein	chr03:31070462-31160380	LOWDATA	2.07167	3.15801	0.608216	0	1	1	no	NOTEST	0	0	0	0	1	1	no	LOWDATA	0.710575	0.94724	0.414743	0	1	1	no	NOTEST	0.0173413	0	0	0	1	1	no
13103.m05946	LOC_Os03g54760.1	=	mitochondrial carrier protein, putative, expressed	chr03:31070462-31160380	LOWDATA	5.56816	19.7272	1.82491	0	1	1	no	LOWDATA	6.56729	4.14692	-0.663259	0	1	1	no	LOWDATA	2.59836	12.4929	2.26543	0	1	1	no	OK	0.853404	7.79886	3.19196	-0.814997	0.415074	1	no
13103.m05949	LOC_Os03g54770.2	=	WD domain, G-beta repeat domain containing protein, expressed	chr03:31070462-31160380	LOWDATA	0.249138	0.78333	1.65268	0	1	1	no	LOWDATA	0.37993	1.2632	1.73328	0	1	1	no	NOTEST	0	0	0	0	1	1	no	LOWDATA	0.788038	0.187089	-2.07454	0	1	1	no
13103.m05948	LOC_Os03g54770.3	=	WD domain, G-beta repeat domain containing protein, expressed	chr03:31070462-31160380	LOWDATA	0.658688	0.998166	0.599685	0	1	1	no	LOWDATA	0.173072	0.829334	2.26058	0	1	1	no	LOWDATA	0.547549	0.716764	0.38851	0	1	1	no	NOTEST	0.913333	0	0	0	1	1	no
13103.m05947	LOC_Os03g54770.1	=	WD domain, G-beta repeat domain containing protein, expressed	chr03:31070462-31160380	LOWDATA	4.05067	3.84865	-0.0738076	0	1	1	no	LOWDATA	3.21125	1.02054	-1.6538	0	1	1	no	LOWDATA	3.72172	3.76806	0.0178522	0	1	1	no	OK	2.97195	3.92903	0.402761	-0.332488	0.739521	1	no
13103.m05950	LOC_Os03g54780.1	=	STE_PAK_Ste20_KHSh_GCKh_HPKh.1 - STE kinases include homologs to sterile 7, sterile 11 and sterile 20 from yeast, expressed	chr03:31070462-31160380	LOWDATA	6.74765	7.37564	0.128384	0	1	1	no	OK	6.54889	3.00514	-1.12382	0.547637	0.583941	0.832052	no	LOWDATA	5.93262	8.28804	0.482362	0	1	1	no	OK	9.86931	8.1894	-0.269191	0.244847	0.806575	1	no
13103.m05953	LOC_Os03g54820.1	=	hypothetical protein	chr03:31070462-31160380	LOWDATA	5.30385	5.92426	0.159594	0	1	1	no	LOWDATA	4.5025	5.72752	0.347183	0	1	1	no	LOWDATA	4.59993	2.73862	-0.748165	0	1	1	no	OK	3.30544	4.52702	0.453722	-0.483122	0.629009	1	no
13103.m05981	LOC_Os03g55070.1	=	UDP-glucose 6-dehydrogenase, putative, expressed	chr03:31308675-31332244	LOWDATA	61.5026	49.6883	-0.307742	0	1	1	no	OK	42.835	24.2793	-0.819062	1.3699	0.170719	0.485998	no	LOWDATA	66.7495	87.2106	0.385746	0	1	1	no	OK	66.2491	49.5515	-0.418972	0.994858	0.319805	0.993553	no
13103.m06038	LOC_Os03g55490.2	=	casein kinase II subunit alpha-2, putative, expressed	chr03:31546797-31563354	LOWDATA	0.329769	0.291934	-0.175813	0	1	1	no	LOWDATA	1.05007	0.249516	-2.07328	0	1	1	no	LOWDATA	0.437151	0.464664	0.0880556	0	1	1	no	LOWDATA	0.628796	1.49082	1.24544	0	1	1	no
13103.m06132	LOC_Os03g56260.1	=	kinesin motor domain containing protein, putative, expressed	chr03:32056575-32088524	LOWDATA	0.62982	1.38496	1.13683	0	1	1	no	NOTEST	1.40206	0	0	0	1	1	no	LOWDATA	0.168517	1.68125	3.31857	0	1	1	no	LOWDATA	2.33891	1.69052	-0.46837	0	1	1	no
13103.m06135	LOC_Os03g56270.3	=	receptor protein kinase CLAVATA1 precursor, putative, expressed	chr03:32056575-32088524	LOWDATA	2.38855	1.89809	-0.331586	0	1	1	no	LOWDATA	2.93826	0.641481	-2.19548	0	1	1	no	OK	3.87462	5.00611	0.369636	-0.179748	0.85735	1	no	LOWDATA	7.36361	4.79202	-0.61978	0	1	1	no
13103.m06150	LOC_Os03g56390.1	=	tRNA wybutosine-synthesizing protein 1, putative, expressed	chr03:32134993-32161433	LOWDATA	6.08605	6.84563	0.169678	0	1	1	no	OK	5.95739	5.42515	-0.135017	0.0951183	0.924221	0.991035	no	OK	5.23628	7.56997	0.531744	-0.279994	0.779482	1	no	OK	7.68581	8.42952	0.133254	-0.20618	0.83665	1	no
13103.m06182	LOC_Os03g56660.1	=	calmodulin binding protein, putative, expressed	chr03:32258540-32267046	LOWDATA	2.29208	1.87511	-0.289686	0	1	1	no	NOTEST	1.75615	0	0	0	1	1	no	OK	2.05766	2.66059	0.370741	-0.147559	0.882691	1	no	LOWDATA	3.48133	3.94592	0.180723	0	1	1	no
13103.m12893	LOC_Os03g56660.3	=	calmodulin binding protein, putative, expressed	chr03:32258540-32267046	LOWDATA	0.524562	1.06952	1.02778	0	1	1	no	NOTEST	0	0	0	0	1	1	no	LOWDATA	0.52052	0.617661	0.246862	0	1	1	no	LOWDATA	0.606993	0.554585	-0.130272	0	1	1	no
13103.m06345	LOC_Os03g57840.2	=	peptidase M50, mammalian sterol-regulatory element binding protein, putative, expressed	chr03:32941083-32949809	LOWDATA	13.3913	13.9204	0.0559056	0	1	1	no	OK	26.3457	13.8314	-0.929617	1.614	0.106527	0.390328	no	FAIL	12.0231	13.1214	0	0	1	1	no	FAIL	18.9106	16.7919	0	0	1	1	no
13103.m06369	LOC_Os03g58010.1	=	acetyltransferase, GNAT family, putative, expressed	chr03:33026210-33053291	LOWDATA	6.18561	23.2808	1.91215	0	1	1	no	OK	4.72192	3.70139	-0.351305	0.439031	0.660639	0.874011	no	OK	7.38266	24.2345	1.71485	-2.44931	0.014313	0.171069	no	OK	3.87853	14.0255	1.85447	-2.17252	0.0298167	0.306253	no
13103.m06370	LOC_Os03g58020.1	=	acetyltransferase, GNAT family, putative, expressed	chr03:33026210-33053291	LOWDATA	3.82101	11.4506	1.58339	0	1	1	no	OK	3.67582	12.844	1.80496	-2.10139	0.035607	0.213999	no	OK	3.0058	6.14631	1.03197	-1.05225	0.292684	0.849841	no	OK	2.33723	6.85126	1.55157	-1.46666	0.142469	0.734745	no
13103.m06376	LOC_Os03g58060.1	=	XRN 5'-3' exonuclease N-terminus domain containing protein, expressed	chr03:33026210-33053291	LOWDATA	8.07251	10.4269	0.369228	0	1	1	no	OK	7.70928	5.64627	-0.449299	0.553082	0.580207	0.82974	no	LOWDATA	4.90421	4.07133	-0.268521	0	1	1	no	OK	4.72082	6.23022	0.400245	-0.403944	0.686254	1	no
13103.m06422	LOC_Os03g58490.1	=	DUF593 domain containing protein, expressed	chr03:33303252-33312621	LOWDATA	0.51012	0.58114	0.188048	0	1	1	no	LOWDATA	0.962815	0.585291	-0.718104	0	1	1	no	NOTEST	0.267632	0	0	0	1	1	no	LOWDATA	0.672095	0.779928	0.214676	0	1	1	no
13103.m06490	LOC_Os03g59100.1	=	pheophorbide a oxygenase, chloroplast precursor, putative, expressed	chr03:33631448-33685228	LOWDATA	2.83385	4.27151	0.591982	0	1	1	no	NOTEST	0.57152	1.07536	0.911942	-0.617377	0.536986	1	no	OK	3.50787	3.65223	0.0581856	-0.082597	0.934172	1	no	LOWDATA	0.619894	1.58029	1.35009	0	1	1	no
13103.m06494	LOC_Os03g59146.1	=	conserved hypothetical protein	chr03:33631448-33685228	LOWDATA	0.122967	0.0502001	-1.29251	0	1	1	no	NOTEST	0.0882746	0.024265	-1.86312	0.199958	0.841514	1	no	NOTEST	0.262295	0.0370021	-2.82551	1.6869	0.0916227	1	no	NOTEST	0	0	0	0	1	1	no
13103.m06495	LOC_Os03g59152.1	=	lethal leaf spot 1, putative	chr03:33631448-33685228	LOWDATA	0.0844592	0.0523659	-0.689626	0	1	1	no	NOTEST	0	0	0	0	1	1	no	NOTEST	0.029987	0	-1e+300	-1e+300	0.158655	1	no	NOTEST	0.0560603	0	0	0	1	1	no
13103.m06504	LOC_Os03g59240.1	=	carboxyl-terminal peptidase, putative, expressed	chr03:33724271-33743348	LOWDATA	14.0111	9.73389	-0.525483	0	1	1	no	OK	21.6302	12.1989	-0.826295	1.39594	0.162733	0.474191	no	OK	14.8987	15.1117	0.0204859	-0.0312697	0.975054	1	no	OK	28.9865	18.6867	-0.633372	1.17981	0.238074	0.905934	no
13103.m06513	LOC_Os03g59330.1	=	polygalacturonase, putative, expressed	chr03:33761872-33779337	LOWDATA	0.499512	0.821067	0.716982	0	1	1	no	LOWDATA	0.367801	0.435088	0.242381	0	1	1	no	LOWDATA	0.558473	0.914908	0.71214	0	1	1	no	LOWDATA	0.626092	2.3873	1.93093	0	1	1	no
13103.m06553	LOC_Os03g59710.1	=	RNA recognition motif containing protein, putative, expressed	chr03:33987280-34029999	LOWDATA	25.6408	29.6787	0.210987	0	1	1	no	OK	28.4813	32.9779	0.211484	-0.37755	0.705765	0.898631	no	OK	25.558	33.307	0.382048	-0.5972	0.550374	1	no	LOWDATA	37.8303	41.1931	0.12286	0	1	1	no
13103.m06556	LOC_Os03g59740.2	=	ADP-ribosylation factor, putative, expressed	chr03:33987280-34029999	LOWDATA	76.3085	106.527	0.4813	0	1	1	no	OK	59.6019	96.769	0.699188	-1.59772	0.110105	0.396316	no	OK	30.2666	49.5696	0.71173	-1.42097	0.155326	0.665408	no	LOWDATA	54.8818	64.0804	0.223555	0	1	1	no
13103.m06557	LOC_Os03g59740.3	=	ADP-ribosylation factor, putative, expressed	chr03:33987280-34029999	LOWDATA	6.51131	3.48602	-0.901366	0	1	1	no	OK	4.83352	9.49074	0.973448	-0.608814	0.542648	0.80754	no	OK	1.53499	4.27925	1.47912	-0.55856	0.576462	1	no	LOWDATA	6.64315	5.90874	-0.169017	0	1	1	no
13103.m06565	LOC_Os03g59770.1	=	EF hand family protein, putative, expressed	chr03:33987280-34029999	LOWDATA	5.65743	7.45066	0.39722	0	1	1	no	LOWDATA	2.77709	2.01626	-0.461897	0	1	1	no	OK	4.33628	4.40567	0.0229029	-0.000484876	0.999613	1	no	LOWDATA	2.16367	7.65335	1.82261	0	1	1	no
13103.m06647	LOC_Os03g60560.1	=	ZOS3-21 - C2H2 zinc finger protein, expressed	chr03:34399909-34589387	LOWDATA	6.23853	77.2331	3.62994	0	1	1	no	LOWDATA	5.64023	30.0777	2.41487	0	1	1	no	LOWDATA	1.69694	67.3545	5.31077	0	1	1	no	LOWDATA	7.42519	40.4065	2.44409	0	1	1	no
13103.m06650	LOC_Os03g60590.2	=	actin-depolymerizing factor, putative, expressed	chr03:34399909-34589387	LOWDATA	63.2445	69.4009	0.134014	0	1	1	no	LOWDATA	71.9659	55.0306	-0.387079	0	1	1	no	LOWDATA	88.3078	142.43	0.689641	0	1	1	no	LOWDATA	147.416	122.962	-0.261678	0	1	1	no
13103.m06666	LOC_Os03g60710.1	=	protein kinase domain containing protein, expressed	chr03:34399909-34589387	LOWDATA	0.136973	0.521706	1.92934	0	1	1	no	LOWDATA	0.377716	5.7992	3.94048	0	1	1	no	LOWDATA	3.21886	2.2816	-0.496504	0	1	1	no	LOWDATA	0.724793	4.24819	2.55121	0	1	1	no
13103.m06669	LOC_Os03g60730.2	=	transposon protein, putative, unclassified, expressed	chr03:34399909-34589387	LOWDATA	1.0997	0.577573	-0.929039	0	1	1	no	NOTEST	0.541789	0	0	0	1	1	no	LOWDATA	0.773187	0.974755	0.334222	0	1	1	no	NOTEST	0	0	0	0	1	1	no
13103.m06672	LOC_Os03g60750.1	=	ribosomal RNA large subunit methyltransferase J, putative, expressed	chr03:34399909-34589387	LOWDATA	3.93102	4.51517	0.199875	0	1	1	no	LOWDATA	4.14297	3.51146	-0.238591	0	1	1	no	LOWDATA	3.75365	4.05832	0.112587	0	1	1	no	LOWDATA	3.80409	3.78691	-0.00653092	0	1	1	no
13103.m06678	LOC_Os03g60790.1	=	heat shock protein DnaJ, putative, expressed	chr03:34399909-34589387	LOWDATA	2.96549	3.78838	0.353309	0	1	1	no	LOWDATA	10.8066	9.59432	-0.171658	0	1	1	no	LOWDATA	7.0125	7.97366	0.185312	0	1	1	no	LOWDATA	9.66919	9.1599	-0.0780645	0	1	1	no
13103.m06677	LOC_Os03g60790.2	=	heat shock protein DnaJ, putative, expressed	chr03:34399909-34589387	LOWDATA	2.1581	1.69054	-0.352278	0	1	1	no	OK	3.72979	0	0	0	1	1	no	LOWDATA	0.355547	0.393721	0.147133	0	1	1	no	LOWDATA	1.31748	0.858285	-0.61825	0	1	1	no
13103.m06744	LOC_Os03g61260.1	=	ribosomal L18p/L5e family protein, putative, expressed	chr03:34778342-34780384	LOWDATA	47.4939	23.3159	-1.02643	0	1	1	no	OK	100.708	51.843	-0.95796	3.87398	0.000107071	0.00476312	yes	LOWDATA	45.5976	15.6401	-1.54371	0	1	1	no	OK	55.2619	28.9333	-0.933556	2.81739	0.00484158	0.0832096	no
13103.m06748	LOC_Os03g61280.1	=	OsMan05 - Endo-Beta-Mannanase, expressed	chr03:34784891-34793724	LOWDATA	0.298452	0.284679	-0.0681611	0	1	1	no	NOTEST	2.40341	0.746232	-1.68739	2.5507	0.0107507	1	no	LOWDATA	0.0843734	0.159629	0.919862	0	1	1	no	NOTEST	0.334563	0	0	0	1	1	no
13103.m06938	LOC_Os03g62690.2	=	pentatricopeptide, putative, expressed	chr03:35463056-35590661	LOWDATA	1.07843	0.488316	-1.14304	0	1	1	no	FAIL	1.98282	0.113303	0	0	1	1	no	LOWDATA	0.116596	0.51812	2.15177	0	1	1	no	LOWDATA	0.741945	0.589492	-0.33184	0	1	1	no
13103.m06939	LOC_Os03g62690.1	=	pentatricopeptide, putative, expressed	chr03:35463056-35590661	LOWDATA	0.368006	0.960887	1.38464	0	1	1	no	FAIL	1.47537	1.06846	0	0	1	1	no	LOWDATA	0.808036	0.307131	-1.39557	0	1	1	no	LOWDATA	0.456983	0.328624	-0.475702	0	1	1	no
13103.m06941	LOC_Os03g62710.1	=	transposon protein, putative, unclassified	chr03:35463056-35590661	LOWDATA	0.0279093	0.0575644	1.04443	0	1	1	no	FAIL	0.0341501	0	0	0	1	1	no	NOTEST	0	0	0	0	1	1	no	LOWDATA	0.00335805	0.023923	2.83271	0	1	1	no
13103.m06942	LOC_Os03g62720.1	=	exosome complex exonuclease, putative, expressed	chr03:35463056-35590661	LOWDATA	0.832718	0.0666996	-3.64208	0	1	1	no	FAIL	0.146358	1.06019	0	0	1	1	no	LOWDATA	3.46172	0.988972	-1.80749	0	1	1	no	LOWDATA	2.76986	1.95141	-0.505297	0	1	1	no
13103.m06943	LOC_Os03g62730.2	=	transposon protein, putative, unclassified, expressed	chr03:35463056-35590661	LOWDATA	1.3289	0.760384	-0.805432	0	1	1	no	FAIL	0.223503	0.345381	0	0	1	1	no	LOWDATA	0.486143	4.16342	3.09832	0	1	1	no	NOTEST	0	0	0	0	1	1	no
13103.m06944	LOC_Os03g62730.1	=	transposon protein, putative, unclassified, expressed	chr03:35463056-35590661	LOWDATA	4.4005	5.87025	0.415754	0	1	1	no	FAIL	5.98862	3.06844	0	0	1	1	no	LOWDATA	4.23494	3.0292	-0.483404	0	1	1	no	LOWDATA	5.39822	3.48469	-0.631454	0	1	1	no
13103.m06948	LOC_Os03g62750.1	=	inner membrane protein, putative, expressed	chr03:35463056-35590661	LOWDATA	3.14204	8.3389	1.40815	0	1	1	no	FAIL	0.495139	1.51949	0	0	1	1	no	LOWDATA	3.26004	6.55993	1.00879	0	1	1	no	LOWDATA	4.80879	4.1875	-0.199583	0	1	1	no
13103.m13045	LOC_Os03g62750.4	=	inner membrane protein, putative, expressed	chr03:35463056-35590661	LOWDATA	2.67579	1.56604	-0.772845	0	1	1	no	FAIL	2.55517	0	0	0	1	1	no	LOWDATA	0.741195	2.38704	1.6873	0	1	1	no	LOWDATA	0.87777	1.78896	1.0272	0	1	1	no
13103.m06946	LOC_Os03g62750.3	=	inner membrane protein, putative, expressed	chr03:35463056-35590661	LOWDATA	0.139368	3.85335	4.78915	0	1	1	no	FAIL	0	0	0	0	1	1	no	LOWDATA	0.169718	1.18933	2.80894	0	1	1	no	NOTEST	0	0	0	0	1	1	no
13103.m06956	LOC_Os03g62810.1	=	transposon protein, putative, unclassified	chr03:35463056-35590661	LOWDATA	0.0230944	0.0572755	1.31037	0	1	1	no	FAIL	4.24408	1.31336	0	0	1	1	no	NOTEST	0	0	0	0	1	1	no	LOWDATA	2.84303	1.84416	-0.624466	0	1	1	no
13103.m06957	LOC_Os03g62820.1	=	hypothetical protein	chr03:35463056-35590661	LOWDATA	0.0554529	0.0687632	0.310374	0	1	1	no	FAIL	0.444697	0.422326	0	0	1	1	no	NOTEST	0	0	0	0	1	1	no	LOWDATA	0.256756	0.946867	1.88276	0	1	1	no
13103.m06970	LOC_Os03g62910.2	=	expressed protein	chr03:35463056-35590661	LOWDATA	6.8753	3.83896	-0.840706	0	1	1	no	FAIL	1.90995	3.12905	0	0	1	1	no	LOWDATA	1.6759	6.6005	1.97764	0	1	1	no	LOWDATA	0.978201	2.04975	1.06724	0	1	1	no
13103.m06972	LOC_Os03g62910.4	=	expressed protein	chr03:35463056-35590661	LOWDATA	2.77473	6.99603	1.33419	0	1	1	no	FAIL	0	0	0	0	1	1	no	LOWDATA	1.27254	1.92389	0.596312	0	1	1	no	NOTEST	0	0	0	0	1	1	no
13103.m06993	LOC_Os03g63090.1	=	actin-related protein 2/3 complex subunit 4, putative, expressed	chr03:35662467-35665664	LOWDATA	0.224543	0.667314	1.57137	0	1	1	no	LOWDATA	0.592068	0.389123	-0.605536	0	1	1	no	LOWDATA	0.155351	0.271246	0.804069	0	1	1	no	NOTEST	0	0	0	0	1	1	no
13103.m07011	LOC_Os03g63260.3	=	pentatricopeptide, putative, expressed	chr03:35734660-35741043	LOWDATA	0.0563217	0.84308	3.90391	0	1	1	no	NOTEST	0	0	0	0	1	1	no	NOTEST	0	0	0	0	1	1	no	NOTEST	0	0	0	0	1	1	no
13103.m07019	LOC_Os03g63330.1	=	aspartokinase, chloroplast precursor, putative, expressed	chr03:35782915-35823081	LOWDATA	7.76386	9.36952	0.271201	0	1	1	no	OK	20.7782	2.81571	-2.8835	3.08361	0.00204502	0.0335839	yes	OK	12.2214	10.68	-0.194488	0.234908	0.814281	1	no	LOWDATA	21.0459	9.46299	-1.15317	0	1	1	no
13103.m07033	LOC_Os03g63440.1	=	frigida, putative, expressed	chr03:35823218-35838577	LOWDATA	1.02528	1.3054	0.348473	0	1	1	no	LOWDATA	1.66453	0.708124	-1.23304	0	1	1	no	LOWDATA	0.764931	0.58678	-0.38251	0	1	1	no	LOWDATA	1.04151	0.855234	-0.284287	0	1	1	no
13103.m07068	LOC_Os03g63730.1	=	RNA recognition motif containing protein, putative, expressed	chr03:35957729-35978691	LOWDATA	10.9726	12.5193	0.190259	0	1	1	no	LOWDATA	9.05618	9.83155	0.118516	0	1	1	no	OK	8.03482	10.1284	0.334063	-0.485889	0.627046	1	no	FAIL	0	0	0	0	1	1	no
13103.m00020	LOC_Os03g01160.2	=	protein kinase family protein, putative, expressed	chr03:103244-131795	LOWDATA	0.50564	0.559831	0.146879	0	1	1	no	LOWDATA	0.507633	0.153008	-1.73018	0	1	1	no	LOWDATA	0.266131	0.308204	0.211748	0	1	1	no	LOWDATA	0.410894	0.32004	-0.360517	0	1	1	no
13103.m00129	LOC_Os03g01910.2	=	transcription factor BTF3, putative, expressed	chr03:548761-573064	LOWDATA	1.23894	0.992265	-0.320306	0	1	1	no	LOWDATA	2.6177	0.493509	-2.40715	0	1	1	no	LOWDATA	0.638877	0.552811	-0.208751	0	1	1	no	LOWDATA	0.127207	0.619768	2.28455	0	1	1	no
13103.m00128	LOC_Os03g01910.1	=	transcription factor BTF3, putative, expressed	chr03:548761-573064	LOWDATA	13.7447	21.6712	0.656902	0	1	1	no	OK	9.27479	18.6332	1.00649	-1.24296	0.213881	0.541478	no	LOWDATA	6.15131	3.99746	-0.62181	0	1	1	no	OK	7.53713	13.0697	0.794141	-0.383632	0.701251	1	no
13103.m00130	LOC_Os03g01920.1	=	expressed protein	chr03:548761-573064	LOWDATA	13.5298	8.12573	-0.735575	0	1	1	no	OK	24.2111	8.99641	-1.42824	1.61218	0.106923	0.391078	no	OK	15.0976	9.82514	-0.619772	1.01994	0.307755	0.864309	no	LOWDATA	21.3636	15.6722	-0.446948	0	1	1	no
13103.m00195	LOC_Os03g02390.1	=	mitochondrial import inner membrane translocase subunit Tim17, putative, expressed	chr03:836625-862139	LOWDATA	6.88904	11.1287	0.691907	0	1	1	no	OK	6.26756	5.29756	-0.242575	0.110764	0.911803	0.986231	no	LOWDATA	7.46178	15.8929	1.09079	0	1	1	no	LOWDATA	8.26994	12.2467	0.566443	0	1	1	no
13103.m00197	LOC_Os03g02410.3	=	GHMP kinases ATP-binding protein, putative, expressed	chr03:836625-862139	LOWDATA	0.613013	2.95889	2.27107	0	1	1	no	OK	4.07229	0	-1e+300	-1e+300	0.0739523	0.32108	no	LOWDATA	3.25169	3.76613	0.211893	0	1	1	no	LOWDATA	2.01868	1.03235	-0.967476	0	1	1	no
13103.m00199	LOC_Os03g02410.1	=	GHMP kinases ATP-binding protein, putative, expressed	chr03:836625-862139	LOWDATA	1.32142	1.43137	0.115307	0	1	1	no	NOTEST	2.77506	1.17404	-1.24103	0.520894	0.60244	1	no	LOWDATA	0.925237	0.310947	-1.57315	0	1	1	no	LOWDATA	0.351008	3.20112	3.189	0	1	1	no
13103.m00200	LOC_Os03g02420.1	=	KH domain containing protein, putative, expressed	chr03:836625-862139	LOWDATA	24.4211	37.6656	0.625116	0	1	1	no	OK	29.4507	46.1141	0.646907	-1.44966	0.147154	0.454601	no	LOWDATA	18.6521	20.3481	0.125554	0	1	1	no	LOWDATA	21.4238	22.5788	0.0757488	0	1	1	no
13103.m00201	LOC_Os03g02430.1	=	PPR repeat domain containing protein, putative, expressed	chr03:836625-862139	LOWDATA	4.04134	5.07402	0.328296	0	1	1	no	OK	3.74522	3.33717	-0.166426	0.18576	0.852633	0.967089	no	LOWDATA	1.67376	1.87756	0.165764	0	1	1	no	LOWDATA	2.3468	1.90944	-0.297545	0	1	1	no
13103.m12915	LOC_Os03g03034.5	=	flavonol synthase/flavanone 3-hydroxylase, putative, expressed	chr03:1234370-1244058	LOWDATA	1.08909	3.30521	1.60162	0	1	1	no	NOTEST	0	0	0	0	1	1	no	LOWDATA	0.0860367	0.109314	0.345459	0	1	1	no	NOTEST	0	0	0	0	1	1	no
13103.m00310	LOC_Os03g03300.1	=	expressed protein	chr03:1414068-1415788	LOWDATA	1.91096	3.76186	0.977151	0	1	1	no	NOTEST	1.19502	0	0	0	1	1	no	NOTEST	0.519237	1.06928	1.04217	-0.765399	0.444034	1	no	NOTEST	0.485354	0	-1e+300	-1e+300	0.158655	1	no
13103.m00316	LOC_Os03g03360.1	=	ribosomal protein L5, putative, expressed	chr03:1427205-1460714	LOWDATA	29.5146	18.0636	-0.708346	0	1	1	no	OK	75.0885	47.9778	-0.646225	1.42933	0.152909	0.462836	no	LOWDATA	45.6405	20.5536	-1.15092	0	1	1	no	LOWDATA	76.2775	55.2548	-0.465158	0	1	1	no
13103.m00317	LOC_Os03g03370.1	=	fatty acid hydroxylase, putative, expressed	chr03:1427205-1460714	LOWDATA	3.9537	19.0514	2.26862	0	1	1	no	OK	2.84738	11.3438	1.99419	-1.10605	0.268704	0.599808	no	OK	3.3542	23.042	2.78023	-3.1906	0.00141976	0.0382896	yes	LOWDATA	2.57099	26.3902	3.35961	0	1	1	no
13103.m00354	LOC_Os03g03650.1	=	POLD2 - Putative DNA polymerase delta complex subunit, expressed	chr03:1611320-1615451	LOWDATA	3.56242	2.51032	-0.504989	0	1	1	no	NOTEST	3.14648	1.5967	-0.978647	1.58133	0.113803	1	no	OK	3.58648	3.00349	-0.255929	0.262223	0.79315	1	no	LOWDATA	5.12965	2.72926	-0.910351	0	1	1	no
13103.m00360	LOC_Os03g03670.1	=	expressed protein	chr03:1623874-1648010	LOWDATA	14.7617	8.32576	-0.8262	0	1	1	no	LOWDATA	22.6943	14.9546	-0.601744	0	1	1	no	OK	22.6695	9.19492	-1.30184	1.80807	0.070596	0.447399	no	OK	20.2298	13.5665	-0.576434	0.551511	0.581283	1	no
13103.m00365	LOC_Os03g03700.1	=	MLO domain containing protein, putative, expressed	chr03:1623874-1648010	LOWDATA	3.09409	11.1546	1.85005	0	1	1	no	LOWDATA	2.32539	1.75577	-0.405366	0	1	1	no	OK	3.21886	9.8713	1.61669	-0.917787	0.35873	0.904592	no	OK	2.18207	5.4588	1.32288	-0.524469	0.599953	1	no
13103.m00382	LOC_Os03g03830.1	=	EF hand family protein, putative, expressed	chr03:1704892-1747190	LOWDATA	5.34903	5.28494	-0.0173924	0	1	1	no	OK	6.24191	6.46718	0.05115	-0.0653602	0.947887	0.998603	no	OK	4.14833	5.82056	0.488628	-0.430882	0.666554	1	no	OK	3.61788	7.41405	1.03512	-1.17326	0.240693	0.90799	no
13103.m00383	LOC_Os03g03840.1	=	hypothetical protein	chr03:1704892-1747190	LOWDATA	0.277303	2.40705	3.11773	0	1	1	no	NOTEST	0	2.66928	1e+300	1e+300	0.124107	1	no	NOTEST	0.592888	0.381602	-0.63569	0.231571	0.816871	1	no	NOTEST	2.03206	2.66739	0.392484	-0.2441	0.807154	1	no
13103.m00384	LOC_Os03g03850.1	=	GATA zinc finger domain containing protein	chr03:1704892-1747190	LOWDATA	0.0770038	0.477435	2.6323	0	1	1	no	NOTEST	0.0559699	0	-1e+300	-1e+300	0.158655	1	no	NOTEST	0	0	0	0	1	1	no	NOTEST	0	0	0	0	1	1	no
13103.m00387	LOC_Os03g03860.3	=	expressed protein	chr03:1704892-1747190	LOWDATA	3.15032	2.13944	-0.558267	0	1	1	no	NOTEST	1.14938	3.73974	1.70208	-1.14422	0.252533	1	no	OK	3.09795	2.42894	-0.350992	0.212386	0.831806	1	no	OK	3.25553	4.14334	0.347899	-0.239015	0.811094	1	no
13103.m00386	LOC_Os03g03860.1	=	expressed protein	chr03:1704892-1747190	LOWDATA	0.294549	0.770362	1.38703	0	1	1	no	OK	4.32359	0	-1e+300	-1e+300	0.0481005	0.252587	no	NOTEST	0	0	0	0	1	1	no	NOTEST	3.04871	0	0	0	1	1	no
13103.m00418	LOC_Os03g04090.1	=	hypothetical protein	chr03:1872039-1877446	LOWDATA	0.218104	0.170461	-0.355582	0	1	1	no	LOWDATA	0.626809	0.0987232	-2.66656	0	1	1	no	LOWDATA	0.0817353	0.0521513	-0.648257	0	1	1	no	LOWDATA	0.047812	0.220445	2.20497	0	1	1	no
13103.m00438	LOC_Os03g04310.1	=	BHLH transcription factor, putative, expressed	chr03:1982517-1984732	LOWDATA	11.2853	3.92781	-1.52264	0	1	1	no	LOWDATA	5.36817	2.13691	-1.32891	0	1	1	no	LOWDATA	12.0129	5.67345	-1.08229	0	1	1	no	OK	9.14602	6.48243	-0.496609	0.664401	0.506434	1	no
13103.m00516	LOC_Os03g04960.3	=	cysteinyl-tRNA synthetase, putative, expressed	chr03:2374079-2579566	LOWDATA	0.254695	1.92568	2.91853	0	1	1	no	LOWDATA	0.154192	1.09627	2.8298	0	1	1	no	LOWDATA	4.09999	1.59785	-1.35949	0	1	1	no	NOTEST	1.84985	0	-1e+300	-1e+300	0.314926	1	no
13103.m00517	LOC_Os03g04960.1	=	cysteinyl-tRNA synthetase, putative, expressed	chr03:2374079-2579566	LOWDATA	14.1755	15.1572	0.0965977	0	1	1	no	LOWDATA	14.486	8.03541	-0.850216	0	1	1	no	LOWDATA	5.77322	12.3786	1.10041	0	1	1	no	LOWDATA	11.9964	16.8309	0.488506	0	1	1	no
13103.m00521	LOC_Os03g04970.1	=	T-complex protein, putative, expressed	chr03:2374079-2579566	LOWDATA	12.1627	10.8497	-0.164818	0	1	1	no	LOWDATA	13.2331	3.94706	-1.7453	0	1	1	no	LOWDATA	11.7262	12.11	0.0464589	0	1	1	no	LOWDATA	11.2602	8.42475	-0.418522	0	1	1	no
13103.m00539	LOC_Os03g05140.1	=	receptor-like protein kinase 2 precursor, putative	chr03:2374079-2579566	LOWDATA	3.61199	0.0505531	-6.15885	0	1	1	no	LOWDATA	0.106674	0.0260612	-2.03324	0	1	1	no	LOWDATA	2.26912	0.0447087	-5.66544	0	1	1	no	NOTEST	0.292185	0.208342	-0.487934	0.152046	0.879151	1	no
13103.m00544	LOC_Os03g05200.1	=	DENN domain containing protein, expressed	chr03:2374079-2579566	LOWDATA	6.54309	18.0304	1.46239	0	1	1	no	LOWDATA	3.98584	4.27126	0.0997799	0	1	1	no	LOWDATA	3.31803	13.9019	2.06689	0	1	1	no	LOWDATA	3.92398	9.75279	1.3135	0	1	1	no
13103.m00546	LOC_Os03g05210.1	=	WD domain, G-beta repeat domain containing protein, expressed	chr03:2374079-2579566	LOWDATA	0.506056	2.61831	2.37126	0	1	1	no	LOWDATA	0.481979	1.11559	1.21077	0	1	1	no	LOWDATA	0.415048	2.89466	2.80205	0	1	1	no	NOTEST	0.382173	1.54679	2.01698	-1.54819	0.121577	1	no
13103.m00551	LOC_Os03g05260.1	=	ankyrin repeat domain containing protein, expressed	chr03:2374079-2579566	LOWDATA	22.9485	23.9038	0.0588439	0	1	1	no	LOWDATA	32.1875	19.1623	-0.748225	0	1	1	no	LOWDATA	25.3794	26.67	0.071556	0	1	1	no	LOWDATA	32.9726	26.746	-0.301943	0	1	1	no
13103.m00556	LOC_Os03g05290.1	=	aquaporin protein, putative, expressed	chr03:2374079-2579566	LOWDATA	58.9949	83.9979	0.509763	0	1	1	no	LOWDATA	96.7672	109.738	0.181474	0	1	1	no	LOWDATA	102.279	125.845	0.299145	0	1	1	no	LOWDATA	170.034	172.809	0.0233487	0	1	1	no
13103.m12923	LOC_Os03g05800.3	=	expressed protein	chr03:2896471-2899317	LOWDATA	0.185565	0.802371	2.11234	0	1	1	no	NOTEST	1.28949	0.159601	-3.01426	0.535839	0.592069	1	no	NOTEST	0.143188	0.151894	0.085158	-0.00222039	0.998228	1	no	NOTEST	0.0641492	0.167586	1.3854	-0.0318418	0.974598	1	no
13103.m00687	LOC_Os03g06290.1	=	OsSub27 - Putative Subtilisin homologue, expressed	chr03:3150508-3195710	LOWDATA	0.881337	0.981887	0.155864	0	1	1	no	LOWDATA	0.740689	0.671242	-0.142035	0	1	1	no	NOTEST	0.615925	0.604083	-0.0280077	0.0145941	0.988356	1	no	NOTEST	0	0	0	0	1	1	no
13103.m00700	LOC_Os03g06390.1	=	expressed protein	chr03:3150508-3195710	LOWDATA	1.53154	6.10514	1.99504	0	1	1	no	NOTEST	1.91638	1.05725	-0.858068	0.2677	0.78893	1	no	OK	0.75505	6.54285	3.11528	-0.528043	0.59747	1	no	NOTEST	0	0	0	0	1	1	no
13103.m00970	LOC_Os03g08440.1	=	ribosomal protein S2, putative, expressed	chr03:4326387-4407417	LOWDATA	28.9961	37.833	0.383787	0	1	1	no	LOWDATA	35.6174	10.2965	-1.79043	0	1	1	no	LOWDATA	47.4347	40.0893	-0.242727	0	1	1	no	OK	54.2553	48.7723	-0.1537	0.167314	0.867123	1	no
13103.m00972	LOC_Os03g08450.1	=	eukaryotic translation initiation factor 3 subunit K, putative, expressed	chr03:4326387-4407417	LOWDATA	23.0331	24.553	0.0921928	0	1	1	no	LOWDATA	28.5823	20.4525	-0.482847	0	1	1	no	LOWDATA	33.2338	29.2021	-0.186577	0	1	1	no	OK	33.0152	31.1722	-0.0828715	0.188699	0.850329	1	no
13103.m00973	LOC_Os03g08460.1	=	AP2 domain containing protein, expressed	chr03:4326387-4407417	LOWDATA	7.12266	6.96587	-0.0321122	0	1	1	no	LOWDATA	0.561723	0.697213	0.31174	0	1	1	no	LOWDATA	3.30245	3.32586	0.0101898	0	1	1	no	LOWDATA	0.424786	2.63875	2.63505	0	1	1	no
13103.m00974	LOC_Os03g08470.1	=	AP2 domain containing protein, expressed	chr03:4326387-4407417	LOWDATA	11.9312	12.3399	0.0485989	0	1	1	no	LOWDATA	10.3752	2.04831	-2.34063	0	1	1	no	LOWDATA	24.0577	14.6502	-0.715579	0	1	1	no	LOWDATA	10.722	20.66	0.946271	0	1	1	no
13103.m00978	LOC_Os03g08480.2	=	rho termination factor, N-terminal domain containing protein, expressed	chr03:4326387-4407417	LOWDATA	6.86477	7.98019	0.217213	0	1	1	no	LOWDATA	12.6194	6.47351	-0.963025	0	1	1	no	LOWDATA	6.11874	8.34252	0.447249	0	1	1	no	OK	11.697	8.20919	-0.510826	0.875573	0.381262	1	no
13103.m00982	LOC_Os03g08520.1	=	DUF581 domain containing protein, expressed	chr03:4326387-4407417	LOWDATA	3.89161	12.4467	1.67732	0	1	1	no	LOWDATA	0.661139	3.05797	2.20955	0	1	1	no	LOWDATA	3.47924	8.90946	1.35657	0	1	1	no	LOWDATA	0.269334	2.21951	3.04277	0	1	1	no
13103.m00987	LOC_Os03g08560.1	=	plasma membrane ATPase, putative, expressed	chr03:4326387-4407417	LOWDATA	0.347529	0.381807	0.135708	0	1	1	no	LOWDATA	0.0455398	0.115777	1.34615	0	1	1	no	LOWDATA	0.336736	0.264332	-0.349269	0	1	1	no	LOWDATA	0.135037	0.257559	0.931546	0	1	1	no
13103.m01013	LOC_Os03g08754.1	=	OsMADS47 - MADS-box family gene with MIKCc type-box, expressed	chr03:4495719-4525963	LOWDATA	1.57896	5.98396	1.92212	0	1	1	no	OK	9.32142	4.7804	-0.963418	1.12066	0.262431	0.5936	no	OK	4.61588	6.0779	0.396966	-0.215216	0.829599	1	no	OK	4.05035	5.77069	0.510698	-0.212405	0.831791	1	no
13103.m01014	LOC_Os03g08754.2	=	OsMADS47 - MADS-box family gene with MIKCc type-box, expressed	chr03:4495719-4525963	LOWDATA	14.0127	18.655	0.412822	0	1	1	no	OK	11.7021	14.836	0.342327	-0.48537	0.627414	0.857002	no	OK	11.8852	21.3761	0.846838	-1.3378	0.180962	0.7098	no	LOWDATA	23.892	25.2494	0.0797214	0	1	1	no
13103.m01018	LOC_Os03g08800.1	=	CutA, chloroplast precursor, putative, expressed	chr03:4540320-4568561	LOWDATA	12.4486	6.28748	-0.985432	0	1	1	no	OK	16.1036	12.1688	-0.404202	0.644204	0.519443	0.7912	no	OK	12.1905	10.629	-0.197752	0.287501	0.773729	1	no	OK	17.8623	17.7502	-0.00908009	0.0148844	0.988124	1	no
13103.m01070	LOC_Os03g09230.1	=	LTPL69 - Protease inhibitor/seed storage/LTP family protein precursor, expressed	chr03:4806924-4828749	LOWDATA	4.78018	7.49271	0.648423	0	1	1	no	LOWDATA	6.33405	5.20442	-0.28339	0	1	1	no	OK	8.89122	9.06811	0.0284198	-0.0162976	0.986997	1	no	FAIL	6.31978	0	0	0	1	1	no
13103.m01071	LOC_Os03g09230.2	=	LTPL69 - Protease inhibitor/seed storage/LTP family protein precursor, expressed	chr03:4806924-4828749	LOWDATA	0.989316	0.201931	-2.29257	0	1	1	no	LOWDATA	0.362323	0.370316	0.0314798	0	1	1	no	NOTEST	0	0	0	0	1	1	no	FAIL	0	0	0	0	1	1	no
13103.m01073	LOC_Os03g09250.2	=	inositol-3-phosphate synthase, putative, expressed	chr03:4806924-4828749	LOWDATA	1.47596	2.44218	0.726519	0	1	1	no	LOWDATA	0.811558	3.52791	2.12005	0	1	1	no	OK	1.34645	10.5475	2.96967	-2.51269	0.0119814	0.153538	no	FAIL	8.00121	0	0	0	1	1	no
13103.m01072	LOC_Os03g09250.1	=	inositol-3-phosphate synthase, putative, expressed	chr03:4806924-4828749	LOWDATA	22.6878	47.4722	1.06517	0	1	1	no	OK	40.7171	68.1101	0.742235	-2.40514	0.0161662	0.134882	no	OK	29.1084	43.5504	0.581252	-1.01718	0.309066	0.864831	no	FAIL	30.5604	0	0	0	1	1	no
13103.m01103	LOC_Os03g09930.2	=	sulfate transporter, putative, expressed	chr03:4945324-4958509	LOWDATA	0.888698	0.629804	-0.496791	0	1	1	no	NOTEST	0.543151	1.27755	1.23395	-1.06033	0.288992	1	no	LOWDATA	0.311585	0.231289	-0.429926	0	1	1	no	LOWDATA	0.404772	0.538792	0.412617	0	1	1	no
13103.m01170	LOC_Os03g10450.2	=	Sua5/YciO/YrdC/YwlC family protein, putative, expressed	chr03:5311443-5351017	LOWDATA	0.310522	0.243672	-0.349754	0	1	1	no	LOWDATA	0.338095	0.173806	-0.959952	0	1	1	no	LOWDATA	0.247075	0.293162	0.246749	0	1	1	no	NOTEST	0.0547478	0	0	0	1	1	no
13103.m01179	LOC_Os03g10510.2	=	outer mitochondrial membrane porin, putative, expressed	chr03:5311443-5351017	LOWDATA	1.45705	2.64276	0.85899	0	1	1	no	NOTEST	1.58361	0	0	0	1	1	no	LOWDATA	1.38037	3.1491	1.18989	0	1	1	no	NOTEST	0	0	0	0	1	1	no
13103.m01215	LOC_Os03g10810.1	=	HLS, putative, expressed	chr03:5537545-5539439	LOWDATA	1.54392	5.42084	1.81192	0	1	1	no	OK	1.21127	4.10026	1.7592	-2.69669	0.00700328	0.0798527	no	OK	0.696548	2.39404	1.78115	-1.57152	0.116061	0.577353	no	NOTEST	0.503864	2.85369	2.50172	-2.29324	0.0218342	1	no
13103.m01289	LOC_Os03g11420.1	=	Os3bglu6 - beta-glucosidase/beta-fucosidase/beta-galactosidase, expressed	chr03:5852905-5882316	LOWDATA	6.01005	7.02792	0.225721	0	1	1	no	LOWDATA	1.14805	0.867491	-0.40427	0	1	1	no	OK	3.9088	5.28191	0.434335	-0.226932	0.820477	1	no	OK	3.92619	6.80459	0.79338	-0.543359	0.586883	1	no
13103.m12944	LOC_Os03g11550.2	=	protein of unknown function DUF1675 domain containing protein, expressed	chr03:5965642-5987828	LOWDATA	0.446186	1.82328	2.03082	0	1	1	no	NOTEST	0	1.51163	1e+300	1e+300	0.367173	1	no	NOTEST	0	0	0	0	1	1	no	NOTEST	0	0	0	0	1	1	no
13103.m01469	LOC_Os03g12804.1	=	expressed protein	chr03:6862022-6897426	LOWDATA	0.39775	0.370305	-0.103147	0	1	1	no	NOTEST	0	0	0	0	1	1	no	NOTEST	0	0.311217	1e+300	1e+300	0.416944	1	no	NOTEST	0	0	0	0	1	1	no
13103.m01470	LOC_Os03g12810.2	=	maf, putative, expressed	chr03:6862022-6897426	LOWDATA	1.49683	3.47559	1.21534	0	1	1	no	NOTEST	1.91895	0.385032	-2.31726	0.256168	0.797821	1	no	NOTEST	1.0723	0.908403	-0.239305	0.0416909	0.966745	1	no	NOTEST	1.24567	0.990353	-0.330907	0.0967891	0.922894	1	no
13103.m01471	LOC_Os03g12810.1	=	maf, putative, expressed	chr03:6862022-6897426	LOWDATA	12.4162	11.9705	-0.052748	0	1	1	no	LOWDATA	16.3659	14.3715	-0.187479	0	1	1	no	LOWDATA	12.9061	22.7866	0.820136	0	1	1	no	OK	18.9972	12.7569	-0.574507	0.78296	0.433651	1	no
13103.m01486	LOC_Os03g12900.3	=	squalene monooxygenase, putative, expressed	chr03:6946875-6956464	LOWDATA	2.53836	1.77559	-0.5156	0	1	1	no	OK	5.63765	1.98933	-1.50281	0.978391	0.327881	0.654009	no	NOTEST	0	0	0	0	1	1	no	NOTEST	0	0	0	0	1	1	no
13103.m01487	LOC_Os03g12900.4	=	squalene monooxygenase, putative, expressed	chr03:6946875-6956464	LOWDATA	2.19118	0.876685	-1.32158	0	1	1	no	NOTEST	1.83522	1.08822	-0.753989	0.23898	0.811121	1	no	NOTEST	1.32351	0.6835	-0.953356	0.227666	0.819906	1	no	NOTEST	0	0	0	0	1	1	no
13103.m01529	LOC_Os03g13190.2	=	transposon protein, putative, unclassified, expressed	chr03:7106126-7129396	LOWDATA	0.743311	0.283983	-1.38816	0	1	1	no	LOWDATA	1.41519	0.23106	-2.61465	0	1	1	no	NOTEST	0.423974	0.131585	-1.68798	0.0598236	0.952296	1	no	NOTEST	0.760898	0.460217	-0.725387	0.13272	0.894415	1	no
13103.m01592	LOC_Os03g13730.2	=	translocase of chloroplast 34, putative, expressed	chr03:7432976-7437020	LOWDATA	0.443531	0.43866	-0.015934	0	1	1	no	LOWDATA	0.862168	0.449124	-0.940856	0	1	1	no	LOWDATA	0.116145	0.128264	0.143193	0	1	1	no	NOTEST	0.156156	0	0	0	1	1	no
13103.m01621	LOC_Os03g13950.1	=	actin-depolymerizing factor, putative, expressed	chr03:7558110-7596385	LOWDATA	53.7737	109.501	1.02598	0	1	1	no	OK	48.9073	83.2925	0.768137	-1.81378	0.0697119	0.310271	no	OK	43.8714	127.658	1.54093	-3.07794	0.00208435	0.049381	yes	OK	54.8441	143.081	1.38343	-5.98248	2.1977e-09	5.65163e-07	yes
13103.m12956	LOC_Os03g13950.4	=	actin-depolymerizing factor, putative, expressed	chr03:7558110-7596385	LOWDATA	4.09728	10.0992	1.3015	0	1	1	no	OK	3.76273	2.86586	-0.39281	0.0713814	0.943094	0.997576	no	OK	1.6857	2.54866	0.596392	-0.0875009	0.930273	1	no	LOWDATA	1.35456	4.10016	1.59786	0	1	1	no
13103.m01626	LOC_Os03g13970.1	=	26S proteasome non-ATPase regulatory subunit 4, putative, expressed	chr03:7558110-7596385	LOWDATA	18.0561	24.4437	0.436973	0	1	1	no	OK	24.0468	22.563	-0.0918873	0.164413	0.869406	0.972902	no	OK	13.5602	18.3968	0.440081	-0.535217	0.5925	1	no	OK	28.1919	20.8253	-0.436946	0.649904	0.515754	1	no
13103.m01627	LOC_Os03g13970.2	=	26S proteasome non-ATPase regulatory subunit 4, putative, expressed	chr03:7558110-7596385	LOWDATA	19.2286	16.5809	-0.213726	0	1	1	no	OK	21.4924	12.4335	-0.789599	1.05248	0.292581	0.622289	no	OK	19.2512	27.6962	0.524738	-0.846753	0.397133	0.932432	no	OK	17.5915	26.321	0.581333	-0.792151	0.428272	1	no
13103.m01631	LOC_Os03g13984.1	=	expressed protein	chr03:7558110-7596385	LOWDATA	0.0673116	0.333873	2.31037	0	1	1	no	NOTEST	0.228317	0.322752	0.499383	-0.191068	0.848472	1	no	NOTEST	0.0796533	0.123042	0.627344	-0.582238	0.560406	1	no	NOTEST	0.119129	0.179179	0.588881	-0.549145	0.582906	1	no
13103.m12957	LOC_Os03g14030.2	=	thaumatin, putative, expressed	chr03:7609927-7628620	LOWDATA	2.21199	1.4902	-0.569835	0	1	1	no	OK	3.95151	0.993318	-1.99207	1.48437	0.137711	0.437966	no	LOWDATA	0.764798	0.452979	-0.755635	0	1	1	no	NOTEST	0.729282	0.541158	-0.430428	0.0384054	0.969364	1	no
13103.m01671	LOC_Os03g14270.1	=	DUF260 domain containing protein, putative	chr03:7765641-7783774	LOWDATA	1.72541	2.18444	0.340329	0	1	1	no	LOWDATA	0.715299	1.50238	1.07064	0	1	1	no	LOWDATA	0.479372	0.636314	0.408593	0	1	1	no	LOWDATA	0.625736	1.07537	0.781206	0	1	1	no
13103.m01672	LOC_Os03g14280.1	=	ATP-dependent Clp protease ATP-binding subunit, putative, expressed	chr03:7765641-7783774	LOWDATA	15.3391	10.6333	-0.528629	0	1	1	no	LOWDATA	32.9982	15.7332	-1.06857	0	1	1	no	OK	20.4046	17.3944	-0.23027	0.394058	0.693538	1	no	LOWDATA	33.862	25.5244	-0.407787	0	1	1	no
13103.m01714	LOC_Os03g14654.1	=	LTPL108 - Protease inhibitor/seed storage/LTP family protein precursor, expressed	chr03:7957929-7965039	LOWDATA	2.00859	2.03079	0.0158542	0	1	1	no	OK	16.0005	1.2029	-3.73353	2.01093	0.0443324	0.24177	no	OK	17.9026	17.9138	0.000901887	-0.000481362	0.999616	1	no	OK	20.7272	13.1552	-0.655897	0.383377	0.70144	1	no
13103.m01736	LOC_Os03g14850.1	=	OsMADS72 - MADS-box family gene with M-alpha type-box, expressed	chr03:8093907-8116680	LOWDATA	0.33481	0.78989	1.23831	0	1	1	no	LOWDATA	0.444319	0.227494	-0.96577	0	1	1	no	LOWDATA	0.442768	0.531888	0.264572	0	1	1	no	LOWDATA	0.0826228	0.351181	2.0876	0	1	1	no
13103.m01740	LOC_Os03g14890.2	=	AGAP008572-PA, putative, expressed	chr03:8093907-8116680	LOWDATA	0.204699	0.0596273	-1.77946	0	1	1	no	LOWDATA	0.377324	0.127556	-1.56467	0	1	1	no	NOTEST	0.105453	0	0	0	1	1	no	NOTEST	0.11213	0	0	0	1	1	no
13103.m01755	LOC_Os03g15020.2	=	beta-galactosidase precursor, putative, expressed	chr03:8194883-8201128	LOWDATA	0.677288	1.13892	0.749824	0	1	1	no	NOTEST	0.972546	1.43709	0.563309	-0.856388	0.391783	1	no	LOWDATA	0.325876	0.625443	0.940555	0	1	1	no	NOTEST	0	0	0	0	1	1	no
13103.m01852	LOC_Os03g15780.4	=	anthranilate synthase component I-1, chloroplast precursor, putative, expressed	chr03:8701725-8740261	LOWDATA	3.89284	15.8492	2.02552	0	1	1	no	LOWDATA	4.39243	1.80386	-1.28393	0	1	1	no	OK	4.82515	19.7561	2.03366	-1.95053	0.0511127	0.369658	no	LOWDATA	7.12092	12.6336	0.82713	0	1	1	no
13103.m01856	LOC_Os03g15780.2	=	anthranilate synthase component I-1, chloroplast precursor, putative, expressed	chr03:8701725-8740261	LOWDATA	2.50958	12.3787	2.30234	0	1	1	no	LOWDATA	5.94231	0.160947	-5.20637	0	1	1	no	LOWDATA	3.98443	1.92814	-1.04717	0	1	1	no	OK	2.39793	5.55662	1.21242	-0.490766	0.623592	1	no
13103.m01853	LOC_Os03g15780.5	=	anthranilate synthase component I-1, chloroplast precursor, putative, expressed	chr03:8701725-8740261	LOWDATA	4.11701	5.42656	0.398441	0	1	1	no	LOWDATA	3.00374	7.57176	1.33387	0	1	1	no	LOWDATA	0.995065	13.3407	3.7449	0	1	1	no	OK	3.56117	3.98141	0.160929	-0.0726244	0.942105	1	no
13103.m01857	LOC_Os03g15790.1	=	ZOS3-08 - C2H2 zinc finger protein, expressed	chr03:8701725-8740261	LOWDATA	4.74765	6.09633	0.360728	0	1	1	no	LOWDATA	8.07075	7.77431	-0.0539876	0	1	1	no	LOWDATA	5.26787	5.67862	0.10832	0	1	1	no	LOWDATA	7.57555	6.00787	-0.334497	0	1	1	no
13103.m02000	LOC_Os03g16800.2	=	clathrin assembly protein, putative, expressed	chr03:9312611-9334384	LOWDATA	0.942579	1.76317	0.903487	0	1	1	no	NOTEST	2.62827	0.280291	-3.22912	0.166478	0.867781	1	no	LOWDATA	0.708942	0.947121	0.417882	0	1	1	no	LOWDATA	1.42146	0.649252	-1.13053	0	1	1	no
13103.m02014	LOC_Os03g16900.1	=	rab GDP dissociation inhibitor alpha, putative, expressed	chr03:9357945-9417674	LOWDATA	2.40686	1.32441	-0.861807	0	1	1	no	NOTEST	2.36172	0.721259	-1.71125	0.976052	0.329039	1	no	LOWDATA	1.89039	1.44356	-0.38905	0	1	1	no	LOWDATA	3.1547	1.82589	-0.7889	0	1	1	no
13103.m02017	LOC_Os03g16920.1	=	DnaK family protein, putative, expressed	chr03:9357945-9417674	LOWDATA	0.904914	5.27099	2.54222	0	1	1	no	LOWDATA	0.916687	21.6928	4.56464	0	1	1	no	OK	1.91199	6.99534	1.87132	-0.604398	0.545579	1	no	LOWDATA	1.17011	17.7132	3.92011	0	1	1	no
13103.m02084	LOC_Os03g17470.1	=	IN2-1 protein, putative, expressed	chr03:9707141-9719007	LOWDATA	0.229941	0.286831	0.318933	0	1	1	no	NOTEST	0.873452	0	0	0	1	1	no	LOWDATA	0.358852	0.333017	-0.107793	0	1	1	no	LOWDATA	0.284499	0.469905	0.723942	0	1	1	no
13103.m02098	LOC_Os03g17570.2	=	response regulator receiver domain containing protein, expressed	chr03:9742436-9767626	LOWDATA	15.9937	18.439	0.205258	0	1	1	no	OK	21.4879	10.9548	-0.971968	1.76535	0.0775053	0.328919	no	LOWDATA	8.25741	13.6035	0.720215	0	1	1	no	OK	17.4529	19.589	0.166573	-0.304985	0.760378	1	no
13103.m02100	LOC_Os03g17570.5	=	response regulator receiver domain containing protein, expressed	chr03:9742436-9767626	LOWDATA	2.61637	1.83143	-0.5146	0	1	1	no	OK	8.31507	6.16423	-0.431809	0.411731	0.680537	0.885541	no	OK	2.05823	1.69793	-0.277626	0.0682796	0.945563	1	no	OK	3.36757	1.35154	-1.3171	0.644101	0.51951	1	no
13103.m02200	LOC_Os03g18370.1	=	MRH1, putative, expressed	chr03:10257510-10294596	LOWDATA	14.2086	7.66438	-0.890522	0	1	1	no	OK	21.878	9.9996	-1.12954	2.19688	0.028029	0.187225	no	LOWDATA	11.135	9.23494	-0.269929	0	1	1	no	OK	18.2935	11.3537	-0.688174	1.14707	0.251351	0.920079	no
13103.m02253	LOC_Os03g18820.1	=	glycosyltransferase, putative, expressed	chr03:10541104-10560761	LOWDATA	1.22716	0.666816	-0.879965	0	1	1	no	NOTEST	2.40723	1.83207	-0.393903	0.0154138	0.987702	1	no	LOWDATA	0.515506	0.497024	-0.0526754	0	1	1	no	LOWDATA	1.29343	2.05142	0.665416	0	1	1	no
13103.m02265	LOC_Os03g18930.1	=	hypothetical protein	chr03:10603796-10604801	LOWDATA	1.73415	2.12493	0.293189	0	1	1	no	LOWDATA	1.08034	5.08962	2.23607	0	1	1	no	NOTEST	0.103608	0.574491	2.47115	-0.400588	0.688723	1	no	NOTEST	0.154973	2.03591	3.71559	-0.500954	0.616403	1	no
13103.m02286	LOC_Os03g19120.1	=	MYB family transcription factor, putative	chr03:10671498-10712252	LOWDATA	1.06696	1.45932	0.45179	0	1	1	no	LOWDATA	1.62659	1.02548	-0.665544	0	1	1	no	LOWDATA	0.454434	0.367227	-0.3074	0	1	1	no	LOWDATA	0.79966	1.07435	0.426005	0	1	1	no
13103.m02296	LOC_Os03g19220.2	=	expressed protein	chr03:10802810-10805490	LOWDATA	18.6762	15.5772	-0.261765	0	1	1	no	LOWDATA	25.6949	12.1733	-1.07776	0	1	1	no	LOWDATA	14.1707	13.77	-0.0413813	0	1	1	no	LOWDATA	26.7872	13.8518	-0.95147	0	1	1	no
13103.m02477	LOC_Os03g20650.1	=	bZIP transcription factor domain containing protein, expressed	chr03:11671497-11695878	LOWDATA	2.33048	1.26563	-0.880775	0	1	1	no	LOWDATA	1.35355	0.868368	-0.640375	0	1	1	no	LOWDATA	1.76439	1.20526	-0.549826	0	1	1	no	LOWDATA	2.22986	2.14037	-0.0590932	0	1	1	no
13103.m02486	LOC_Os03g20730.1	=	chaperone protein dnaJ, putative, expressed	chr03:11721687-11730314	LOWDATA	7.48691	5.64579	-0.407195	0	1	1	no	LOWDATA	0.711889	3.24553	2.18873	0	1	1	no	OK	3.66217	10.6306	1.53745	-0.528373	0.597241	1	no	OK	2.46508	9.65905	1.97025	-0.230869	0.817417	1	no
13103.m02565	LOC_Os03g21419.1	=	retrotransposon protein, putative, Ty1-copia subclass, expressed	chr03:12233827-12248805	LOWDATA	0.123311	0.151342	0.295512	0	1	1	no	NOTEST	0.3799	0.025279	-3.90961	0.400912	0.688485	1	no	LOWDATA	0.0231888	0.0285073	0.297902	0	1	1	no	LOWDATA	0.0745099	0.0594156	-0.32659	0	1	1	no
13103.m02631	LOC_Os03g21914.1	=	ATP binding protein, putative, expressed	chr03:12522506-12550916	LOWDATA	8.8564	9.91373	0.162707	0	1	1	no	OK	10.9877	6.36282	-0.788152	1.30562	0.191681	0.512628	no	FAIL	10.1369	11.9723	0	0	1	1	no	LOWDATA	12.1175	9.31971	-0.378735	0	1	1	no
13103.m02632	LOC_Os03g21930.1	=	hypothetical protein	chr03:12522506-12550916	LOWDATA	0.378429	0.234631	-0.689626	0	1	1	no	NOTEST	0.550119	0	0	0	1	1	no	FAIL	0	0.346208	0	0	1	1	no	NOTEST	0	0	0	0	1	1	no
13103.m02633	LOC_Os03g21940.1	=	60S ribosomal protein L19-3, putative, expressed	chr03:12522506-12550916	LOWDATA	168.663	155.099	-0.12095	0	1	1	no	OK	137.107	133.918	-0.0339481	0.0755703	0.939761	0.9959	no	FAIL	222.208	168.725	0	0	1	1	no	LOWDATA	228.464	123.672	-0.885451	0	1	1	no
13103.m02634	LOC_Os03g21950.1	=	fumarate hydratase, mitochondrial precursor, putative, expressed	chr03:12522506-12550916	LOWDATA	9.31331	16.4171	0.817833	0	1	1	no	LOWDATA	8.1705	5.54512	-0.559205	0	1	1	no	FAIL	8.88259	16.9144	0	0	1	1	no	LOWDATA	9.82973	11.8704	0.272149	0	1	1	no
13103.m02658	LOC_Os03g22120.1	=	sucrose synthase, putative, expressed	chr03:12673179-12679375	LOWDATA	11.7182	29.0731	1.31094	0	1	1	no	LOWDATA	13.35	17.1132	0.358268	0	1	1	no	LOWDATA	7.49135	23.5335	1.65142	0	1	1	no	LOWDATA	13.1091	31.0048	1.24192	0	1	1	no
13103.m02692	LOC_Os03g22390.1	=	universal stress protein domain containing protein, putative, expressed	chr03:12813297-12833768	LOWDATA	1.96779	1.75698	-0.163479	0	1	1	no	LOWDATA	0.650675	0.832657	0.355784	0	1	1	no	LOWDATA	0.968069	1.97737	1.0304	0	1	1	no	LOWDATA	1.15655	1.75375	0.600621	0	1	1	no
13103.m02693	LOC_Os03g22400.1	=	ulp1 protease family protein, putative, expressed	chr03:12813297-12833768	LOWDATA	2.77705	2.59498	-0.0978319	0	1	1	no	LOWDATA	0.716481	0.0647813	-3.46728	0	1	1	no	OK	3.13197	6.30505	1.00944	-0.712219	0.476329	0.971405	no	OK	4.46028	5.22662	0.228742	-0.180722	0.856586	1	no
13103.m02694	LOC_Os03g22400.2	=	ulp1 protease family protein, putative, expressed	chr03:12813297-12833768	LOWDATA	0.191471	0.874536	2.19139	0	1	1	no	LOWDATA	0.798821	0.493052	-0.696132	0	1	1	no	NOTEST	0.616613	0.578695	-0.0915606	0.00967342	0.992282	1	no	NOTEST	0.563232	0.260907	-1.11019	0.0646015	0.948491	1	no
13103.m02695	LOC_Os03g22400.3	=	ulp1 protease family protein, putative, expressed	chr03:12813297-12833768	LOWDATA	0.124797	0.112379	-0.151215	0	1	1	no	LOWDATA	0.405328	0.128979	-1.65196	0	1	1	no	NOTEST	0	0.0349434	1e+300	1e+300	0.496304	1	no	LOWDATA	0.104797	0.134139	0.356123	0	1	1	no
13103.m02736	LOC_Os03g22720.2	=	expressed protein	chr03:13121284-13123214	LOWDATA	0	0	0	0	1	1	no	OK	4.50126	5.29164	0.233387	-0.383265	0.701523	0.896466	no	NOTEST	0	0	0	0	1	1	no	NOTEST	1.63154	2.56342	0.651833	-0.876508	0.380754	1	no
13103.m02737	LOC_Os03g22720.3	=	expressed protein	chr03:13121284-13123214	LOWDATA	0	0	5.32571e-315	0	1	1	no	OK	16.5916	21.7671	0.391699	-0.697211	0.485671	0.77018	no	NOTEST	0	0	0	0	1	1	no	OK	8.71676	8.33797	-0.0640959	0.102291	0.918526	1	no
13103.m02842	LOC_Os03g24040.1	=	seven in absentia protein family domain containing protein, expressed	chr03:13632445-13654007	LOWDATA	4.17595	11.0423	1.40287	0	1	1	no	LOWDATA	6.11055	6.2301	0.0279535	0	1	1	no	OK	3.40753	10.3451	1.60214	-2.18804	0.0286665	0.260088	no	OK	7.62656	7.40347	-0.0428305	0.0602616	0.951947	1	no
13103.m02843	LOC_Os03g24050.1	=	expressed protein	chr03:13632445-13654007	LOWDATA	0.0161796	0.0200632	0.310374	0	1	1	no	NOTEST	0.0235201	0	-1e+300	-1e+300	0.158655	1	no	NOTEST	0.0229745	0	-1e+300	-1e+300	0.124107	1	no	NOTEST	0	0	0	0	1	1	no
13103.m03079	LOC_Os03g26220.1	=	expressed protein	chr03:15000996-15006933	LOWDATA	0.624535	1.07029	0.777145	0	1	1	no	LOWDATA	0.824886	1.17558	0.511111	0	1	1	no	OK	1.96703	1.3632	-0.529024	0.163247	0.870324	1	no	NOTEST	2.72503	2.43187	-0.16421	0.142201	0.886922	1	no
13103.m03183	LOC_Os03g27260.1	=	40S ribosomal protein S6, putative, expressed	chr03:15602476-15664379	LOWDATA	59.1779	57.6922	-0.0366804	0	1	1	no	OK	70.024	55.7562	-0.328718	0.775567	0.438005	0.738572	no	LOWDATA	72.7785	84.1213	0.208959	0	1	1	no	OK	93.4321	69.5801	-0.425244	0.818395	0.413132	1	no
13103.m03231	LOC_Os03g27590.2	=	OsSCP18 - Putative Serine Carboxypeptidase homologue, expressed	chr03:15762048-15827897	LOWDATA	0.994234	0.63302	-0.651335	0	1	1	no	NOTEST	0.201314	0.455345	1.17751	-0.962906	0.335595	1	no	LOWDATA	0.297581	0.182903	-0.702204	0	1	1	no	NOTEST	0.137675	1.03465	2.9098	-0.850565	0.395011	1	no
13103.m03230	LOC_Os03g27590.1	=	OsSCP18 - Putative Serine Carboxypeptidase homologue, expressed	chr03:15762048-15827897	LOWDATA	6.42867	8.6266	0.424273	0	1	1	no	NOTEST	3.35116	2.0641	-0.699149	1.05345	0.292137	1	no	OK	6.90554	8.41861	0.285827	-0.371799	0.710042	1	no	OK	4.60669	6.2297	0.43543	-0.529975	0.596129	1	no
13103.m03551	LOC_Os03g31110.2	=	transposon protein, putative, unclassified, expressed	chr03:17713615-17733633	LOWDATA	0.541365	0.648227	0.259899	0	1	1	no	NOTEST	0.363857	0	0	0	1	1	no	LOWDATA	0.298034	0.391908	0.395042	0	1	1	no	LOWDATA	0.299185	0.389103	0.379112	0	1	1	no
13103.m03550	LOC_Os03g31110.1	=	transposon protein, putative, unclassified, expressed	chr03:17713615-17733633	LOWDATA	0.819065	1.02395	0.322102	0	1	1	no	NOTEST	1.56416	0.95435	-0.7128	0.521276	0.602174	1	no	LOWDATA	0.853758	0.816967	-0.0635503	0	1	1	no	LOWDATA	0.910606	0.525057	-0.794352	0	1	1	no
13103.m03630	LOC_Os03g31750.2	=	pyruvate, phosphate dikinase, chloroplast precursor, putative, expressed	chr03:18117427-18176816	LOWDATA	0.262035	0.393167	0.585383	0	1	1	no	LOWDATA	0.0836681	0.0866862	0.0511247	0	1	1	no	NOTEST	0	0	0	0	1	1	no	NOTEST	0	0	0	0	1	1	no
13103.m03631	LOC_Os03g31760.1	=	expressed protein	chr03:18117427-18176816	LOWDATA	0.0470786	0.175137	1.89534	0	1	1	no	NOTEST	0.0958129	0.0451464	-1.08561	0.223596	0.823072	1	no	NOTEST	0	0.0946609	1e+300	1e+300	0.0333765	1	no	NOTEST	0	0	0	0	1	1	no
13103.m03633	LOC_Os03g31780.1	=	conserved hypothetical protein	chr03:18117427-18176816	LOWDATA	0.887606	2.82043	1.66792	0	1	1	no	LOWDATA	2.24239	1.97966	-0.17978	0	1	1	no	NOTEST	0	0	0	0	1	1	no	NOTEST	0	0	0	0	1	1	no
13103.m03709	LOC_Os03g32590.2	=	transcription initiation factor, putative, expressed	chr03:18637301-18646389	LOWDATA	0.191154	0.390467	1.03047	0	1	1	no	LOWDATA	0.110625	0.110043	-0.00761171	0	1	1	no	LOWDATA	0.0447776	0.109215	1.28632	0	1	1	no	NOTEST	0	0	0	0	1	1	no
13103.m03880	LOC_Os03g34300.1	=	TMS membrane protein/tumour differentially expressed protein, putative, expressed	chr03:19482720-19530225	LOWDATA	5.91342	9.46593	0.678751	0	1	1	no	LOWDATA	6.82351	6.58845	-0.050575	0	1	1	no	LOWDATA	8.23157	3.55458	-1.21149	0	1	1	no	LOWDATA	3.14532	9.0759	1.52883	0	1	1	no
13103.m04027	LOC_Os03g36920.1	=	disease resistance protein, putative, expressed	chr03:20483443-20495776	LOWDATA	0.279502	0.197904	-0.498057	0	1	1	no	NOTEST	0.38127	0.0125746	-4.92222	1.88129	0.059932	1	no	LOWDATA	0.17878	0.169876	-0.073702	0	1	1	no	LOWDATA	0.138807	0.249646	0.846805	0	1	1	no
13103.m04073	LOC_Os03g37470.1	=	MATE efflux family protein, putative, expressed	chr03:20723897-20798378	LOWDATA	1.74154	0.959192	-0.860476	0	1	1	no	LOWDATA	1.57435	0.648903	-1.27868	0	1	1	no	OK	3.01296	1.70672	-0.819952	0.440548	0.65954	1	no	NOTEST	2.21031	2.08885	-0.0815397	0.0358397	0.97141	1	no
13103.m04079	LOC_Os03g37570.1	=	expressed protein	chr03:20836458-20845392	LOWDATA	0.546271	0.971648	0.830818	0	1	1	no	LOWDATA	0.42425	0.329416	-0.365003	0	1	1	no	LOWDATA	0.133897	0.608382	2.18385	0	1	1	no	LOWDATA	0.450211	0.842313	0.903755	0	1	1	no
13103.m04107	LOC_Os03g37830.1	=	potassium transporter, putative, expressed	chr03:20977127-20984269	LOWDATA	10.7201	16.5721	0.628437	0	1	1	no	LOWDATA	11.4794	8.70955	-0.398372	0	1	1	no	OK	7.38341	13.0829	0.825323	-1.27135	0.203606	0.743812	no	OK	3.92404	8.50155	1.11539	-1.85259	0.0639414	0.487628	no
13103.m04399	LOC_Os03g40780.1	=	transport protein-related, putative, expressed	chr03:22668948-22674280	LOWDATA	6.10555	5.16581	-0.241126	0	1	1	no	OK	7.63823	2.7946	-1.4506	1.42498	0.154162	0.464682	no	LOWDATA	5.36742	7.34575	0.452679	0	1	1	no	LOWDATA	8.99092	6.94633	-0.372216	0	1	1	no
13103.m04595	LOC_Os03g42750.2	=	roothairless 1, putative, expressed	chr03:23795331-23806523	LOWDATA	0.127115	0.243678	0.938839	0	1	1	no	NOTEST	0.398637	0	0	0	1	1	no	LOWDATA	0.196094	0.408854	1.06004	0	1	1	no	NOTEST	0	0	0	0	1	1	no
13103.m04718	LOC_Os03g43860.1	=	SNF7 domain containing protein, putative, expressed	chr03:24594698-24598455	LOWDATA	20.6171	22.0017	0.0937765	0	1	1	no	OK	38.9078	14.0345	-1.47108	2.68925	0.00716128	0.0809916	no	OK	11.0168	15.8029	0.520481	-0.879658	0.379044	0.918851	no	LOWDATA	17.0926	11.0606	-0.627944	0	1	1	no
13103.m04724	LOC_Os03g43910.1	=	expressed protein	chr03:24636249-24639549	LOWDATA	12.0451	12.8723	0.0958293	0	1	1	no	LOWDATA	10.6332	11.6224	0.128328	0	1	1	no	OK	4.78256	6.60614	0.466024	-0.603001	0.546508	1	no	OK	5.83008	6.07824	0.0601361	-0.0850446	0.932226	1	no
13103.m04788	LOC_Os03g44500.1	=	serine/threonine protein phosphatase, putative, expressed	chr03:25031602-25064966	LOWDATA	6.49732	10.9026	0.746753	0	1	1	no	OK	6.70684	5.52914	-0.278578	0.401645	0.687945	0.890519	no	OK	4.98509	11.193	1.1669	-1.40108	0.161191	0.673732	no	OK	7.39644	12.3742	0.742431	-1.24311	0.213826	0.867846	no
13103.m04789	LOC_Os03g44510.1	=	transposon protein, putative, CACTA, En/Spm sub-class	chr03:25031602-25064966	LOWDATA	0.00683996	0.00848175	0.310374	0	1	1	no	NOTEST	0.0397728	0	-1e+300	-1e+300	0.0786496	1	no	NOTEST	0	0	0	0	1	1	no	NOTEST	0	0	0	0	1	1	no
13103.m04792	LOC_Os03g44530.1	=	GTPase of unknown function domain containing protein, putative, expressed	chr03:25031602-25064966	LOWDATA	0.259823	1.74044	2.74385	0	1	1	no	NOTEST	0	0.694966	1e+300	1e+300	0.201012	1	no	NOTEST	0.749719	1.16667	0.637971	-0.0894637	0.928713	1	no	NOTEST	1.74444	0	-1e+300	-1e+300	0.0103625	1	no
13103.m04791	LOC_Os03g44530.2	=	GTPase of unknown function domain containing protein, putative, expressed	chr03:25031602-25064966	LOWDATA	4.29435	1.46313	-1.55339	0	1	1	no	OK	5.29308	2.91471	-0.860753	0.934411	0.350092	0.672024	no	OK	4.3698	2.5433	-0.780865	0.427713	0.66886	1	no	OK	5.44677	3.75062	-0.538272	0.412108	0.68026	1	no
13103.m04794	LOC_Os03g44540.1	=	nuclear transcription factor Y subunit, putative, expressed	chr03:25067140-25073979	LOWDATA	3.7163	3.13602	-0.244935	0	1	1	no	LOWDATA	3.36569	1.91654	-0.812395	0	1	1	no	LOWDATA	4.07991	4.08001	3.53098e-05	0	1	1	no	LOWDATA	2.7263	2.61678	-0.0591504	0	1	1	no
13103.m04884	LOC_Os03g45340.1	=	hsp20/alpha crystallin family protein, putative, expressed	chr03:25584214-25614312	LOWDATA	12.229	8.96511	-0.447909	0	1	1	no	OK	14.511	8.1146	-0.838554	0.767324	0.442889	0.74179	no	OK	11.3913	12.1135	0.0886799	-0.0710041	0.943394	1	no	LOWDATA	22.0165	13.2651	-0.730947	0	1	1	no
13103.m04885	LOC_Os03g45344.1	=	expressed protein	chr03:25584214-25614312	LOWDATA	5.67453	5.51889	-0.0401234	0	1	1	no	OK	8.08728	4.26817	-0.922036	1.13442	0.256617	0.58855	no	OK	6.32017	5.94926	-0.0872537	0.113384	0.909726	1	no	OK	9.48931	6.531	-0.538999	0.815337	0.41488	1	no
13103.m04908	LOC_Os03g45619.1	=	cytochrome P450, putative, expressed	chr03:25731183-25767460	LOWDATA	18.8463	5.6611	-1.73513	0	1	1	no	OK	29.7555	15.0067	-0.98755	1.68745	0.0915173	0.35959	no	OK	18.7416	19.882	0.085213	-0.163166	0.870388	1	no	LOWDATA	33.3983	19.8183	-0.752941	0	1	1	no
13103.m04939	LOC_Os03g45970.1	=	expressed protein	chr03:25970240-26033382	LOWDATA	12.1809	15.5062	0.348219	0	1	1	no	NOTEST	1.73514	0.647632	-1.42181	0.572257	0.567148	1	no	OK	5.09287	6.5635	0.365988	-0.418383	0.675667	1	no	NOTEST	1.58423	2.26469	0.51553	-0.416253	0.677225	1	no
13103.m04951	LOC_Os03g46070.1	=	thaumatin, putative, expressed	chr03:25970240-26033382	LOWDATA	13.7474	123.985	3.17293	0	1	1	no	OK	13.5129	17.5325	0.375696	-0.0252912	0.979823	1	no	OK	21.7757	167.192	2.94071	-1.175	0.239995	0.791728	no	OK	13.0389	64.8184	2.31358	-3.35469	0.000794546	0.021892	yes
13103.m05006	LOC_Os03g46490.1	=	40S ribosomal protein S21, putative, expressed	chr03:26301599-26305947	LOWDATA	29.7445	28.166	-0.0786684	0	1	1	no	LOWDATA	37.4465	30.0771	-0.316163	0	1	1	no	LOWDATA	64.3802	32.9416	-0.966706	0	1	1	no	OK	41.0011	25.3762	-0.692185	1.36421	0.172502	0.789373	no
13103.m05191	LOC_Os03g48104.1	=	expressed protein	chr03:27352584-27381098	LOWDATA	0.620041	0.826193	0.414116	0	1	1	no	LOWDATA	0.761317	0.173541	-2.13322	0	1	1	no	LOWDATA	2.11889	1.89796	-0.158866	0	1	1	no	LOWDATA	1.83799	2.22	0.272434	0	1	1	no
13103.m05264	LOC_Os03g48710.3	=	expressed protein	chr03:27755964-27760177	LOWDATA	0.153839	0.34385	1.16035	0	1	1	no	LOWDATA	0.152539	0.610714	2.00132	0	1	1	no	NOTEST	0	0	0	0	1	1	no	LOWDATA	0.163116	0.497206	1.60794	0	1	1	no
13103.m05424	LOC_Os03g49900.1	=	zinc finger, C3HC4 type domain containing protein, expressed	chr03:28441638-28476745	LOWDATA	2.60575	5.18069	0.991448	0	1	1	no	OK	5.2485	5.20639	-0.0116223	0.0101583	0.991895	1	no	LOWDATA	0.95801	2.03985	1.09035	0	1	1	no	NOTEST	1.25851	0	0	0	1	1	no
13103.m05427	LOC_Os03g49930.1	=	pentatricopeptide, putative	chr03:28441638-28476745	LOWDATA	0.0215791	0.0535174	1.31037	0	1	1	no	NOTEST	0.094108	0	-1e+300	-1e+300	0.144422	1	no	NOTEST	0	0	0	0	1	1	no	NOTEST	0	0	0	0	1	1	no
13103.m05430	LOC_Os03g49960.2	=	expressed protein	chr03:28441638-28476745	LOWDATA	1.89167	3.00897	0.669613	0	1	1	no	NOTEST	0	0	0	0	1	1	no	NOTEST	0	0	0	0	1	1	no	NOTEST	0.266645	0	0	0	1	1	no
13103.m05429	LOC_Os03g49960.1	=	expressed protein	chr03:28441638-28476745	LOWDATA	0.945827	3.20981	1.76284	0	1	1	no	NOTEST	2.79369	0.605773	-2.20532	0.880303	0.378695	1	no	LOWDATA	2.76548	3.83324	0.471035	0	1	1	no	LOWDATA	2.60757	4.99649	0.938209	0	1	1	no
13103.m05465	LOC_Os03g50270.1	=	expressed protein	chr03:28644132-28663607	LOWDATA	18.9913	11.901	-0.674257	0	1	1	no	OK	31.7889	27.0463	-0.233092	0.48307	0.629046	0.857737	no	LOWDATA	26.0183	12.2418	-1.0877	0	1	1	no	LOWDATA	22.3956	22.3386	-0.00367528	0	1	1	no
13103.m05466	LOC_Os03g50280.1	=	GLTP domain containing protein, putative, expressed	chr03:28644132-28663607	LOWDATA	3.38494	5.65176	0.73957	0	1	1	no	LOWDATA	5.18485	3.39954	-0.608963	0	1	1	no	LOWDATA	3.16803	3.85172	0.281917	0	1	1	no	OK	7.00383	6.87033	-0.0277663	0.00410619	0.996724	1	no
13103.m05497	LOC_Os03g50530.2	=	expressed protein	chr03:28839874-28874152	LOWDATA	2.41523	1.43498	-0.751131	0	1	1	no	NOTEST	0	0	0	0	1	1	no	LOWDATA	6.73326	10.18	0.59636	0	1	1	no	LOWDATA	7.79874	8.1582	0.0650108	0	1	1	no
13103.m05501	LOC_Os03g50560.3	=	RNA recognition motif containing protein, putative, expressed	chr03:28839874-28874152	LOWDATA	1.1025	0.40091	-1.45942	0	1	1	no	LOWDATA	0.312153	0.499829	0.679181	0	1	1	no	LOWDATA	0.0806356	0.125703	0.640531	0	1	1	no	LOWDATA	0.962782	0.521561	-0.884373	0	1	1	no
13103.m05500	LOC_Os03g50560.1	=	RNA recognition motif containing protein, putative, expressed	chr03:28839874-28874152	LOWDATA	0.656883	1.41858	1.11074	0	1	1	no	LOWDATA	5.33968	3.39231	-0.654485	0	1	1	no	LOWDATA	1.82606	0.424535	-2.10478	0	1	1	no	LOWDATA	4.25348	4.53619	0.0928367	0	1	1	no
13103.m05535	LOC_Os03g50900.1	=	transposon protein, putative, unclassified, expressed	chr03:29069757-29075025	LOWDATA	0.191267	0.28958	0.598379	0	1	1	no	NOTEST	0.68516	0.174867	-1.97018	1.14645	0.251607	1	no	OK	1.36187	2.2309	0.712037	-0.856618	0.391656	0.92686	no	NOTEST	1.2915	1.39285	0.108993	-0.130469	0.896195	1	no
13103.m05574	LOC_Os03g51250.1	=	adenylyl cyclase-associated protein, putative, expressed	chr03:29287008-29559081	LOWDATA	3.03377	1.04698	-1.53488	0	1	1	no	LOWDATA	6.60896	3.10184	-1.0913	0	1	1	no	FAIL	6.73371	9.52752	0	0	1	1	no	FAIL	5.25746	16.0698	0	0	1	1	no
13103.m05622	LOC_Os03g51620.1	=	DUF221 domain containing protein, expressed	chr03:29287008-29559081	LOWDATA	0.017691	0.0658122	1.89533	0	1	1	no	LOWDATA	3.9862	1.07439	-1.8915	0	1	1	no	FAIL	0	0.0565874	0	0	1	1	no	FAIL	2.27761	1.37028	0	0	1	1	no
13103.m05693	LOC_Os03g52280.1	=	expressed protein	chr03:30015615-30017958	LOWDATA	0.325271	0.740522	1.1869	0	1	1	no	NOTEST	0	0	0	0	1	1	no	NOTEST	0	0	0	0	1	1	no	NOTEST	0	0	0	0	1	1	no
13103.m05745	LOC_Os03g52690.1	=	CBS domain containing membrane protein, putative, expressed	chr03:30199388-30203567	LOWDATA	1.17634	0.712309	-0.723728	0	1	1	no	LOWDATA	1.06711	0.73938	-0.529328	0	1	1	no	OK	3.99879	1.62177	-1.302	0.155818	0.876176	1	no	LOWDATA	2.60363	1.83336	-0.506037	0	1	1	no
13103.m05822	LOC_Os03g53340.3	=	HSF-type DNA-binding domain containing protein, expressed	chr03:30596852-30600090	LOWDATA	0	0	-1e+300	0	1	1	no	NOTEST	0	0	0	0	1	1	no	NOTEST	0	0	0	0	1	1	no	NOTEST	0	0.145116	1e+300	1e+300	0.0304117	1	no
13103.m05939	LOC_Os03g54200.2	=	expressed protein	chr03:31070462-31160380	LOWDATA	16.528	19.5948	0.245563	0	1	1	no	LOWDATA	18.6721	18.2545	-0.0326262	0	1	1	no	LOWDATA	9.49363	17.0074	0.841134	0	1	1	no	LOWDATA	22.1933	13.8644	-0.678741	0	1	1	no
13103.m05984	LOC_Os03g55080.1	=	OsWRKY3 - Superfamily of TFs having WRKY and zinc finger domains, expressed	chr03:31308675-31332244	LOWDATA	0.771133	1.04164	0.433807	0	1	1	no	NOTEST	0.475977	0	0	0	1	1	no	NOTEST	0	0.233552	1e+300	1e+300	0.47338	1	no	NOTEST	0	0	0	0	1	1	no
13103.m06136	LOC_Os03g56280.1	=	lactate/malate dehydrogenase, putative, expressed	chr03:32056575-32088524	LOWDATA	61.1071	42.025	-0.54009	0	1	1	no	LOWDATA	82.7536	49.4962	-0.741505	0	1	1	no	LOWDATA	64.6004	45.6136	-0.50208	0	1	1	no	LOWDATA	70.0366	71.7556	0.034983	0	1	1	no
13103.m06314	LOC_Os03g57580.1	=	expressed protein	chr03:32822000-32827793	LOWDATA	0.134611	0.123917	-0.119425	0	1	1	no	NOTEST	0.128896	0.0498486	-1.37058	1.24129	0.2145	1	no	NOTEST	0.00920408	0.0342224	1.8946	-1.036	0.300203	1	no	NOTEST	0	0	0	0	1	1	no
13103.m06372	LOC_Os03g58040.1	=	glutamate dehydrogenase protein, putative, expressed	chr03:33026210-33053291	LOWDATA	45.8609	34.858	-0.395774	0	1	1	no	OK	13.0329	4.83264	-1.43127	1.46614	0.142611	0.446592	no	OK	43.9713	39.3003	-0.162024	0.309242	0.757138	1	no	LOWDATA	32.985	43.9249	0.413228	0	1	1	no
13103.m06375	LOC_Os03g58050.1	=	ribosomal protein S13p/S18e, putative, expressed	chr03:33026210-33053291	LOWDATA	78.8256	94.386	0.259909	0	1	1	no	OK	77.8736	67.8593	-0.198586	0.472767	0.636379	0.861909	no	OK	110.239	78.3646	-0.492356	1.09654	0.272841	0.827125	no	OK	112.458	73.1805	-0.619853	1.54842	0.12152	0.683642	no
13103.m06449	LOC_Os03g58710.2	=	riboflavin biosynthesis protein-related, putative, expressed	chr03:33426091-33429585	LOWDATA	1.93055	2.39141	0.308854	0	1	1	no	NOTEST	2.70324	1.67939	-0.686751	1.06837	0.285355	1	no	NOTEST	1.48285	1.28427	-0.207426	0.262776	0.792723	1	no	NOTEST	1.09947	1.82861	0.733943	-0.966838	0.333625	1	no
13103.m06448	LOC_Os03g58710.1	=	riboflavin biosynthesis protein-related, putative, expressed	chr03:33426091-33429585	LOWDATA	1.10559	0.577399	-0.937177	0	1	1	no	NOTEST	2.77641	0.401988	-2.788	3.71937	0.000199719	1	no	OK	1.7988	3.49973	0.960211	-1.28765	0.197868	0.735551	no	OK	3.45341	2.05153	-0.751321	1.09765	0.272356	0.945056	no
13103.m06496	LOC_Os03g59160.1	=	elongation factor P, putative, expressed	chr03:33631448-33685228	LOWDATA	2.22666	2.79297	0.326914	0	1	1	no	LOWDATA	2.74403	0.870389	-1.65656	0	1	1	no	OK	3.31885	2.90722	-0.191039	0.121073	0.903633	1	no	LOWDATA	2.12916	4.09587	0.943888	0	1	1	no
13103.m06601	LOC_Os03g60130.1	=	transcription elongation factor protein, putative, expressed	chr03:34187751-34212083	LOWDATA	4.52107	12.1267	1.42345	0	1	1	no	OK	8.59119	12.2824	0.515668	-0.706613	0.479807	0.766254	no	OK	6.24378	10.7297	0.781115	-0.949573	0.342329	0.892209	no	OK	6.66874	9.73539	0.545824	-0.636365	0.524539	1	no
13103.m06603	LOC_Os03g60150.2	=	protein kinase domain containing protein, expressed	chr03:34187751-34212083	LOWDATA	1.88215	2.49102	0.404358	0	1	1	no	NOTEST	1.96222	0.806353	-1.28301	1.70181	0.0887916	1	no	NOTEST	1.1008	0.602941	-0.868463	0.100925	0.91961	1	no	NOTEST	1.20899	1.19931	-0.011595	0.0124457	0.99007	1	no
13103.m06604	LOC_Os03g60150.1	=	protein kinase domain containing protein, expressed	chr03:34187751-34212083	LOWDATA	17.3143	18.328	0.082085	0	1	1	no	OK	15.5973	19.0649	0.289622	-0.440389	0.659655	0.873741	no	OK	12.1015	15.7375	0.379022	-0.643202	0.520093	0.992354	no	OK	12.6148	17.7133	0.489714	-0.792538	0.428047	1	no
13103.m06618	LOC_Os03g60300.1	=	expressed protein	chr03:34282727-34307689	LOWDATA	1.26931	0.829788	-0.613226	0	1	1	no	NOTEST	0.506664	0	0	0	1	1	no	OK	1.68717	1.08871	-0.631989	0.184817	0.853372	1	no	NOTEST	1.45803	2.43003	0.73695	-0.113828	0.909374	1	no
13103.m06652	LOC_Os03g60600.1	=	zinc knuckle domain containing protein, expressed	chr03:34399909-34589387	LOWDATA	5.92994	5.4194	-0.129885	0	1	1	no	LOWDATA	4.03082	4.77003	0.242927	0	1	1	no	LOWDATA	7.80403	6.80212	-0.198235	0	1	1	no	LOWDATA	10.1106	3.92543	-1.36495	0	1	1	no
13103.m06654	LOC_Os03g60610.3	=	SEC14 cytosolic factor family protein, putative, expressed	chr03:34399909-34589387	LOWDATA	2.37255	2.3742	0.00100632	0	1	1	no	LOWDATA	0.73318	1.32788	0.856885	0	1	1	no	NOTEST	0	0	0	0	1	1	no	LOWDATA	1.75302	7.60754	2.11759	0	1	1	no
13103.m06656	LOC_Os03g60610.2	=	SEC14 cytosolic factor family protein, putative, expressed	chr03:34399909-34589387	LOWDATA	0.746184	3.36589	2.17338	0	1	1	no	LOWDATA	3.52542	1.97808	-0.833692	0	1	1	no	LOWDATA	0.727023	0.845022	0.216986	0	1	1	no	LOWDATA	0.624502	1.0446	0.742168	0	1	1	no
13103.m06655	LOC_Os03g60610.1	=	SEC14 cytosolic factor family protein, putative, expressed	chr03:34399909-34589387	LOWDATA	3.14148	3.25727	0.0522197	0	1	1	no	LOWDATA	3.92626	2.42877	-0.692931	0	1	1	no	LOWDATA	5.25417	8.22045	0.645754	0	1	1	no	LOWDATA	4.38952	0.866551	-2.34071	0	1	1	no
13103.m06667	LOC_Os03g60720.1	=	expansin precursor, putative, expressed	chr03:34399909-34589387	LOWDATA	12.4946	12.2053	-0.0337973	0	1	1	no	LOWDATA	19.6296	19.7613	0.00964856	0	1	1	no	LOWDATA	11.3428	12.2817	0.114728	0	1	1	no	LOWDATA	18.614	15.9797	-0.220148	0	1	1	no
13103.m06670	LOC_Os03g60740.1	=	expressed protein	chr03:34399909-34589387	LOWDATA	12.906	1.70606	-2.9193	0	1	1	no	LOWDATA	13.4974	10.6328	-0.344161	0	1	1	no	LOWDATA	14.3411	16.7047	0.220094	0	1	1	no	LOWDATA	8.58165	15.6075	0.862912	0	1	1	no
13103.m06681	LOC_Os03g60820.1	=	transporter, major facilitator superfamily domain containing protein, expressed	chr03:34399909-34589387	LOWDATA	4.67721	0.961592	-2.28215	0	1	1	no	LOWDATA	2.18566	0.811465	-1.42947	0	1	1	no	LOWDATA	0.187488	5.39223	4.84601	0	1	1	no	OK	0	0	0	0	1	1	no
13103.m06691	LOC_Os03g60890.1	=	calmodulin binding protein, putative, expressed	chr03:34590223-34618496	LOWDATA	0.389465	0.500367	0.361494	0	1	1	no	LOWDATA	0.448119	0.298924	-0.584101	0	1	1	no	LOWDATA	0.085599	0.175367	1.03471	0	1	1	no	LOWDATA	0.1454	0.893955	2.62018	0	1	1	no
13103.m06698	LOC_Os03g60950.1	=	expressed protein	chr03:34626460-34628134	LOWDATA	0.156254	0.0659761	-1.24388	0	1	1	no	NOTEST	0.661062	0.138498	-2.25492	0.0795037	0.936632	1	no	LOWDATA	0.0352458	0.109062	1.62963	0	1	1	no	LOWDATA	0.0705974	0.141438	1.00248	0	1	1	no
13103.m06769	LOC_Os03g61470.1	=	uncharacterized Cys-rich domain containing protein, putative, expressed	chr03:34863316-34877441	LOWDATA	1.56376	1.76672	0.176051	0	1	1	no	NOTEST	1.38062	0.337067	-2.03421	2.02023	0.0433591	1	no	LOWDATA	2.45963	0.397114	-2.63082	0	1	1	no	NOTEST	0.528321	2.57948	2.2876	-0.467534	0.640118	1	no
13103.m06872	LOC_Os03g62240.1	=	expressed protein	chr03:35231123-35257427	LOWDATA	3.29821	0.436607	-2.91728	0	1	1	no	OK	9.32628	0.941586	-3.30814	1.61793	0.105677	0.388579	no	LOWDATA	1.59697	2.02393	0.341821	0	1	1	no	LOWDATA	3.74962	0.816617	-2.19901	0	1	1	no
13103.m06874	LOC_Os03g62260.1	=	FAD binding domain containing protein, expressed	chr03:35231123-35257427	LOWDATA	1.42373	1.02086	-0.479897	0	1	1	no	NOTEST	2.05443	1.20981	-0.763957	0.11266	0.9103	1	no	OK	2.80932	2.58014	-0.122768	0.0214942	0.982851	1	no	OK	4.08192	2.98295	-0.452508	0.111732	0.911036	1	no
13103.m06880	LOC_Os03g62314.1	=	retrotransposon protein, putative, LINE subclass	chr03:35296864-35310304	LOWDATA	0.317757	0.70247	1.14452	0	1	1	no	NOTEST	0.448366	0.167145	-1.42358	1.82941	0.0673375	1	no	LOWDATA	0.224137	0.661616	1.56161	0	1	1	no	NOTEST	0.20645	0.251605	0.285367	-0.326101	0.744348	1	no
13103.m06886	LOC_Os03g62379.1	=	MYB family transcription factor, putative, expressed	chr03:35328105-35337145	LOWDATA	0.79382	0.887627	0.161142	0	1	1	no	LOWDATA	0.538877	0.133752	-2.01039	0	1	1	no	OK	1.58138	3.68215	1.21936	-0.257565	0.796743	1	no	NOTEST	2.10933	1.36852	-0.624165	0.22859	0.819188	1	no
13103.m06937	LOC_Os03g62680.1	=	hypothetical protein	chr03:35463056-35590661	LOWDATA	1.62792	2.29962	0.498367	0	1	1	no	FAIL	1.09104	1.13793	0	0	1	1	no	LOWDATA	2.16066	2.49037	0.204891	0	1	1	no	LOWDATA	2.59975	1.41016	-0.882518	0	1	1	no
13103.m06952	LOC_Os03g62780.1	=	S1 RNA binding domain containing protein, expressed	chr03:35463056-35590661	LOWDATA	8.28907	6.09221	-0.444245	0	1	1	no	FAIL	9.19866	7.71617	0	0	1	1	no	LOWDATA	0.500556	8.68443	4.11683	0	1	1	no	LOWDATA	13.3797	14.6452	0.130387	0	1	1	no
13103.m06953	LOC_Os03g62790.2	=	pirin, putative, expressed	chr03:35463056-35590661	LOWDATA	15.0285	49.6743	1.7248	0	1	1	no	FAIL	9.15936	6.33828	0	0	1	1	no	LOWDATA	15.2414	40.7509	1.41884	0	1	1	no	LOWDATA	9.75238	21.7978	1.16036	0	1	1	no
13103.m06961	LOC_Os03g62850.2	=	AMP-binding enzyme, putative, expressed	chr03:35463056-35590661	LOWDATA	0.73907	0.528982	-0.482491	0	1	1	no	FAIL	0.151464	1.78129	0	0	1	1	no	LOWDATA	0.290685	3.67274	3.65933	0	1	1	no	LOWDATA	2.05124	2.1669	0.0791379	0	1	1	no
13103.m06960	LOC_Os03g62850.1	=	AMP-binding enzyme, putative, expressed	chr03:35463056-35590661	LOWDATA	2.51035	8.39167	1.74107	0	1	1	no	FAIL	5.29653	0.984548	0	0	1	1	no	LOWDATA	4.83546	7.14997	0.564284	0	1	1	no	LOWDATA	1.38323	3.32713	1.26624	0	1	1	no
13103.m06964	LOC_Os03g62870.1	=	DNA-directed RNA polymerases I, II, and III subunit RPABC3, putative, expressed	chr03:35463056-35590661	LOWDATA	3.12875	2.25143	-0.474745	0	1	1	no	FAIL	1.52305	0.420472	0	0	1	1	no	LOWDATA	1.30855	0.233749	-2.48493	0	1	1	no	LOWDATA	1.13063	0.170883	-2.72604	0	1	1	no
13103.m13046	LOC_Os03g62870.4	=	DNA-directed RNA polymerases I, II, and III subunit RPABC3, putative, expressed	chr03:35463056-35590661	LOWDATA	0.799603	1.31507	0.717779	0	1	1	no	FAIL	0.659584	1.05745	0	0	1	1	no	NOTEST	1.01073	0	0	0	1	1	no	NOTEST	0	0	0	0	1	1	no
13103.m07061	LOC_Os03g63670.1	=	expressed protein	chr03:35957729-35978691	LOWDATA	2.60402	3.00312	0.20572	0	1	1	no	LOWDATA	4.69833	1.07253	-2.13113	0	1	1	no	LOWDATA	2.84938	2.27427	-0.325245	0	1	1	no	FAIL	0	0	0	0	1	1	no
13103.m07063	LOC_Os03g63690.1	=	BCCIP, putative, expressed	chr03:35957729-35978691	LOWDATA	3.38376	4.13755	0.290152	0	1	1	no	LOWDATA	2.5108	2.1322	-0.23581	0	1	1	no	LOWDATA	5.58137	6.82165	0.289501	0	1	1	no	FAIL	0	0	0	0	1	1	no
13103.m07066	LOC_Os03g63710.2	=	GTPase-activating protein, putative, expressed	chr03:35957729-35978691	LOWDATA	12.5709	9.97247	-0.334059	0	1	1	no	LOWDATA	9.73689	10.3674	0.0905222	0	1	1	no	LOWDATA	0.739252	17.5156	4.56643	0	1	1	no	FAIL	0	0	0	0	1	1	no
13103.m07065	LOC_Os03g63710.1	=	GTPase-activating protein, putative, expressed	chr03:35957729-35978691	LOWDATA	9.605	10.3305	0.105059	0	1	1	no	LOWDATA	14.2603	4.2612	-1.74267	0	1	1	no	LOWDATA	18.9054	6.01626	-1.65186	0	1	1	no	FAIL	0	0	0	0	1	1	no
13103.m07067	LOC_Os03g63720.1	=	exosome complex exonuclease, putative, expressed	chr03:35957729-35978691	LOWDATA	6.85787	3.69474	-0.89229	0	1	1	no	LOWDATA	5.53063	4.66456	-0.245703	0	1	1	no	LOWDATA	7.39324	6.34039	-0.221635	0	1	1	no	FAIL	0	0	0	0	1	1	no
13103.m07077	LOC_Os03g63770.5	=	RCD1, putative, expressed	chr03:35981879-36000409	LOWDATA	0.742615	0.704786	-0.0754295	0	1	1	no	NOTEST	0.715106	0.226581	-1.65813	1.89416	0.058204	1	no	NOTEST	0	0	0	0	1	1	no	NOTEST	0.47151	0.121952	-1.95097	0.0362746	0.971063	1	no
13103.m07105	LOC_Os03g64014.1	=	expressed protein	chr03:36151880-36176122	LOWDATA	1.79799	1.94632	0.114365	0	1	1	no	OK	3.27053	3.96537	0.277934	-0.1472	0.882974	0.97675	no	LOWDATA	0.299038	0.485571	0.699352	0	1	1	no	LOWDATA	1.36237	2.68456	0.978566	0	1	1	no
13103.m07107	LOC_Os03g64020.2	=	expressed protein	chr03:36151880-36176122	LOWDATA	21.436	23.1144	0.108758	0	1	1	no	OK	28.0461	16.4763	-0.767412	1.25145	0.210769	0.537337	no	LOWDATA	24.5751	47.7955	0.959679	0	1	1	no	LOWDATA	52.8327	49.5266	-0.0932278	0	1	1	no
13103.m07122	LOC_Os03g64190.1	=	la domain containing protein, putative, expressed	chr03:36231901-36264424	LOWDATA	4.02702	9.8393	1.28884	0	1	1	no	OK	4.953	3.24003	-0.612295	0.705038	0.480786	0.76706	no	LOWDATA	6.26095	9.40118	0.58646	0	1	1	no	OK	5.58024	7.37925	0.403146	-0.483972	0.628406	1	no
13103.m07155	LOC_Os03g64380.1	=	expressed protein	chr03:36377710-36382948	LOWDATA	0.455166	0.25034	-0.862503	0	1	1	no	NOTEST	1.28605	0.11924	-3.43101	0.811298	0.417194	1	no	LOWDATA	0.326537	0.458457	0.48954	0	1	1	no	LOWDATA	0.39328	0.580001	0.560497	0	1	1	no
13103.m07160	LOC_Os03g64415.1	=	kinesin motor domain containing protein, putative	chr03:36387642-36405570	LOWDATA	0.605648	0.585531	-0.048736	0	1	1	no	NOTEST	0	0	0	0	1	1	no	LOWDATA	0.507041	0.493936	-0.0377762	0	1	1	no	NOTEST	0	0	0	0	1	1	no
13104.m00062	LOC_Os04g01510.1	=	DUF1295 domain containing protein, putative, expressed	chr04:353026-371449	LOWDATA	6.23361	6.08948	-0.0337484	0	1	1	no	OK	8.3396	7.66849	-0.121035	0.078559	0.937383	0.995648	no	OK	7.59904	7.30889	-0.0561655	0.0336719	0.973139	1	no	OK	8.22052	9.733	0.243655	-0.151974	0.879208	1	no
13104.m00080	LOC_Os04g01674.1	=	erythronate-4-phosphate dehydrogenase domain containing protein, expressed	chr04:435005-456130	LOWDATA	0.470724	0.31034	-0.60103	0	1	1	no	NOTEST	2.20685	1.75174	-0.333195	0.236291	0.813207	1	no	NOTEST	0	0	0	0	1	1	no	NOTEST	2.89423	3.42296	0.242069	-0.289051	0.772542	1	no
13104.m11862	LOC_Os04g02530.3	=	expressed protein	chr04:920712-955636	LOWDATA	0.0909775	0	-1e+300	0	1	1	no	LOWDATA	0	0	-1e+300	0	1	1	no	NOTEST	0.0305236	0	0	0	1	1	no	NOTEST	0	0	0	0	1	1	no
13104.m00172	LOC_Os04g02530.1	=	expressed protein	chr04:920712-955636	LOWDATA	0.106553	0	-1e+300	0	1	1	no	LOWDATA	0	0	-1e+300	0	1	1	no	NOTEST	0	0	0	0	1	1	no	NOTEST	0	0	0	0	1	1	no
13104.m00221	LOC_Os04g02960.1	=	OsSub32 - Putative Subtilisin homologue	chr04:1172326-1198573	LOWDATA	0.00629503	0.00963028	0.613363	0	1	1	no	NOTEST	0.0162153	0	-1e+300	-1e+300	0.029219	1	no	NOTEST	0.00192783	0.00405467	1.07261	-0.517952	0.604492	1	no	NOTEST	0.00340121	0.000954672	-1.83297	0.0392314	0.968706	1	no
13104.m00233	LOC_Os04g03100.1	=	OsSub35 - Putative Subtilisin homologue, expressed	chr04:1205046-1280650	LOWDATA	0.113649	0.274995	1.27482	0	1	1	no	NOTEST	0.0349686	0	-1e+300	-1e+300	0.0849465	1	no	LOWDATA	0.11522	0.216401	0.909319	0	1	1	no	NOTEST	0.0200811	0.0323195	0.686563	-0.402986	0.686958	1	no
13104.m00427	LOC_Os04g05050.2	=	pectate lyase precursor, putative, expressed	chr04:2476023-2500526	LOWDATA	0.694523	0.757555	0.125327	0	1	1	no	NOTEST	3.07729	0.679124	-2.17991	0.821073	0.411604	1	no	LOWDATA	0.276205	0.503463	0.866148	0	1	1	no	FAIL	1.08867	0.658868	0	0	1	1	no
13104.m00882	LOC_Os04g09900.2	=	ent-kaurene synthase, chloroplast precursor, putative, expressed	chr04:5313499-5321868	LOWDATA	0.118937	0.278484	1.2274	0	1	1	no	NOTEST	0.0931082	0	0	0	1	1	no	NOTEST	0	0	0	0	1	1	no	NOTEST	0	0	0	0	1	1	no
13104.m00909	LOC_Os04g10160.1	=	cytochrome P450, putative, expressed	chr04:5327769-5525787	LOWDATA	2.81644	38.6399	3.77815	0	1	1	no	NOTEST	1.59223	1.00971	-0.657105	0.14254	0.886653	1	no	LOWDATA	1.0743	17.9179	4.05994	0	1	1	no	OK	1.76747	13.0037	2.87917	-0.487965	0.625574	1	no
13104.m00947	LOC_Os04g10530.1	=	amidase, putative, expressed	chr04:5723437-5727391	LOWDATA	0	0	0	0	1	1	no	OK	5.13865	1.08822	-2.23943	2.77143	0.00558112	0.0681431	no	NOTEST	0	0	0	0	1	1	no	OK	3.22482	3.761	0.221897	-0.226712	0.820648	1	no
13104.m01107	LOC_Os04g12090.1	=	retrotransposon protein, putative, Ty1-copia subclass, expressed	chr04:6648452-6652721	LOWDATA	0.0551672	0.0294806	-0.904043	0	1	1	no	NOTEST	0.0127313	0	-1e+300	-1e+300	0.221874	1	no	LOWDATA	0.092099	0.0976866	0.084975	0	1	1	no	NOTEST	0	0	0	0	1	1	no
13104.m01171	LOC_Os04g12760.1	=	retrotransposon protein, putative, unclassified	chr04:7020070-7161676	LOWDATA	0.000195983	0.000630618	1.68604	0	1	1	no	NOTEST	0.00396704	0	0	0	1	1	no	LOWDATA	0.00102033	0.00131343	0.364313	0	1	1	no	NOTEST	0.00286123	0	0	0	1	1	no
13104.m01174	LOC_Os04g12790.1	=	conserved hypothetical protein	chr04:7020070-7161676	LOWDATA	0.226402	0.240638	0.0879814	0	1	1	no	NOTEST	0	0	0	0	1	1	no	NOTEST	0	0	0	0	1	1	no	NOTEST	0	0	0	0	1	1	no
13104.m01178	LOC_Os04g12830.1	=	conserved hypothetical protein	chr04:7020070-7161676	LOWDATA	1.27002	1.7285	0.444675	0	1	1	no	NOTEST	0	0	0	0	1	1	no	LOWDATA	0.956672	1.21734	0.347634	0	1	1	no	NOTEST	0	0	0	0	1	1	no
13104.m01179	LOC_Os04g12840.1	=	resistance protein, putative, expressed	chr04:7020070-7161676	LOWDATA	0.932021	1.66104	0.833653	0	1	1	no	NOTEST	0	0	0	0	1	1	no	LOWDATA	1.19051	0.510506	-1.22158	0	1	1	no	NOTEST	0	0	0	0	1	1	no
13104.m01181	LOC_Os04g12864.1	=	retrotransposon protein, putative, unclassified	chr04:7020070-7161676	LOWDATA	0.0176249	0.0132712	-0.409321	0	1	1	no	NOTEST	0.00735096	0.00180055	-2.0295	0.0758142	0.939567	1	no	LOWDATA	0.00709639	0.00876827	0.305207	0	1	1	no	NOTEST	0.000696099	0.00523504	2.91084	-0.0527827	0.957905	1	no
13104.m01183	LOC_Os04g12890.1	=	retrotransposon protein, putative, unclassified	chr04:7020070-7161676	LOWDATA	0.11006	0.485017	2.13975	0	1	1	no	LOWDATA	0.0397156	0.202625	2.35103	0	1	1	no	LOWDATA	0.15181	0.388026	1.35389	0	1	1	no	LOWDATA	0.0839491	0.46384	2.46604	0	1	1	no
13104.m01227	LOC_Os04g13364.1	=	transposon protein, putative, CACTA, En/Spm sub-class, expressed	chr04:7419052-7684745	LOWDATA	0.0546181	0.458052	3.06806	0	1	1	no	NOTEST	0.083112	0.036402	-1.19104	0.236005	0.813428	1	no	NOTEST	0.0456658	0.311296	2.7691	-0.150928	0.880032	1	no	LOWDATA	0.0169789	0.0323013	0.927849	0	1	1	no
13104.m01237	LOC_Os04g13470.1	=	expressed protein	chr04:7419052-7684745	LOWDATA	7.11182	8.00782	0.171191	0	1	1	no	OK	8.19776	2.72348	-1.58978	2.16982	0.0300204	0.194474	no	LOWDATA	8.73138	12.5562	0.52412	0	1	1	no	LOWDATA	8.11241	14.6139	0.849135	0	1	1	no
13104.m01968	LOC_Os04g21320.1	=	membrane associated DUF588 domain containing protein, putative, expressed	chr04:12017628-12020284	LOWDATA	20.4813	26.6893	0.381954	0	1	1	no	OK	37.0361	73.3828	0.986509	-3.37357	0.000742015	0.0160704	yes	OK	25.7513	27.9127	0.116274	-0.292084	0.770223	1	no	OK	43.9021	59.9407	0.449247	-1.55917	0.118956	0.676642	no
13104.m02259	LOC_Os04g24220.2	=	OsWAK32 - OsWAK receptor-like protein kinase, expressed	chr04:13853730-13859011	LOWDATA	0.599284	0.377751	-0.665806	0	1	1	no	NOTEST	0.52648	0	0	0	1	1	no	LOWDATA	0.335082	0.288283	-0.217029	0	1	1	no	NOTEST	0	0.637052	1e+300	1e+300	0.131548	1	no
13104.m02380	LOC_Os04g25360.2	=	tRNA methyltransferase complex GCD14 subunit, putative, expressed	chr04:14666039-14669919	LOWDATA	0.88834	1.31008	0.560475	0	1	1	no	NOTEST	0.652595	1.69061	1.37328	-0.182163	0.855455	1	no	LOWDATA	0.294498	0.78986	1.42334	0	1	1	no	LOWDATA	0.241906	0.55846	1.20701	0	1	1	no
13104.m02545	LOC_Os04g26900.1	=	conserved hypothetical protein	chr04:15717225-15756195	LOWDATA	0.143167	0.0832894	-0.781493	0	1	1	no	NOTEST	0.159937	0.201757	0.33511	-0.0993396	0.920869	1	no	NOTEST	0.126116	0.0474821	-1.4093	0.211227	0.83271	1	no	NOTEST	0.106149	0	-1e+300	-1e+300	0.10652	1	no
13104.m02546	LOC_Os04g26910.1	=	oxidoreductase, aldo/keto reductase family protein, putative, expressed	chr04:15717225-15756195	LOWDATA	29.5491	29.1682	-0.0187171	0	1	1	no	OK	28.4853	35.6342	0.323045	-0.683074	0.49456	0.774815	no	OK	31.8194	29.6538	-0.101688	0.199426	0.841929	1	no	OK	31.9805	43.7217	0.451158	-0.988752	0.322784	0.994468	no
13104.m02547	LOC_Os04g26920.1	=	oxidoreductase, aldo/keto reductase family protein, putative, expressed	chr04:15717225-15756195	LOWDATA	4.12642	4.28059	0.0529205	0	1	1	no	LOWDATA	1.38588	6.54214	2.23896	0	1	1	no	LOWDATA	1.02296	2.41042	1.23654	0	1	1	no	LOWDATA	0.290599	1.92543	2.72808	0	1	1	no
13104.m02548	LOC_Os04g26920.2	=	oxidoreductase, aldo/keto reductase family protein, putative, expressed	chr04:15717225-15756195	LOWDATA	14.8297	7.95547	-0.898467	0	1	1	no	LOWDATA	14.348	8.46513	-0.761246	0	1	1	no	OK	4.75913	4.13902	-0.201408	0.188077	0.850816	1	no	OK	8.02066	6.76223	-0.246222	0.312927	0.754336	1	no
13104.m02648	LOC_Os04g28010.2	=	expressed protein	chr04:16347872-16370724	LOWDATA	0.144604	0.228188	0.658117	0	1	1	no	LOWDATA	0.0874439	0.0587815	-0.572995	0	1	1	no	LOWDATA	0.0979442	0.242042	1.30523	0	1	1	no	LOWDATA	0.053822	0.100252	0.897355	0	1	1	no
13104.m02680	LOC_Os04g28300.1	=	Rf1, mitochondrial precursor, putative, expressed	chr04:16489837-16585360	LOWDATA	0.783898	0.408205	-0.941371	0	1	1	no	NOTEST	1.10423	0.256516	-2.10592	3.0634	0.00218838	1	no	NOTEST	0.365657	0.0730579	-2.32338	0.43271	0.665226	1	no	LOWDATA	0.121138	0.165448	0.449728	0	1	1	no
13104.m02865	LOC_Os04g30210.1	=	OsFBL15 - F-box domain and LRR containing protein, expressed	chr04:17734016-17892861	LOWDATA	0.744237	1.01136	0.442467	0	1	1	no	NOTEST	0.857864	1.10843	0.369703	-0.25556	0.798291	1	no	LOWDATA	1.54319	2.34265	0.602225	0	1	1	no	NOTEST	0	0.789434	1e+300	1e+300	0.350937	1	no
13104.m02942	LOC_Os04g30910.1	=	SAM domain family protein, expressed	chr04:18294905-18311270	LOWDATA	1.81308	2.19784	0.277644	0	1	1	no	NOTEST	0	0	0	0	1	1	no	NOTEST	1.12699	1.10829	-0.024142	0.00435152	0.996528	1	no	NOTEST	0	0.176771	1e+300	1e+300	0.0708849	1	no
13104.m03051	LOC_Os04g31924.2	=	nodulin, putative, expressed	chr04:18950601-18955117	LOWDATA	0.639267	0.440539	-0.537149	0	1	1	no	LOWDATA	0.612221	0.0908844	-2.75195	0	1	1	no	NOTEST	0.0433136	0.180823	2.06168	-0.0705747	0.943736	1	no	NOTEST	0.105758	0.0280645	-1.91395	0.0373991	0.970167	1	no
13104.m03113	LOC_Os04g32510.1	=	expressed protein	chr04:19391972-19404502	LOWDATA	0.33996	0.313249	-0.118054	0	1	1	no	LOWDATA	0.599065	0.545687	-0.134639	0	1	1	no	LOWDATA	0.229804	0.0843428	-1.44607	0	1	1	no	LOWDATA	0.110514	0.288043	1.38206	0	1	1	no
13104.m03118	LOC_Os04g32550.1	=	defender against cell death 1, putative, expressed	chr04:19426227-19428944	LOWDATA	30.7039	25.2176	-0.283987	0	1	1	no	OK	32.8299	24.813	-0.403918	0.841595	0.400015	0.711988	no	OK	34.0963	26.3538	-0.371604	0.561149	0.574696	1	no	OK	34.8156	36.333	0.0615479	-0.10546	0.91601	1	no
13104.m03259	LOC_Os04g33650.1	=	hypothetical protein	chr04:20208645-20238450	LOWDATA	0.290874	0.317483	0.126285	0	1	1	no	NOTEST	0.576677	0	0	0	1	1	no	LOWDATA	0.222982	0.640957	1.5233	0	1	1	no	NOTEST	0.417796	0	0	0	1	1	no
13104.m03402	LOC_Os04g34984.1	=	ubiquitin carboxyl-terminal hydrolase domain containing protein, expressed	chr04:21092011-21109759	LOWDATA	3.33461	4.20008	0.332901	0	1	1	no	OK	3.83765	1.66652	-1.20338	1.913	0.0557479	0.275095	no	OK	2.84449	4.8418	0.767373	-0.564732	0.572256	1	no	LOWDATA	3.84541	3.91616	0.0263012	0	1	1	no
13104.m03426	LOC_Os04g35240.1	=	CAMK_CAMK_like.25 - CAMK includes calcium/calmodulin depedent protein kinases, expressed	chr04:21242514-21248009	LOWDATA	16.5917	15.9357	-0.0581975	0	1	1	no	LOWDATA	10.0054	10.3759	0.0524553	0	1	1	no	LOWDATA	13.639	16.425	0.268159	0	1	1	no	OK	11.5228	16.0898	0.481658	-0.814314	0.415465	1	no
13104.m03466	LOC_Os04g35530.1	=	expressed protein	chr04:21450512-21460890	LOWDATA	0.394188	0.848472	1.10598	0	1	1	no	LOWDATA	0.24734	0.107666	-1.19994	0	1	1	no	LOWDATA	0.0972391	0.0758387	-0.358602	0	1	1	no	NOTEST	0	0	0	0	1	1	no
13104.m03505	LOC_Os04g35860.1	=	T-complex protein 11, putative, expressed	chr04:21670335-21684438	LOWDATA	0.0320846	0.214241	2.73928	0	1	1	no	LOWDATA	0.102369	0.0534774	-0.936774	0	1	1	no	NOTEST	0	0	0	0	1	1	no	LOWDATA	0.0558245	0.0543637	-0.0382538	0	1	1	no
13104.m03551	LOC_Os04g36730.1	=	PHD finger protein, putative, expressed	chr04:22003894-22006733	LOWDATA	6.56067	7.34301	0.162528	0	1	1	no	LOWDATA	5.8214	4.05134	-0.522968	0	1	1	no	OK	7.01743	7.8475	0.16129	-0.217112	0.828121	1	no	LOWDATA	6.10712	8.23301	0.430929	0	1	1	no
13104.m03584	LOC_Os04g37520.1	=	extracellular ligand-gated ion channel, putative, expressed	chr04:22145082-22209064	LOWDATA	0.264701	0.434699	0.715651	0	1	1	no	LOWDATA	0.132643	0.0958432	-0.468804	0	1	1	no	LOWDATA	0.675597	0.384499	-0.813183	0	1	1	no	LOWDATA	0.163062	0.274893	0.753448	0	1	1	no
13104.m03586	LOC_Os04g37540.1	=	expressed protein	chr04:22145082-22209064	LOWDATA	0.128631	0.292346	1.18444	0	1	1	no	LOWDATA	0.259609	0.0726293	-1.83772	0	1	1	no	LOWDATA	0.357535	0.427252	0.257002	0	1	1	no	LOWDATA	0.403082	0.60039	0.574826	0	1	1	no
13104.m03587	LOC_Os04g37550.1	=	aspartic proteinase nepenthesin-2 precursor, putative, expressed	chr04:22145082-22209064	LOWDATA	1.79573	2.59596	0.531699	0	1	1	no	LOWDATA	4.64922	2.73096	-0.767584	0	1	1	no	LOWDATA	3.40583	4.27606	0.328277	0	1	1	no	LOWDATA	2.77813	3.4719	0.321612	0	1	1	no
13104.m03592	LOC_Os04g37600.1	=	phosphate carrier protein, mitochondrial precursor, putative, expressed	chr04:22145082-22209064	LOWDATA	3.37093	2.62214	-0.362403	0	1	1	no	LOWDATA	3.84269	0.508251	-2.9185	0	1	1	no	LOWDATA	2.69331	2.3334	-0.206944	0	1	1	no	LOWDATA	2.66103	2.26106	-0.234982	0	1	1	no
13104.m03593	LOC_Os04g37619.1	=	zeaxanthin epoxidase, chloroplast precursor, putative, expressed	chr04:22145082-22209064	LOWDATA	15.21	14.3514	-0.0838296	0	1	1	no	LOWDATA	21.5526	21.6665	0.00760681	0	1	1	no	LOWDATA	12.3371	15.4721	0.326667	0	1	1	no	LOWDATA	24.8391	34.9982	0.494665	0	1	1	no
13104.m03595	LOC_Os04g37630.1	=	mitochondrial carrier protein, putative, expressed	chr04:22145082-22209064	LOWDATA	1.23027	3.42726	1.47808	0	1	1	no	NOTEST	0	0	0	0	1	1	no	NOTEST	0	0	0	0	1	1	no	LOWDATA	1.1896	0.519138	-1.19629	0	1	1	no
13104.m03596	LOC_Os04g37630.2	=	mitochondrial carrier protein, putative, expressed	chr04:22145082-22209064	LOWDATA	1.64226	0.416962	-1.9777	0	1	1	no	LOWDATA	3.82564	3.53389	-0.114442	0	1	1	no	LOWDATA	1.71902	0.457653	-1.90926	0	1	1	no	LOWDATA	0.351158	0.971262	1.46774	0	1	1	no
13104.m03620	LOC_Os04g37810.2	=	expressed protein	chr04:22281253-22298634	LOWDATA	0.375479	0.465451	0.309895	0	1	1	no	NOTEST	0	0	0	0	1	1	no	NOTEST	0.195651	0	0	0	1	1	no	LOWDATA	0.402724	0.89357	1.14979	0	1	1	no
13104.m03621	LOC_Os04g37820.1	=	cytokinin-O-glucosyltransferase 2, putative, expressed	chr04:22281253-22298634	LOWDATA	1.54386	3.17086	1.03833	0	1	1	no	LOWDATA	1.97988	2.88833	0.544825	0	1	1	no	LOWDATA	1.48591	2.05591	0.468427	0	1	1	no	NOTEST	2.48162	0.585296	-2.08405	1.00716	0.313857	1	no
13104.m03634	LOC_Os04g37920.3	=	FAD binding domain of DNA photolyase domain containing protein, expressed	chr04:22364756-22381843	LOWDATA	6.42764	7.06718	0.136845	0	1	1	no	LOWDATA	11.8329	9.34668	-0.34028	0	1	1	no	OK	13.2957	14.7415	0.148922	-0.243552	0.807578	1	no	OK	15.605	18.6331	0.255862	-0.471776	0.637086	1	no
13104.m03632	LOC_Os04g37920.1	=	FAD binding domain of DNA photolyase domain containing protein, expressed	chr04:22364756-22381843	LOWDATA	9.9184	4.72239	-1.07059	0	1	1	no	LOWDATA	8.8492	7.24248	-0.289064	0	1	1	no	OK	3.00196	2.38748	-0.330413	0.126537	0.899307	1	no	NOTEST	2.13603	0.654665	-1.7061	0.155275	0.876605	1	no
13104.m03698	LOC_Os04g38520.1	=	CPuORF18 - conserved peptide uORF-containing transcript, expressed	chr04:22645618-22851883	LOWDATA	22.7799	29.5483	0.375313	0	1	1	no	LOWDATA	34.7616	28.4446	-0.289336	0	1	1	no	LOWDATA	23.5594	31.7457	0.430263	0	1	1	no	LOWDATA	26.7549	33.9519	0.343691	0	1	1	no
13104.m03699	LOC_Os04g38530.1	=	aldose 1-epimerase, putative, expressed	chr04:22645618-22851883	LOWDATA	3.97621	4.85018	0.286644	0	1	1	no	LOWDATA	1.9195	4.75925	1.31	0	1	1	no	LOWDATA	7.62915	5.1351	-0.571128	0	1	1	no	LOWDATA	9.33164	2.25976	-2.04596	0	1	1	no
13104.m03701	LOC_Os04g38540.1	=	aldose 1-epimerase, putative, expressed	chr04:22645618-22851883	LOWDATA	3.05132	28.1959	3.20798	0	1	1	no	LOWDATA	0.822082	2.24011	1.44621	0	1	1	no	LOWDATA	1.92718	11.8875	2.62489	0	1	1	no	LOWDATA	5.16554	4.96799	-0.0562573	0	1	1	no
13104.m03707	LOC_Os04g38590.1	=	hypothetical protein	chr04:22645618-22851883	LOWDATA	27.9327	34.4878	0.304131	0	1	1	no	LOWDATA	27.1113	8.06992	-1.74827	0	1	1	no	LOWDATA	8.1411	16.0975	0.983543	0	1	1	no	LOWDATA	8.28654	31.6388	1.93285	0	1	1	no
13104.m03710	LOC_Os04g38600.1	=	glyceraldehyde-3-phosphate dehydrogenase, putative, expressed	chr04:22645618-22851883	LOWDATA	6.01955	1.36669	-2.13897	0	1	1	no	LOWDATA	9.28231	7.67612	-0.274107	0	1	1	no	LOWDATA	3.7764	1.82143	-1.05194	0	1	1	no	NOTEST	0.595404	0	0	0	1	1	no
13104.m03711	LOC_Os04g38600.2	=	glyceraldehyde-3-phosphate dehydrogenase, putative, expressed	chr04:22645618-22851883	LOWDATA	1.49842	6.02261	2.00695	0	1	1	no	LOWDATA	5.91557	8.58348	0.537046	0	1	1	no	NOTEST	0.893831	0	0	0	1	1	no	OK	16.9498	0	0	0	1	1	no
13104.m03708	LOC_Os04g38600.3	=	glyceraldehyde-3-phosphate dehydrogenase, putative, expressed	chr04:22645618-22851883	LOWDATA	132.849	58.1217	-1.19264	0	1	1	no	LOWDATA	341.596	156.928	-1.12219	0	1	1	no	LOWDATA	228.927	50.5262	-2.17979	0	1	1	no	LOWDATA	153.242	131.691	-0.218656	0	1	1	no
13104.m03717	LOC_Os04g38640.1	=	OsDegp5 - Putative Deg protease homologue, expressed	chr04:22645618-22851883	LOWDATA	4.83066	0.910116	-2.4081	0	1	1	no	LOWDATA	6.44451	0.8662	-2.8953	0	1	1	no	LOWDATA	1.30959	1.57495	0.266182	0	1	1	no	LOWDATA	2.37312	6.00035	1.33826	0	1	1	no
13104.m03722	LOC_Os04g38680.1	=	transmembrane amino acid transporter protein, putative, expressed	chr04:22645618-22851883	LOWDATA	10.8803	30.518	1.48794	0	1	1	no	LOWDATA	20.2417	28.3839	0.48774	0	1	1	no	LOWDATA	10.9175	19.6962	0.85128	0	1	1	no	LOWDATA	13.3608	24.509	0.875302	0	1	1	no
13104.m11907	LOC_Os04g38700.2	=	molybdopterin biosynthesis protein CNX3, putative, expressed	chr04:22645618-22851883	LOWDATA	10.5221	15.4149	0.550903	0	1	1	no	LOWDATA	11.2361	13.834	0.30007	0	1	1	no	LOWDATA	5.61833	6.25047	0.153825	0	1	1	no	LOWDATA	5.40724	6.5496	0.276514	0	1	1	no
13104.m03726	LOC_Os04g38720.1	=	no apical meristem protein, putative, expressed	chr04:22645618-22851883	LOWDATA	9.60441	7.9697	-0.269173	0	1	1	no	LOWDATA	8.40879	9.1191	0.116993	0	1	1	no	LOWDATA	8.91828	11.7423	0.396878	0	1	1	no	LOWDATA	9.31657	10.0111	0.10373	0	1	1	no
13104.m03728	LOC_Os04g38740.1	=	MYB family transcription factor, putative, expressed	chr04:22645618-22851883	LOWDATA	1.35994	0.868243	-0.647367	0	1	1	no	LOWDATA	2.62791	0.957529	-1.45653	0	1	1	no	LOWDATA	0.694326	0.807922	0.218604	0	1	1	no	LOWDATA	6.05033	2.10815	-1.52104	0	1	1	no
13104.m03729	LOC_Os04g38750.1	=	plastid-specific 30S ribosomal protein 3, chloroplast precursor, putative, expressed	chr04:22645618-22851883	LOWDATA	37.4691	28.1513	-0.412498	0	1	1	no	LOWDATA	77.7368	53.7524	-0.532267	0	1	1	no	LOWDATA	37.3919	23.9028	-0.645544	0	1	1	no	LOWDATA	74.1933	61.794	-0.263822	0	1	1	no
13104.m03779	LOC_Os04g39130.1	=	conserved hypothetical protein	chr04:23050659-23337949	LOWDATA	0.419859	1.36924	1.7054	0	1	1	no	LOWDATA	2.31164	0.275983	-3.06626	0	1	1	no	LOWDATA	1.19814	0.980237	-0.289596	0	1	1	no	FAIL	1.64901	1.21901	0	0	1	1	no
13104.m03781	LOC_Os04g39150.1	=	pathogenesis-related Bet v I family protein, putative, expressed	chr04:23050659-23337949	LOWDATA	64.5278	49.2111	-0.390936	0	1	1	no	LOWDATA	132.079	173.212	0.391133	0	1	1	no	LOWDATA	62.967	80.5809	0.355841	0	1	1	no	FAIL	256.513	241.949	0	0	1	1	no
13104.m03785	LOC_Os04g39170.1	=	expressed protein	chr04:23050659-23337949	LOWDATA	1.62193	1.30994	-0.308209	0	1	1	no	LOWDATA	1.66066	0.978684	-0.76284	0	1	1	no	LOWDATA	0.245276	1.62416	2.72722	0	1	1	no	FAIL	0.691509	1.66197	0	0	1	1	no
13104.m03784	LOC_Os04g39170.2	=	expressed protein	chr04:23050659-23337949	LOWDATA	0.870217	5.69378	2.70994	0	1	1	no	LOWDATA	1.73458	2.19661	0.340691	0	1	1	no	LOWDATA	2.68071	3.99343	0.575014	0	1	1	no	FAIL	2.47472	3.27934	0	0	1	1	no
13104.m03791	LOC_Os04g39230.1	=	expressed protein	chr04:23050659-23337949	LOWDATA	2.56861	0.589842	-2.12259	0	1	1	no	LOWDATA	0.0921967	0.101373	0.136891	0	1	1	no	LOWDATA	2.63444	0.66665	-1.98249	0	1	1	no	FAIL	0.547227	0.962363	0	0	1	1	no
13104.m03808	LOC_Os04g39330.1	=	hypothetical protein	chr04:23050659-23337949	LOWDATA	0.0720848	0.178775	1.31037	0	1	1	no	NOTEST	0.157184	0	0	0	1	1	no	LOWDATA	0.12799	0.186724	0.544882	0	1	1	no	FAIL	0	0	0	0	1	1	no
13104.m03817	LOC_Os04g39420.1	=	6-phosphofructokinase 2, putative, expressed	chr04:23050659-23337949	LOWDATA	4.56419	8.19747	0.844821	0	1	1	no	LOWDATA	4.81567	11.2243	1.22081	0	1	1	no	LOWDATA	5.08023	9.35191	0.880366	0	1	1	no	FAIL	6.17529	13.991	0	0	1	1	no
13104.m03821	LOC_Os04g39440.3	=	ras-related protein, putative, expressed	chr04:23050659-23337949	LOWDATA	0.327716	0.859786	1.39153	0	1	1	no	LOWDATA	3.76777	0.680192	-2.4697	0	1	1	no	LOWDATA	0.840305	1.80507	1.10307	0	1	1	no	FAIL	0	4.09146	0	0	1	1	no
13104.m03823	LOC_Os04g39440.4	=	ras-related protein, putative, expressed	chr04:23050659-23337949	LOWDATA	1.08703	6.26222	2.52628	0	1	1	no	LOWDATA	3.60901	3.3382	-0.11253	0	1	1	no	LOWDATA	0.978982	1.47007	0.58653	0	1	1	no	FAIL	0.316604	1.73819	0	0	1	1	no
13104.m03820	LOC_Os04g39440.2	=	ras-related protein, putative, expressed	chr04:23050659-23337949	LOWDATA	10.4272	22.7805	1.12745	0	1	1	no	LOWDATA	4.05841	11.161	1.45948	0	1	1	no	LOWDATA	9.50701	25.1262	1.40213	0	1	1	no	FAIL	14.7365	18.5404	0	0	1	1	no
13104.m03827	LOC_Os04g39460.1	=	NBS-LRR type disease resistance protein, putative, expressed	chr04:23050659-23337949	LOWDATA	0.663112	0.922779	0.476732	0	1	1	no	LOWDATA	0.364163	0.306152	-0.250338	0	1	1	no	LOWDATA	0.606777	0.565612	-0.101354	0	1	1	no	FAIL	0.185801	0.376535	0	0	1	1	no
13104.m03928	LOC_Os04g40370.1	=	OsFBX142 - F-box domain containing protein, expressed	chr04:23778821-23817108	LOWDATA	2.41148	2.05454	-0.231103	0	1	1	no	NOTEST	0.933975	2.33814	1.32391	-0.205289	0.837346	1	no	LOWDATA	1.33554	1.89312	0.50335	0	1	1	no	NOTEST	0	0	0	0	1	1	no
13104.m03927	LOC_Os04g40370.2	=	OsFBX142 - F-box domain containing protein, expressed	chr04:23778821-23817108	LOWDATA	1.43304	1.61018	0.16814	0	1	1	no	NOTEST	2.0142	0.37009	-2.44426	0.362848	0.716719	1	no	OK	2.30356	2.7997	0.281407	-0.172051	0.863397	1	no	NOTEST	0	0	0	0	1	1	no
13104.m03991	LOC_Os04g40850.1	=	26S proteasome non-ATPase regulatory subunit 6, putative, expressed	chr04:24044070-24082662	LOWDATA	25.3589	25.6731	0.0177686	0	1	1	no	OK	31.9475	19.6095	-0.704154	1.17277	0.240888	0.571912	no	LOWDATA	25.2938	29.2218	0.208265	0	1	1	no	LOWDATA	37.5876	33.0562	-0.185334	0	1	1	no
13104.m04044	LOC_Os04g41229.2	=	helix-loop-helix DNA-binding domain containing protein, expressed	chr04:24275765-24283810	LOWDATA	1.11733	0.442881	-1.33507	0	1	1	no	LOWDATA	0.259431	0.302094	0.219649	0	1	1	no	LOWDATA	0.495664	0.348358	-0.508794	0	1	1	no	LOWDATA	0.193029	0.787388	2.02826	0	1	1	no
13104.m04050	LOC_Os04g41280.1	=	ankyrin repeat domain containing protein, expressed	chr04:24295541-24336492	LOWDATA	2.24339	2.63775	0.233626	0	1	1	no	NOTEST	1.99205	2.84322	0.513276	-0.186196	0.852291	1	no	LOWDATA	1.87548	2.82993	0.593506	0	1	1	no	LOWDATA	3.46634	4.97924	0.522511	0	1	1	no
13104.m04053	LOC_Os04g41310.1	=	STRUBBELIG-RECEPTOR FAMILY 8 precursor, putative, expressed	chr04:24295541-24336492	LOWDATA	7.73943	6.57141	-0.236023	0	1	1	no	OK	8.61436	8.04646	-0.0983899	0.146534	0.8835	0.97679	no	LOWDATA	5.71586	6.06788	0.0862207	0	1	1	no	OK	5.57653	7.60967	0.448467	-0.493168	0.621894	1	no
13104.m04060	LOC_Os04g41380.1	=	Leucine Rich Repeat family protein, expressed	chr04:24356705-24368345	LOWDATA	0.0655857	0.0647357	-0.0188185	0	1	1	no	NOTEST	0.0293459	0	0	0	1	1	no	NOTEST	0.0804525	0.597087	2.89173	-0.533476	0.593704	1	no	NOTEST	0	0	0	0	1	1	no
13104.m04139	LOC_Os04g42080.1	=	hypothetical protein	chr04:24726282-24728807	LOWDATA	1.12679	1.72147	0.611424	0	1	1	no	LOWDATA	2.58054	2.07648	-0.313538	0	1	1	no	NOTEST	0.568663	0.0315801	-4.17048	0.60814	0.543095	1	no	NOTEST	0.197255	0.43471	1.13999	-0.426856	0.669484	1	no
13104.m04224	LOC_Os04g42760.1	=	sialyltransferase family domain containing protein, expressed	chr04:25121994-25186983	LOWDATA	1.96672	3.42356	0.79971	0	1	1	no	NOTEST	0	0	0	0	1	1	no	OK	0	0	0	0	1	1	no	LOWDATA	0.539864	2.74637	2.34686	0	1	1	no
13104.m04383	LOC_Os04g44030.1	=	PPR repeat domain containing protein, putative, expressed	chr04:25721723-25916657	LOWDATA	0.633163	0.906993	0.518513	0	1	1	no	NOTEST	2.07207	0.591339	-1.80902	0.421089	0.67369	1	no	NOTEST	0.434436	0.740257	0.768884	-0.119936	0.904534	1	no	LOWDATA	0.454785	0.239706	-0.923917	0	1	1	no
13104.m04384	LOC_Os04g44050.1	=	expressed protein	chr04:25721723-25916657	LOWDATA	1.0661	0.843432	-0.338002	0	1	1	no	LOWDATA	0.420744	0.601577	0.515806	0	1	1	no	NOTEST	0	0.243177	1e+300	1e+300	0.437497	1	no	NOTEST	0	0	0	0	1	1	no
13104.m04385	LOC_Os04g44060.1	=	aquaporin protein, putative, expressed	chr04:25721723-25916657	LOWDATA	55.7961	25.243	-1.14428	0	1	1	no	OK	27.9477	33.5965	0.265582	-0.218668	0.826909	0.955061	no	OK	58.8125	21.6524	-1.4416	0.999596	0.317506	0.87306	no	LOWDATA	32.4951	132.057	2.02287	0	1	1	no
13104.m04470	LOC_Os04g44710.2	=	double-stranded RNA binding motif containing protein, expressed	chr04:26298541-26309771	LOWDATA	0.293133	0.191236	-0.616203	0	1	1	no	NOTEST	0.776062	0.241689	-1.68302	1.04041	0.298151	1	no	NOTEST	0.230844	0	0	0	1	1	no	NOTEST	0.980889	0.445506	-1.13865	0.483511	0.628733	1	no
13104.m04478	LOC_Os04g44780.1	=	beta-expansin precursor, putative, expressed	chr04:26320101-26346583	LOWDATA	4.0862	3.46691	-0.237109	0	1	1	no	NOTEST	0.886477	3.70187	2.0621	-0.977564	0.32829	1	no	OK	2.37469	1.84471	-0.36435	0.0186271	0.985139	1	no	NOTEST	2.51932	0.971231	-1.37515	0.291699	0.770517	1	no
13104.m04543	LOC_Os04g45290.2	=	glycosyl hydrolases, putative, expressed	chr04:26580070-26586770	LOWDATA	0.44858	0.173439	-1.37094	0	1	1	no	NOTEST	0	0	0	0	1	1	no	LOWDATA	0.0881915	0.477604	2.4371	0	1	1	no	NOTEST	0	0	0	0	1	1	no
13104.m04747	LOC_Os04g46960.2	=	glutathione peroxidase domain containing protein, expressed	chr04:27653554-27655648	LOWDATA	70.8216	104.174	0.556738	0	1	1	no	OK	75.5513	64.6374	-0.225086	0.914208	0.360607	0.68134	no	OK	114.374	151.614	0.406644	-2.25864	0.0239056	0.231484	no	LOWDATA	75.6055	156.333	1.04806	0	1	1	no
13104.m04789	LOC_Os04g47290.3	=	amine oxidase, putative, expressed	chr04:27881960-27897374	LOWDATA	0.928822	0.289736	-1.68066	0	1	1	no	LOWDATA	1.25969	0.154629	-3.02619	0	1	1	no	LOWDATA	0.150252	0.161785	0.10669	0	1	1	no	NOTEST	0.401861	0	0	0	1	1	no
13104.m04835	LOC_Os04g47670.2	=	expressed protein	chr04:28093358-28107134	LOWDATA	1.86776	2.5478	0.447945	0	1	1	no	LOWDATA	0.496301	0.272679	-0.864009	0	1	1	no	NOTEST	0.992639	1.11448	0.167026	-0.0511702	0.95919	1	no	LOWDATA	0.26384	0.294022	0.156259	0	1	1	no
13104.m04862	LOC_Os04g47860.7	=	ZOS4-11 - C2H2 zinc finger protein, expressed	chr04:28223518-28230884	LOWDATA	0.132551	0.473618	1.83717	0	1	1	no	NOTEST	0	0	0	0	1	1	no	NOTEST	0.0301256	0.1714	2.50831	-0.0107611	0.991414	1	no	LOWDATA	0.0826499	0.16099	0.961884	0	1	1	no
13104.m04861	LOC_Os04g47860.6	=	ZOS4-11 - C2H2 zinc finger protein, expressed	chr04:28223518-28230884	LOWDATA	3.6057	2.49284	-0.532488	0	1	1	no	OK	4.97758	1.50886	-1.72199	2.76928	0.00561801	0.0681518	no	LOWDATA	0.992719	0.319602	-1.63511	0	1	1	no	NOTEST	0.691244	0.0747223	-3.20958	0.0427668	0.965887	1	no
13104.m04865	LOC_Os04g47890.1	=	MYB family transcription factor, putative, expressed	chr04:28285207-28289244	LOWDATA	1.6689	3.37652	1.01664	0	1	1	no	NOTEST	2.56129	1.9813	-0.370424	0.569798	0.568815	1	no	LOWDATA	1.64639	2.44046	0.567843	0	1	1	no	OK	3.24113	2.29753	-0.496413	0.522962	0.601	1	no
13104.m05046	LOC_Os04g49440.1	=	RNA recognition motif containing protein, putative, expressed	chr04:29308344-29323985	LOWDATA	0.708398	1.54436	1.12438	0	1	1	no	OK	5.185	1.73392	-1.58031	0.0345773	0.972417	1	no	OK	2.26108	0	-1e+300	-1e+300	0.266157	0.820501	no	NOTEST	0	0	0	0	1	1	no
13104.m05224	LOC_Os04g51290.1	=	expressed protein	chr04:30192063-30199674	LOWDATA	0.621951	0.489923	-0.344247	0	1	1	no	NOTEST	1.26941	0.571895	-1.15034	0.0215371	0.982817	1	no	LOWDATA	0.555642	0.140306	-1.98558	0	1	1	no	LOWDATA	0.899838	0.257858	-1.80309	0	1	1	no
13104.m05230	LOC_Os04g51350.1	=	pentatricopeptide, putative, expressed	chr04:30224981-30228082	LOWDATA	2.40677	1.57289	-0.613677	0	1	1	no	OK	7.23379	1.85225	-1.96547	2.84692	0.00441439	0.0578183	no	LOWDATA	2.49376	1.27068	-0.972725	0	1	1	no	OK	4.4786	2.06107	-1.11965	1.34377	0.179023	0.802929	no
13104.m05434	LOC_Os04g52890.2	=	ATBAG1, putative, expressed	chr04:31312008-31330292	LOWDATA	0.555354	0.710609	0.355648	0	1	1	no	NOTEST	0	0	0	0	1	1	no	LOWDATA	0.411967	0.865015	1.0702	0	1	1	no	OK	4.34754	4.80431	0.144129	-0.00470105	0.996249	1	no
13104.m05459	LOC_Os04g53120.1	=	NB-ARC domain containing protein, expressed	chr04:31423962-31480327	LOWDATA	0.139638	0.186551	0.417876	0	1	1	no	LOWDATA	0.229086	0.0294141	-2.96131	0	1	1	no	LOWDATA	0.12656	0.267901	1.08188	0	1	1	no	LOWDATA	0.188393	0.0394786	-2.2546	0	1	1	no
13104.m05476	LOC_Os04g53230.1	=	aminomethyltransferase, putative, expressed	chr04:31507847-31528811	LOWDATA	25.6382	6.36976	-2.00898	0	1	1	no	OK	88.2368	38.0524	-1.21339	2.45971	0.0139048	0.122782	no	LOWDATA	32.2683	9.83143	-1.71464	0	1	1	no	LOWDATA	40.7523	27.6429	-0.559973	0	1	1	no
13104.m05483	LOC_Os04g53300.1	=	polyphenol oxidase, putative, expressed	chr04:31563994-31574474	LOWDATA	0.0238806	0.101516	2.0878	0	1	1	no	NOTEST	0	0	0	0	1	1	no	LOWDATA	0.559863	0.178899	-1.64593	0	1	1	no	NOTEST	0.122633	0	0	0	1	1	no
13104.m05495	LOC_Os04g53410.1	=	MBTB7 - Bric-a-Brac, Tramtrack, Broad Complex BTB domain with Meprin and TRAF Homology MATH domain, expressed	chr04:31583800-31666563	LOWDATA	2.0123	5.36705	1.41529	0	1	1	no	LOWDATA	2.60213	3.18983	0.293785	0	1	1	no	LOWDATA	3.37409	2.92982	-0.203686	0	1	1	no	LOWDATA	1.33315	4.04576	1.60157	0	1	1	no
13104.m05498	LOC_Os04g53440.2	=	RNA recognition motif containing protein, putative, expressed	chr04:31583800-31666563	LOWDATA	20.9214	22.0357	0.0748646	0	1	1	no	LOWDATA	23.9908	17.0456	-0.493076	0	1	1	no	LOWDATA	21.2287	24.4317	0.202738	0	1	1	no	LOWDATA	24.5356	28.7806	0.23022	0	1	1	no
13104.m05500	LOC_Os04g53450.1	=	expressed protein	chr04:31583800-31666563	LOWDATA	3.49472	5.24597	0.586036	0	1	1	no	LOWDATA	3.64061	2.25534	-0.690836	0	1	1	no	LOWDATA	5.64005	3.94811	-0.514545	0	1	1	no	LOWDATA	4.20861	4.42123	0.0711051	0	1	1	no
13104.m05547	LOC_Os04g53770.1	=	SDA1, putative, expressed	chr04:31825280-31863600	LOWDATA	8.29147	6.03224	-0.458933	0	1	1	no	LOWDATA	7.35951	3.25214	-1.17822	0	1	1	no	LOWDATA	7.22871	10.2229	0.499988	0	1	1	no	OK	10.5117	8.94788	-0.232373	0.315771	0.752176	1	no
13104.m05567	LOC_Os04g53930.2	=	organic cation transporter protein, putative, expressed	chr04:31952708-31956074	LOWDATA	0.350913	0.360054	0.0370999	0	1	1	no	LOWDATA	0.271925	0.115857	-1.23087	0	1	1	no	LOWDATA	0.0927997	0.173483	0.902598	0	1	1	no	NOTEST	0	0	0	0	1	1	no
13104.m05624	LOC_Os04g54390.1	=	nuclease PA3, putative, expressed	chr04:32171433-32193546	LOWDATA	8.90003	7.87148	-0.177176	0	1	1	no	OK	9.73514	5.78755	-0.750248	1.19994	0.230163	0.559218	no	OK	9.57158	8.23404	-0.217155	0.316539	0.751594	1	no	LOWDATA	12.3926	11.1837	-0.148084	0	1	1	no
13104.m05625	LOC_Os04g54400.1	=	BTBN12 - Bric-a-Brac, Tramtrack, Broad Complex BTB domain with non-phototropic hypocotyl 3 NPH3 and coiled-coil domains, expressed	chr04:32171433-32193546	LOWDATA	0.436612	0.384859	-0.182023	0	1	1	no	NOTEST	0.282938	0.159734	-0.824814	0.297646	0.765973	1	no	NOTEST	0.268897	0.249991	-0.105176	0.120868	0.903796	1	no	LOWDATA	0.353751	0.462061	0.385348	0	1	1	no
13104.m05651	LOC_Os04g54610.1	=	hypothetical protein	chr04:32291293-32292471	LOWDATA	0.297238	1.98165	2.73701	0	1	1	no	NOTEST	0	0	0	0	1	1	no	OK	2.87916	1.10625	-1.37997	0.346278	0.729133	1	no	NOTEST	0.864765	2.63421	1.60699	-0.363393	0.716312	1	no
13104.m05670	LOC_Os04g54790.1	=	ELMO/CED-12 family protein, putative, expressed	chr04:32389262-32423624	LOWDATA	4.06071	1.13782	-1.83546	0	1	1	no	LOWDATA	7.3686	2.27689	-1.69433	0	1	1	no	NOTEST	1.6161	1.68515	0.0603621	-0.0212884	0.983016	1	no	OK	4.87758	4.28873	-0.185617	0.117274	0.906643	1	no
13104.m05676	LOC_Os04g54820.2	=	programmed cell death 2 C-terminal domain-containing protein, putative, expressed	chr04:32389262-32423624	LOWDATA	1.29594	0.957851	-0.43612	0	1	1	no	NOTEST	1.28462	0	0	0	1	1	no	LOWDATA	0.912439	0.834599	-0.128644	0	1	1	no	NOTEST	0	0	0	0	1	1	no
13104.m05675	LOC_Os04g54820.1	=	programmed cell death 2 C-terminal domain-containing protein, putative, expressed	chr04:32389262-32423624	LOWDATA	3.07186	5.77696	0.911197	0	1	1	no	LOWDATA	3.82281	4.47647	0.227731	0	1	1	no	OK	3.35145	5.59252	0.738713	-0.660645	0.50884	0.988209	no	OK	6.30042	5.20337	-0.276001	0.340743	0.733297	1	no
13104.m05677	LOC_Os04g54830.1	=	expressed protein	chr04:32389262-32423624	LOWDATA	7.06508	19.6128	1.47302	0	1	1	no	LOWDATA	9.74724	12.5074	0.359716	0	1	1	no	LOWDATA	3.71082	13.843	1.89934	0	1	1	no	OK	2.91979	13.6744	2.22754	-0.493402	0.621729	1	no
13104.m05710	LOC_Os04g55120.1	=	jp18, putative, expressed	chr04:32588215-32609067	LOWDATA	0.584925	0.932004	0.672084	0	1	1	no	LOWDATA	0.937884	0.694298	-0.433854	0	1	1	no	LOWDATA	2.0631	0.919194	-1.16638	0	1	1	no	LOWDATA	1.17329	1.1439	-0.0366032	0	1	1	no
13104.m05874	LOC_Os04g56430.1	=	cysteine-rich receptor-like protein kinase, putative, expressed	chr04:33450792-33468767	LOWDATA	29.43	192.175	2.70706	0	1	1	no	OK	26.8623	11.8141	-1.18508	2.39677	0.0165405	0.136808	no	LOWDATA	22.7678	182.953	3.0064	0	1	1	no	OK	23.9513	81.1641	1.76074	-3.20366	0.00135693	0.0320463	yes
13104.m05881	LOC_Os04g56470.1	=	amino acid transporter, putative, expressed	chr04:33476602-33498480	LOWDATA	2.58916	10.9488	2.08022	0	1	1	no	LOWDATA	2.25733	2.76318	0.291714	0	1	1	no	OK	1.63345	9.26925	2.50453	-1.1149	0.264895	0.819266	no	OK	2.46123	7.92287	1.68664	-1.4478	0.147672	0.748159	no
13104.m05885	LOC_Os04g56490.1	=	expressed protein	chr04:33476602-33498480	LOWDATA	0.592049	0.237058	-1.32048	0	1	1	no	NOTEST	0	0	0	0	1	1	no	LOWDATA	1.5946	3.46611	1.12012	0	1	1	no	LOWDATA	0.413553	5.06202	3.61357	0	1	1	no
13104.m05888	LOC_Os04g56520.1	=	alpha-1,4-glucan-protein synthase, putative, expressed	chr04:33512604-33561853	LOWDATA	1.26579	6.21778	2.29636	0	1	1	no	OK	1.01749	4.48623	2.14049	-0.959908	0.337102	0.66097	no	LOWDATA	0.245755	4.11644	4.0661	0	1	1	no	LOWDATA	1.53253	0.89038	-0.78342	0	1	1	no
13104.m05889	LOC_Os04g56520.2	=	alpha-1,4-glucan-protein synthase, putative, expressed	chr04:33512604-33561853	LOWDATA	25.063	18.7705	-0.417097	0	1	1	no	OK	28.9928	21.6171	-0.42352	0.783538	0.433311	0.735718	no	OK	20.5386	19.1086	-0.104119	0.163166	0.870388	1	no	LOWDATA	25.7412	24.6095	-0.0648623	0	1	1	no
13104.m05899	LOC_Os04g56620.2	=	molybdopterin biosynthesis protein CNX1, putative, expressed	chr04:33575110-33587696	LOWDATA	0.461415	0.419594	-0.13707	0	1	1	no	NOTEST	0	0	0	0	1	1	no	LOWDATA	0.411328	0.445428	0.114902	0	1	1	no	NOTEST	0	0	0	0	1	1	no
13104.m05913	LOC_Os04g56720.1	=	RCC2, putative, expressed	chr04:33637301-33849626	LOWDATA	12.9113	8.05957	-0.679861	0	1	1	no	LOWDATA	11.3578	4.50568	-1.33387	0	1	1	no	LOWDATA	9.45764	5.64739	-0.743897	0	1	1	no	LOWDATA	15.8291	10.5164	-0.589938	0	1	1	no
13104.m05916	LOC_Os04g56740.1	=	IQ calmodulin-binding motif family protein, putative, expressed	chr04:33637301-33849626	LOWDATA	21.6574	18.7846	-0.205308	0	1	1	no	LOWDATA	25.5777	15.924	-0.683681	0	1	1	no	LOWDATA	17.9985	26.6547	0.566512	0	1	1	no	LOWDATA	25.7884	23.4934	-0.134468	0	1	1	no
13104.m05934	LOC_Os04g56900.1	=	transferase family protein, putative, expressed	chr04:33637301-33849626	LOWDATA	0.539964	13.0442	4.59441	0	1	1	no	LOWDATA	0.130824	0.047945	-1.44817	0	1	1	no	LOWDATA	0.177489	4.1948	4.5628	0	1	1	no	LOWDATA	0.199088	2.93854	3.88362	0	1	1	no
13104.m05938	LOC_Os04g56939.1	=	expressed protein	chr04:33637301-33849626	LOWDATA	7.92193	16.4571	1.05479	0	1	1	no	LOWDATA	14.5886	11.8984	-0.294079	0	1	1	no	LOWDATA	12.8278	13.2408	0.0457162	0	1	1	no	LOWDATA	13.1903	15.9928	0.27794	0	1	1	no
13104.m05943	LOC_Os04g56980.1	=	SWIB/MDM2 domain containing protein, expressed	chr04:33637301-33849626	LOWDATA	14.1031	15.5084	0.137042	0	1	1	no	LOWDATA	17.1339	10.0317	-0.772292	0	1	1	no	LOWDATA	13.2469	16.666	0.331255	0	1	1	no	LOWDATA	16.9739	18.1242	0.0945982	0	1	1	no
13104.m11834	LOC_Os04g56995.1	=	expressed protein	chr04:33637301-33849626	LOWDATA	4.32065	1.58748	-1.44451	0	1	1	no	LOWDATA	8.89793	6.5227	-0.448001	0	1	1	no	LOWDATA	4.43159	3.72996	-0.248667	0	1	1	no	LOWDATA	12.4803	4.40928	-1.50104	0	1	1	no
13104.m05946	LOC_Os04g57010.1	=	zinc finger C-x8-C-x5-C-x3-H type family protein, expressed	chr04:33637301-33849626	LOWDATA	10.7191	13.6328	0.3469	0	1	1	no	LOWDATA	9.87544	6.42963	-0.619108	0	1	1	no	LOWDATA	11.6297	13.1879	0.1814	0	1	1	no	LOWDATA	13.9933	11.1303	-0.33024	0	1	1	no
13104.m05949	LOC_Os04g57020.1	=	expressed protein	chr04:33637301-33849626	LOWDATA	7.75125	12.8421	0.728383	0	1	1	no	LOWDATA	12.0579	9.68077	-0.316779	0	1	1	no	LOWDATA	9.34988	12.9414	0.468972	0	1	1	no	LOWDATA	9.88525	12.6603	0.356963	0	1	1	no
13104.m05957	LOC_Os04g57090.1	=	jasmonate O-methyltransferase, putative, expressed	chr04:33637301-33849626	LOWDATA	1.24994	0.397686	-1.65215	0	1	1	no	LOWDATA	0.603681	0.276011	-1.12906	0	1	1	no	LOWDATA	1.10351	0.608791	-0.858083	0	1	1	no	LOWDATA	0.507564	0.640285	0.335125	0	1	1	no
13104.m05991	LOC_Os04g57310.1	=	thiol-disulphide oxidoreductase DCC, putative, expressed	chr04:33934241-33960141	LOWDATA	9.58652	14.9968	0.645576	0	1	1	no	OK	9.46292	7.00674	-0.433542	0.341672	0.732598	0.911777	no	OK	10.7139	16.7187	0.64198	-0.921763	0.356652	0.9033	no	OK	7.96568	16.3037	1.03333	-1.54051	0.123436	0.687261	no
13104.m05999	LOC_Os04g57360.1	=	expressed protein	chr04:33934241-33960141	LOWDATA	1.02724	1.29328	0.33227	0	1	1	no	OK	0	5.95917	1e+300	1e+300	0.076557	0.326887	no	NOTEST	0	0	0	0	1	1	no	NOTEST	0	2.4116	1e+300	1e+300	0.0363232	1	no
13104.m06169	LOC_Os04g58690.2	=	tRNA-specific adenosine deaminase 1, putative, expressed	chr04:34707823-34710855	LOWDATA	0.352265	0.508206	0.528755	0	1	1	no	NOTEST	0.438284	0	-1e+300	-1e+300	0.38502	1	no	NOTEST	0.702313	0	-1e+300	-1e+300	0.00782786	1	no	NOTEST	0.430869	0	0	0	1	1	no
13104.m00015	LOC_Os04g01140.1	=	cytochrome P450 93A2, putative, expressed	chr04:98617-100643	LOWDATA	23.6388	10.7424	-1.13784	0	1	1	no	LOWDATA	24.6305	28.0619	0.188167	0	1	1	no	LOWDATA	20.5179	18.7194	-0.132348	0	1	1	no	LOWDATA	31.974	24.9869	-0.355732	0	1	1	no
13104.m00063	LOC_Os04g01520.1	=	expressed protein	chr04:353026-371449	LOWDATA	11.4775	19.1076	0.73534	0	1	1	no	OK	17.5604	22.6256	0.365626	-0.66126	0.508446	0.784363	no	OK	11.3791	20.4433	0.845245	-1.37352	0.169591	0.690379	no	OK	11.9306	21.8247	0.871292	-1.69554	0.0899725	0.589905	no
13104.m00064	LOC_Os04g01530.1	=	adenylate kinase, putative, expressed	chr04:353026-371449	LOWDATA	1.70031	2.20604	0.375664	0	1	1	no	NOTEST	0	0	0	0	1	1	no	NOTEST	0	0.853066	1e+300	1e+300	0.384339	1	no	LOWDATA	1.23718	3.04871	1.30115	0	1	1	no
13104.m00066	LOC_Os04g01540.1	=	expressed protein	chr04:353026-371449	LOWDATA	17.4548	11.6365	-0.584964	0	1	1	no	OK	38.0246	12.77	-1.57418	1.89236	0.0584432	0.282378	no	OK	24.1648	17.8473	-0.437202	0.653826	0.513224	0.989757	no	LOWDATA	31.2044	32.5857	0.0624905	0	1	1	no
13104.m00118	LOC_Os04g02050.1	=	bifunctional 3-phosphoadenosine 5-phosphosulfate synthetase, putative, expressed	chr04:645108-649149	LOWDATA	20.2493	22.6308	0.160419	0	1	1	no	OK	31.5268	5.78684	-2.44573	5.03084	4.88346e-07	5.05203e-05	yes	OK	20.5131	22.6014	0.139867	-0.257747	0.796602	1	no	LOWDATA	20.253	15.5957	-0.376988	0	1	1	no
13104.m00174	LOC_Os04g02550.1	=	expressed protein	chr04:920712-955636	LOWDATA	0.476973	0	-1e+300	0	1	1	no	LOWDATA	0	0	-1e+300	0	1	1	no	NOTEST	0.332279	0	-1e+300	-1e+300	0.0336602	1	no	OK	3.17209	1.76602	-0.844935	0.422969	0.672318	1	no
13104.m00201	LOC_Os04g02830.1	=	expressed protein	chr04:1086925-1097856	LOWDATA	6.07544	6.68091	0.137054	0	1	1	no	LOWDATA	6.92922	5.15102	-0.427835	0	1	1	no	OK	15.8086	7.85603	-1.00884	0.261118	0.794001	1	no	LOWDATA	7.26842	9.48772	0.384419	0	1	1	no
13104.m00329	LOC_Os04g04060.1	=	dynamin family protein, putative, expressed	chr04:1869478-1872608	LOWDATA	2.08041	1.57507	-0.40145	0	1	1	no	LOWDATA	2.84024	2.48857	-0.190697	0	1	1	no	OK	1.70359	2.07993	0.287958	-0.399429	0.689577	1	no	NOTEST	2.45513	2.59604	0.0805145	-0.124299	0.901079	1	no
13104.m00760	LOC_Os04g08410.1	=	ELM2 domain containing protein, putative, expressed	chr04:4504407-4509573	LOWDATA	2.53489	2.46612	-0.0396836	0	1	1	no	OK	4.35529	2.70857	-0.685237	1.14034	0.254147	0.586249	no	LOWDATA	1.96794	1.87405	-0.070528	0	1	1	no	OK	3.26873	2.68229	-0.285265	0.30689	0.758927	1	no
13104.m00885	LOC_Os04g09920.1	=	cytochrome P450, putative, expressed	chr04:5327769-5525787	LOWDATA	9.88651	32.3086	1.70839	0	1	1	no	LOWDATA	0.678476	0.46297	-0.55138	0	1	1	no	LOWDATA	4.22819	19.7138	2.22109	0	1	1	no	OK	3.46809	16.5721	2.25655	-1.35988	0.173867	0.791841	no
13104.m00887	LOC_Os04g09940.1	=	retrotransposon protein, putative, unclassified	chr04:5327769-5525787	LOWDATA	0.00213093	0.0238781	3.48613	0	1	1	no	NOTEST	0.0077206	0.00648308	-0.252032	0.0151226	0.987934	1	no	NOTEST	0.000300299	0.00788517	4.71467	-0.0566162	0.954851	1	no	NOTEST	0.00158241	0.00170033	0.103692	-0.00710211	0.994333	1	no
13104.m00893	LOC_Os04g10000.1	=	sex determination protein tasselseed-2, putative, expressed	chr04:5327769-5525787	LOWDATA	1.93852	16.7016	3.10695	0	1	1	no	LOWDATA	0.660062	0.0882244	-2.90335	0	1	1	no	LOWDATA	0.650848	6.39698	3.297	0	1	1	no	LOWDATA	1.99654	6.1774	1.6295	0	1	1	no
13104.m00894	LOC_Os04g10010.1	=	sex determination protein tasselseed-2, putative, expressed	chr04:5327769-5525787	LOWDATA	3.59507	38.6084	3.42482	0	1	1	no	LOWDATA	0.403079	0.261335	-0.625163	0	1	1	no	LOWDATA	1.50935	21.1729	3.81022	0	1	1	no	OK	1.99578	11.2687	2.4973	-1.0028	0.315956	0.993363	no
13104.m00899	LOC_Os04g10060.1	=	ent-kaurene synthase, chloroplast precursor, putative, expressed	chr04:5327769-5525787	LOWDATA	0.836025	15.6871	4.22989	0	1	1	no	NOTEST	0.160262	0.0440476	-1.8633	0.499554	0.617389	1	no	OK	0.150017	7.42215	5.62864	-1.49996	0.133625	0.618707	no	NOTEST	0.585293	3.58	2.61273	-2.82841	0.00467797	1	no
13104.m00902	LOC_Os04g10090.1	=	retrotransposon, putative, centromere-specific	chr04:5327769-5525787	LOWDATA	0.0485146	0.120319	1.31037	0	1	1	no	NOTEST	0.141051	0	0	0	1	1	no	NOTEST	0.0689226	0.177442	1.3643	-0.242087	0.808713	1	no	NOTEST	0	0	0	0	1	1	no
13104.m00903	LOC_Os04g10100.1	=	retrotransposon protein, putative, Ty3-gypsy subclass	chr04:5327769-5525787	LOWDATA	0.00573808	0.00173306	-1.72725	0	1	1	no	NOTEST	0.00556108	0.0058107	0.0633475	-0.00326044	0.997399	1	no	NOTEST	0	0.00157366	1e+300	1e+300	0.351619	1	no	NOTEST	0.000199974	0.000738481	1.88475	-0.0414044	0.966973	1	no
13104.m00908	LOC_Os04g10150.1	=	expressed protein	chr04:5327769-5525787	LOWDATA	0.0383764	0.166558	2.11773	0	1	1	no	NOTEST	0	0	0	0	1	1	no	NOTEST	0	0.0701566	1e+300	1e+300	0.124107	1	no	NOTEST	0	0	0	0	1	1	no
13104.m00911	LOC_Os04g10180.1	=	hypothetical protein	chr04:5327769-5525787	LOWDATA	4.14288	3.10009	-0.418324	0	1	1	no	NOTEST	0	0	0	0	1	1	no	LOWDATA	1.77557	1.76318	-0.0100996	0	1	1	no	NOTEST	0.094839	0	-1e+300	-1e+300	0.158655	1	no
13104.m00913	LOC_Os04g10200.1	=	retrotransposon protein, putative, Ty3-gypsy subclass	chr04:5327769-5525787	LOWDATA	0.000518197	0.00138516	1.41848	0	1	1	no	NOTEST	0.0190837	0.00123574	-3.94889	0.305542	0.759953	1	no	NOTEST	0.000331101	0.000506245	0.612567	-0.00765759	0.99389	1	no	NOTEST	0	0.00198484	1e+300	1e+300	0.380349	1	no
13104.m00914	LOC_Os04g10210.1	=	hypothetical protein	chr04:5327769-5525787	LOWDATA	0.899061	1.02196	0.184843	0	1	1	no	NOTEST	0	0	0	0	1	1	no	NOTEST	0.106401	0.410895	1.94926	-0.435605	0.663123	1	no	NOTEST	0	0	0	0	1	1	no
13104.m00918	LOC_Os04g10240.1	=	nicotiana lesion-inducing like, putative, expressed	chr04:5327769-5525787	LOWDATA	24.2874	14.7013	-0.724267	0	1	1	no	OK	33.6937	19.7719	-0.769028	1.79579	0.0725283	0.31774	no	LOWDATA	27.9349	27.5237	-0.0213922	0	1	1	no	OK	30.0681	21.8814	-0.458534	0.831772	0.405538	1	no
13104.m01078	LOC_Os04g11840.1	=	expressed protein	chr04:6470774-6496809	LOWDATA	3.29954	2.55706	-0.36778	0	1	1	no	LOWDATA	1.00038	3.56215	1.83219	0	1	1	no	LOWDATA	0.15282	0.750691	2.29638	0	1	1	no	LOWDATA	0.687614	1.08448	0.657339	0	1	1	no
13104.m01165	LOC_Os04g12690.1	=	N-hydroxythioamide S-beta-glucosyltransferase, putative	chr04:7020070-7161676	LOWDATA	2.12338	35.281	4.05446	0	1	1	no	LOWDATA	3.47464	5.84598	0.750581	0	1	1	no	LOWDATA	1.25083	44.8826	5.1652	0	1	1	no	LOWDATA	3.49937	38.458	3.45811	0	1	1	no
13104.m01167	LOC_Os04g12710.1	=	indole-3-acetate beta-glucosyltransferase, putative	chr04:7020070-7161676	LOWDATA	0.910836	13.5536	3.89534	0	1	1	no	LOWDATA	0.744792	3.23067	2.11693	0	1	1	no	LOWDATA	0.424485	11.6311	4.77613	0	1	1	no	LOWDATA	0.566835	17.8243	4.97477	0	1	1	no
13104.m01168	LOC_Os04g12720.1	=	indole-3-acetate beta-glucosyltransferase, putative, expressed	chr04:7020070-7161676	LOWDATA	0.0115628	16.1264	10.4457	0	1	1	no	NOTEST	0.0928154	0.11704	0.334565	-0.0699352	0.944245	1	no	LOWDATA	0.164188	15.2223	6.5347	0	1	1	no	LOWDATA	0.204409	7.74714	5.24413	0	1	1	no
13104.m01169	LOC_Os04g12730.1	=	conserved hypothetical protein	chr04:7020070-7161676	LOWDATA	0.0304407	0.056621	0.895336	0	1	1	no	NOTEST	0	0	0	0	1	1	no	NOTEST	0	0	0	0	1	1	no	NOTEST	0	0	0	0	1	1	no
13104.m01170	LOC_Os04g12744.1	=	expressed protein	chr04:7020070-7161676	LOWDATA	0.0106685	0.0198439	0.895336	0	1	1	no	NOTEST	0.0232631	0.00852512	-1.44825	0.146447	0.883568	1	no	LOWDATA	0.00378712	0.0146251	1.94928	0	1	1	no	LOWDATA	0.00707997	0.0425954	2.58888	0	1	1	no
13104.m01177	LOC_Os04g12820.1	=	expressed protein	chr04:7020070-7161676	LOWDATA	0.756085	0.957367	0.340522	0	1	1	no	NOTEST	0.305781	0.256572	-0.253136	0.094581	0.924648	1	no	LOWDATA	0.304723	0.361307	0.245725	0	1	1	no	LOWDATA	0.176341	0.141457	-0.318009	0	1	1	no
13104.m01180	LOC_Os04g12850.1	=	hypothetical protein	chr04:7020070-7161676	LOWDATA	4.36736	6.96299	0.672944	0	1	1	no	NOTEST	0.151162	0.166376	0.138353	-0.0294337	0.976519	1	no	LOWDATA	3.25201	3.61536	0.152809	0	1	1	no	NOTEST	0.276345	0	0	0	1	1	no
13104.m01186	LOC_Os04g12950.1	=	indole-3-acetate beta-glucosyltransferase, putative	chr04:7020070-7161676	LOWDATA	0.173691	7.17083	5.36755	0	1	1	no	NOTEST	0.201531	0.109513	-0.879894	0.265586	0.790558	1	no	LOWDATA	0.142553	4.28032	4.90814	0	1	1	no	LOWDATA	0.190359	5.24274	4.78353	0	1	1	no
[truncated: 56,150 more rows]

## Sheet: IR-c-high
Additional file 3: Table S2. Highly expressed genes of Pok and IR29 under control conditions
[truncated: 727 more rows]

[truncated: 3 more sheets: Pok-c-high, IR-ps-high, Pok-ps-high]
